# Supplementary material for: Causes and consequences of child growth faltering in low-resource settings
Source: PubMed Central journal article supplement (PMC10511328; doi:10.1038/s41586-023-06501-x), 2023-09-13

**Supplementary information**

---

**Causes and consequences of child growth faltering in low-resource settings**

---

In the format provided by the authors and unedited

## Supplement Information for:

### Causes and consequences of child growth faltering in low- and middle-income countries

Andrew Mertens,<sup>1\*</sup> Jade Benjamin-Chung,<sup>2,3,4</sup> John M Colford Jr,<sup>1</sup> Jeremy Coyle<sup>1</sup>, Mark J van der Laan,<sup>1</sup> Alan E Hubbard,<sup>1</sup> Sonali Rosete,<sup>1</sup> Ivana Malenica,<sup>1</sup> Nima Hejazi,<sup>1</sup> Oleg Sofrygin,<sup>1</sup> Wilson Cai,<sup>1</sup> Haodong Li,<sup>1</sup> Anna Nguyen,<sup>1</sup> Nolan N Pokpongkiat,<sup>1</sup> Stephanie Djajadi,<sup>1</sup> Anmol Seth,<sup>1</sup> Esther Jung,<sup>1</sup> Esther O Chung,<sup>1</sup> Wendy Jilek,<sup>1</sup> Vishak Subramoney,<sup>5</sup> Ryan Hafen,<sup>6</sup> Jonas Häggström,<sup>7</sup> Thea Norman,<sup>8</sup> Kenneth H Brown,<sup>9</sup> Parul Christian,<sup>10</sup> Benjamin F. Arnold,<sup>11</sup> and members of the *ki* Child Growth Consortium

<sup>1</sup> Division of Epidemiology & Biostatistics, University of California, Berkeley, 2121 Berkeley Way Rm 5302 Berkeley, CA 94720-7360

<sup>2</sup> Department of Epidemiology & Population Health, Stanford University, Stanford University, 300 Pasteur Dr., Stanford, CA 94305

<sup>3</sup> Division of Epidemiology & Biostatistics, University of California, Berkeley, 2121 Berkeley Way Rm 5302 Berkeley, CA 94720-7360

<sup>4</sup> Chan Zuckerberg Biohub, San Francisco, CA 94158

<sup>5</sup> DVPL Tech

<sup>6</sup> Hafen Consulting, LLC, West Richland WA, 99353

<sup>7</sup> Cytel Inc, 1050 Winter St Suite 2700 Waltham, MA 02451, USA

<sup>8</sup> Quantitative Sciences, Bill & Melinda Gates Foundation, 500 5th Ave N, Seattle, WA 98109

<sup>9</sup> Department of Nutrition, University of California, Davis, 3135 Meyer Hall, Davis, CA 95616-5270

<sup>10</sup> Center for Human Nutrition, Department of International Health, Johns Hopkins Bloomberg School of Public Health, Baltimore, MD 21205

<sup>11</sup> Francis I. Proctor Foundation and Department of Ophthalmology, University of California, San Francisco, 490 Illinois St, San Francisco, CA 94158

### Corresponding authors:

Andrew Mertens, PhD, [amertens@berkeley.edu](mailto:amertens@berkeley.edu), Research Data Analyst, Division of Epidemiology & Biostatistics, University of California, Berkeley, 2121 Berkeley Way Rm 5302 Berkeley, CA 94720-7360

Benjamin F. Arnold, PhD, [ben.arnold@ucsf.edu](mailto:ben.arnold@ucsf.edu), Associate Professor, Francis I. Proctor Foundation, University of California, San Francisco, 490 Illinois St, San Francisco, CA 94158



## Table of Contents

|                                                                                                                                                                                                                             |    |
|-----------------------------------------------------------------------------------------------------------------------------------------------------------------------------------------------------------------------------|----|
| Supplementary Note 1. Directed Acyclic Diagrams (DAGs) .....                                                                                                                                                                | 2  |
| 1.1 Overview .....                                                                                                                                                                                                          | 2  |
| 1.2 Simplified example DAG:.....                                                                                                                                                                                            | 3  |
| 1.3 DAG used: Association between maternal weight and child growth faltering .....                                                                                                                                          | 4  |
| 1.4 Table of Adjustment Covariates .....                                                                                                                                                                                    | 4  |
| Supplementary Note 2. Complete-Case Sensitivity Analyses .....                                                                                                                                                              | 9  |
| 2.1 Heatmap of covariate missingness by study .....                                                                                                                                                                         | 9  |
| 2.2 Sensitivity analysis to complete case versus median/mode imputed analyses.....                                                                                                                                          | 9  |
| Plots comparing population intervention effect estimates (the estimates presented in Figures 2 and 3) compared to estimates only using complete-case data (excluding any observations missing covariate information). ..... | 9  |
| Supplementary Note 3. Sensitivity analysis using fixed effects models.....                                                                                                                                                  | 11 |
| 3.1 Overview .....                                                                                                                                                                                                          | 11 |
| 3.2 Primary manuscript figures recreated with estimates pooled using fixed effects.....                                                                                                                                     | 12 |
| Supplementary Note 4. Comparison of Adjusted and Unadjusted Population Intervention Effects .....                                                                                                                           | 17 |
| Supplementary Note 5. Spline plots: all exposures .....                                                                                                                                                                     | 17 |
| Supplementary Note 6. Sensitivity to dropping PROBIT trial.....                                                                                                                                                             | 77 |
| 6.1 Overview .....                                                                                                                                                                                                          | 77 |
| 6.2 Comparison of attributable differences estimated with and without the PROBIT trial.....                                                                                                                                 | 78 |
| Supplementary Note 7 Average treatment effect and relative risk plots .....                                                                                                                                                 | 78 |

## Supplementary Note 1. Directed Acyclic Diagrams (DAGs)

### 1.1 Overview

For each exposure, we used the directed acyclic graph (DAG) framework to identify potential confounders from the broader set of exposures used in the analysis. We did not adjust for characteristics that were assumed to be intermediate on the causal path between any exposure and the outcome, because while controlling for mediators may help adjust for unmeasured confounders in some conditions, it can also lead to collider bias. As DAG's were hand-drawn and are complex for the large number of exposures, we show an example DAG here and then list all potential considered for each exposure in a table below.

The DAG below shows the set of adjusted-for exposures and unadjusted-for exposures for the estimated association between maternal weight and child growth faltering. Grey variables are on the causal pathway and are not adjusted for, while blue variables were considered potential confounders and adjusted for. Note collinear variables like maternal BMI are shown as on the causal pathway in this DAG, which may not be biologically accurate, but they were not adjusted for so are included with the potential mediators.

Given the exposures measured in each study, we attempted to maximally adjust for confounding without adjusting for mediators on the casual pathway, which would remove part of the effect of the exposure on the outcome. Confounders were not measured in every cohort, so there could be residual confounding in cohort-specific estimates, and actual DAGs will look different across cohort-specific estimates for each study.

### 1.2 Simplified example DAG:

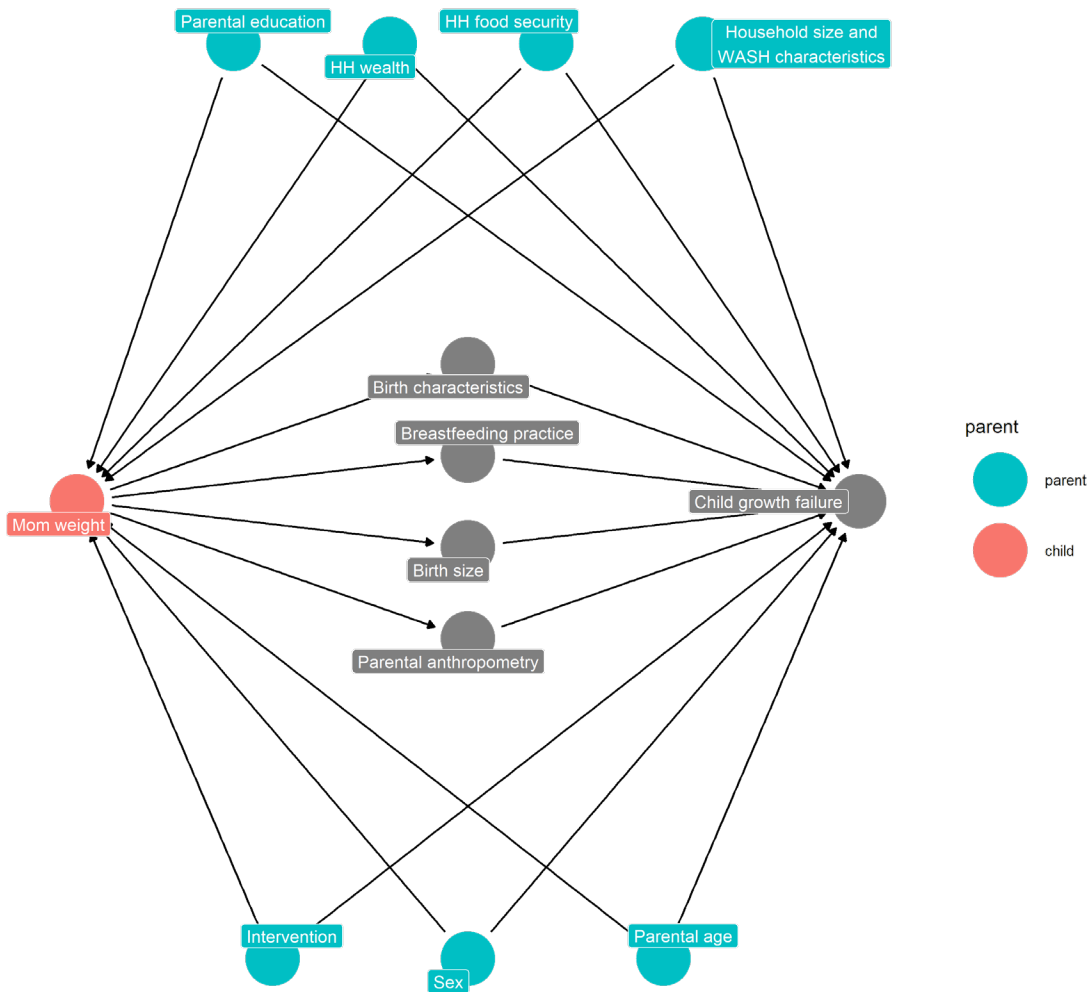

### 1.3 DAG used: Association between maternal weight and child growth faltering

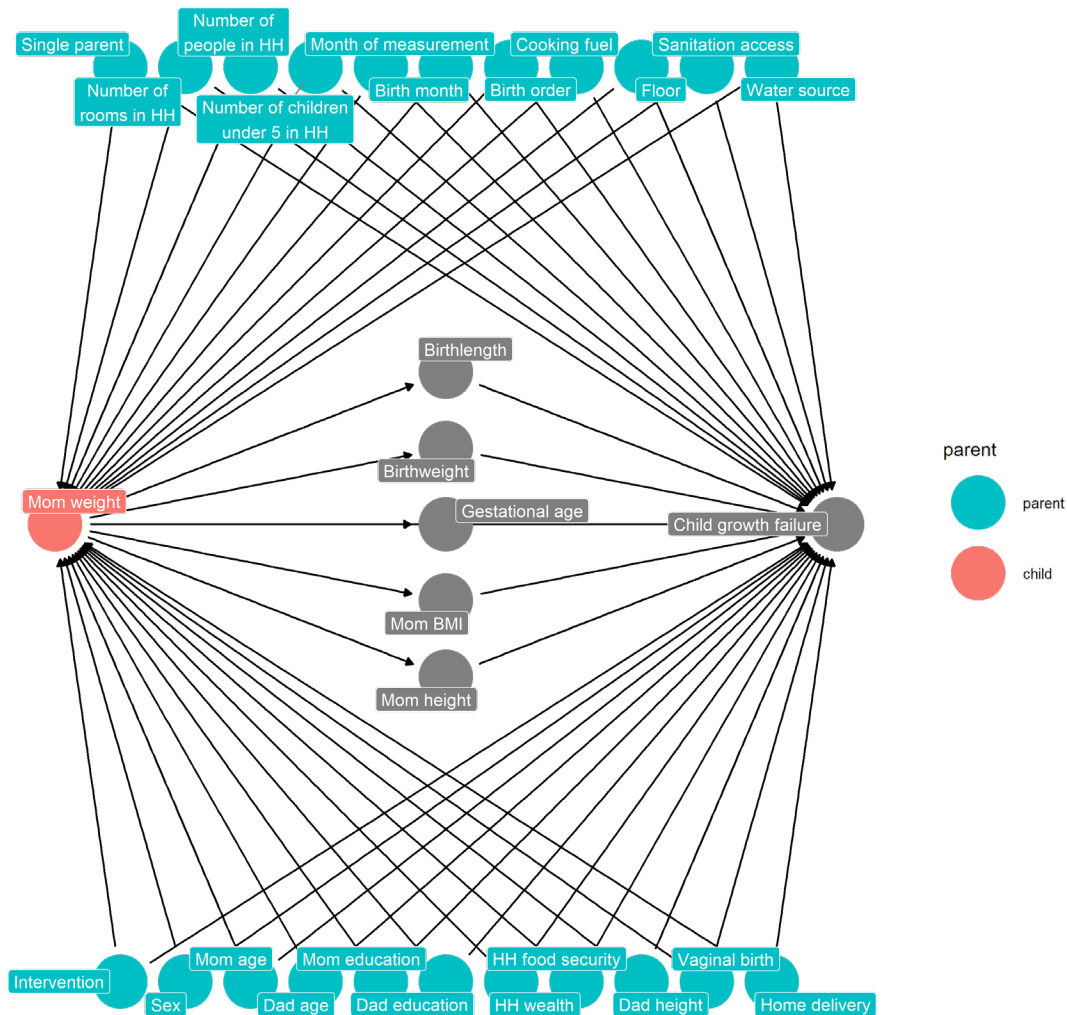

### 1.4 Table of Adjustment Covariates

| Exposure               | Potential adjustment covariates                                                                                                                                                                                                                                                                                                                |
|------------------------|------------------------------------------------------------------------------------------------------------------------------------------------------------------------------------------------------------------------------------------------------------------------------------------------------------------------------------------------|
| # of children <5 in HH | Treatment arm , Mother’s age , Father’s age , Mother’s education , Father’s education , HH wealth , HH food security , Mother’s height , Mother’s weight , BMI , Father’s height , Single parent , # of rooms in HH , Birth order , Treats drinking water , Clean cooking fuel usage, Improved floor , Improved sanitation , Safe water source |
| # of people in HH      | Treatment arm , Mother’s age , Father’s age , Mother’s education , Father’s education , HH wealth , HH food security , Mother’s height , Mother’s weight , BMI , Father’s height , Single parent , # of rooms in HH , Birth order , Treats drinking water , Clean cooking fuel usage, Improved floor , Improved sanitation , Safe water source |

| Exposure                   | Potential adjustment covariates                                                                                                                                                                                                                                                                                                                                                                                                                                                                                                     |
|----------------------------|-------------------------------------------------------------------------------------------------------------------------------------------------------------------------------------------------------------------------------------------------------------------------------------------------------------------------------------------------------------------------------------------------------------------------------------------------------------------------------------------------------------------------------------|
| # of rooms in HH           | Treatment arm , Child sex , Mother's age , Father's age , Mother's education , Father's education , HH wealth , HH food security , Mother's height , Mother's weight , BMI , Father's height , Single parent , # of people in HH , # of children <5 in HH , Birth order , Treats drinking water , Clean cooking fuel usage, Improved floor , Improved sanitation , Safe water source                                                                                                                                                |
| Any wasting <6 mo.         | Treatment arm , Child sex , Mother's age , Father's age , Mother's education , Father's education , HH wealth , HH food security , Mother's height , Mother's weight , BMI , Father's height , Vaginal birth , Child delivered at home , Single parent , # of rooms in HH , # of people in HH , # of children <5 in HH , Month of measurement , Month of Birth , Birth order , Treats drinking water , Clean cooking fuel usage, Improved floor , Improved sanitation , Safe water source                                           |
| Birth length (cm)          | Treatment arm , Child sex , Mother's age , Father's age , Mother's education , Father's education , HH wealth , HH food security , Mother's height , Mother's weight , BMI , Father's height , Vaginal birth , Child delivered at home , Single parent , # of rooms in HH , # of people in HH , # of children <5 in HH , Month of Birth , Birth order , Treats drinking water , Clean cooking fuel usage, Improved floor , Improved sanitation , Safe water source                                                                  |
| Birth order                | Treatment arm , Mother's age , Father's age , Mother's education , Father's education , HH wealth , HH food security , Mother's height , Mother's weight , BMI , Father's height , Vaginal birth , Child delivered at home , Single parent , # of rooms in HH , Treats drinking water , Clean cooking fuel usage, Improved floor , Improved sanitation , Safe water source                                                                                                                                                          |
| Birthweight (kg)           | Treatment arm , Child sex , Mother's age , Father's age , Mother's education , Father's education , HH wealth , HH food security , Mother's height , Mother's weight , BMI , Father's height , Vaginal birth , Child delivered at home , Single parent , # of rooms in HH , # of people in HH , # of children <5 in HH , Month of Birth , Birth order , Treats drinking water , Clean cooking fuel usage, Improved floor , Improved sanitation , Safe water source                                                                  |
| Breastfed hour after birth | Treatment arm , Child sex , Mother's age , Father's age , Mother's education , Father's education , HH wealth , HH food security , Mother's height , Mother's weight , BMI , Father's height , Vaginal birth , Child delivered at home , Gestational age at birth, Birthweight (kg) , Birth length (cm) , Single parent , # of rooms in HH , # of people in HH , # of children <5 in HH , Month of Birth , Birth order , Treats drinking water , Clean cooking fuel usage, Improved floor , Improved sanitation , Safe water source |
| Child delivered at home    | Treatment arm , Child sex , Mother's age , Father's age , Mother's education , Father's education , HH wealth , HH food security , Mother's height , Mother's weight , BMI , Father's height , Single parent , # of rooms in HH , # of people in HH , # of children <5 in HH , Month of Birth , Birth order , Treats                                                                                                                                                                                                                |

| Exposure                  | Potential adjustment covariates                                                                                                                                                                                                                                                                                                                                                                                                                                                                                                                            |
|---------------------------|------------------------------------------------------------------------------------------------------------------------------------------------------------------------------------------------------------------------------------------------------------------------------------------------------------------------------------------------------------------------------------------------------------------------------------------------------------------------------------------------------------------------------------------------------------|
|                           | drinking water , Clean cooking fuel usage, Improved floor , Improved sanitation , Safe water source                                                                                                                                                                                                                                                                                                                                                                                                                                                        |
| Clean cooking fuel usage  | Treatment arm , Child sex , Mother's age , Father's age , Mother's education , Father's education , HH wealth , HH food security , Mother's height , Mother's weight , BMI , Father's height , Single parent , # of rooms in HH , # of people in HH , # of children <5 in HH, Birth order , Treats drinking water , Improved floor , Improved sanitation , Safe water source                                                                                                                                                                               |
| Diarrhea <24 mo. (% days) | Treatment arm , Child sex , Mother's age , Father's age , Mother's education , Father's education , HH wealth , HH food security , Mother's height , Mother's weight , BMI , Father's height , Vaginal birth , Child delivered at home , Gestational age at birth, Birthweight (kg) , Birth length (cm) , Single parent , # of rooms in HH , # of people in HH , # of children <5 in HH , Month of measurement , Month of Birth , Birth order , Treats drinking water , Clean cooking fuel usage, Improved floor , Improved sanitation , Safe water source |
| Diarrhea <6 mo. (% days)  | Treatment arm , Child sex , Mother's age , Father's age , Mother's education , Father's education , HH wealth , HH food security , Mother's height , Mother's weight , BMI , Father's height , Vaginal birth , Child delivered at home , Gestational age at birth, Birthweight (kg) , Birth length (cm) , Single parent , # of rooms in HH , # of people in HH , # of children <5 in HH , Month of measurement , Month of Birth , Birth order , Treats drinking water , Clean cooking fuel usage, Improved floor , Improved sanitation , Safe water source |
| Excl/Pred breastfed <6mo. | Treatment arm , Child sex , Mother's age , Father's age , Mother's education , Father's education , HH wealth , HH food security , Mother's height , Mother's weight , BMI , Father's height , Vaginal birth , Child delivered at home , Gestational age at birth, Birthweight (kg) , Birth length (cm) , Single parent , # of rooms in HH , # of people in HH , # of children <5 in HH , Month of measurement , Month of Birth , Birth order , Treats drinking water , Clean cooking fuel usage, Improved floor , Improved sanitation , Safe water source |
| Father's age              | Treatment arm , Mother's age , Mother's education , Father's education , HH wealth , HH food security , Mother's height , Mother's weight , BMI , Father's height , Single parent , # of rooms in HH , # of people in HH , # of children <5 in HH , Month of Birth , Treats drinking water , Clean cooking fuel usage, Improved floor , Improved sanitation , Safe water source                                                                                                                                                                            |
| Father's education        | Treatment arm , Mother's age , Father's age , Mother's education , HH wealth , Mother's height , Mother's weight , BMI , Father's height , Gestational age at birth, Birthweight (kg) , Birth length (cm) , Single parent , # of rooms in HH , # of people in HH , # of children <5 in HH , Treats drinking water , Clean cooking fuel usage, Improved floor , Improved sanitation , Safe water source                                                                                                                                                     |
| Father's height           | Treatment arm , Mother's age , Father's age , Mother's education , Father's education , HH wealth , HH food security , Mother's height , Mother's weight                                                                                                                                                                                                                                                                                                                                                                                                   |

| Exposure                 | Potential adjustment covariates                                                                                                                                                                                                                                                                                                                                                                                          |
|--------------------------|--------------------------------------------------------------------------------------------------------------------------------------------------------------------------------------------------------------------------------------------------------------------------------------------------------------------------------------------------------------------------------------------------------------------------|
|                          | , BMI , Single parent , # of rooms in HH , Treats drinking water , Clean cooking fuel usage, Improved floor , Improved sanitation , Safe water source                                                                                                                                                                                                                                                                    |
| Gestational age at birth | Treatment arm , Child sex , Mother's age , Father's age , Mother's education , Father's education , HH wealth , HH food security , Mother's height , Mother's weight , BMI , Father's height , Single parent , # of rooms in HH , # of people in HH , # of children <5 in HH , Month of Birth , Birth order , Treats drinking water , Clean cooking fuel usage, Improved floor , Improved sanitation , Safe water source |
| HH food security         | Treatment arm , Child sex , Mother's age , Father's age , Mother's education , Father's education , HH wealth , Vaginal birth , Child delivered at home , Single parent , # of rooms in HH , # of people in HH , # of children <5 in HH , Month of Birth , Birth order , Treats drinking water , Clean cooking fuel usage, Improved floor , Improved sanitation , Safe water source                                      |
| HH wealth                | Treatment arm , Child sex , Mother's age , Father's age , Mother's education , Father's education , Gestational age at birth, Birthweight (kg) , Birth length (cm) , Single parent , # of people in HH , # of children <5 in HH , Birth order                                                                                                                                                                            |
| Improved floor           | Treatment arm , Child sex , Mother's age , Father's age , Mother's education , Father's education , HH wealth , HH food security , Mother's height , Mother's weight , BMI , Father's height , Single parent , # of rooms in HH , # of people in HH , # of children <5 in HH , Birth order , Treats drinking water , Clean cooking fuel usage, Improved sanitation , Safe water source                                   |
| Improved sanitation      | Treatment arm , Child sex , Mother's age , Father's age , Mother's education , Father's education , HH wealth , HH food security , Mother's height , Mother's weight , BMI , Father's height , Single parent , # of rooms in HH , # of people in HH , # of children <5 in HH , Birth order , Treats drinking water , Clean cooking fuel usage, Improved floor , Safe water source                                        |
| Mother's age             | Treatment arm , Father's age , Mother's education , Father's education , HH wealth , HH food security , Mother's height , Mother's weight , BMI , Father's height , Single parent , # of rooms in HH , # of people in HH , # of children <5 in HH , Treats drinking water , Clean cooking fuel usage, Improved floor , Improved sanitation , Safe water source                                                           |
| Mother's BMI             | Treatment arm , Mother's age , Father's age , Mother's education , Father's education , HH wealth , HH food security , Father's height , Single parent , # of rooms in HH , # of people in HH , # of children <5 in HH , Month of Birth , Birth order , Treats drinking water , Clean cooking fuel usage, Improved floor , Improved sanitation , Safe water source                                                       |
| Mother's education       | Treatment arm , Mother's age , Father's age , Father's education , HH wealth , Mother's height , Mother's weight , BMI , Father's height , Gestational age at birth, Birthweight (kg) , Birth length (cm) , Single parent , # of rooms in HH                                                                                                                                                                             |

| Exposure                  | Potential adjustment covariates                                                                                                                                                                                                                                                                                                                                                                                                                                                           |
|---------------------------|-------------------------------------------------------------------------------------------------------------------------------------------------------------------------------------------------------------------------------------------------------------------------------------------------------------------------------------------------------------------------------------------------------------------------------------------------------------------------------------------|
|                           | , # of people in HH , # of children <5 in HH , Treats drinking water , Clean cooking fuel usage, Improved floor , Improved sanitation , Safe water source                                                                                                                                                                                                                                                                                                                                 |
| Mother's height           | Treatment arm , Mother's age , Father's age , Mother's education , Father's education , HH wealth , HH food security , Father's height , Single parent , # of rooms in HH , Treats drinking water , Clean cooking fuel usage, Improved floor , Improved sanitation , Safe water source                                                                                                                                                                                                    |
| Mother's weight           | Treatment arm , Mother's age , Father's age , Mother's education , Father's education , HH wealth , HH food security , Father's height , Single parent , # of rooms in HH , # of people in HH , # of children <5 in HH , Month of Birth , Birth order , Treats drinking water , Clean cooking fuel usage, Improved floor , Improved sanitation , Safe water source                                                                                                                        |
| Persistent wasting <6 mo. | Treatment arm , Child sex , Mother's age , Father's age , Mother's education , Father's education , HH wealth , HH food security , Mother's height , Mother's weight , BMI , Father's height , Vaginal birth , Child delivered at home , Single parent , # of rooms in HH , # of people in HH , # of children <5 in HH , Month of measurement , Month of Birth , Birth order , Treats drinking water , Clean cooking fuel usage, Improved floor , Improved sanitation , Safe water source |
| Safe water source         | Treatment arm , Child sex , Mother's age , Father's age , Mother's education , Father's education , HH wealth , HH food security , Mother's height , Mother's weight , BMI , Father's height , Single parent , # of rooms in HH , # of people in HH , # of children <5 in HH , Birth order , Treats drinking water , Clean cooking fuel usage, Improved floor , Improved sanitation                                                                                                       |
| Single parent             | Treatment arm , Mother's age , Father's age , Mother's education , Father's education , HH wealth , HH food security , Mother's height , Mother's weight , BMI , Father's height , # of rooms in HH , # of people in HH , # of children <5 in HH , Treats drinking water , Clean cooking fuel usage, Improved floor , Improved sanitation , Safe water source                                                                                                                             |
| Small for gestational age | Treatment arm , Child sex , Mother's age , Father's age , Mother's education , Father's education , HH wealth , HH food security , Mother's height , Mother's weight , BMI , Father's height , Single parent , # of rooms in HH , # of people in HH , # of children <5 in HH , Month of Birth , Birth order , Treats drinking water , Clean cooking fuel usage, Improved floor , Improved sanitation , Safe water source                                                                  |
| Treats drinking water     | Treatment arm , Child sex , Mother's age , Father's age , Mother's education , Father's education , HH wealth , HH food security , Mother's height , Mother's weight , BMI , Father's height , Single parent , # of rooms in HH , # of people in HH , # of children <5 in HH , Month of Birth , Birth order , Clean cooking fuel usage, Improved floor , Improved sanitation , Safe water source                                                                                          |





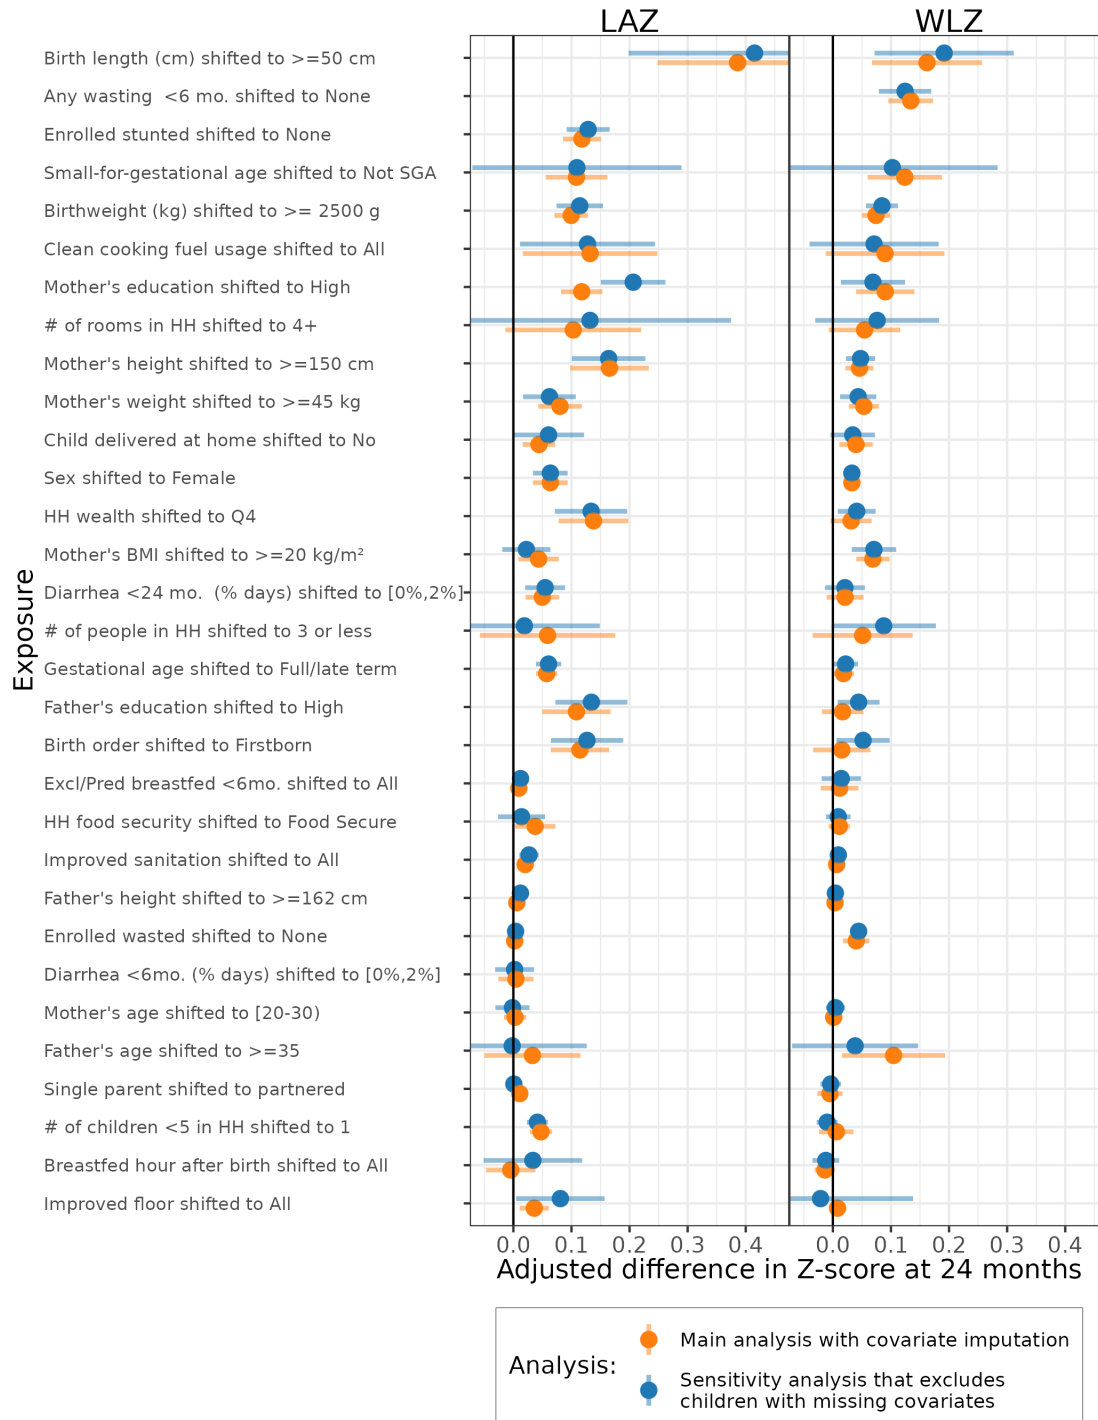

The median absolute difference in pooled Z-scores was 0.009 and the mean absolute difference was 0.022.

## Supplementary Note 3. Sensitivity analysis using fixed effects models

### 3.1 Overview

In the primary manuscript, we compared estimates pooled across studies using random effects models, which are more conservative in the presence of heterogeneity across studies. Here, we present estimates pooled using fixed effects. Inferences about estimates from fixed effects models are restricted to only the included studies, while random effects estimates assume included studies are sampled from a distribution of hypothetical studies. Fixed effect estimates had narrow confidence intervals, and therefore more risk factors had statistically significant PIEs. The fixed effect estimates are weighted towards results from larger studies, so are more heavily influenced by the large Jivita-3, Probit, and ZVITAMBO trials. But in general, the key exposures identified from the random-effects estimates also had the strongest associations when pooled using fixed-effect estimates.

### 3.2 Primary manuscript figures recreated with estimates pooled using fixed effects

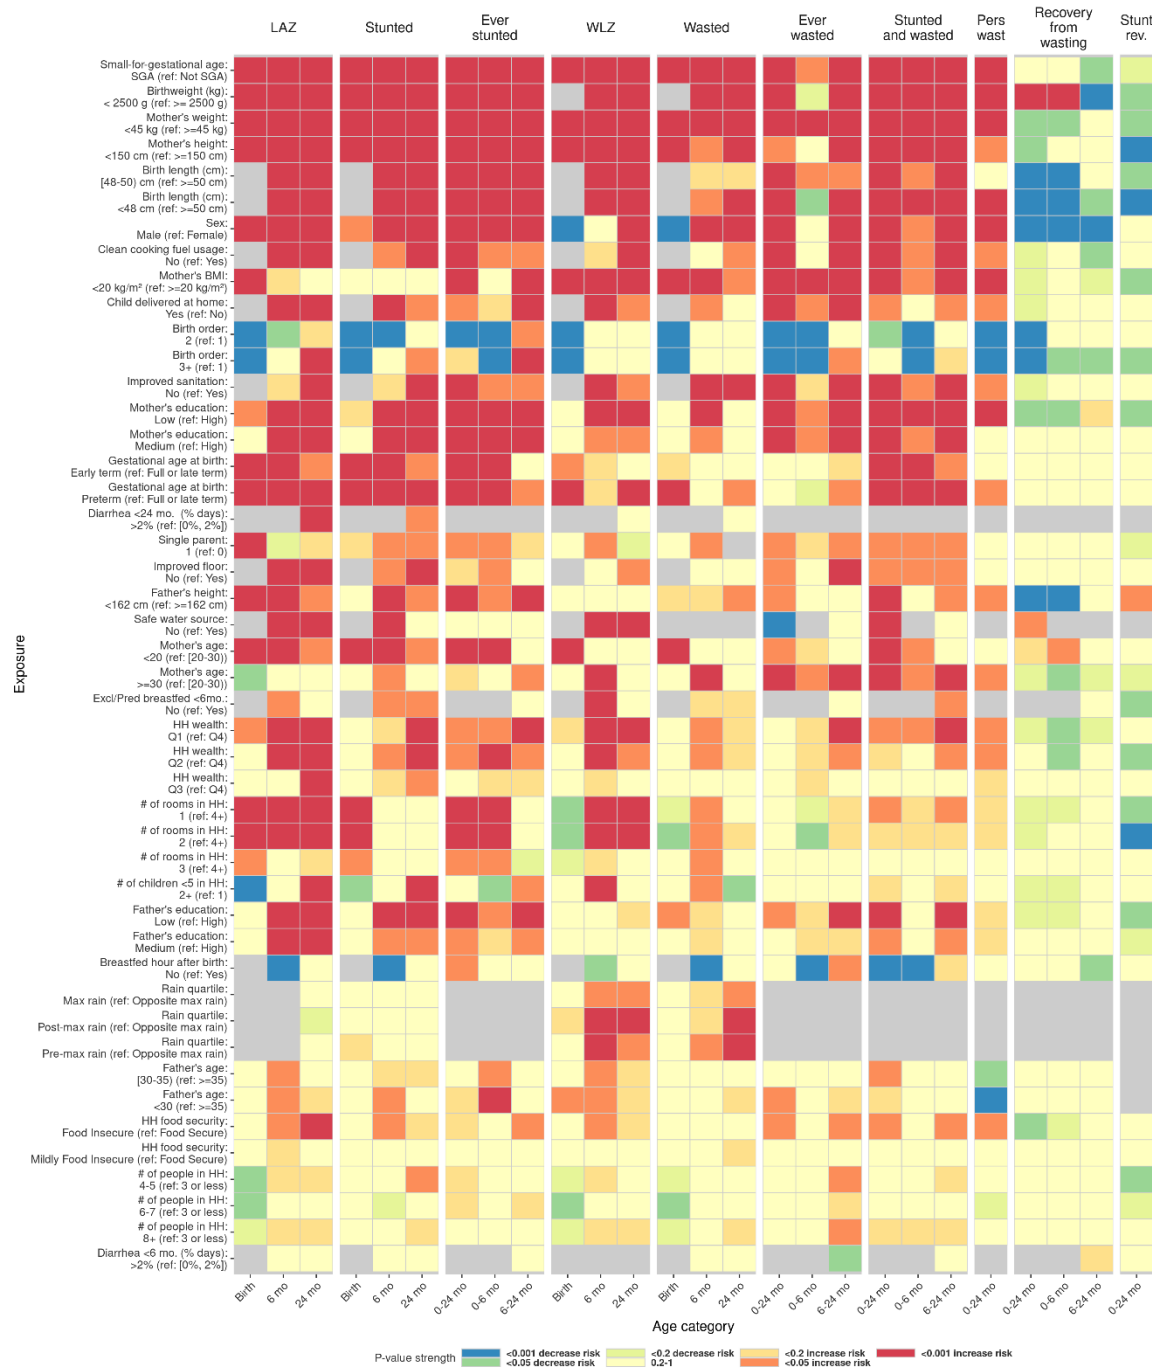

**Heatmap of significance and direction across exposure-outcome combinations of associations estimated using fixed effects.**

# Attributable difference - LAZ, stratified by age

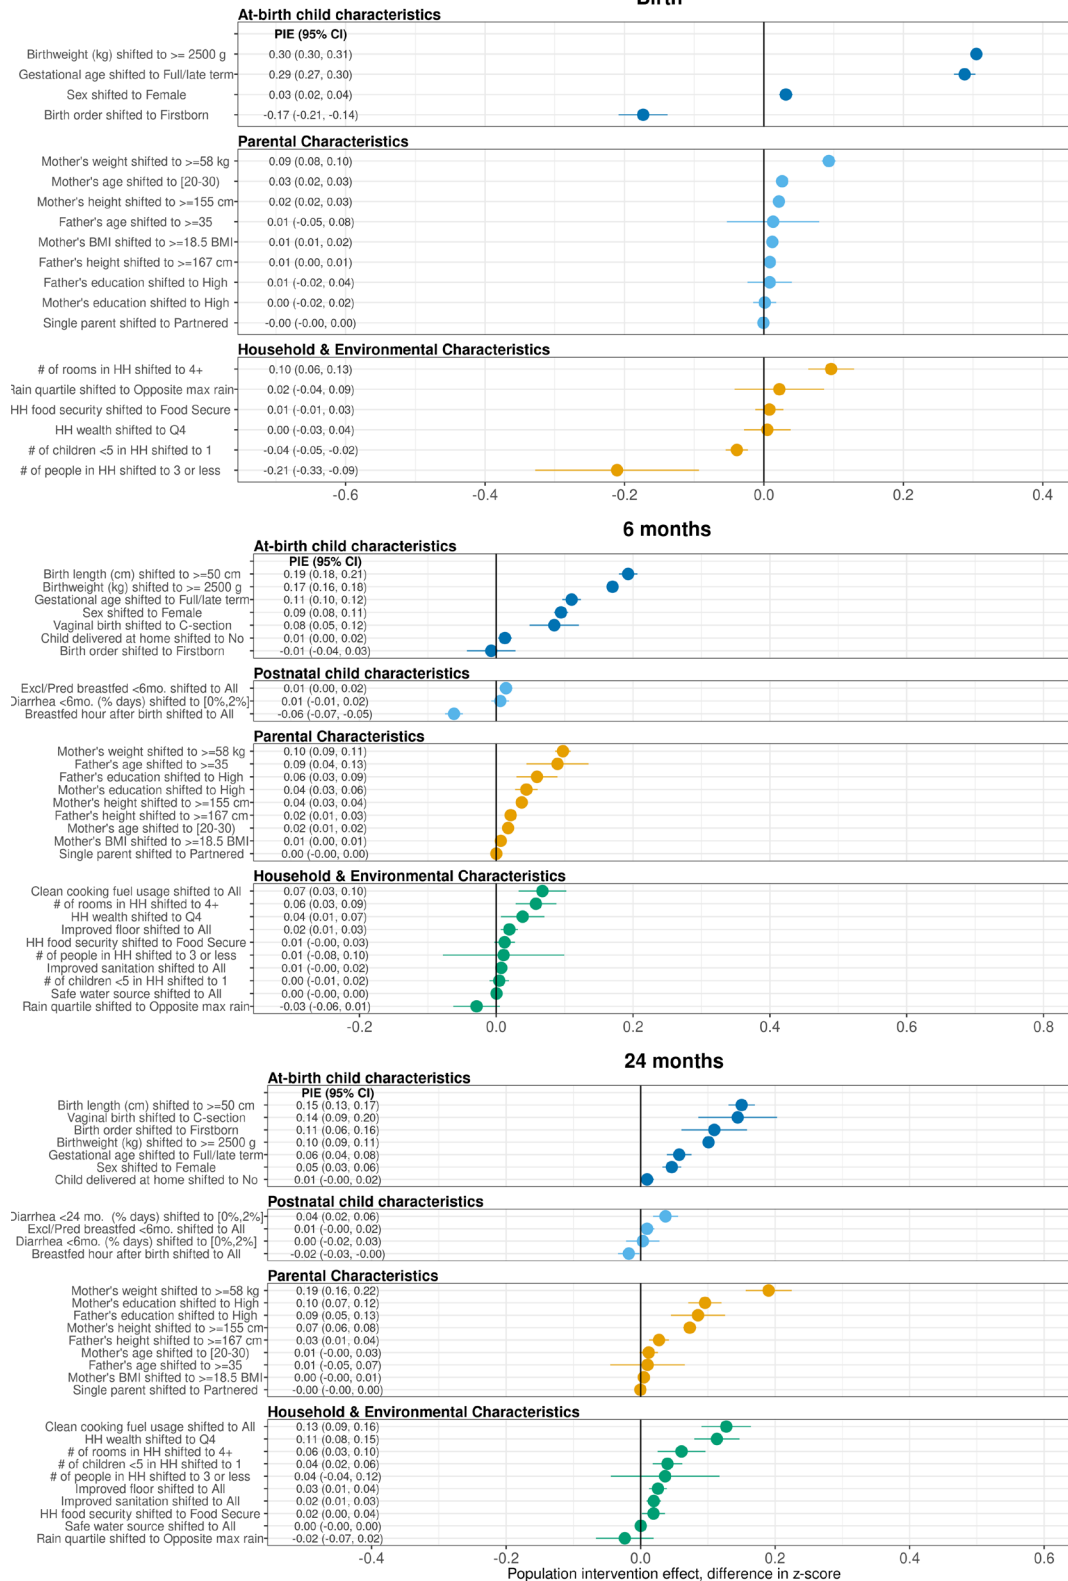

Age-stratified population attributable differences in length-for-age Z-scores estimated using fixed effects.

# Attributable difference - WLZ, stratified by age

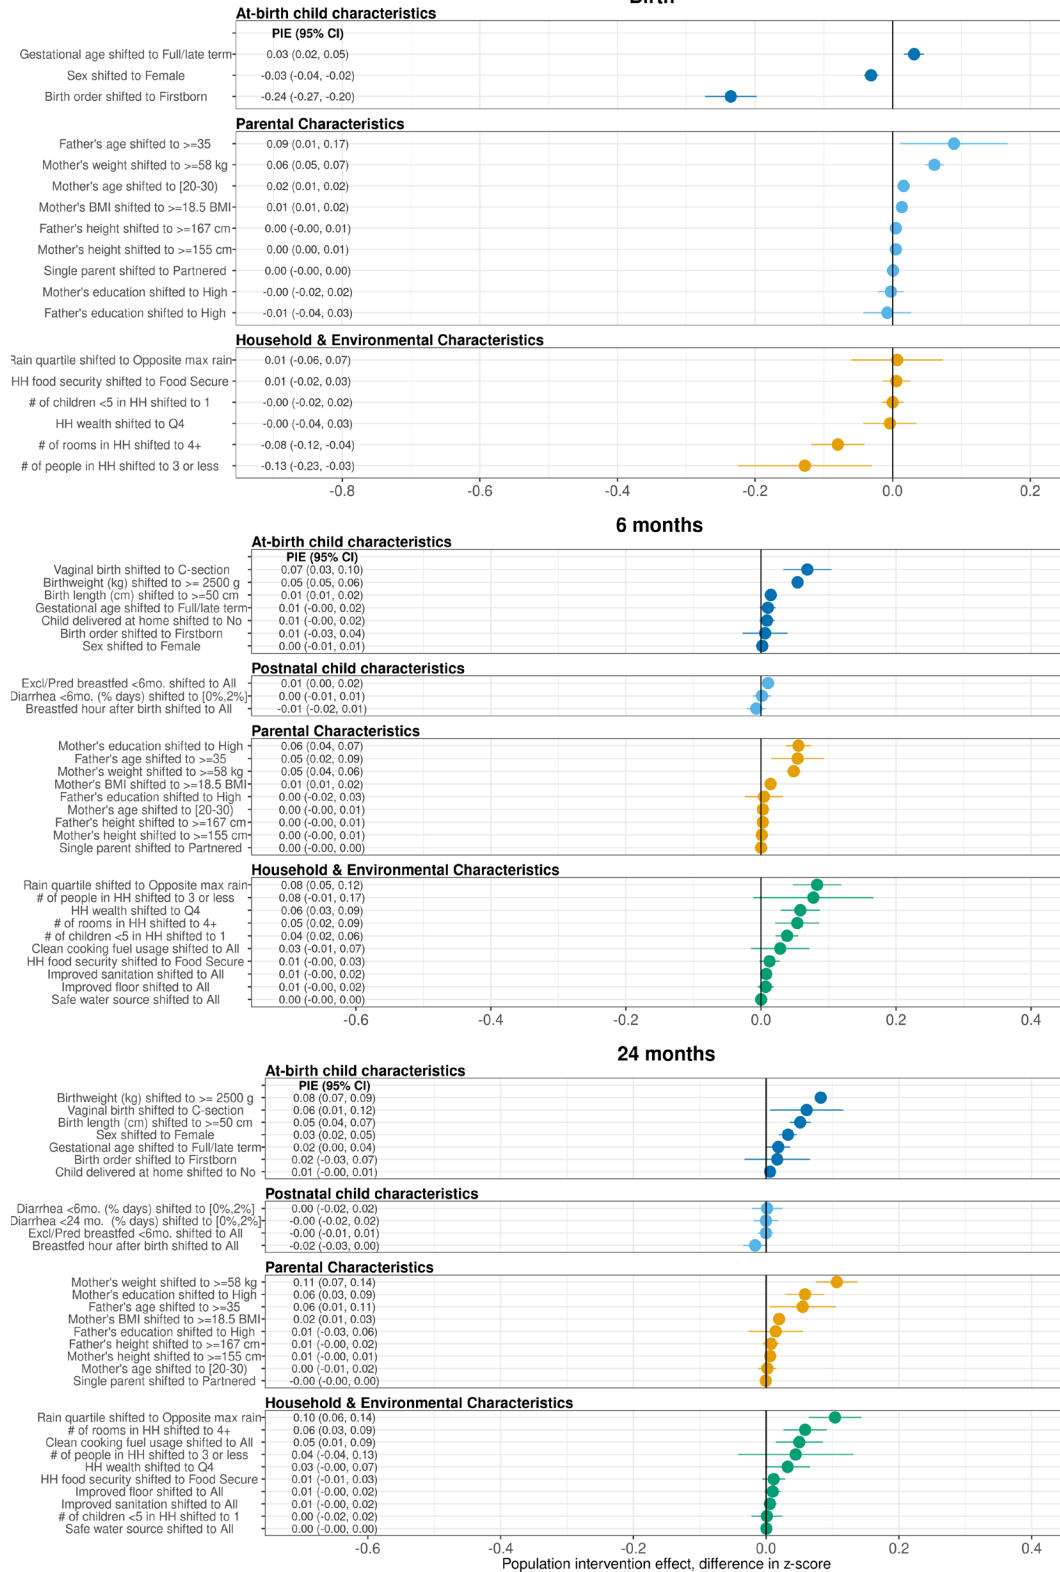

Age-stratified population attributable differences in weight-for-length Z-scores estimated using fixed effects.

# Population intervention effect - LAZ, stratified by region

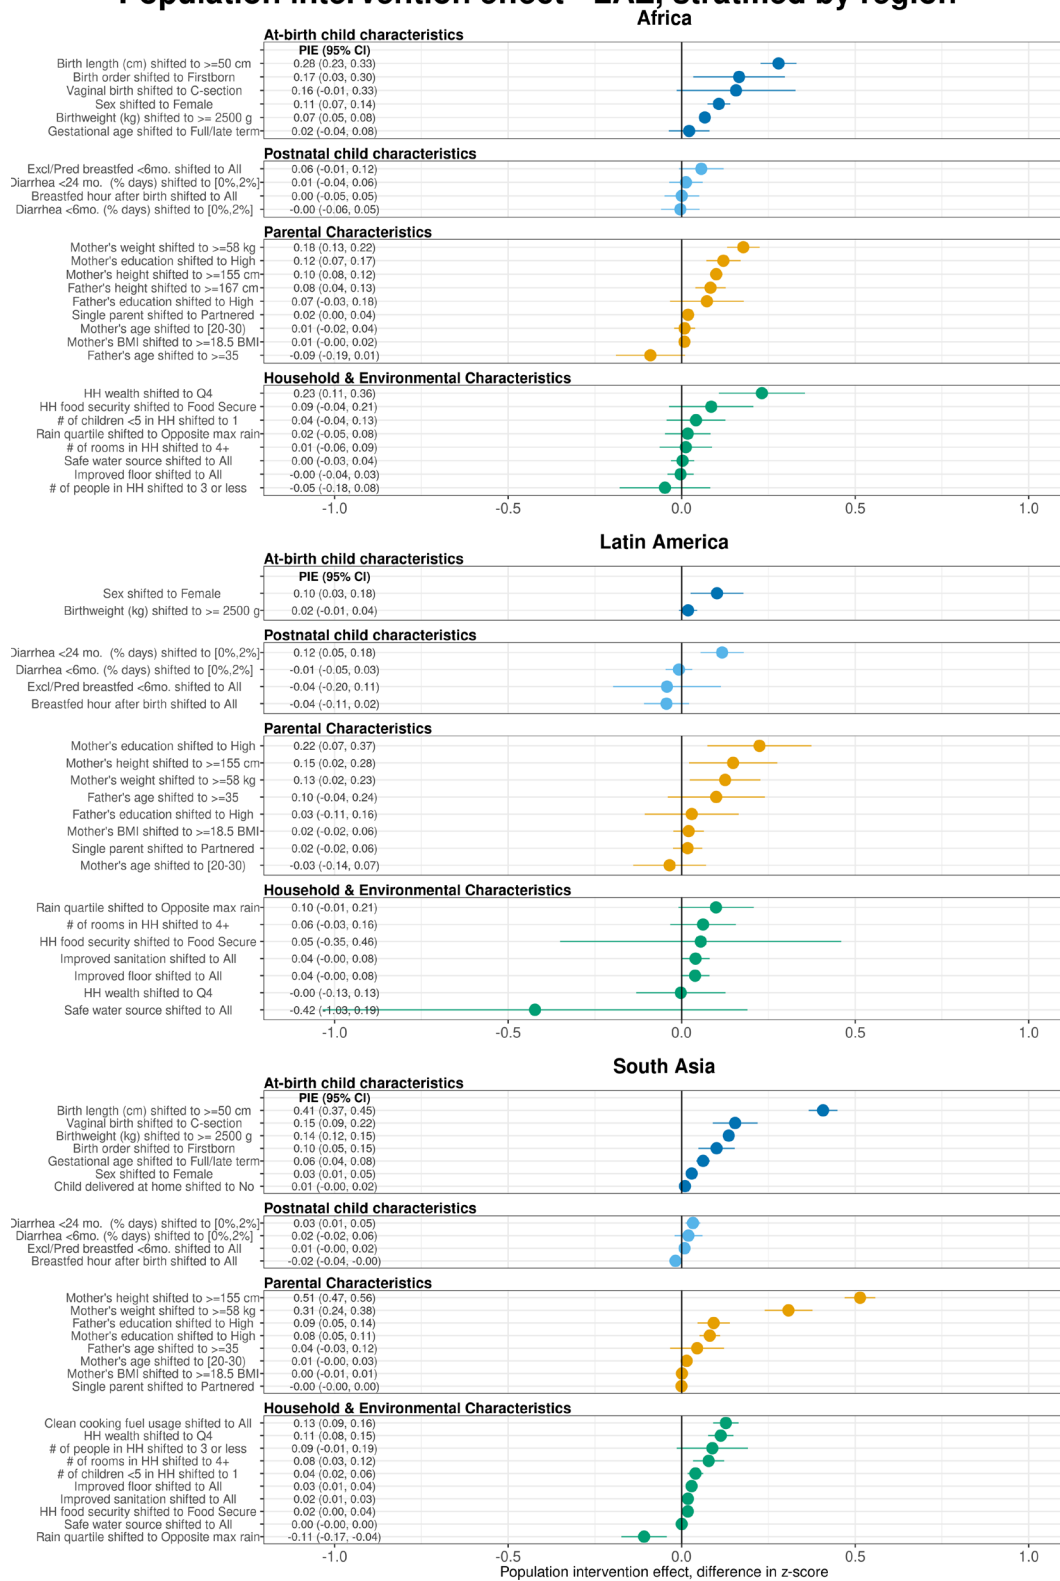

Region-stratified population attributable differences in length-for-age Z-scores estimated using fixed effects.

# Population intervention effect - WLZ, stratified by region

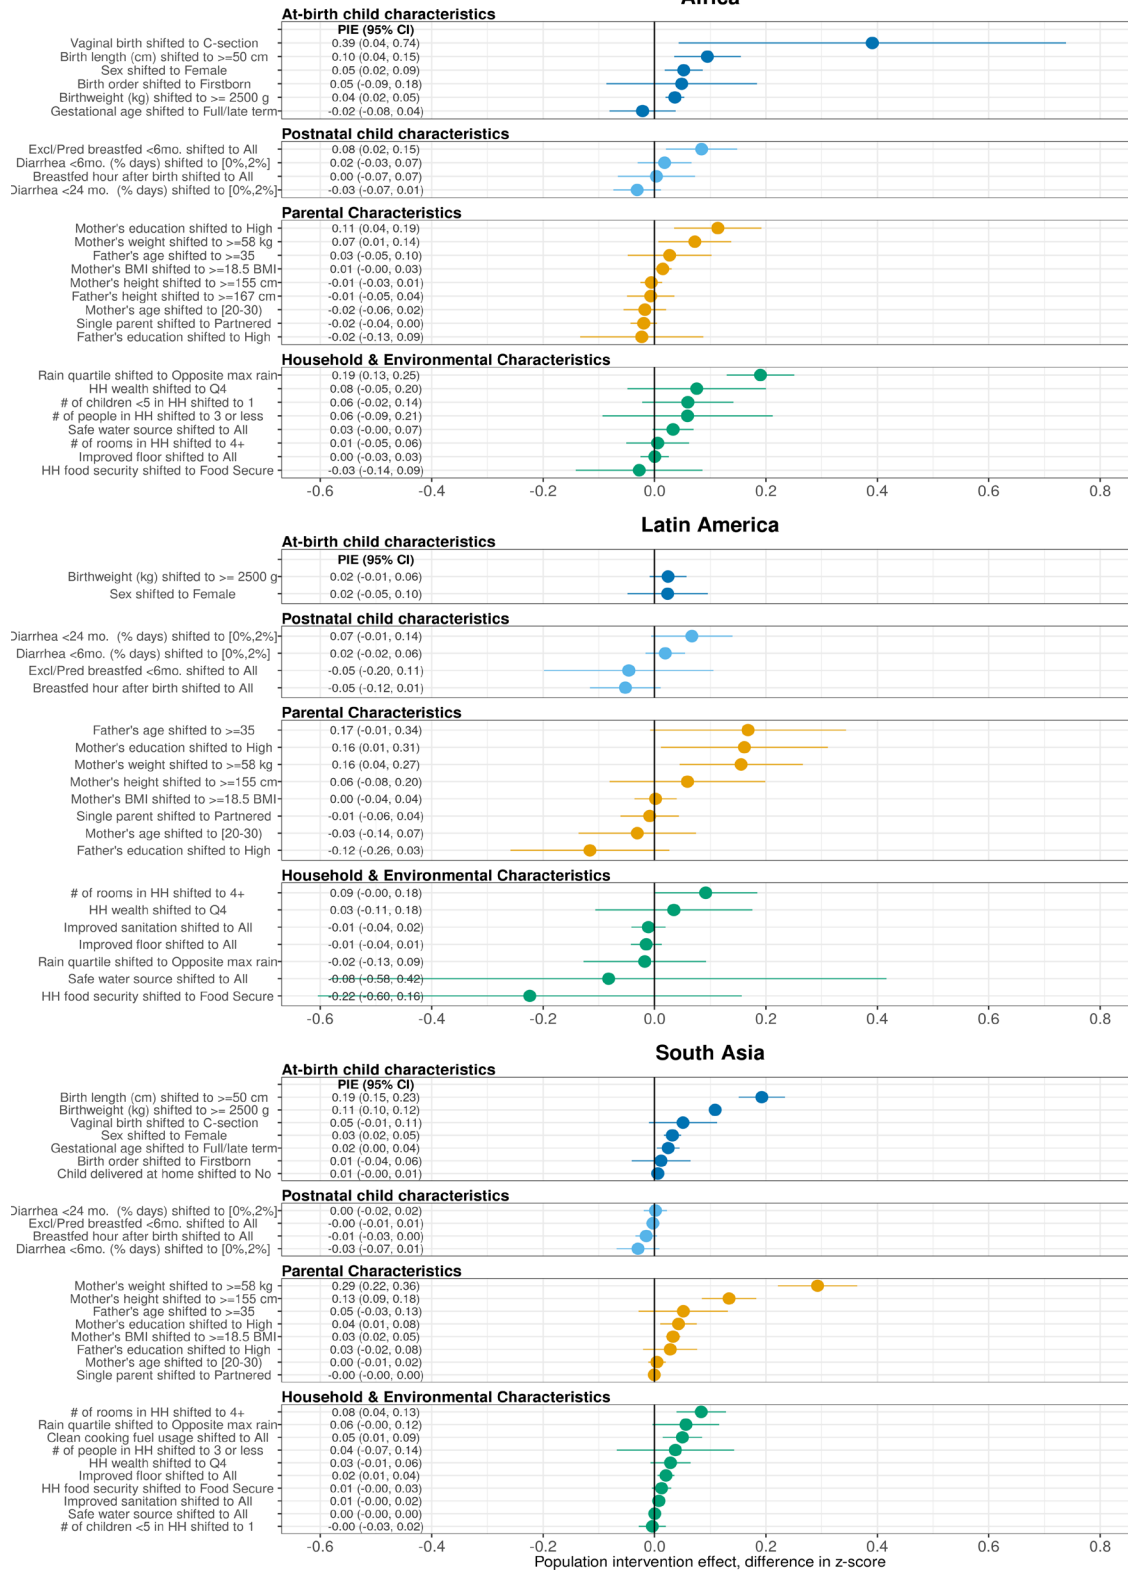

Region-stratified population attributable differences in weight-for-length Z-scores estimated using fixed effects.



## Supplementary Note 4. Comparison of Adjusted and Unadjusted Population Intervention Effects

Plots comparing covariate-adjusted population intervention effect estimates (the estimates presented in Figures 2 and 3) compared to estimates not adjusted for potential confounders laid out in Table 1.4.

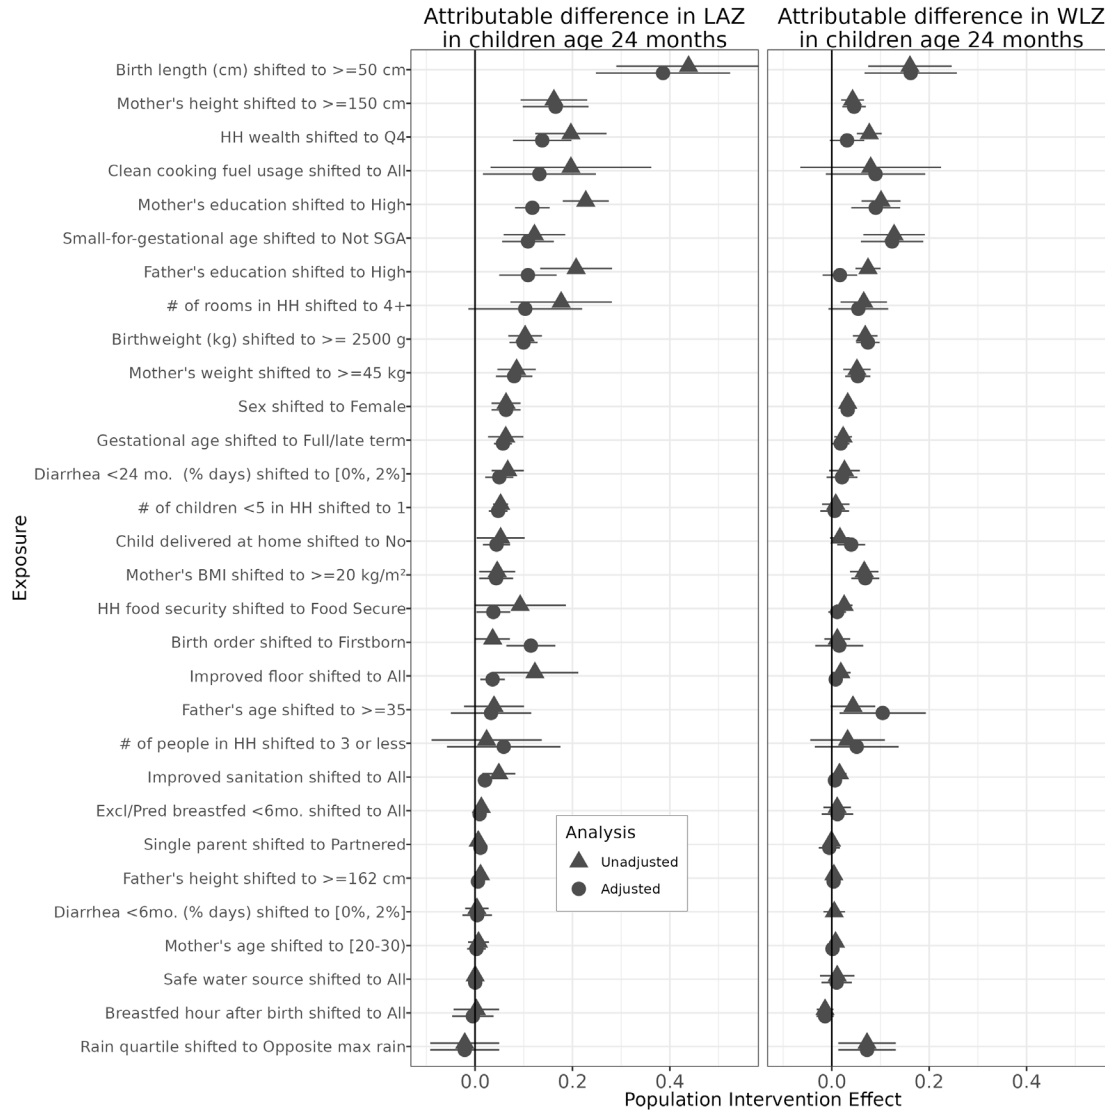

## Supplementary Note 5. Spline plots: all exposures

Spline plots of HAZ and WHZ over the first two years of children's lives, stratified by levels of risk factors. Plots were constructed using the same methods as for Figures 4a and 4b for all risk factors (details in the Methods section).



**Spline curves of LAZ stratified by levels of exposure: Birth length (cm)**

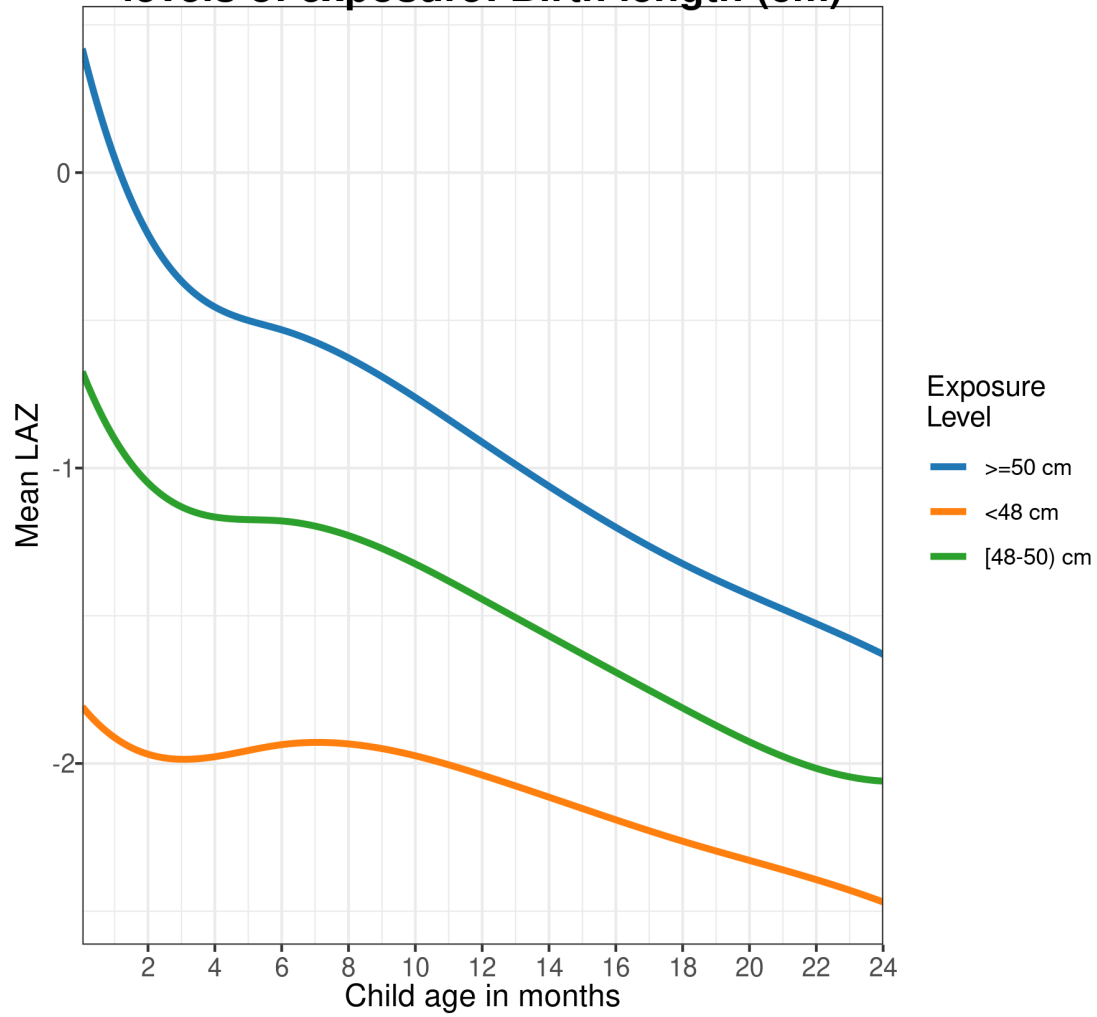

**Spline curves of LAZ stratified by levels of exposure: Birthweight (kg)**

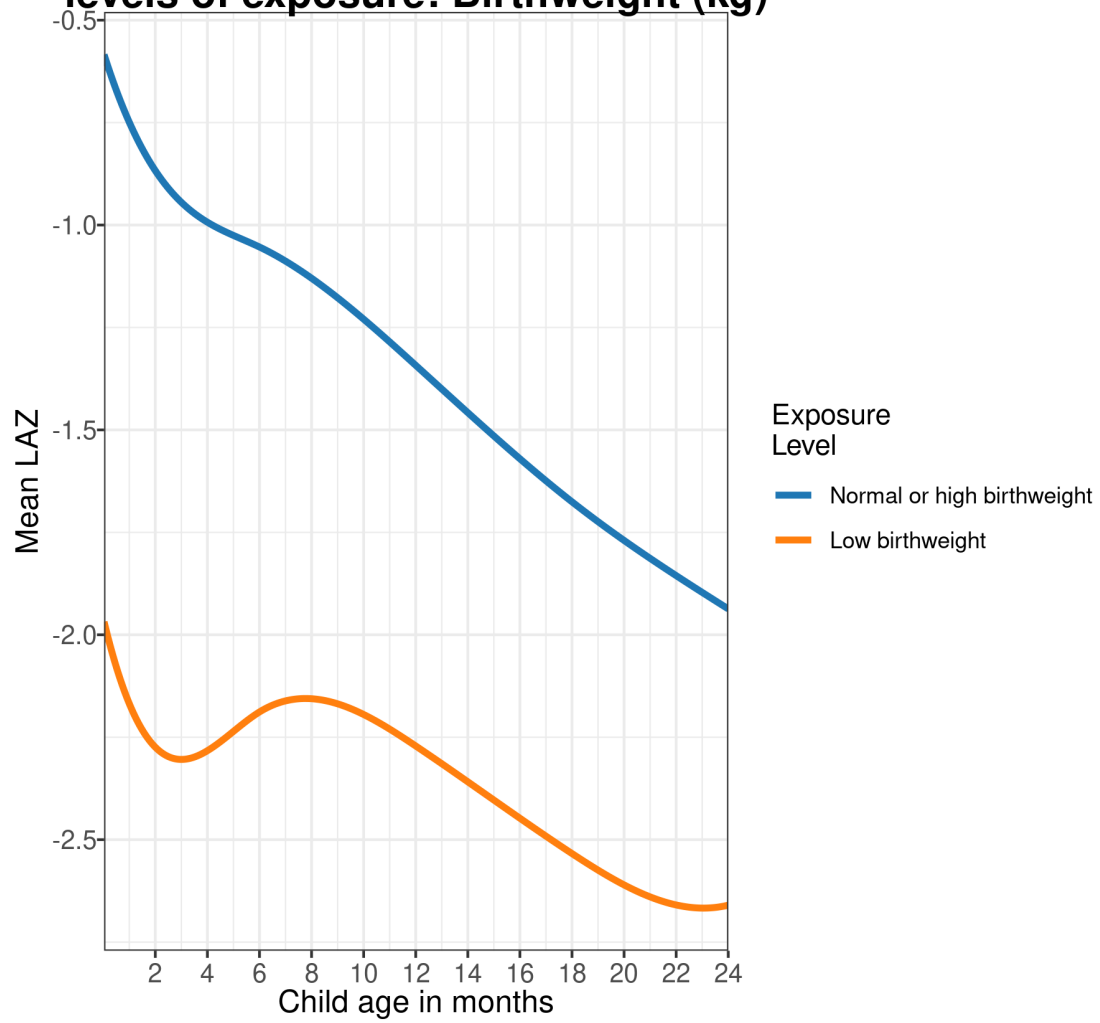

**Spline curves of LAZ stratified by levels of exposure: Clean cooking fuel usage**

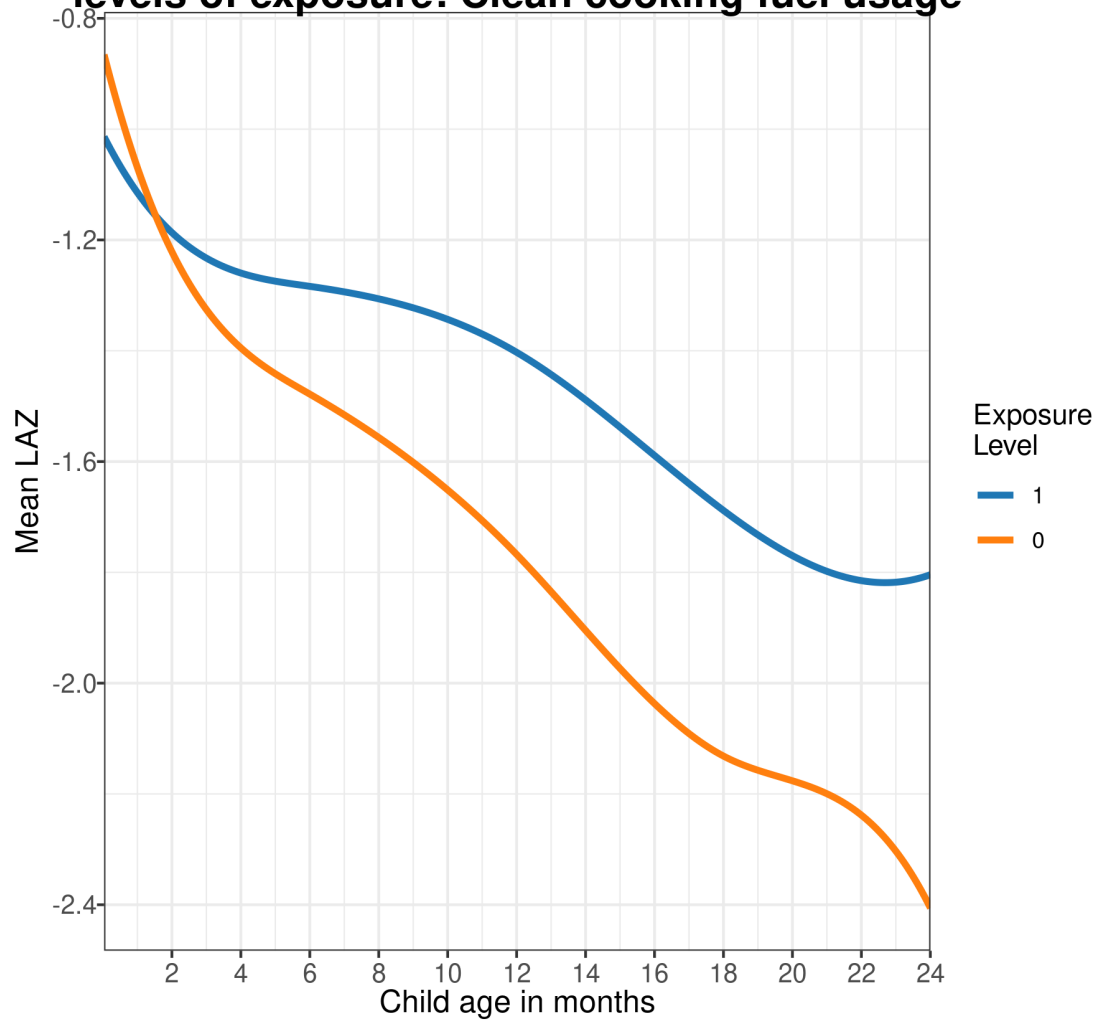

**Spline curves of LAZ stratified by levels of exposure: Breastfed hour after birth**

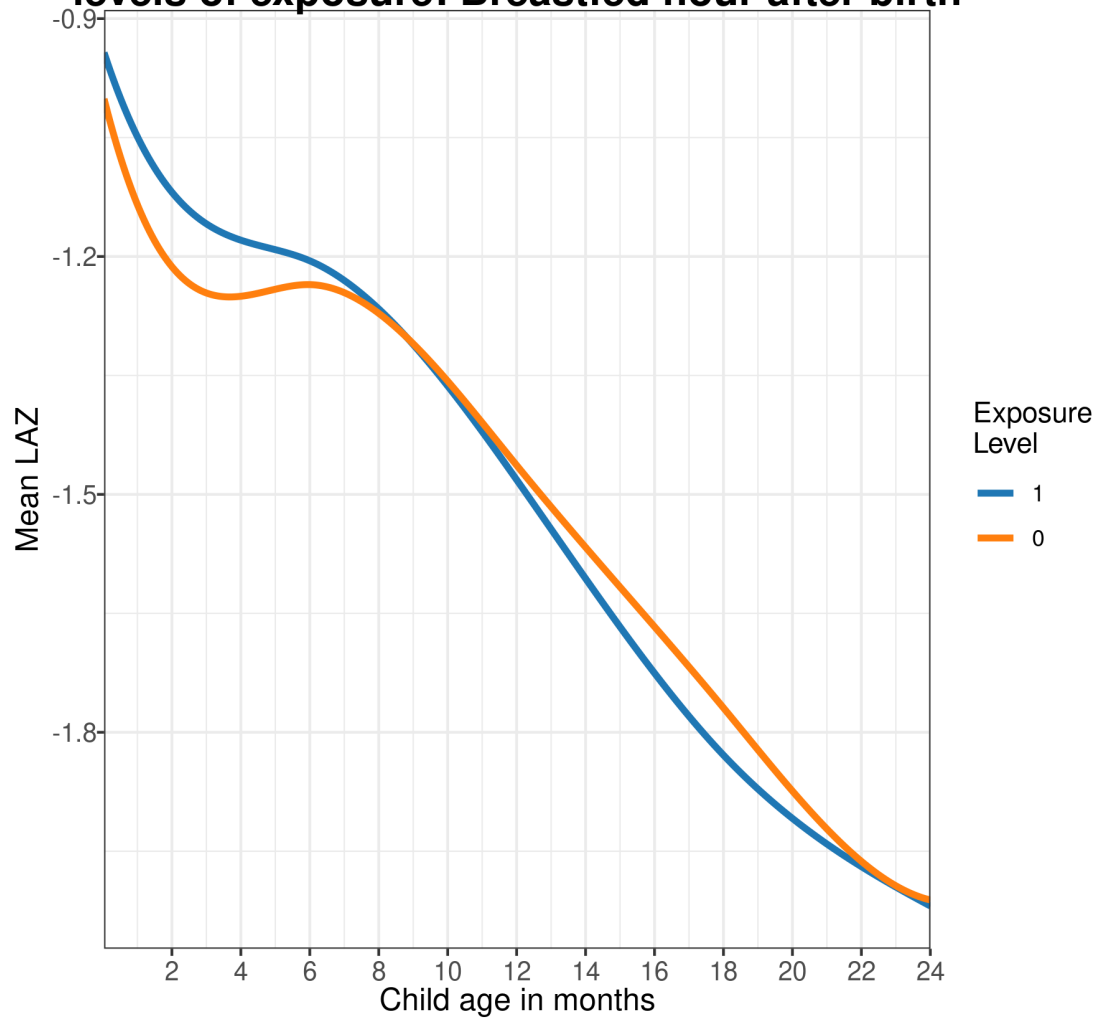

### Spline curves of LAZ stratified by levels of exposure: Enrolled stunted

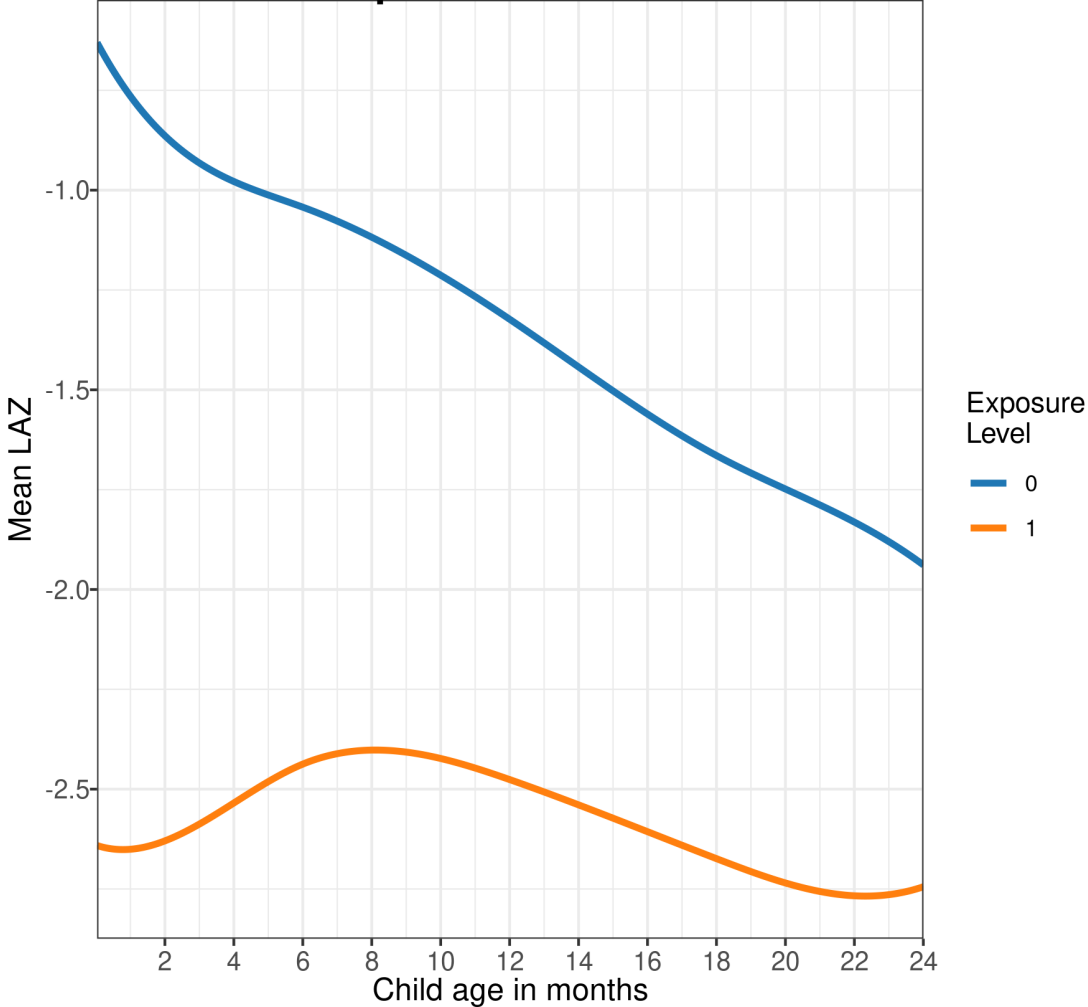

**Spline curves of LAZ stratified by levels of exposure: Enrolled wasted**

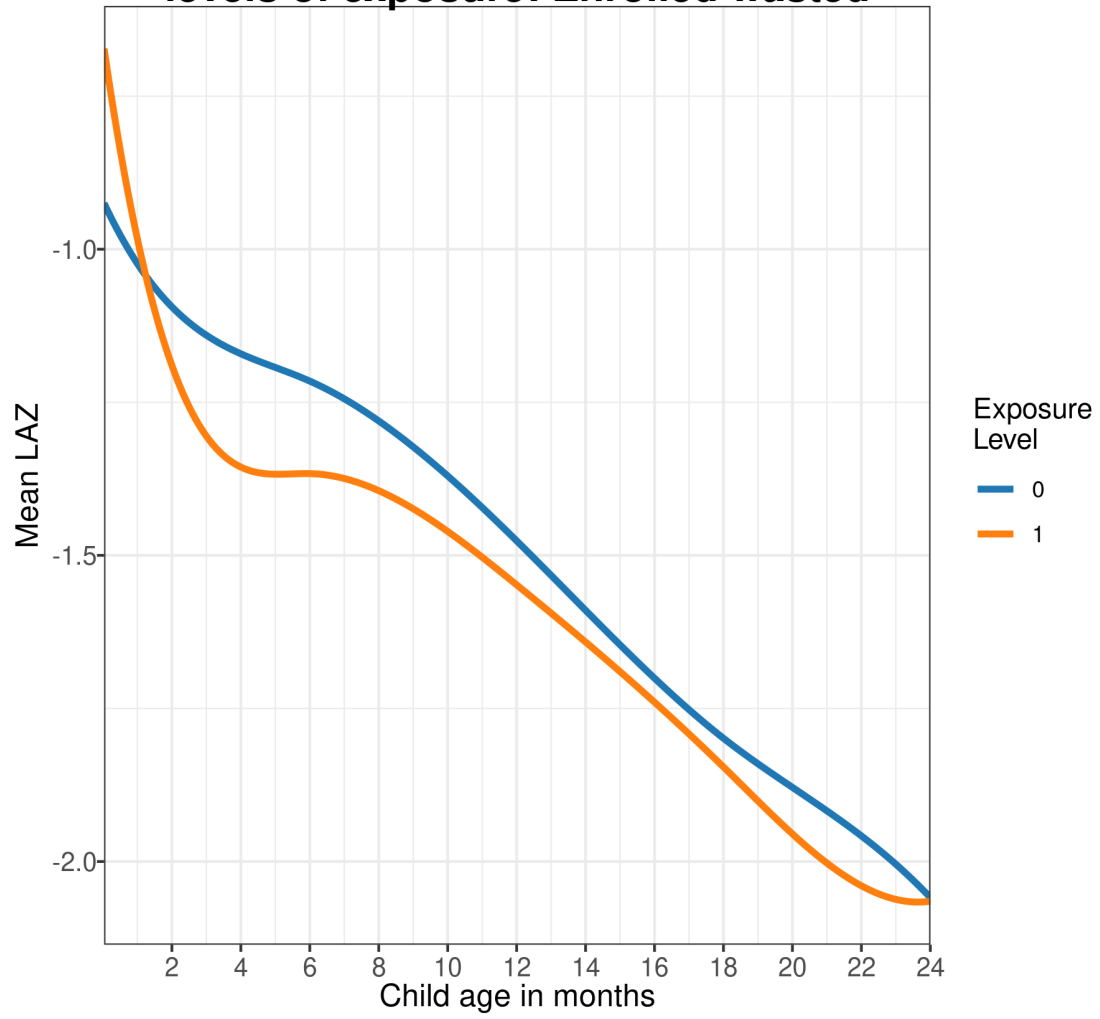

### Spline curves of LAZ stratified by levels of exposure: Father's age

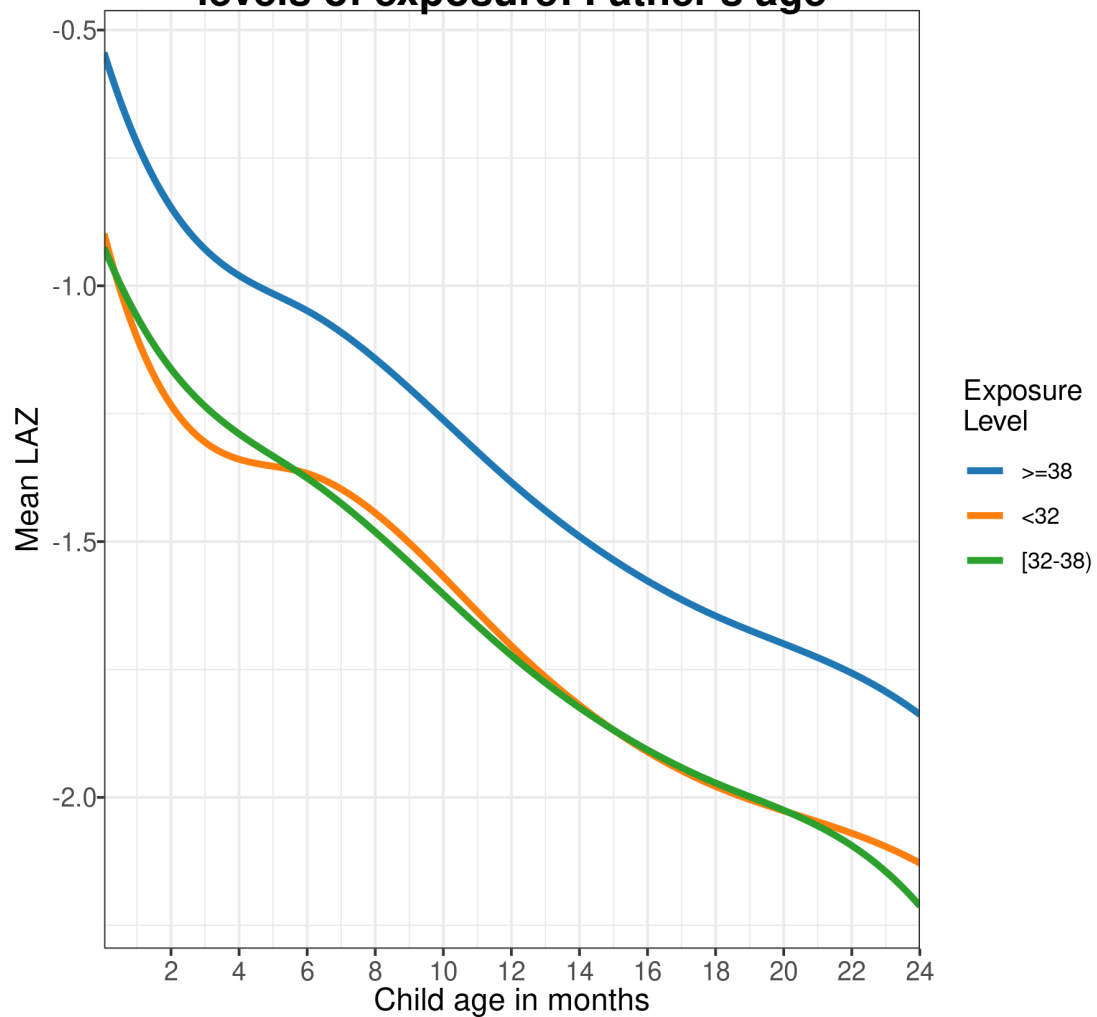

**Spline curves of LAZ stratified by levels of exposure: Father's education**

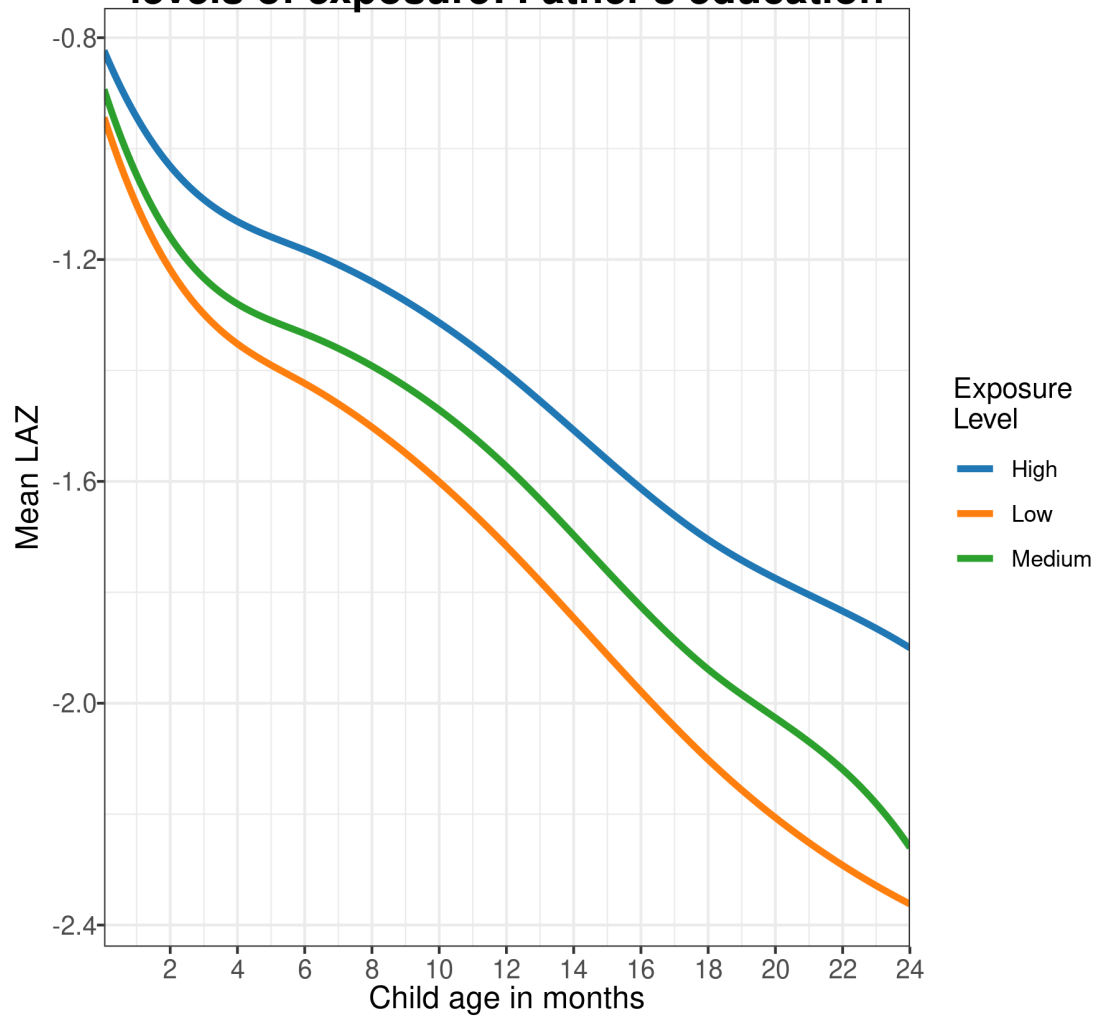



**Spline curves of LAZ stratified by levels of exposure: Father's height**

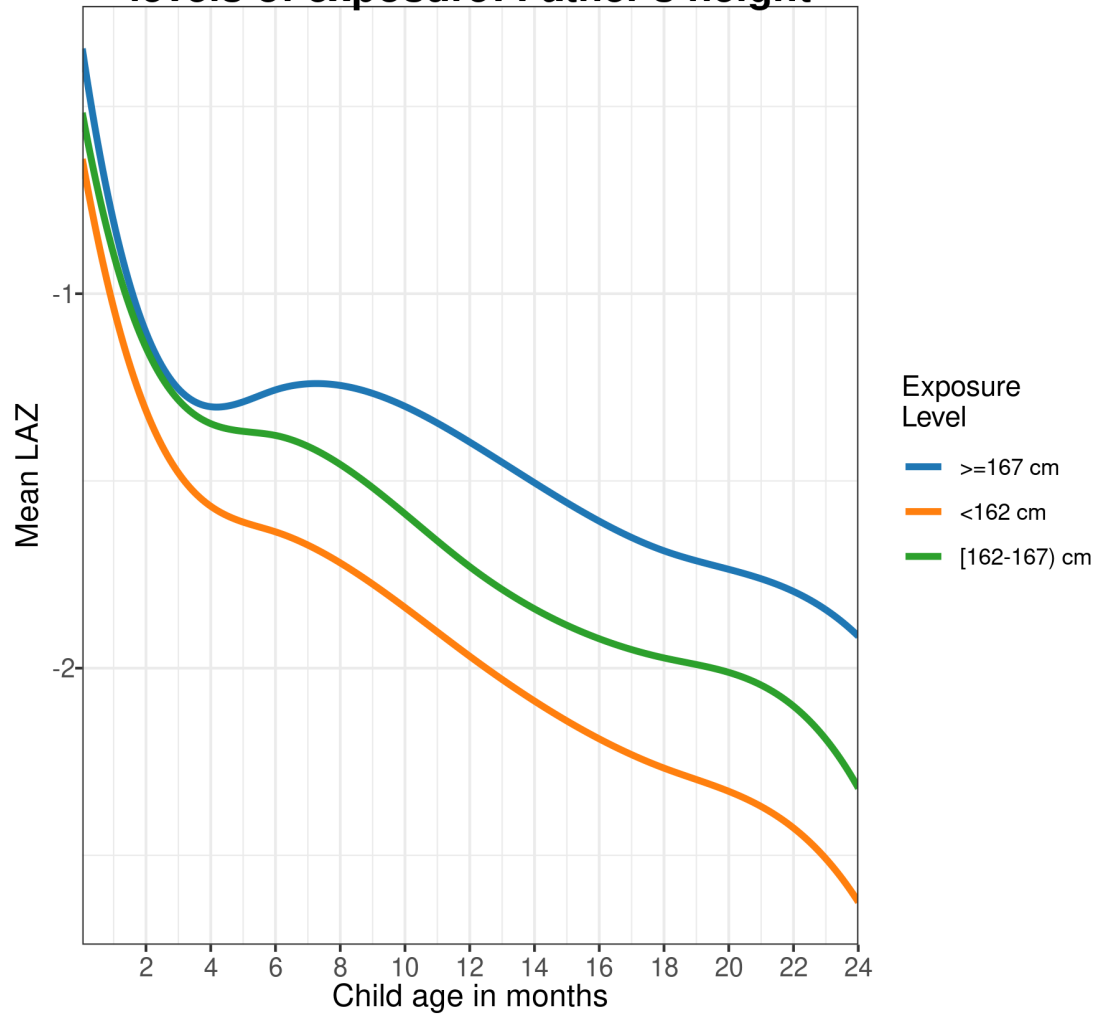

# Spline curves of LAZ stratified by levels of exposure: Gestational age at birth

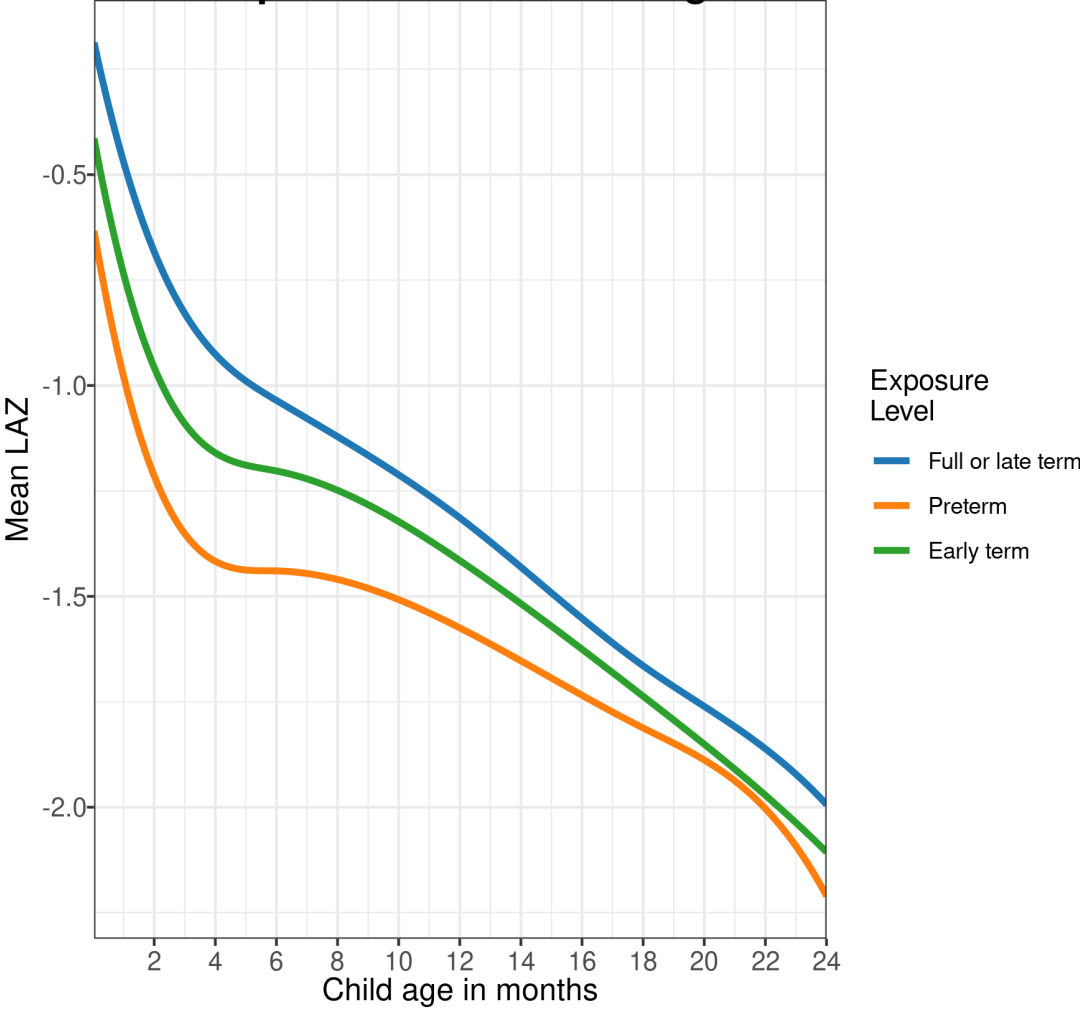

### Spline curves of LAZ stratified by levels of exposure: Child delivered at home

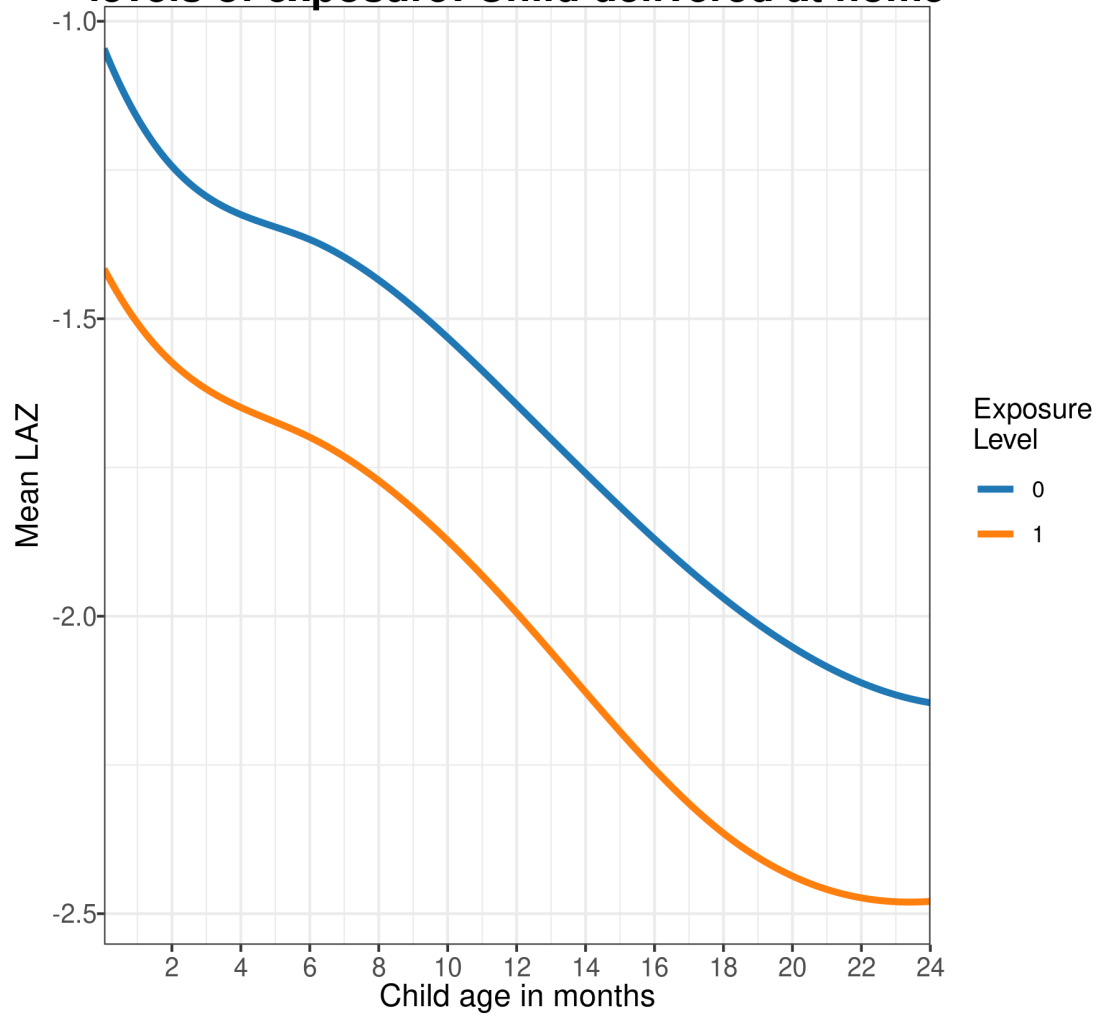

### Spline curves of LAZ stratified by levels of exposure: HH food security

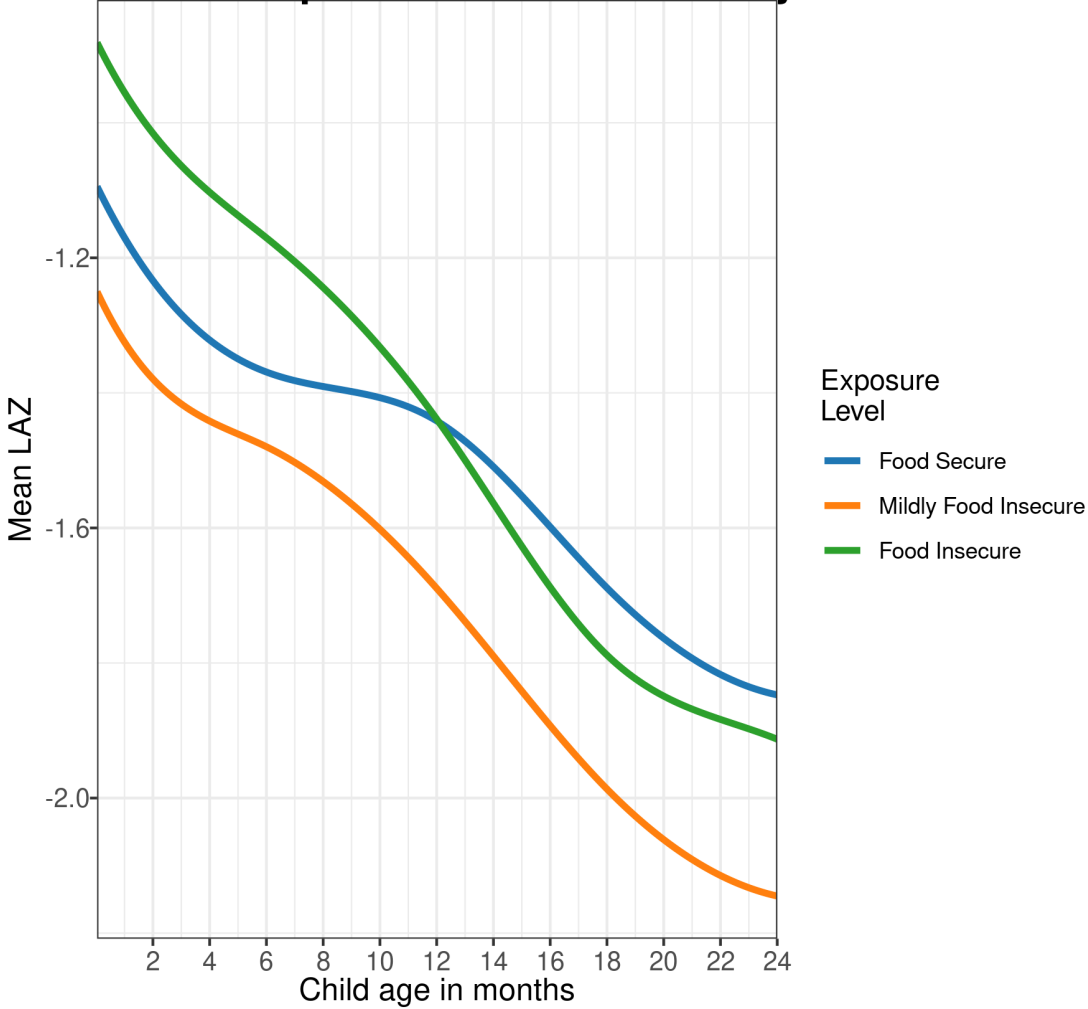

**Spline curves of LAZ stratified by levels of exposure: HH wealth**

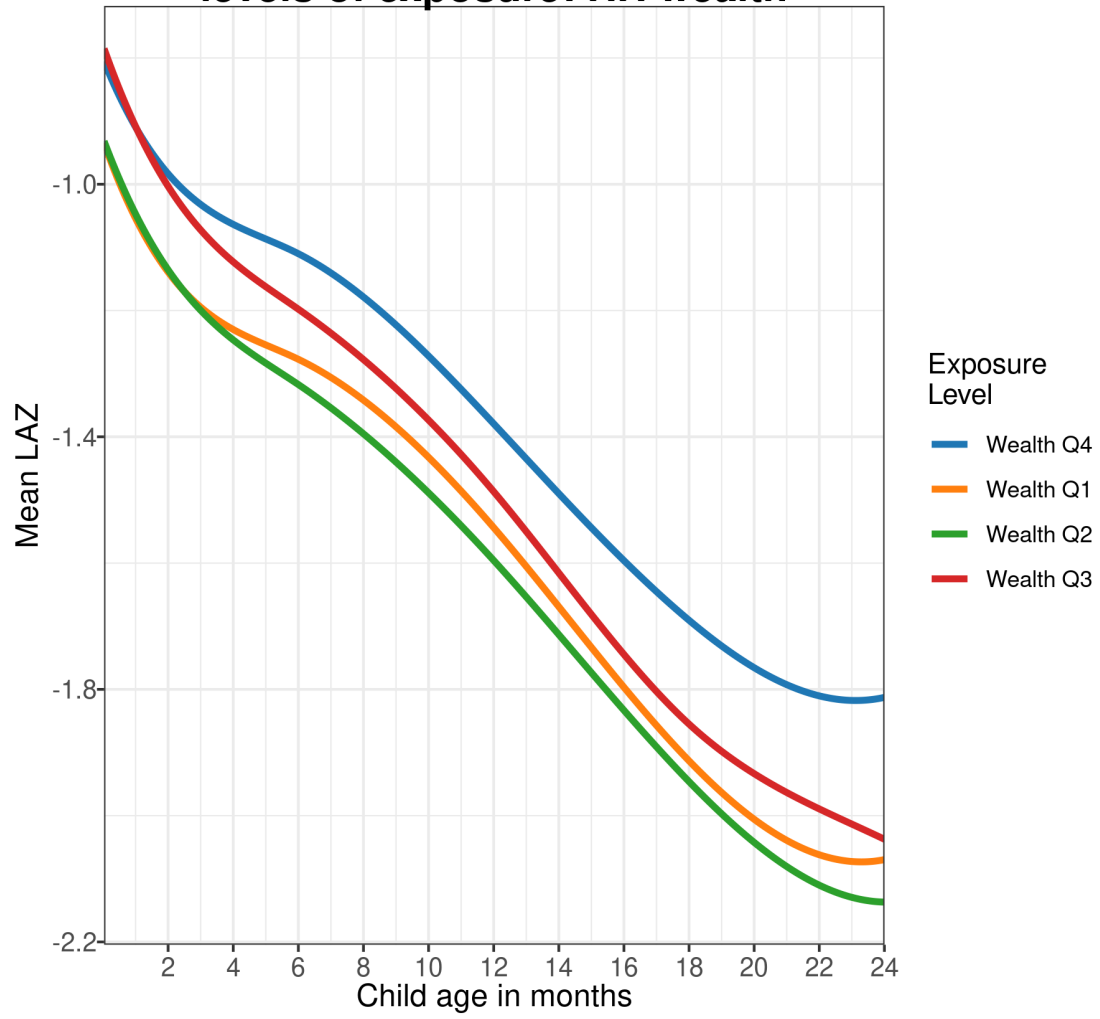

### Spline curves of LAZ stratified by levels of exposure: Improved floor

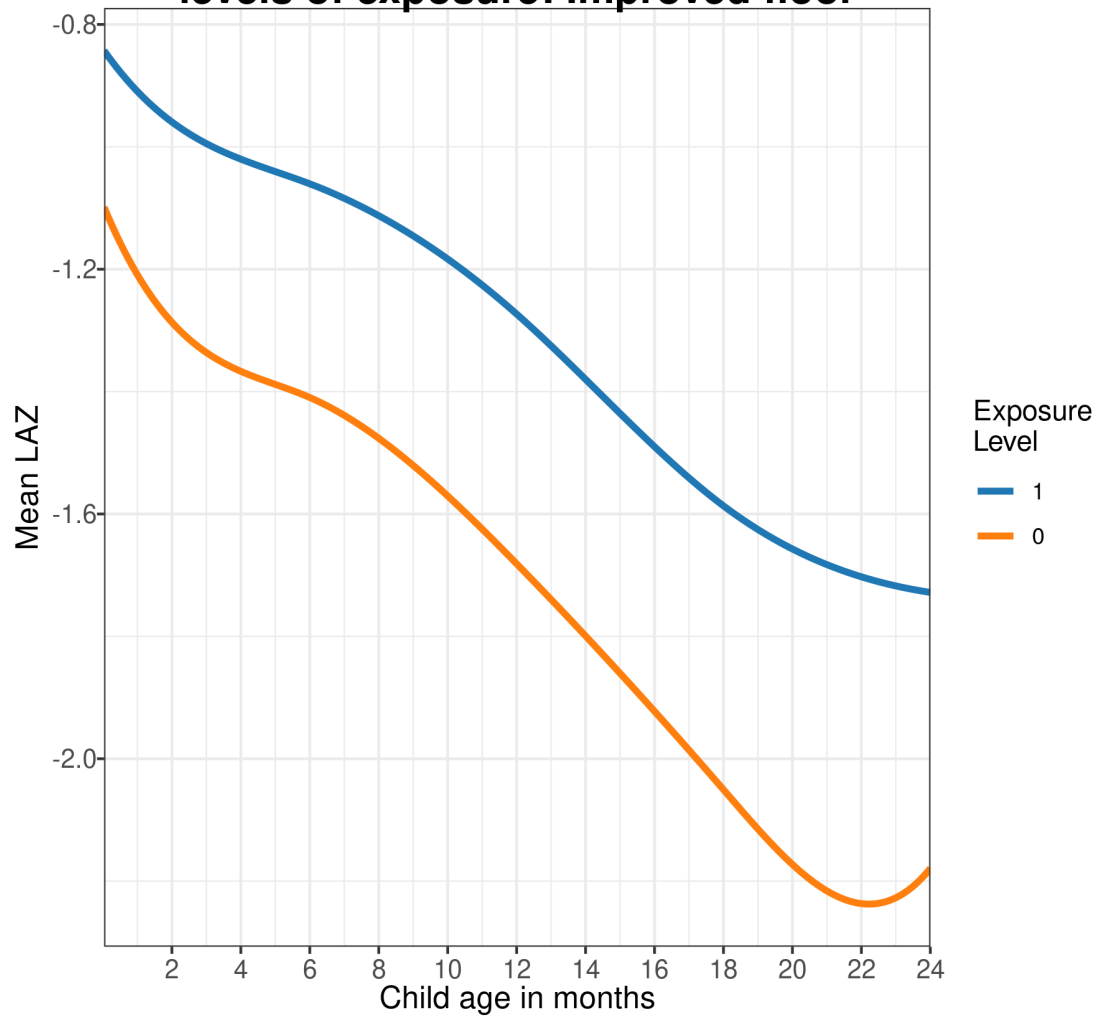

### Spline curves of LAZ stratified by levels of exposure: Improved sanitation

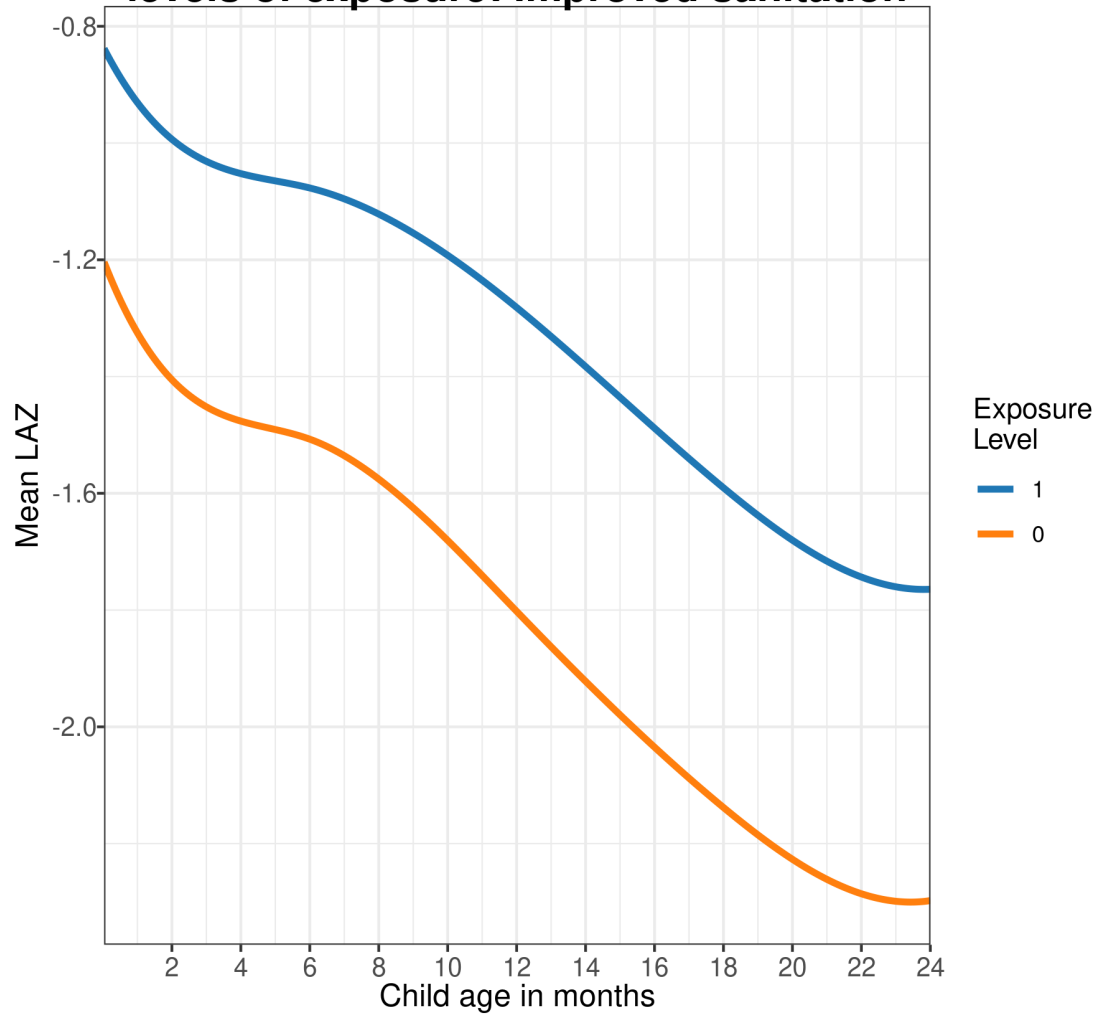

### Spline curves of LAZ stratified by levels of exposure: Mother's age

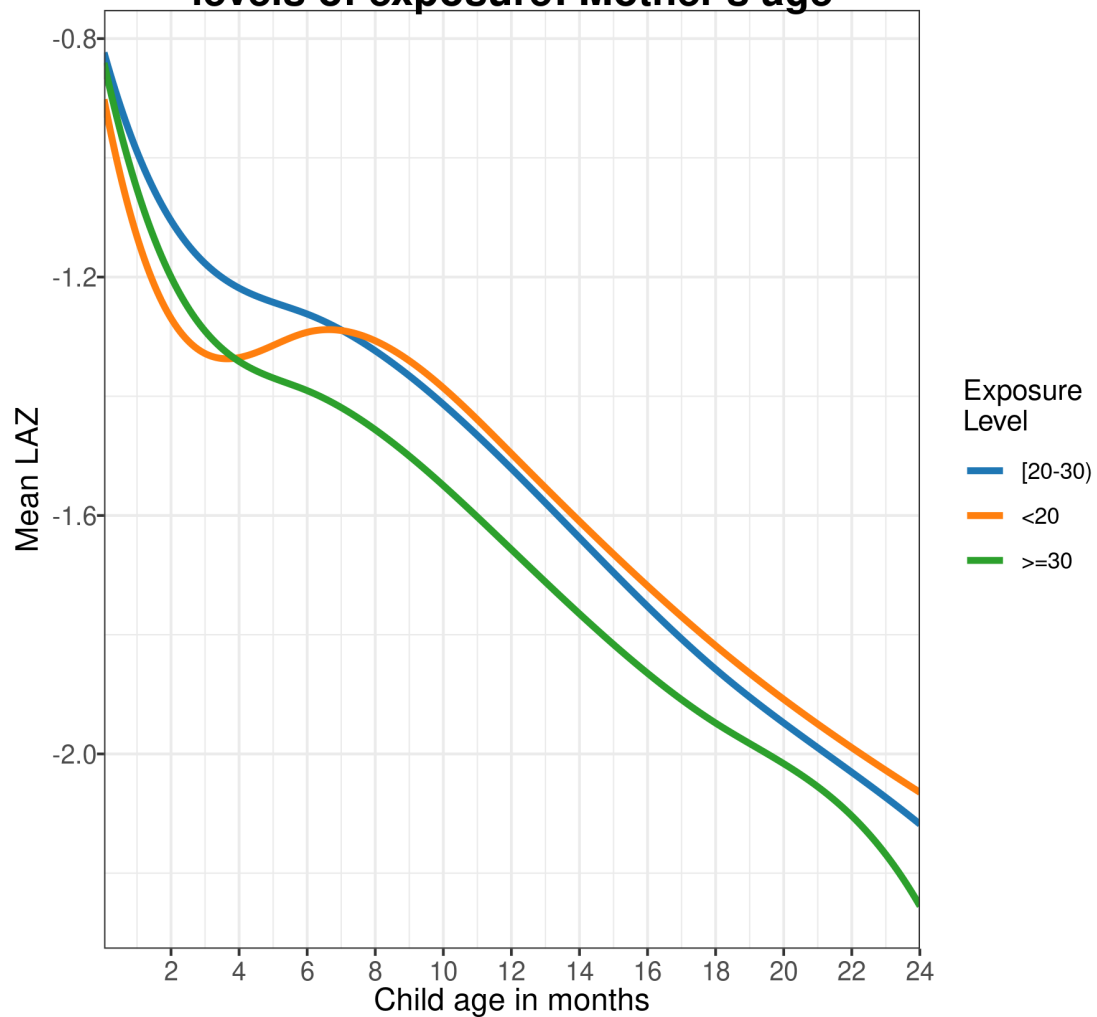



**Spline curves of LAZ stratified by levels of exposure: Mother's education**

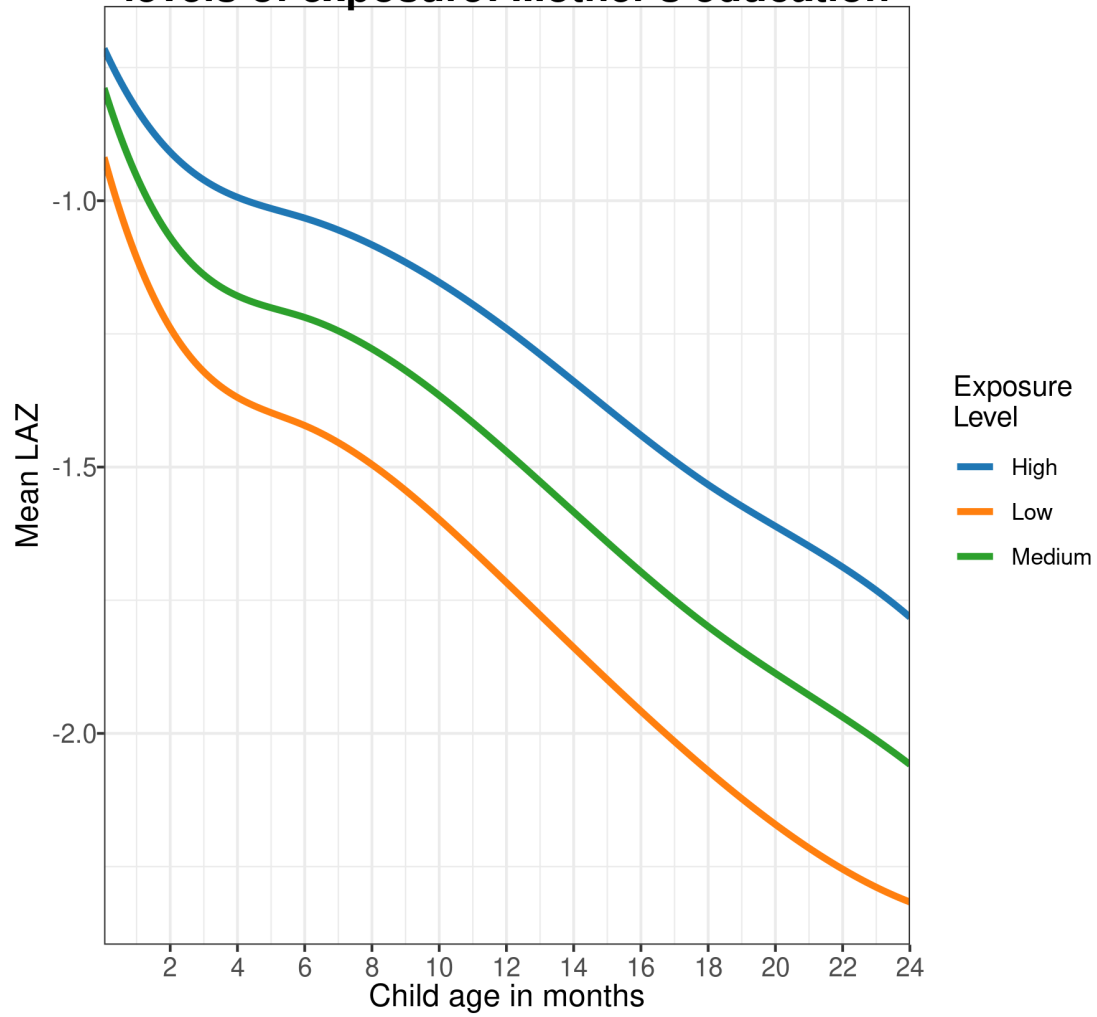

**Spline curves of LAZ stratified by levels of exposure: # of children <5 in HH**

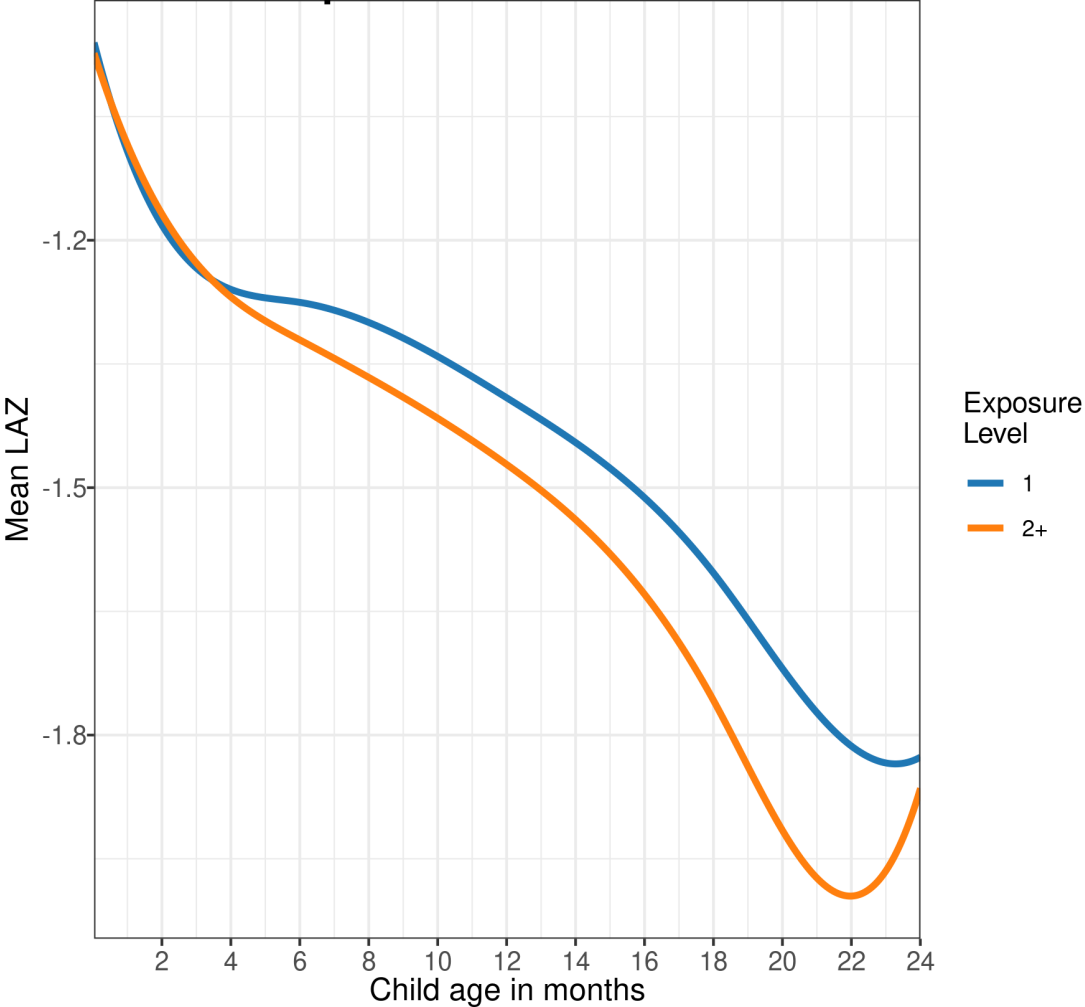

**Spline curves of LAZ stratified by levels of exposure: # of people in HH**

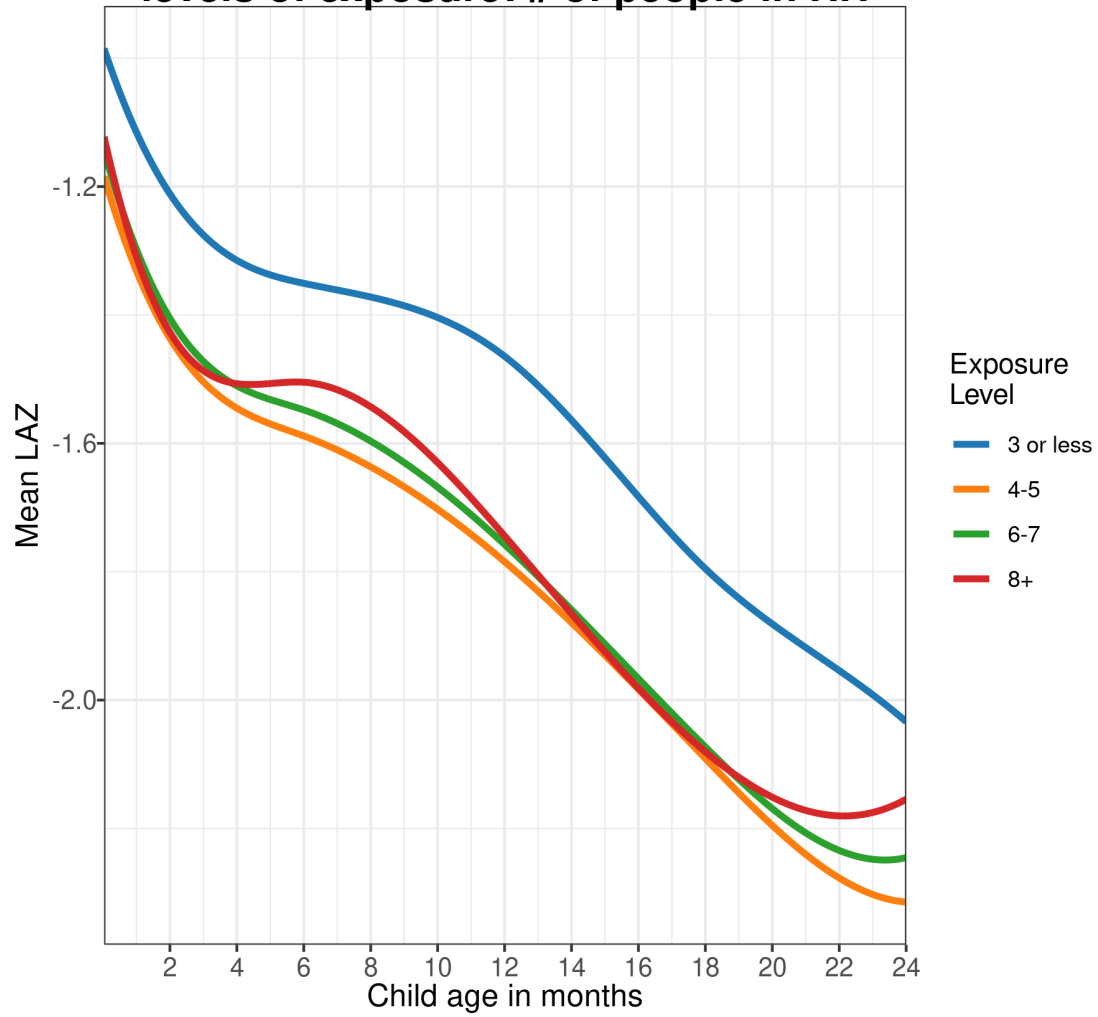

**Spline curves of LAZ stratified by levels of exposure: # of rooms in HH**

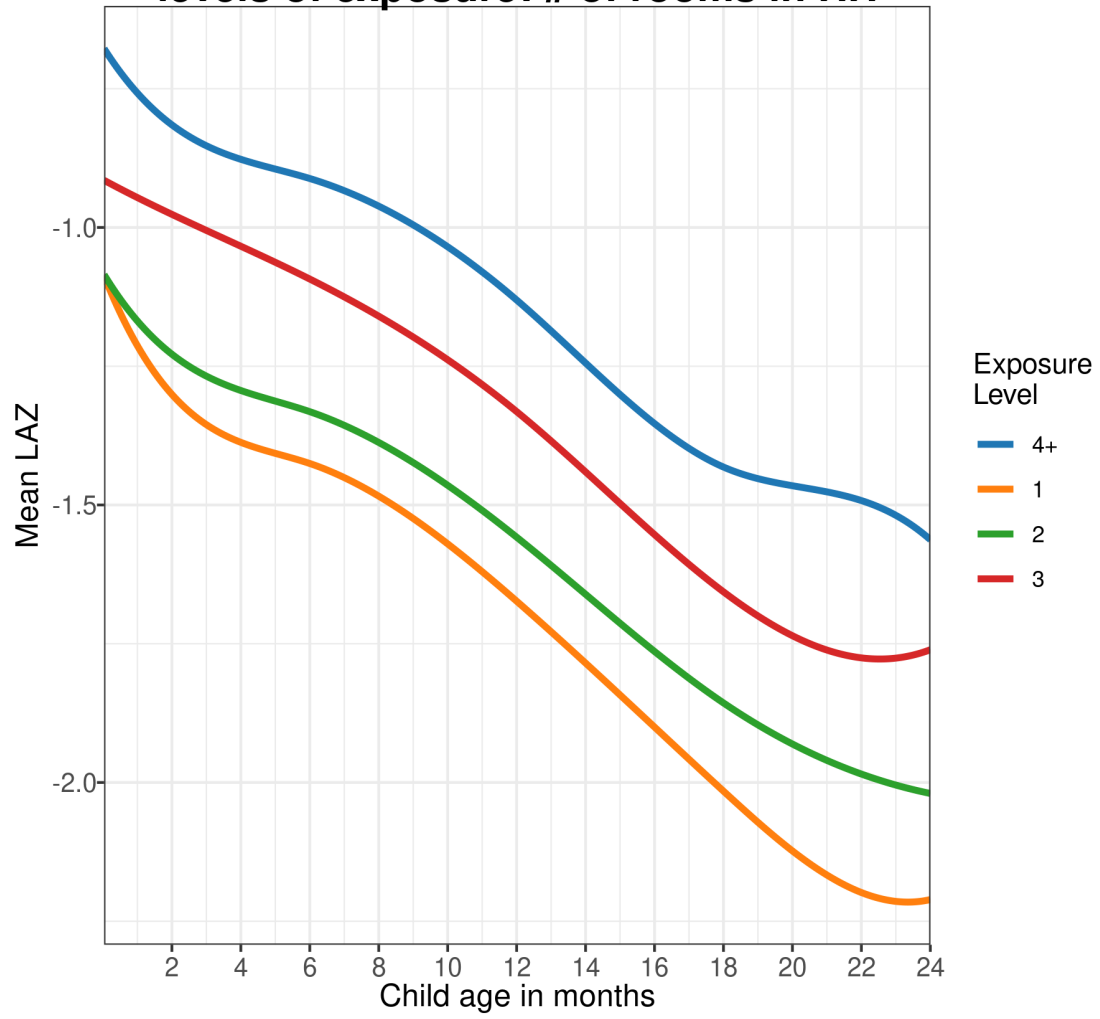

**Spline curves of LAZ stratified by levels of exposure: Birth order**

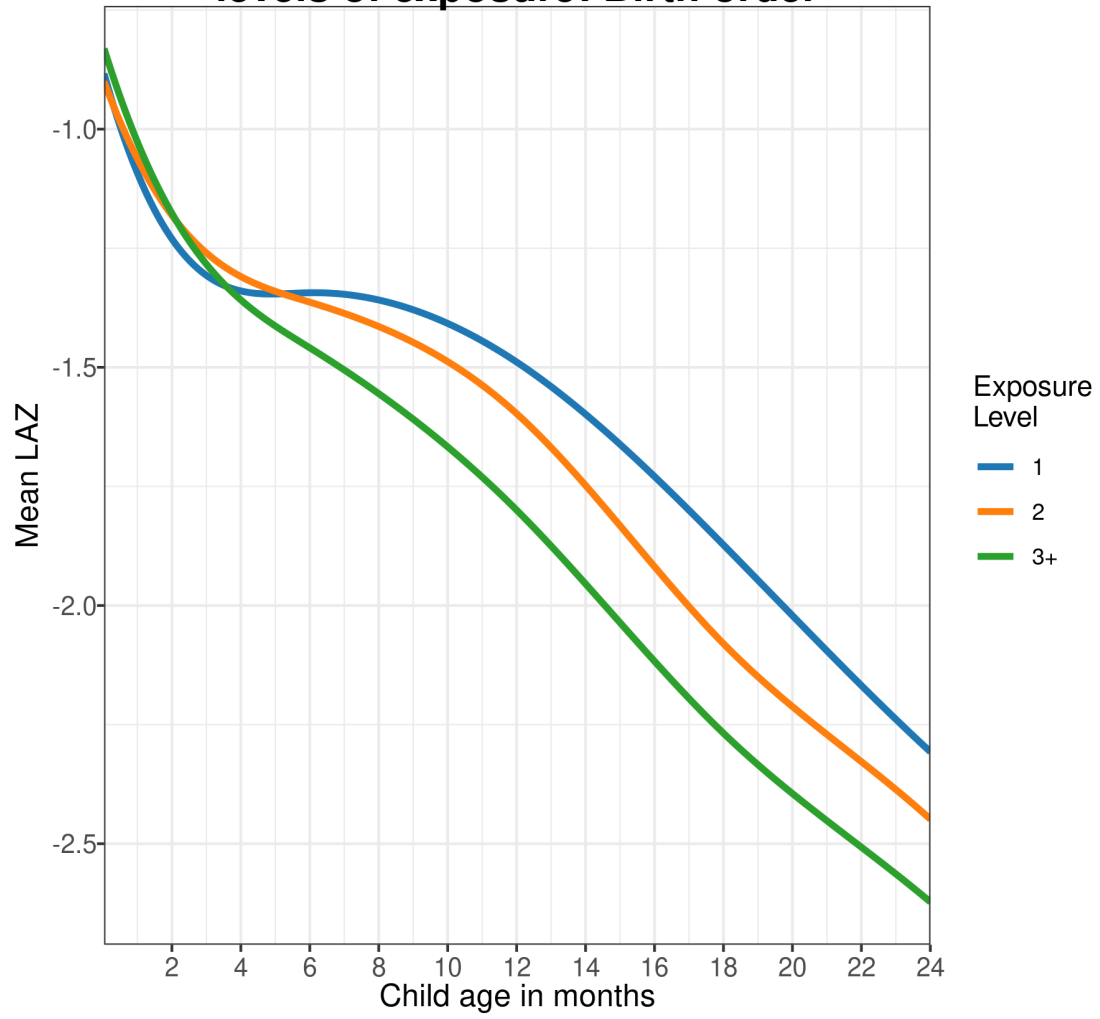

### Spline curves of LAZ stratified by levels of exposure: Diarrhea <6 mo. (% days)

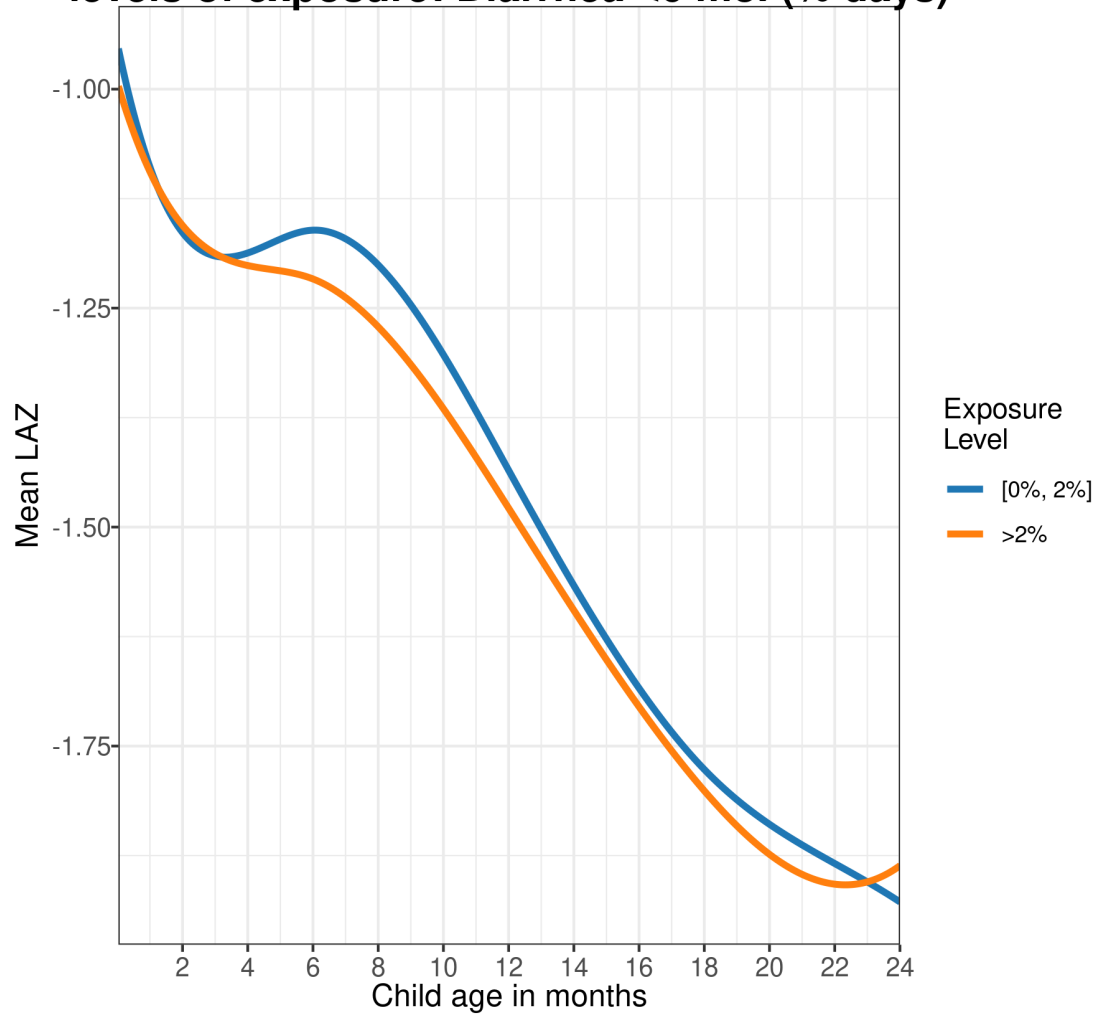

**Spline curves of LAZ stratified by levels of exposure: Diarrhea <24 mo. (% days)**

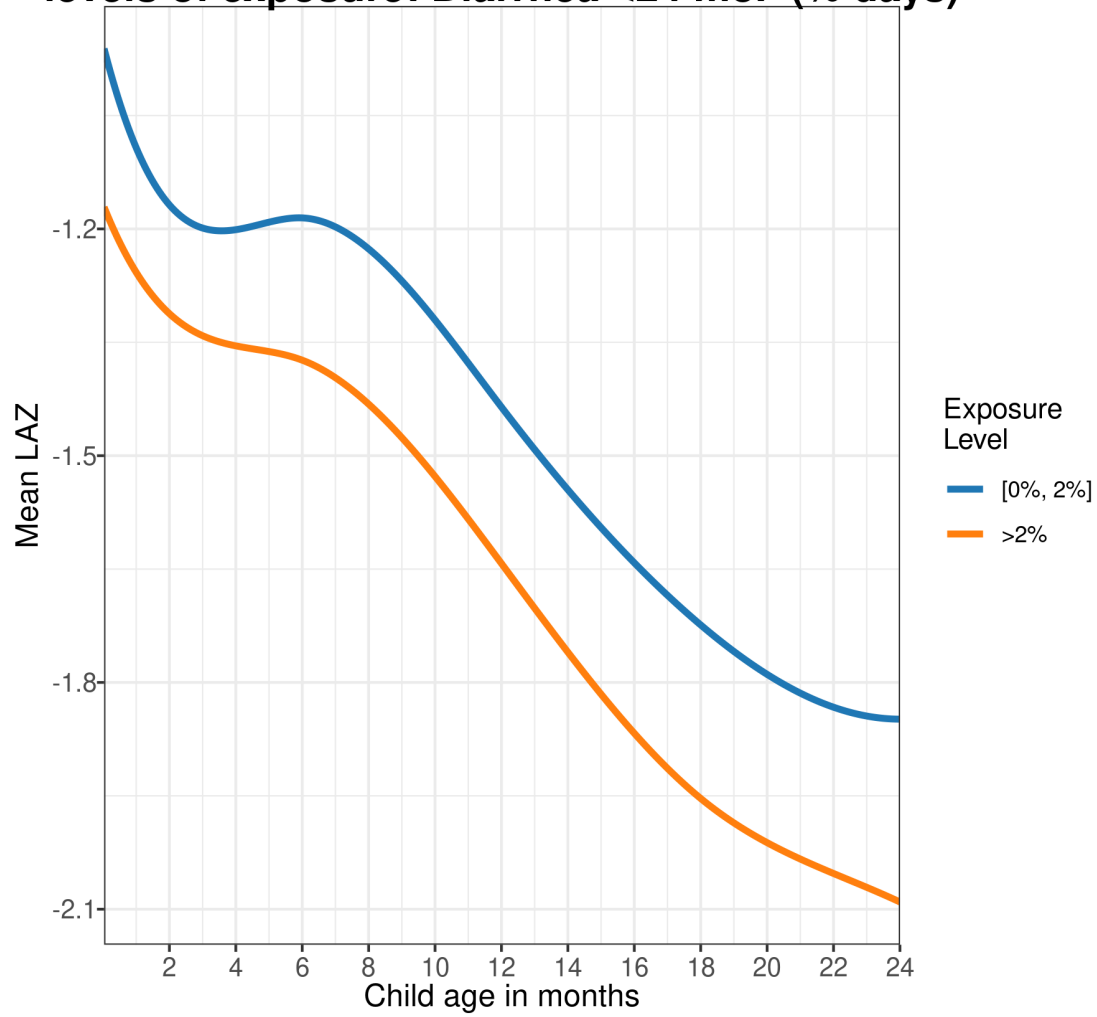

**Spline curves of LAZ stratified by levels of exposure: Persistent wasting <6 mo.**

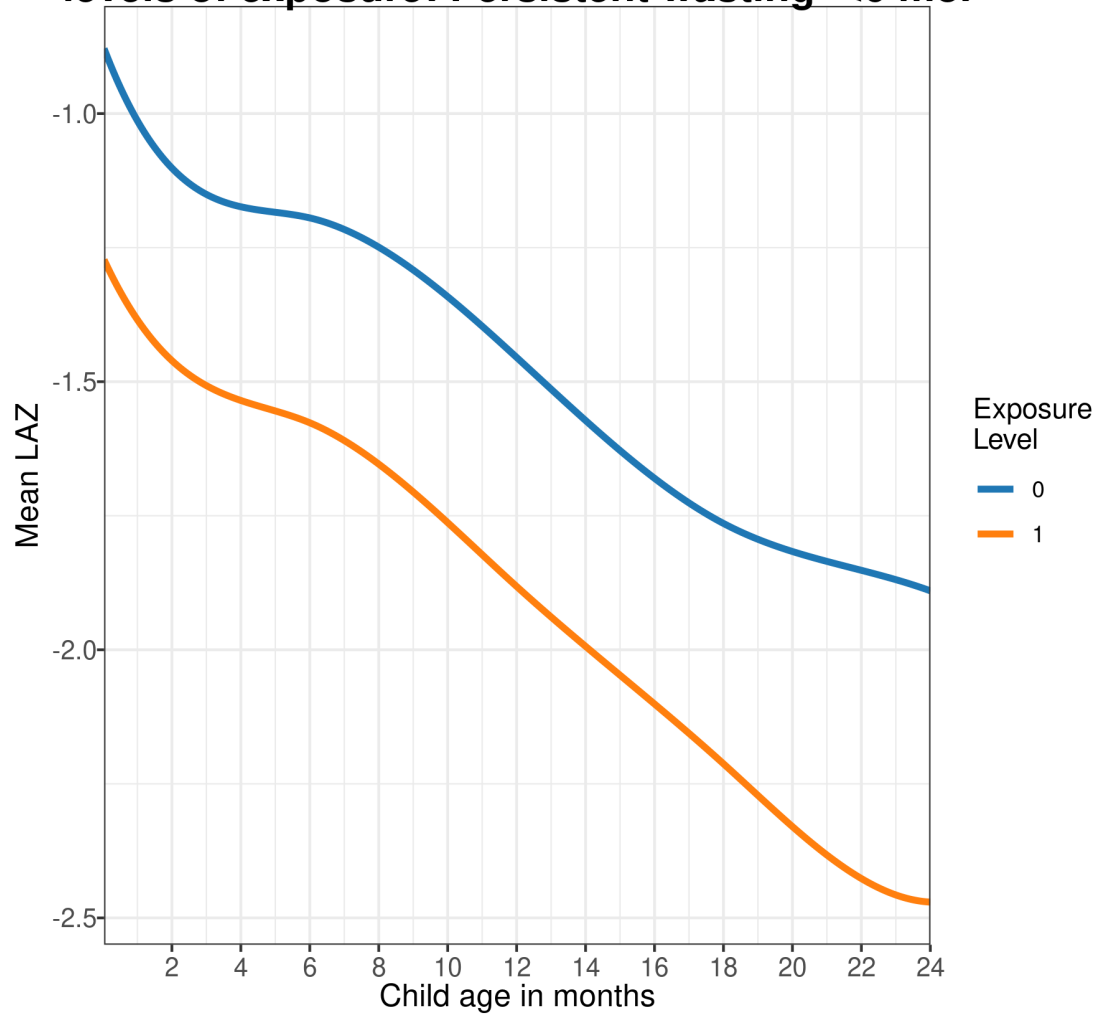



**Spline curves of LAZ stratified by levels of exposure: Excl/Pred breastfed <6mo.**

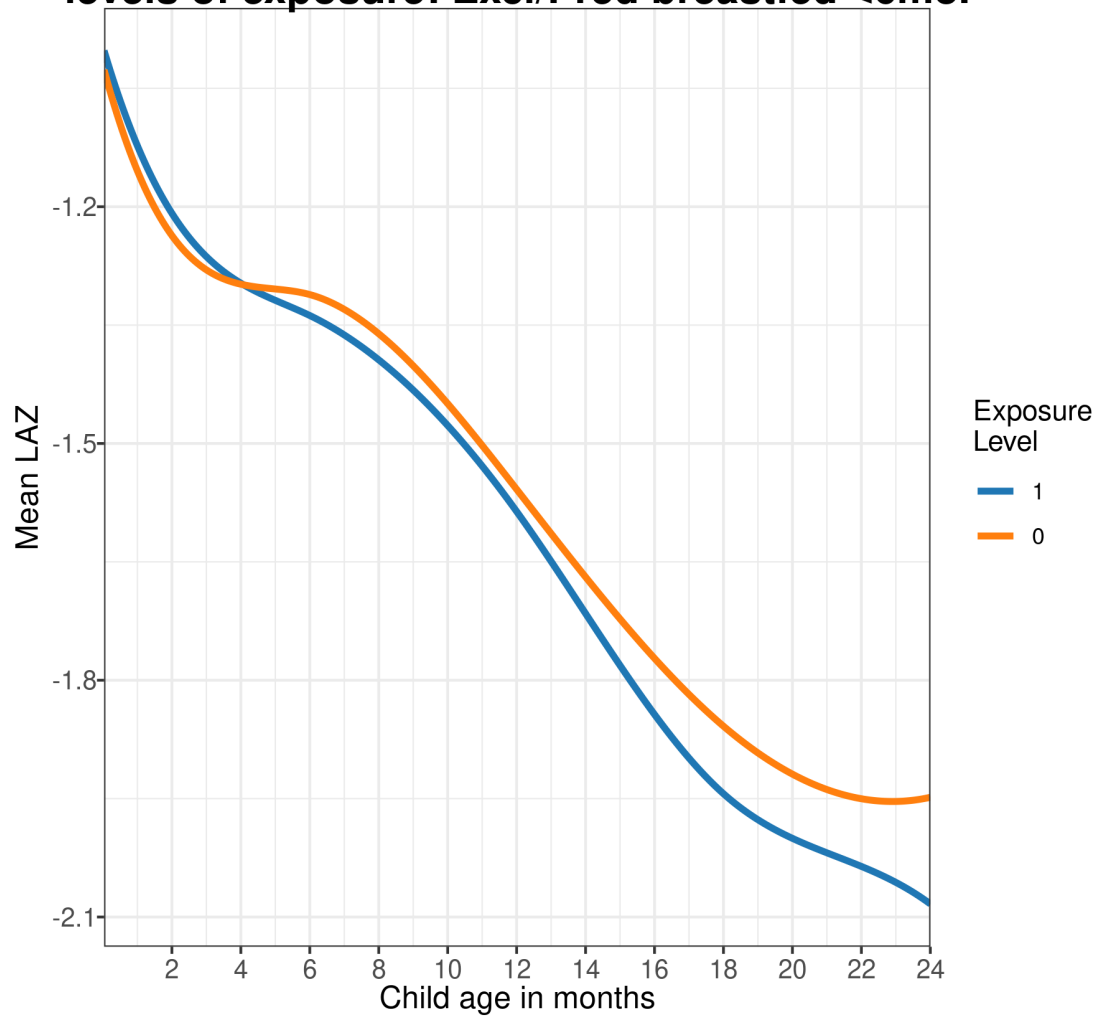

**Spline curves of LAZ stratified by levels of exposure: Safe water source**

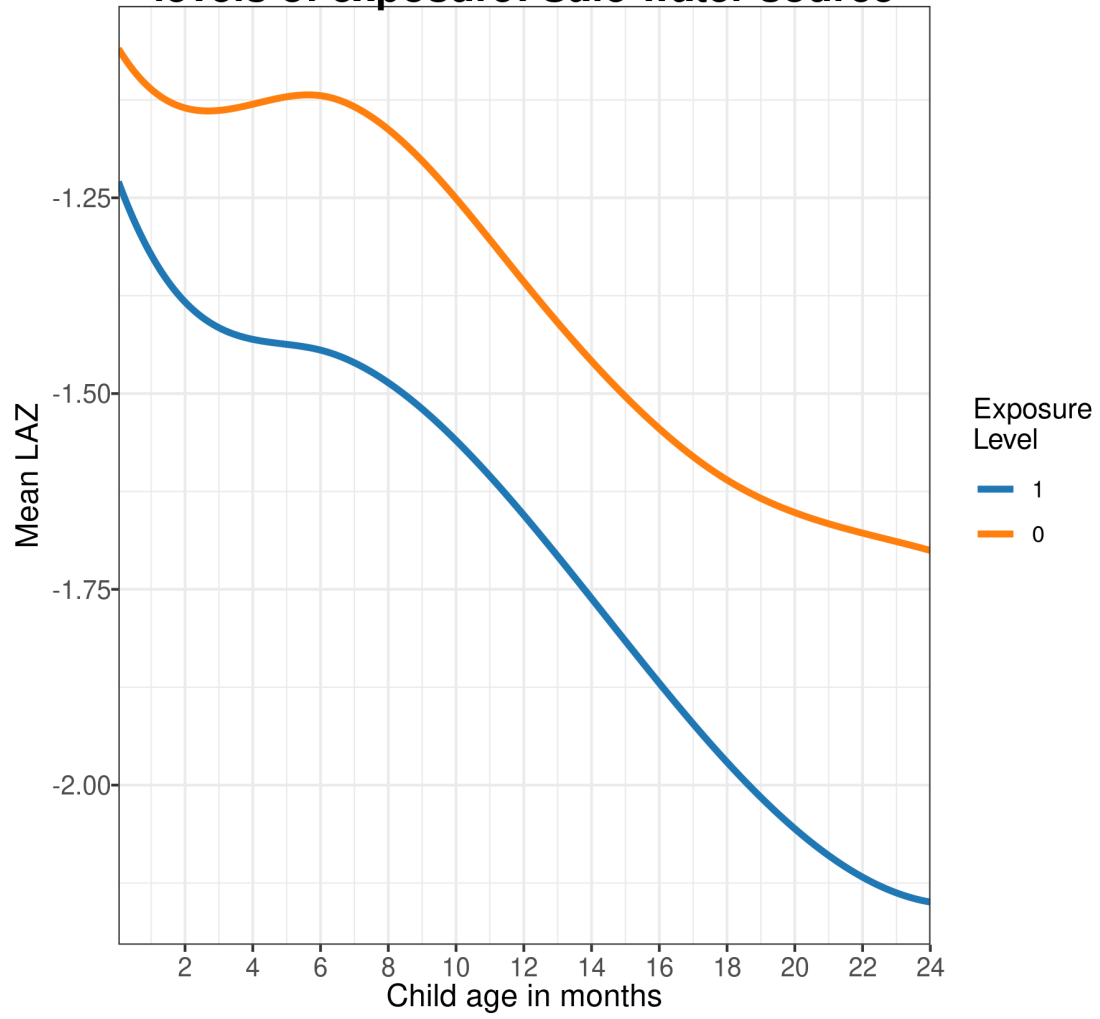

### Spline curves of LAZ stratified by levels of exposure: Sex

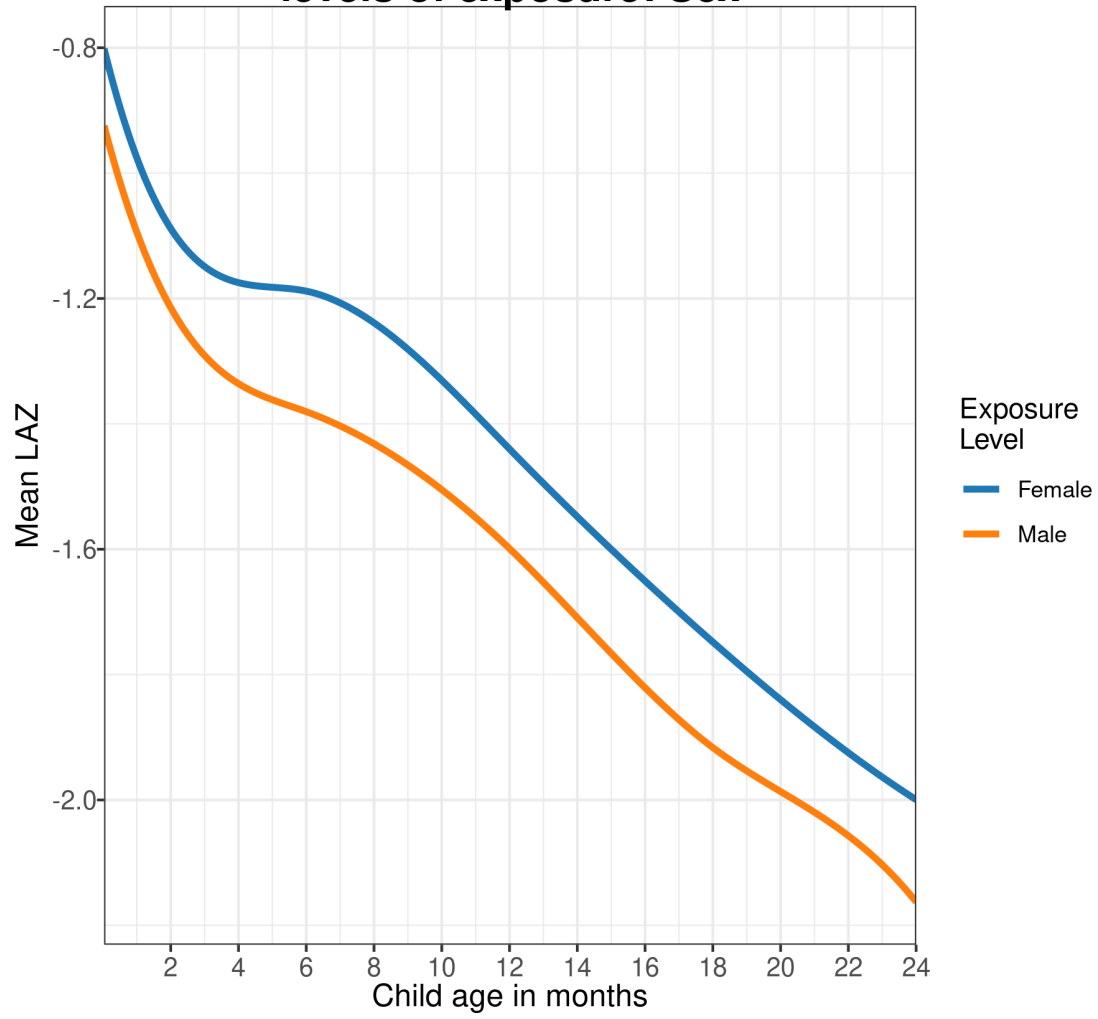

### Spline curves of LAZ stratified by levels of exposure: Single parent

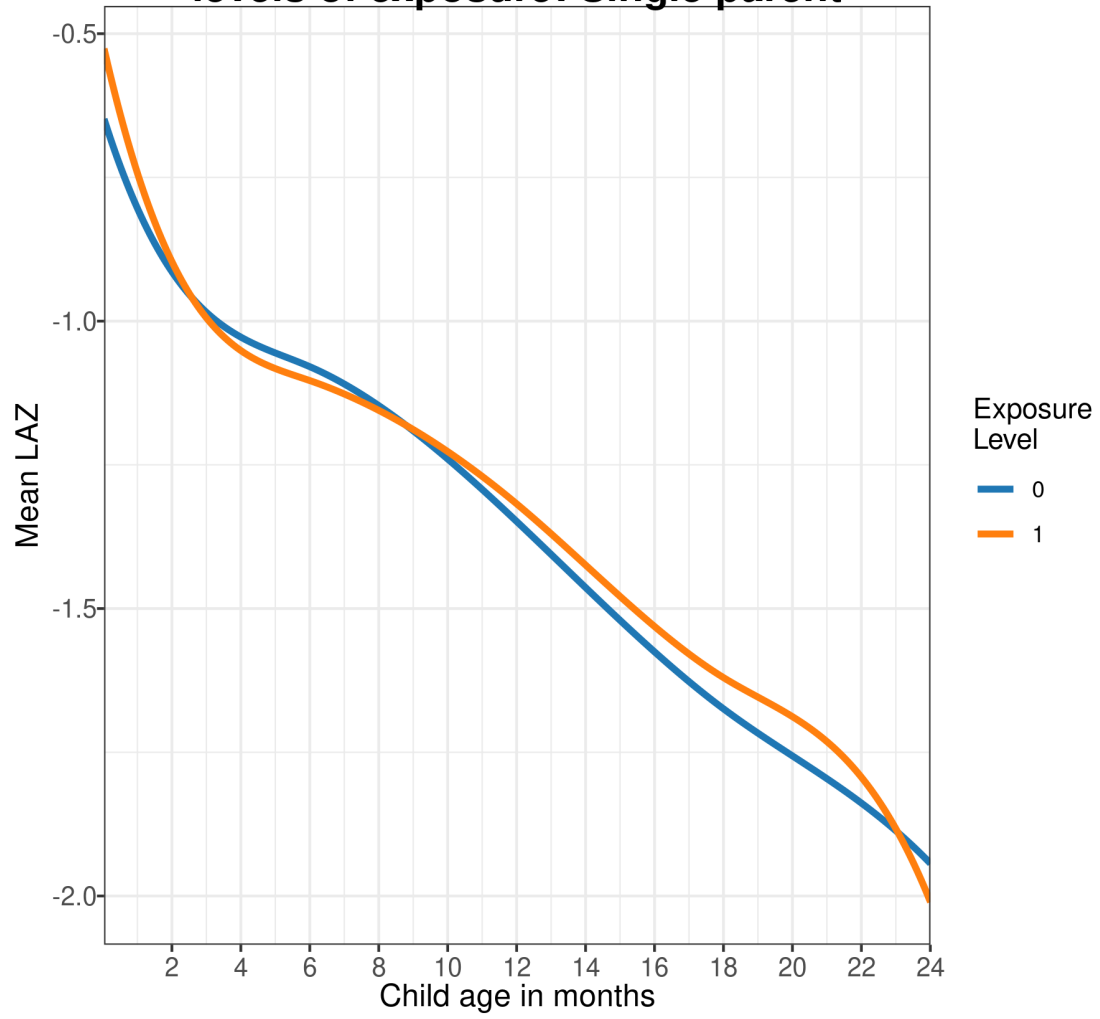

**Spline curves of LAZ stratified by levels of exposure: Treats drinking water**

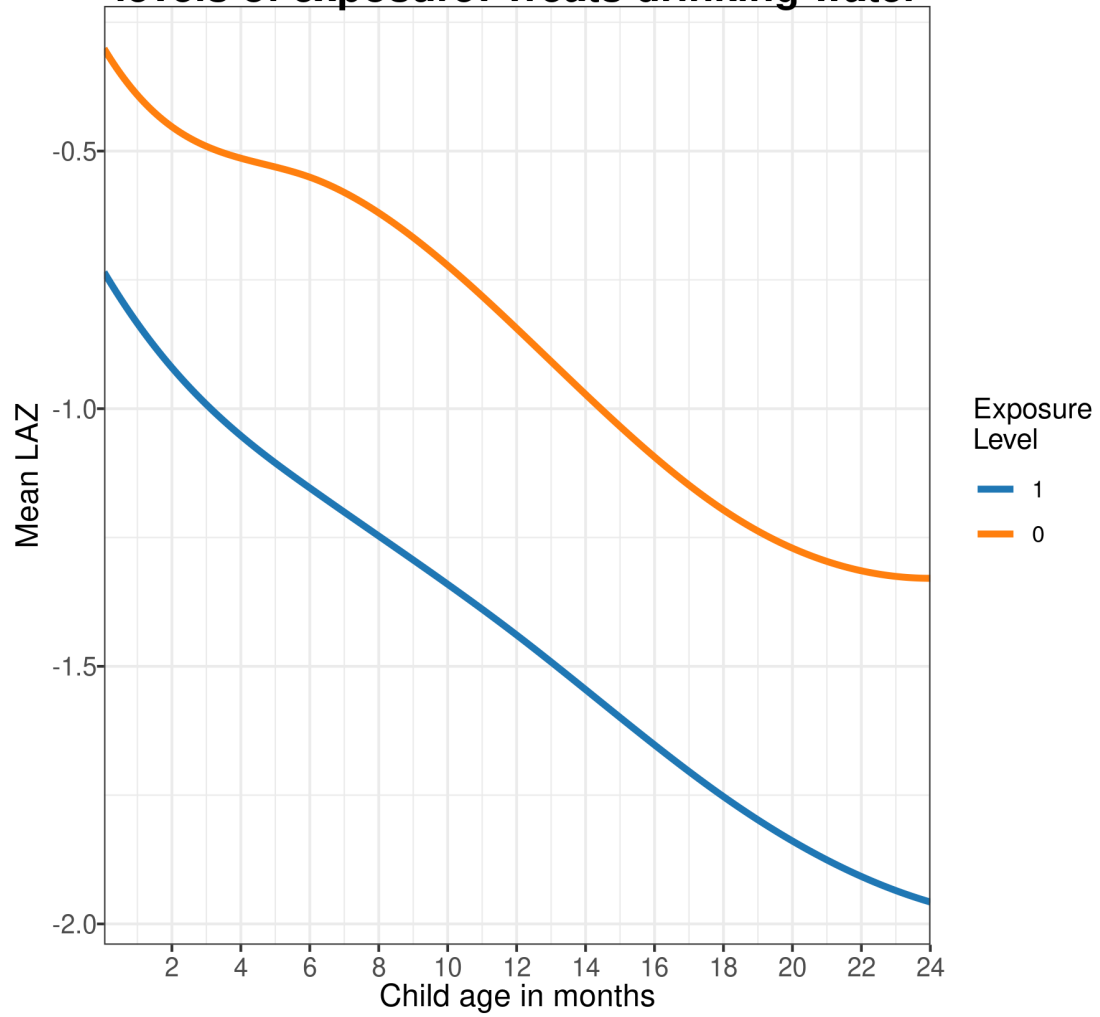

### Spline curves of LAZ stratified by levels of exposure: Vaginal birth

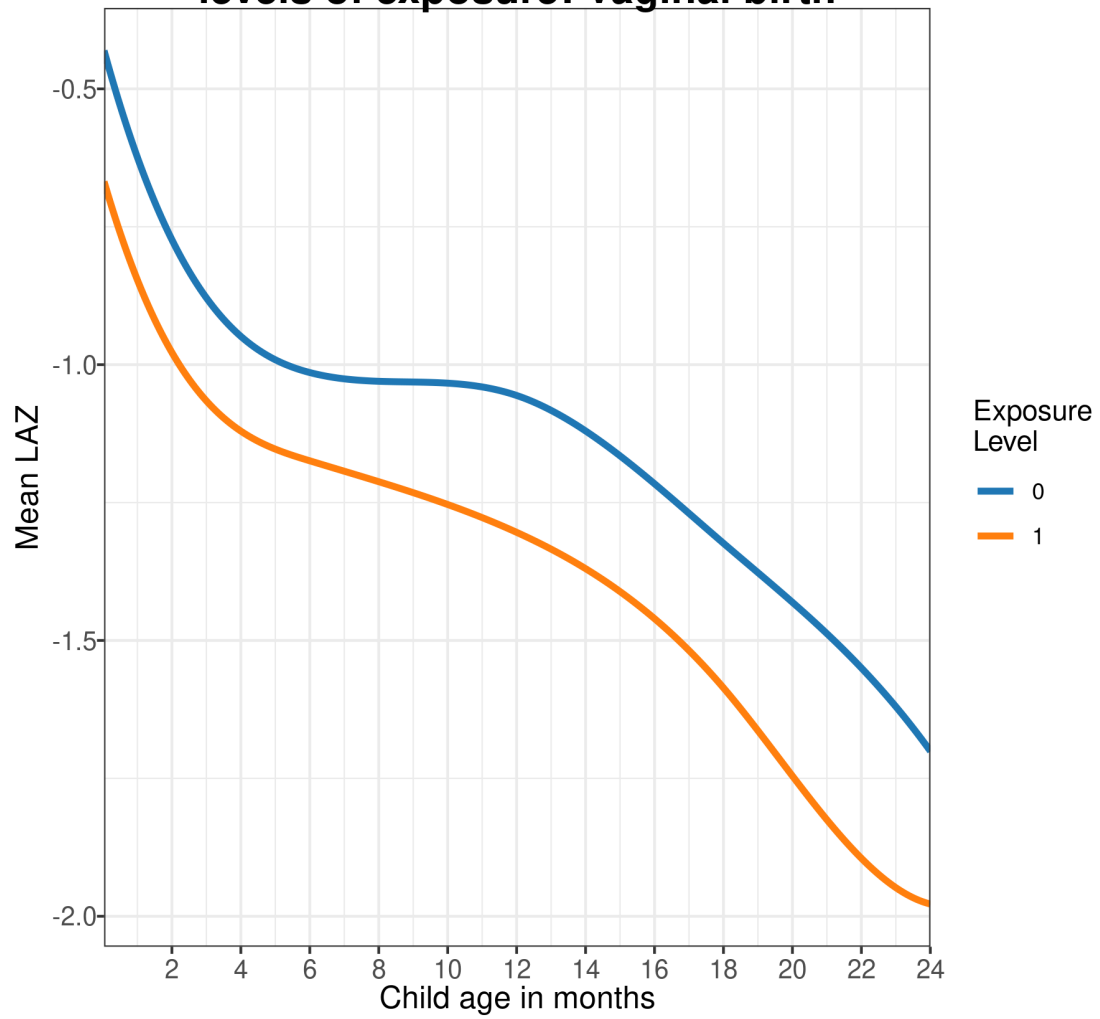

**Spline curves of WLZ stratified by levels of exposure: Birth length (cm)**

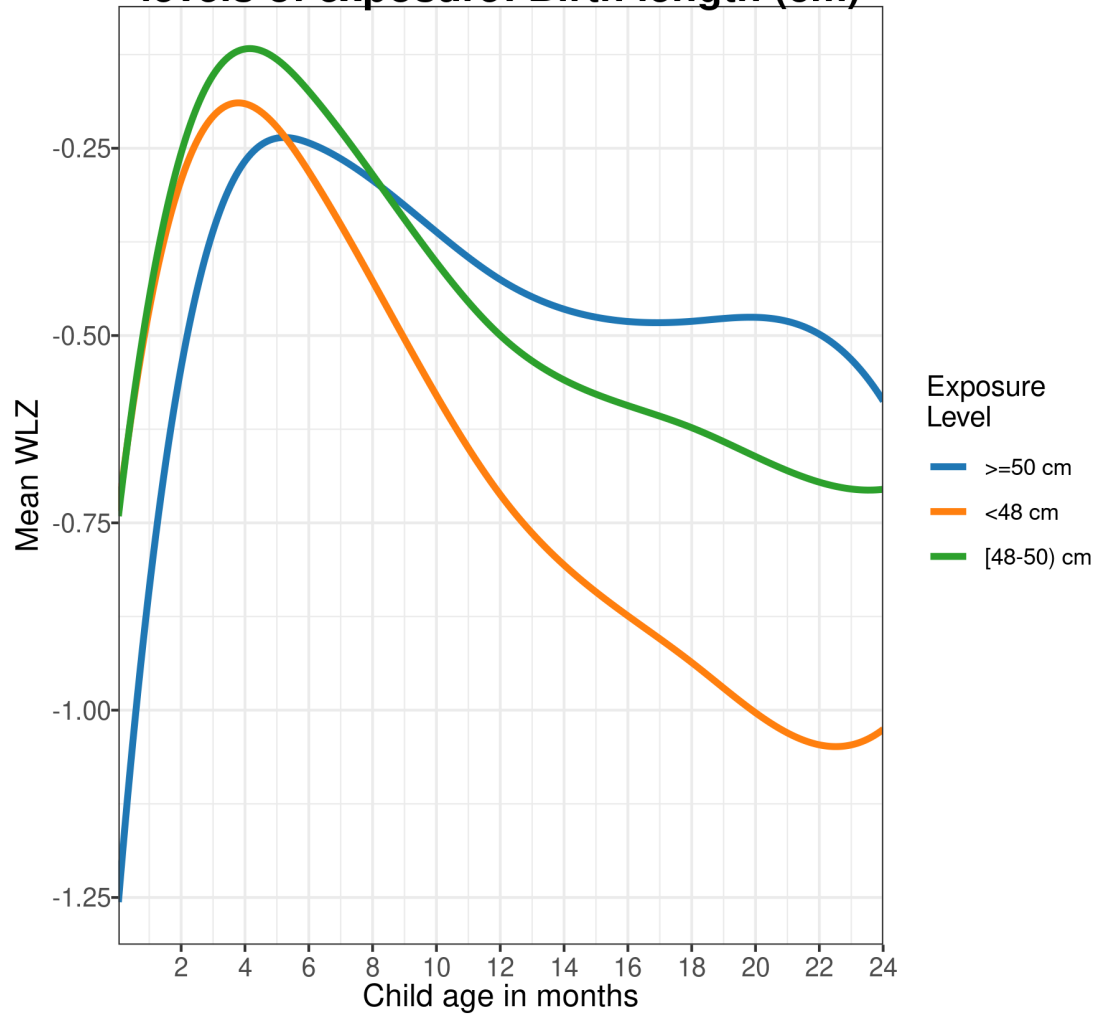

### Spline curves of WLZ stratified by levels of exposure: Birthweight (kg)

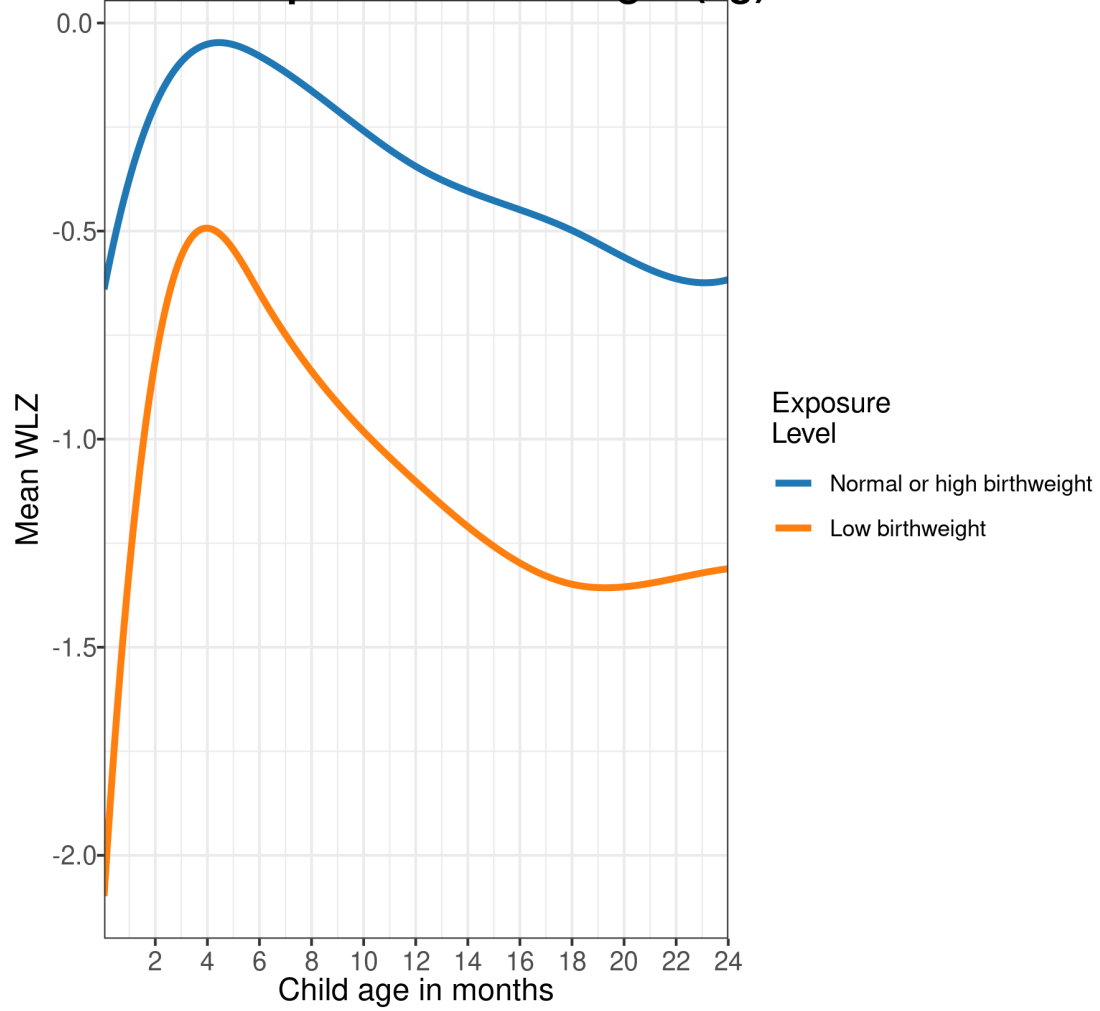



**Spline curves of WLZ stratified by levels of exposure: Clean cooking fuel usage**

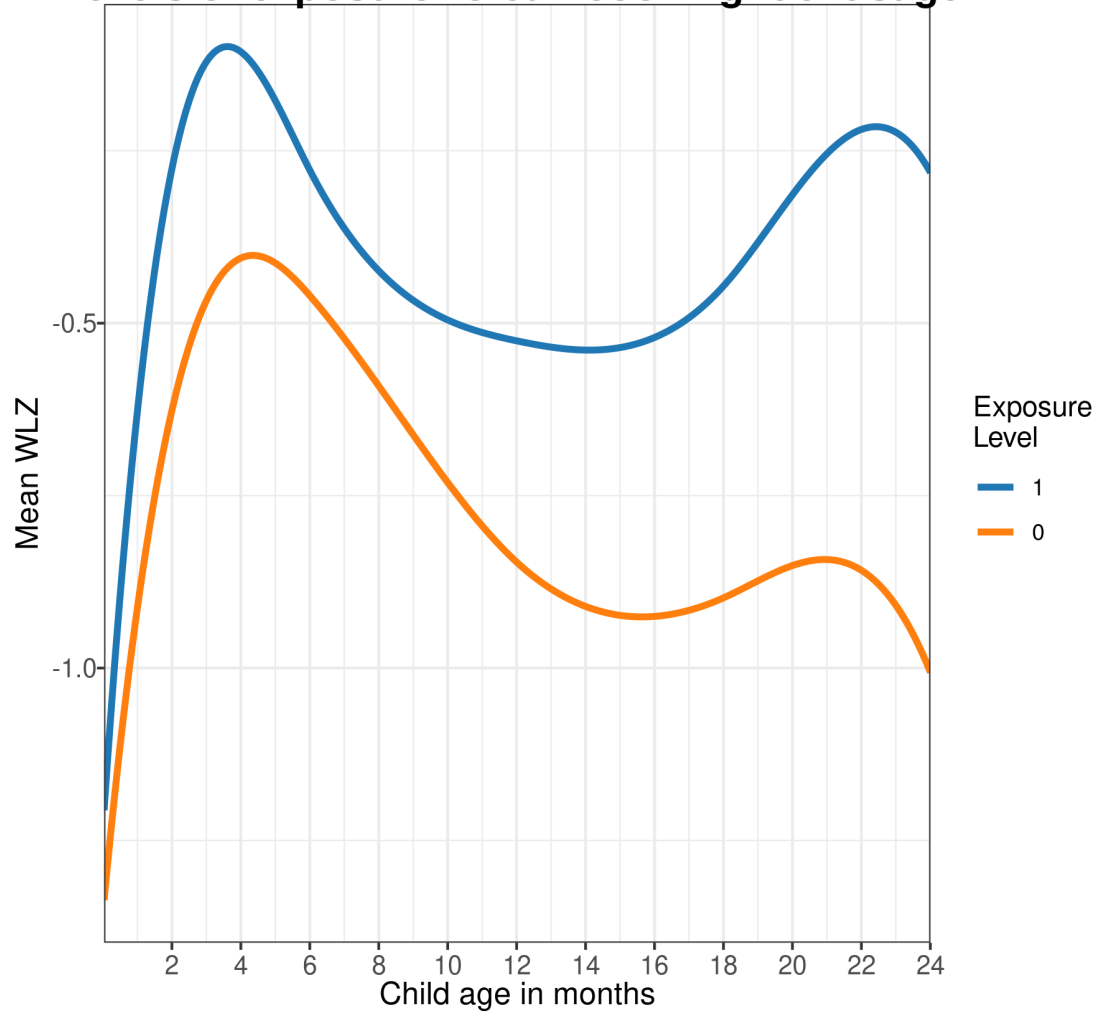

**Spline curves of WLZ stratified by levels of exposure: Breastfed hour after birth**

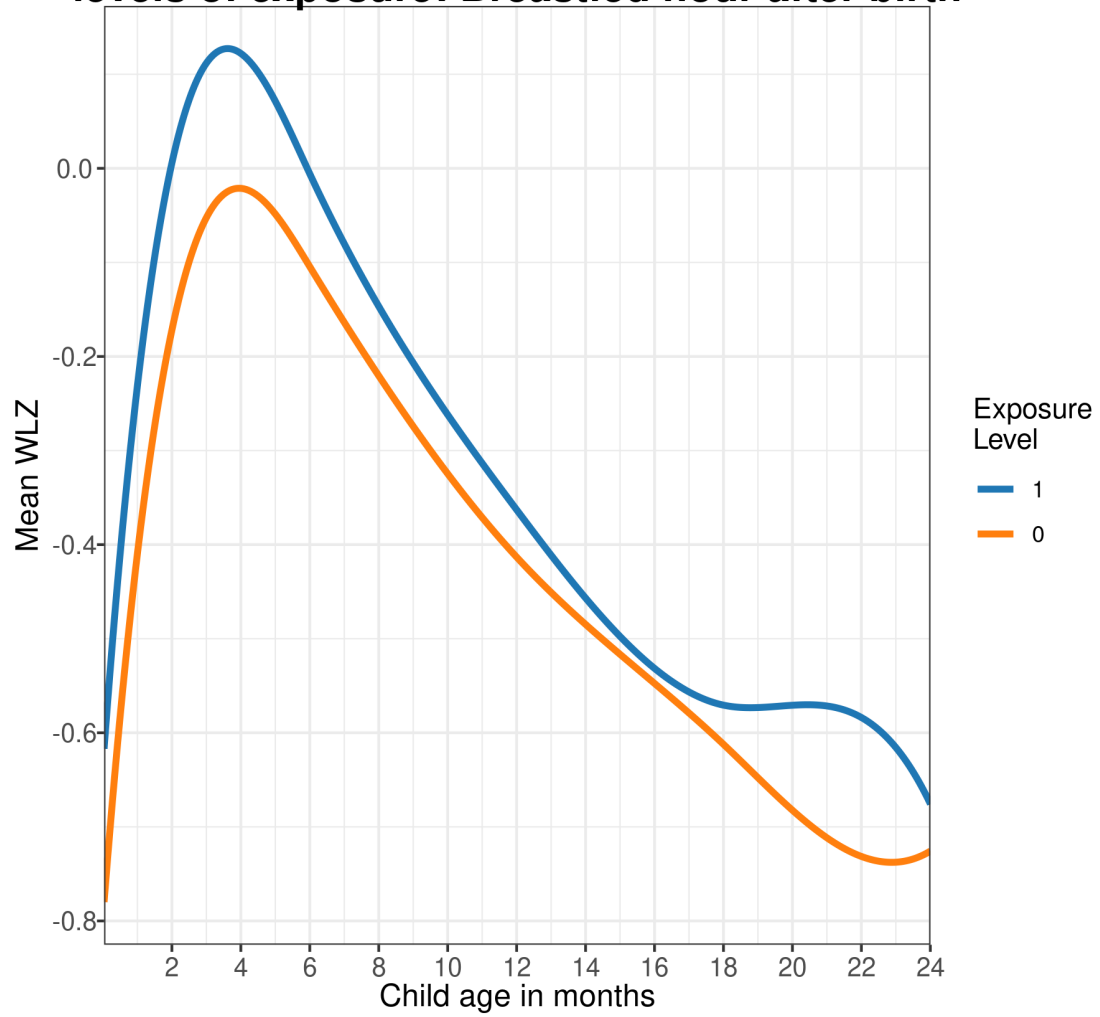

### Spline curves of WLZ stratified by levels of exposure: Enrolled stunted

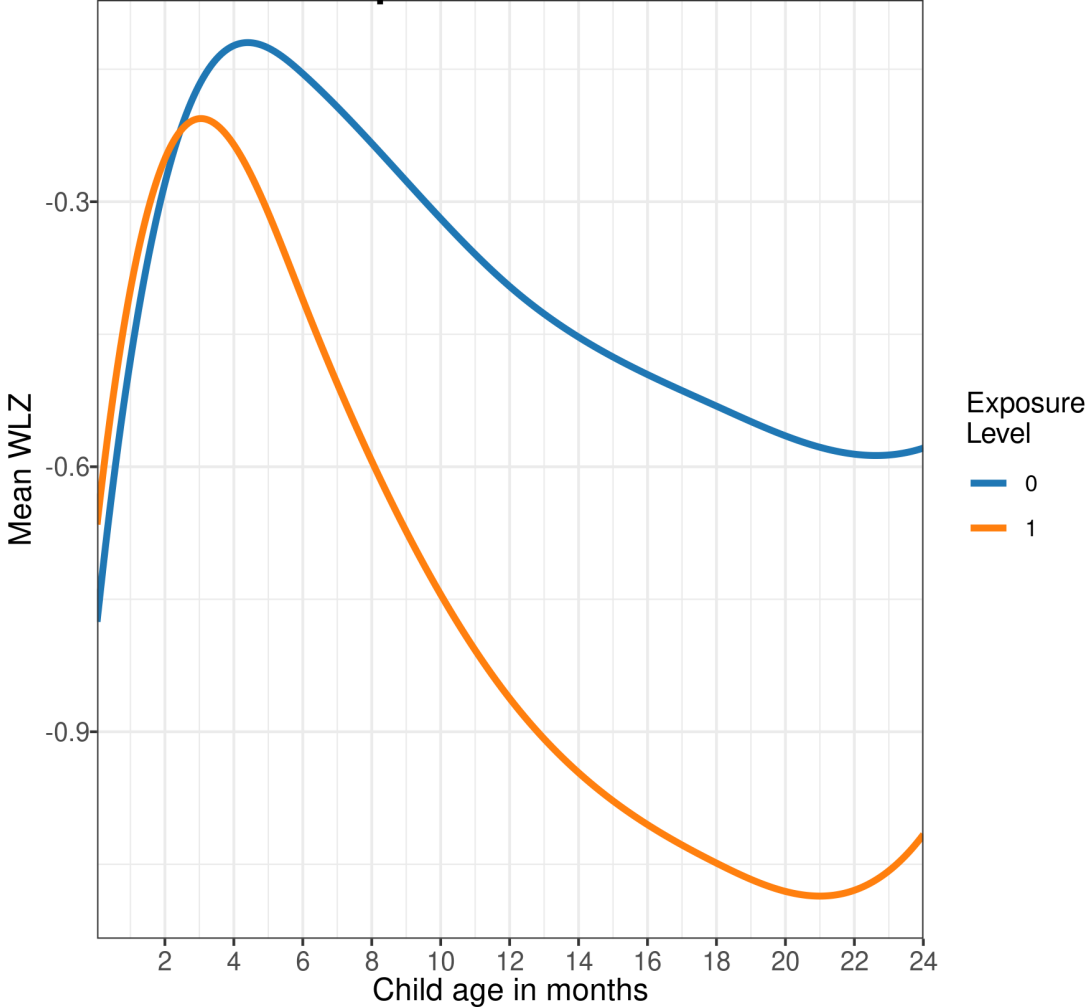

**Spline curves of WLZ stratified by levels of exposure: Enrolled wasted**

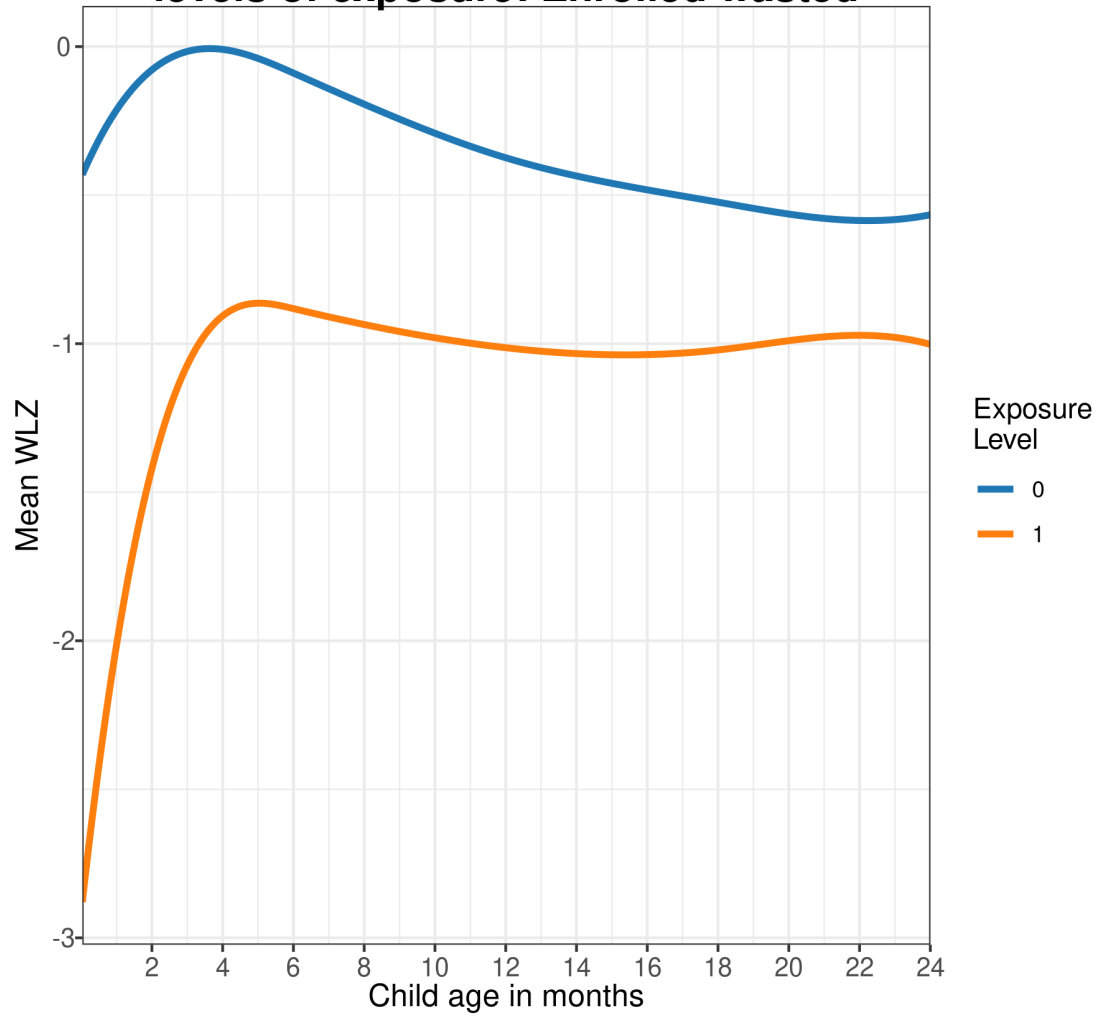

**Spline curves of WLZ stratified by levels of exposure: Father's age**

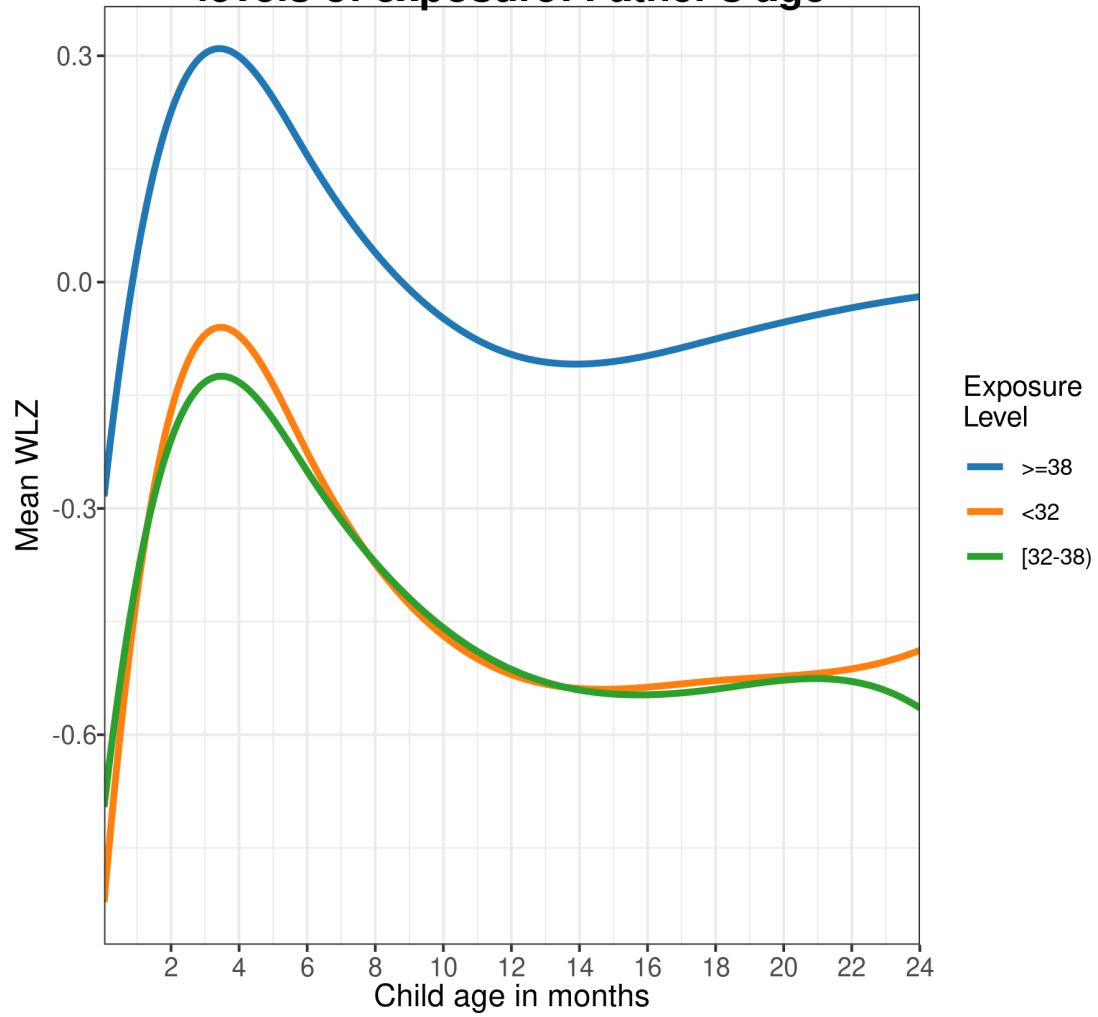

**Spline curves of WLZ stratified by levels of exposure: Father's education**

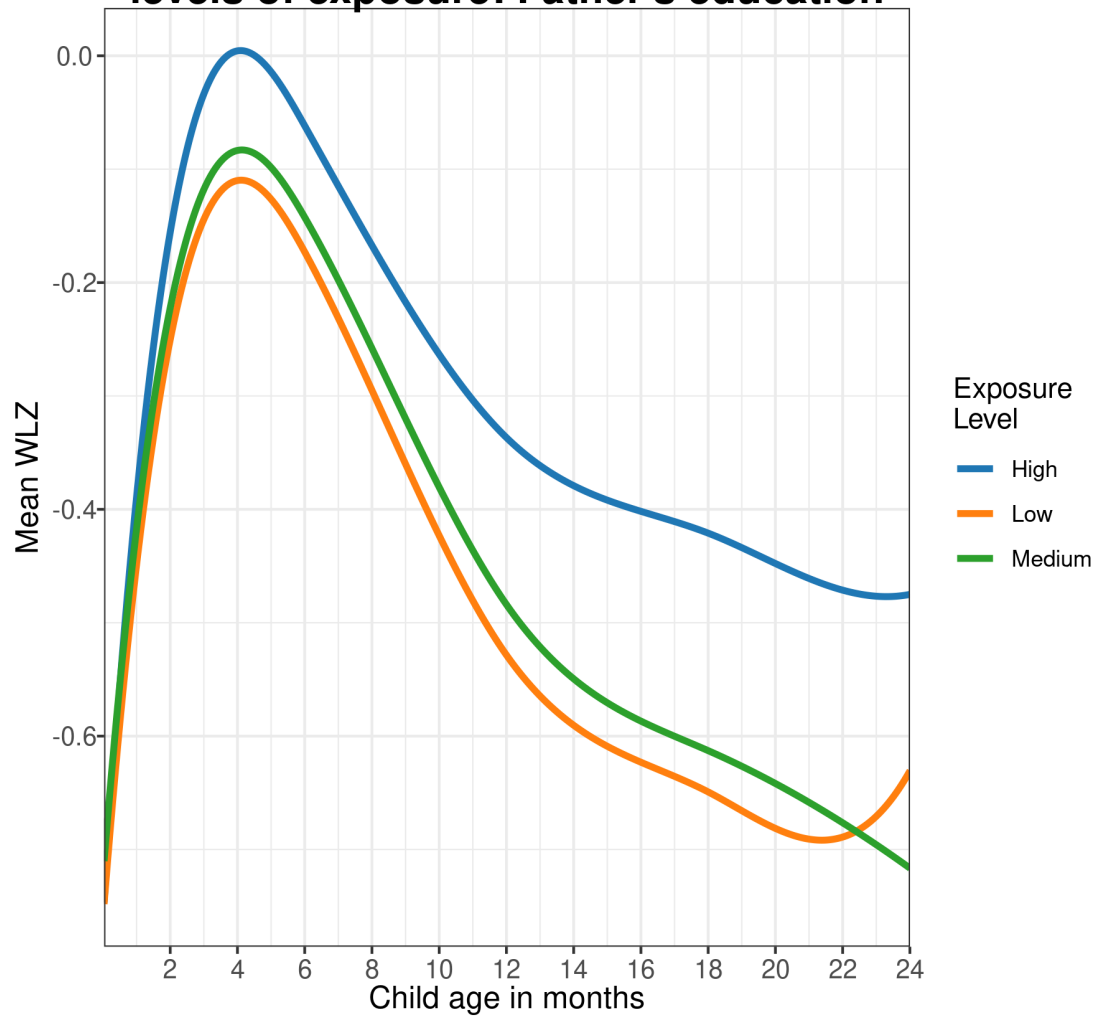

**Spline curves of WLZ stratified by levels of exposure: Father's height**

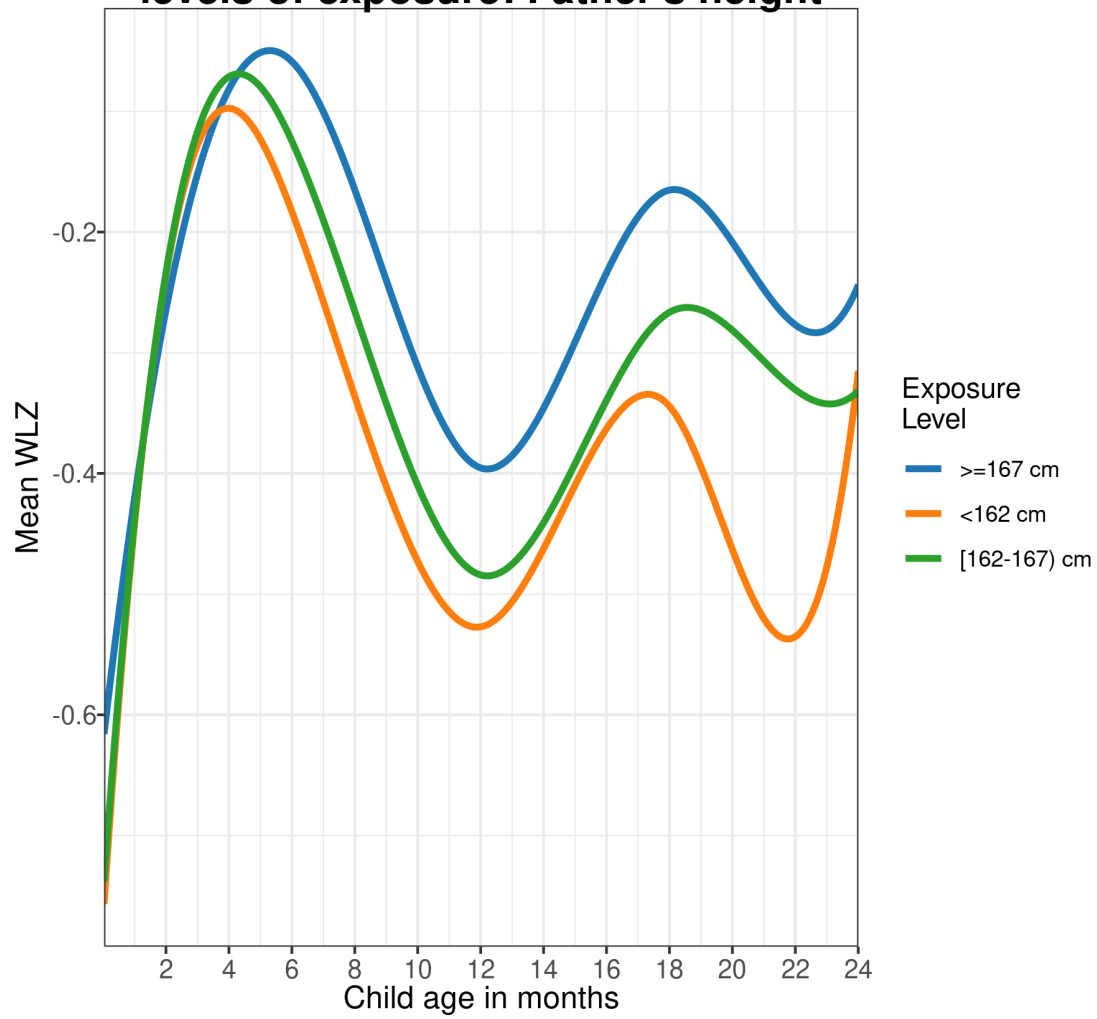

### Spline curves of WLZ stratified by levels of exposure: Gestational age at birth

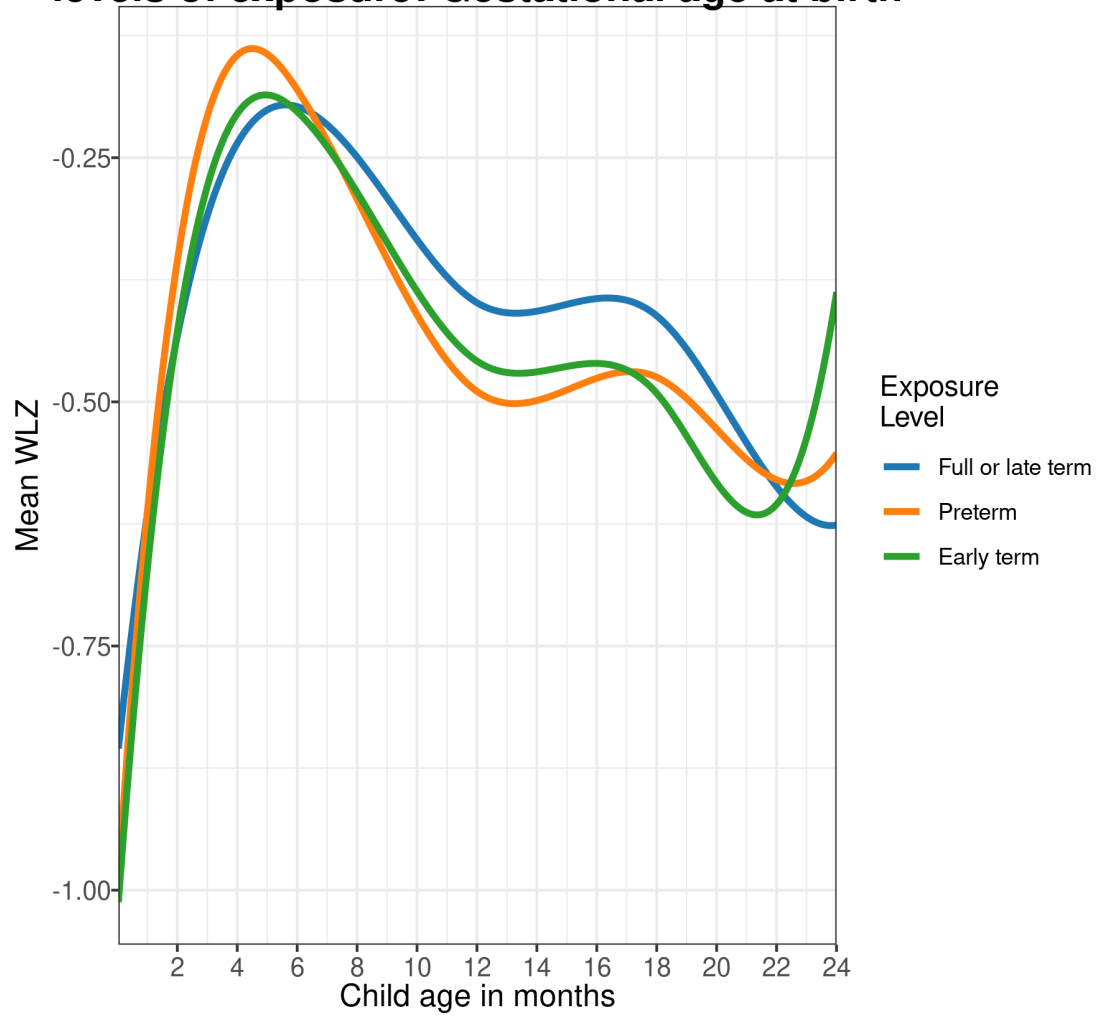



**Spline curves of WLZ stratified by levels of exposure: Child delivered at home**

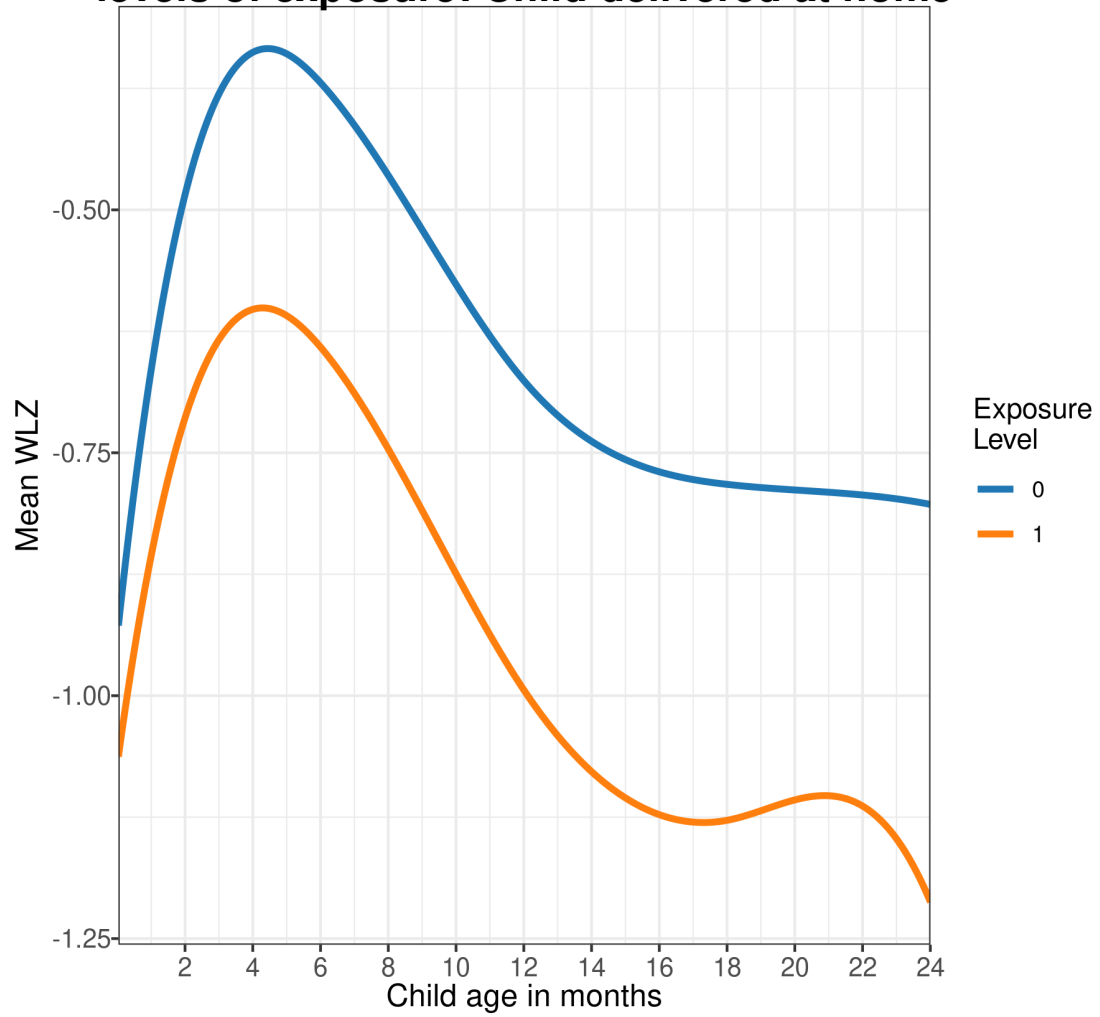

### Spline curves of WLZ stratified by levels of exposure: HH food security

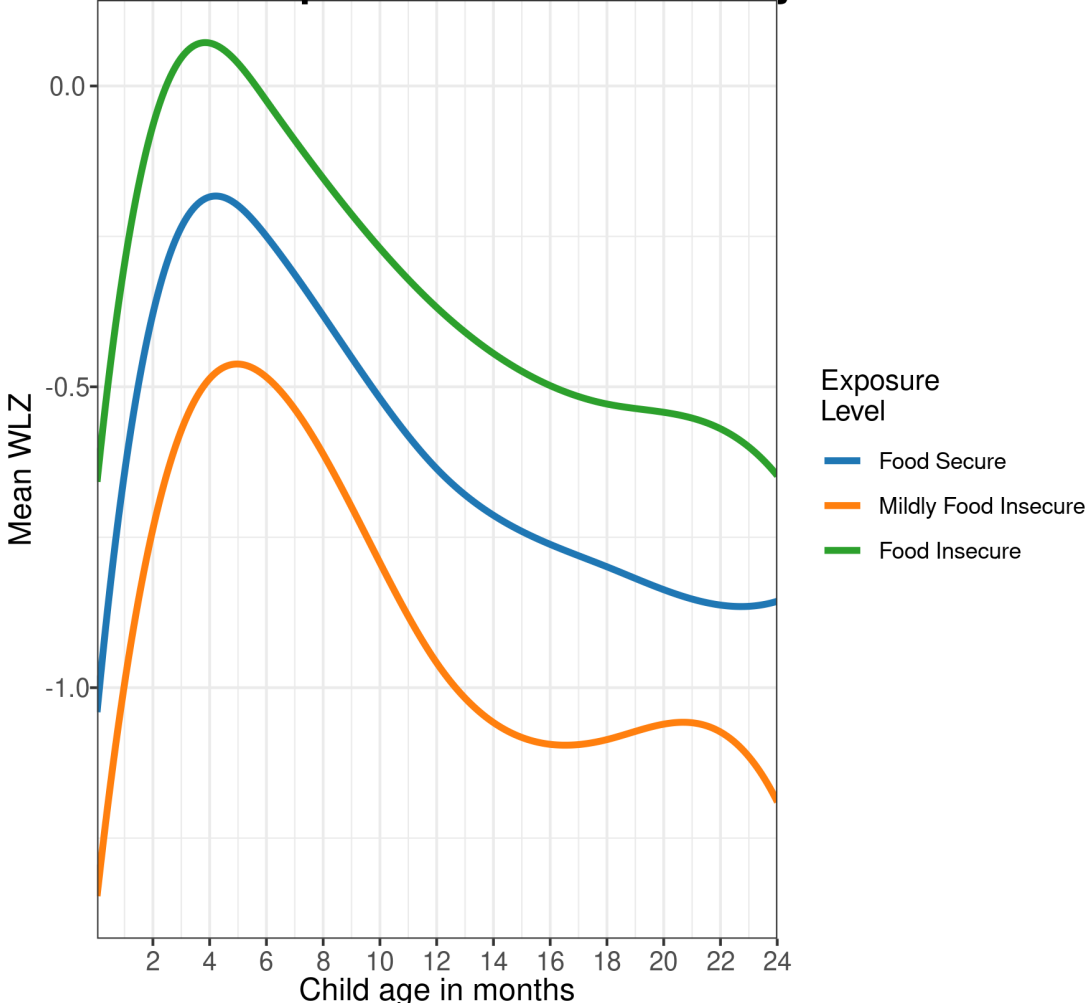

**Spline curves of WLZ stratified by levels of exposure: HH wealth**

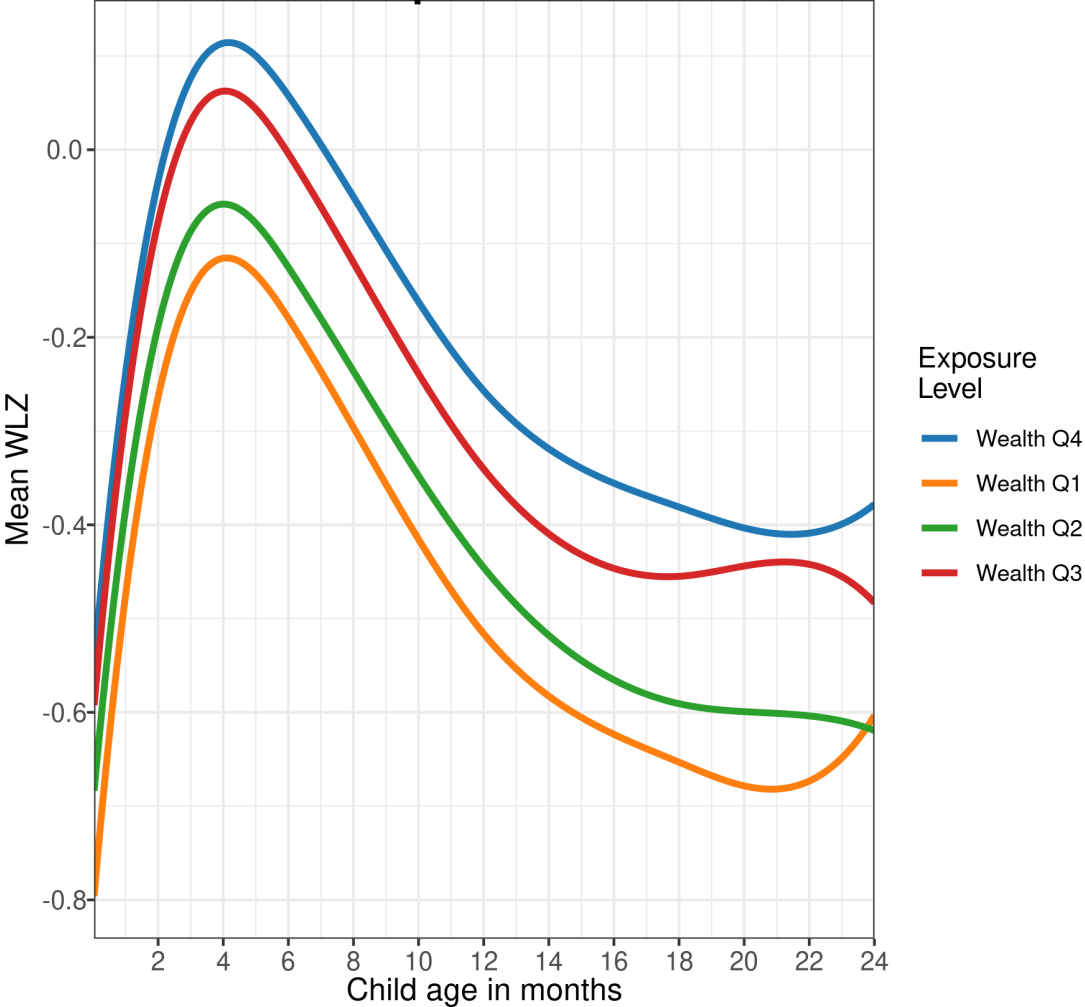

### Spline curves of WLZ stratified by levels of exposure: Improved floor

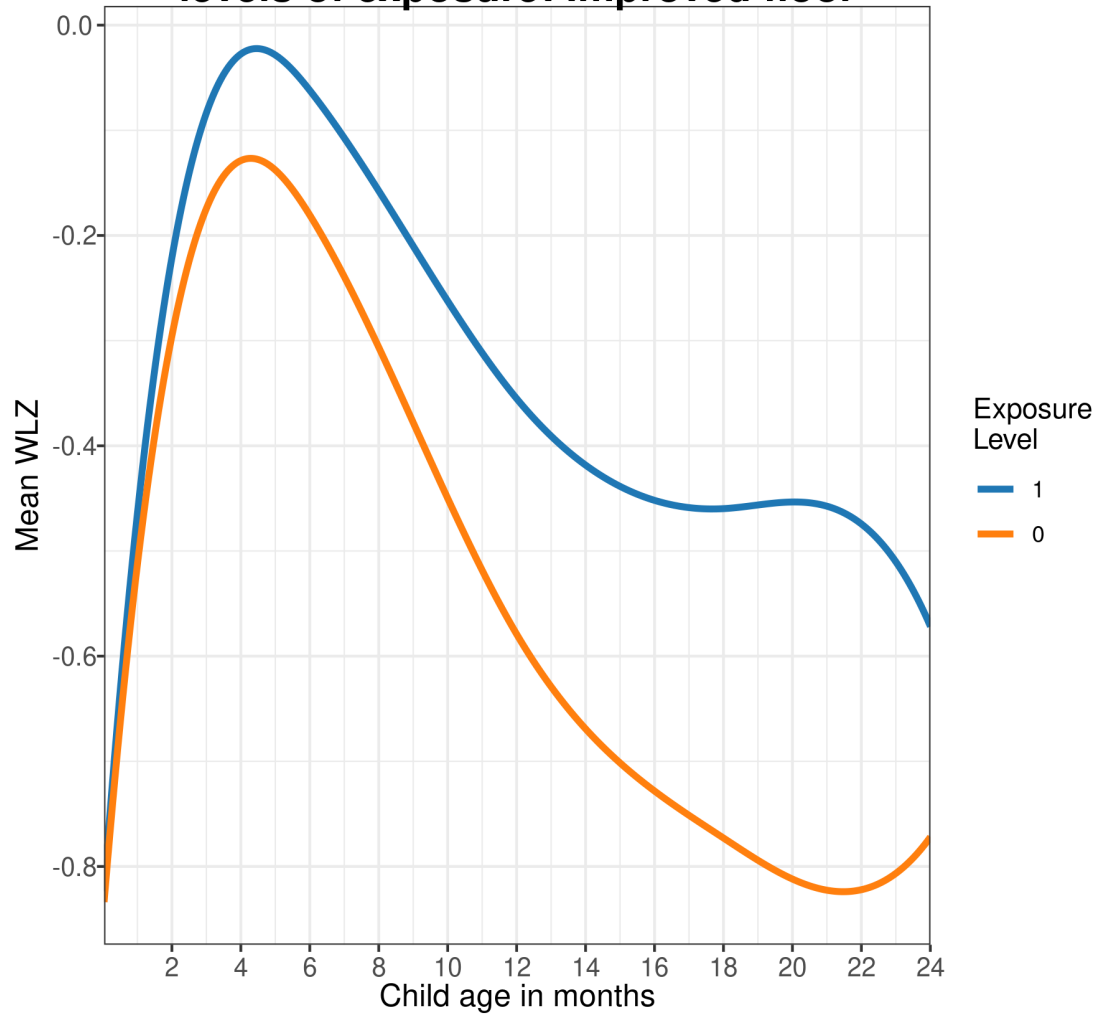

### Spline curves of WLZ stratified by levels of exposure: Improved sanitation

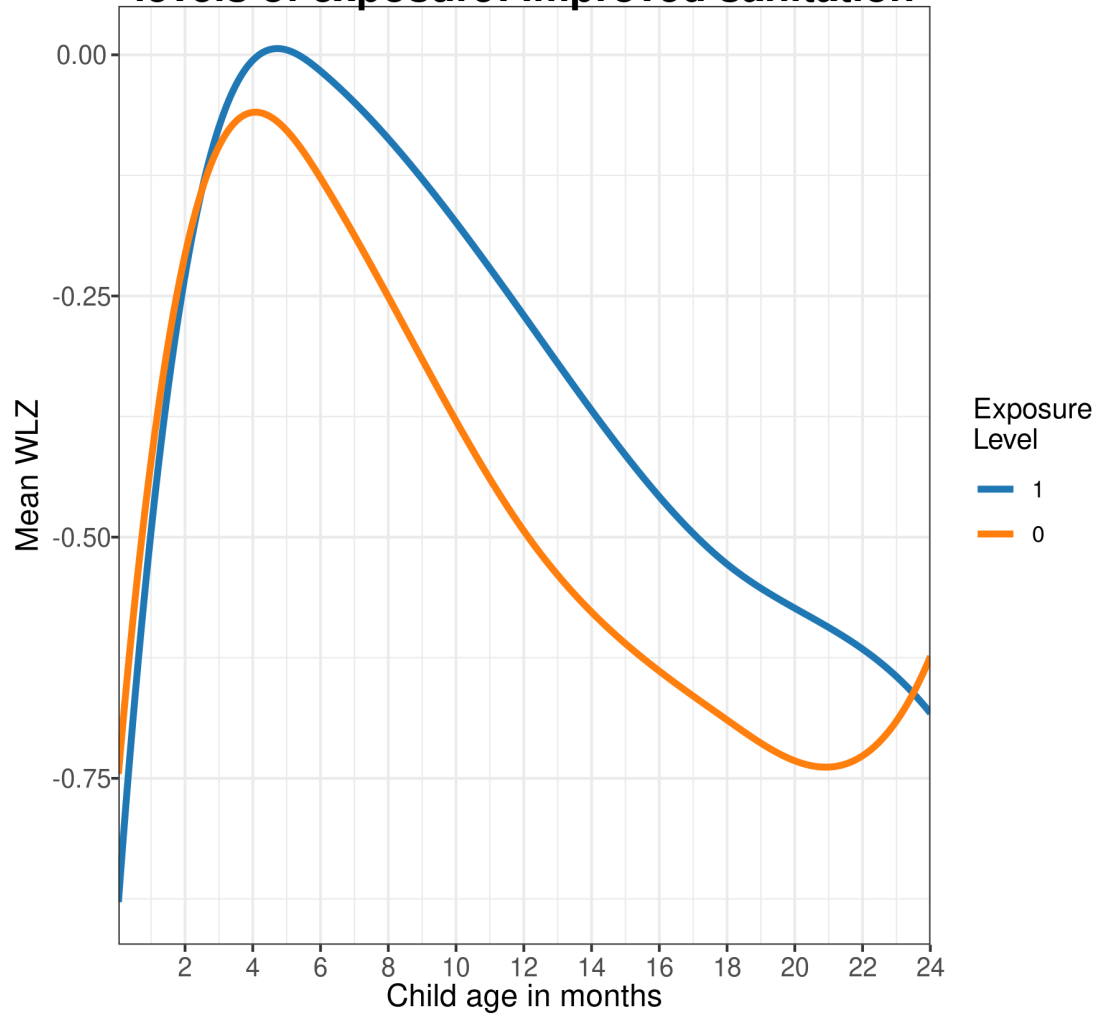

### Spline curves of WLZ stratified by levels of exposure: Mother's age

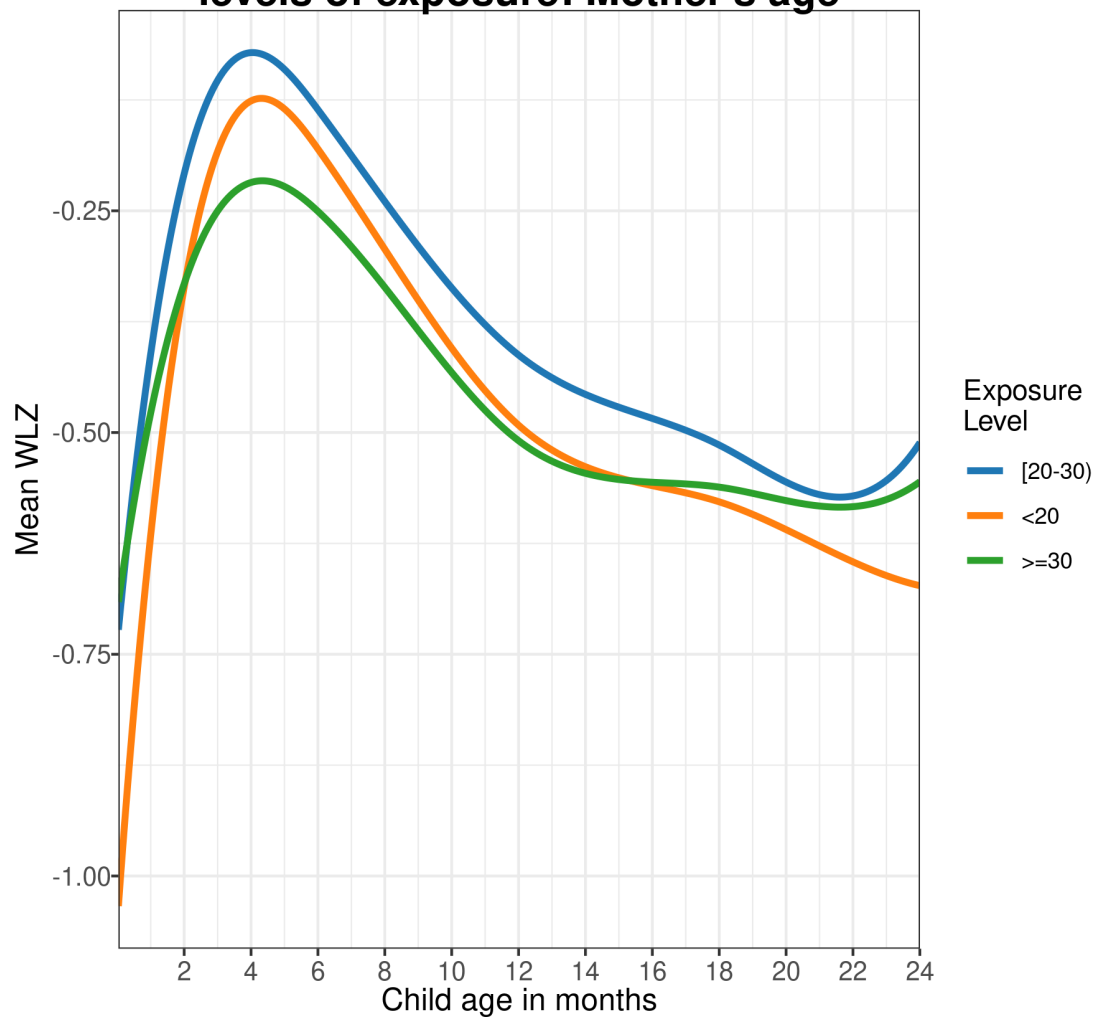

**Spline curves of WLZ stratified by levels of exposure: Mother's education**

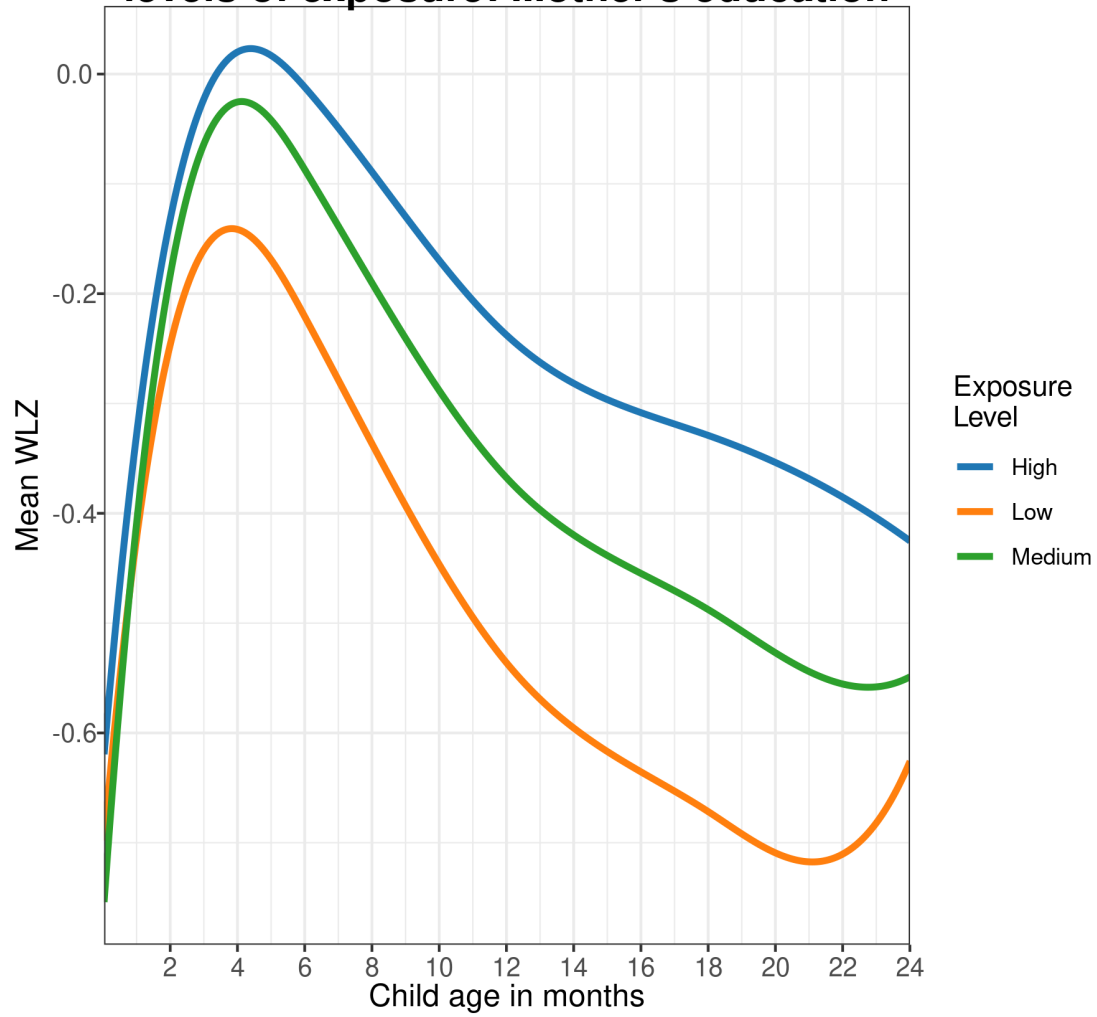

**Spline curves of WLZ stratified by levels of exposure: # of children <5 in HH**

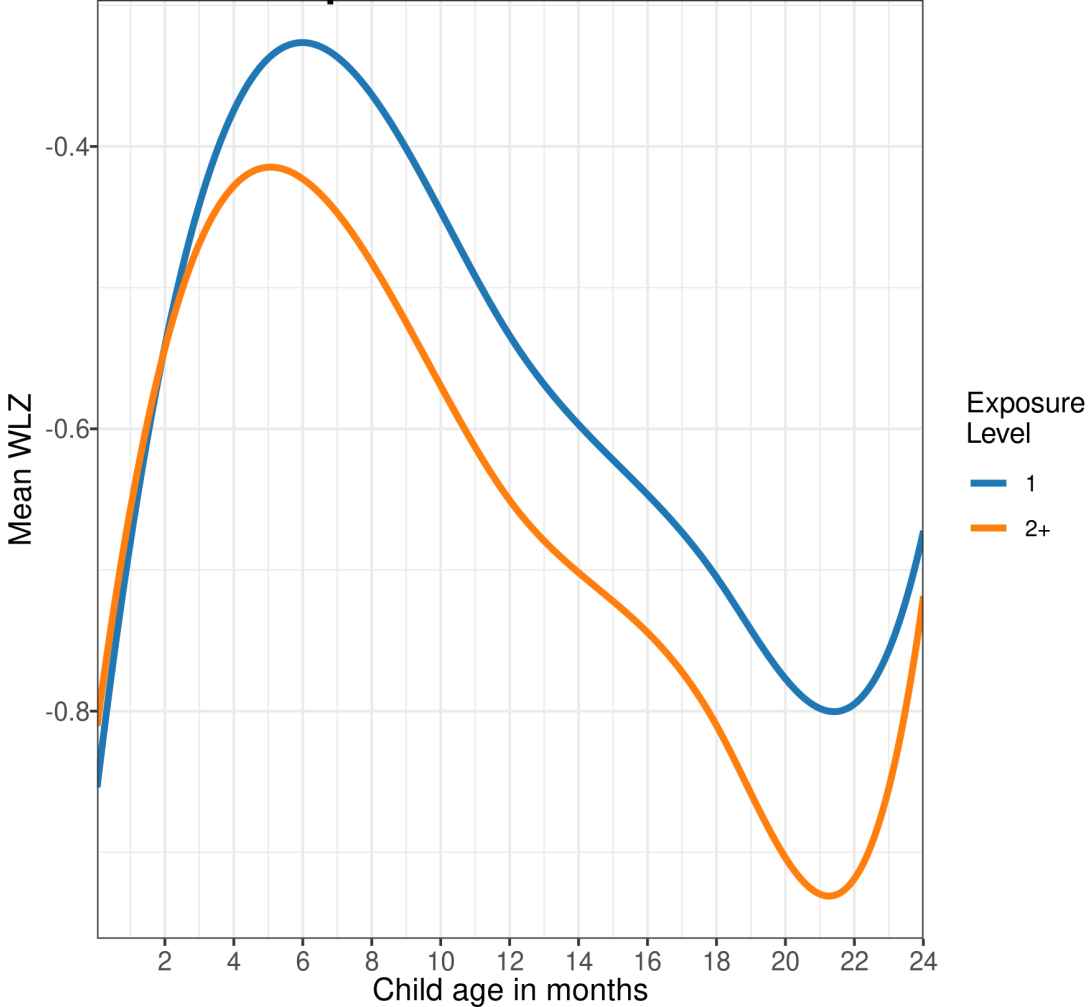



**Spline curves of WLZ stratified by levels of exposure: # of people in HH**

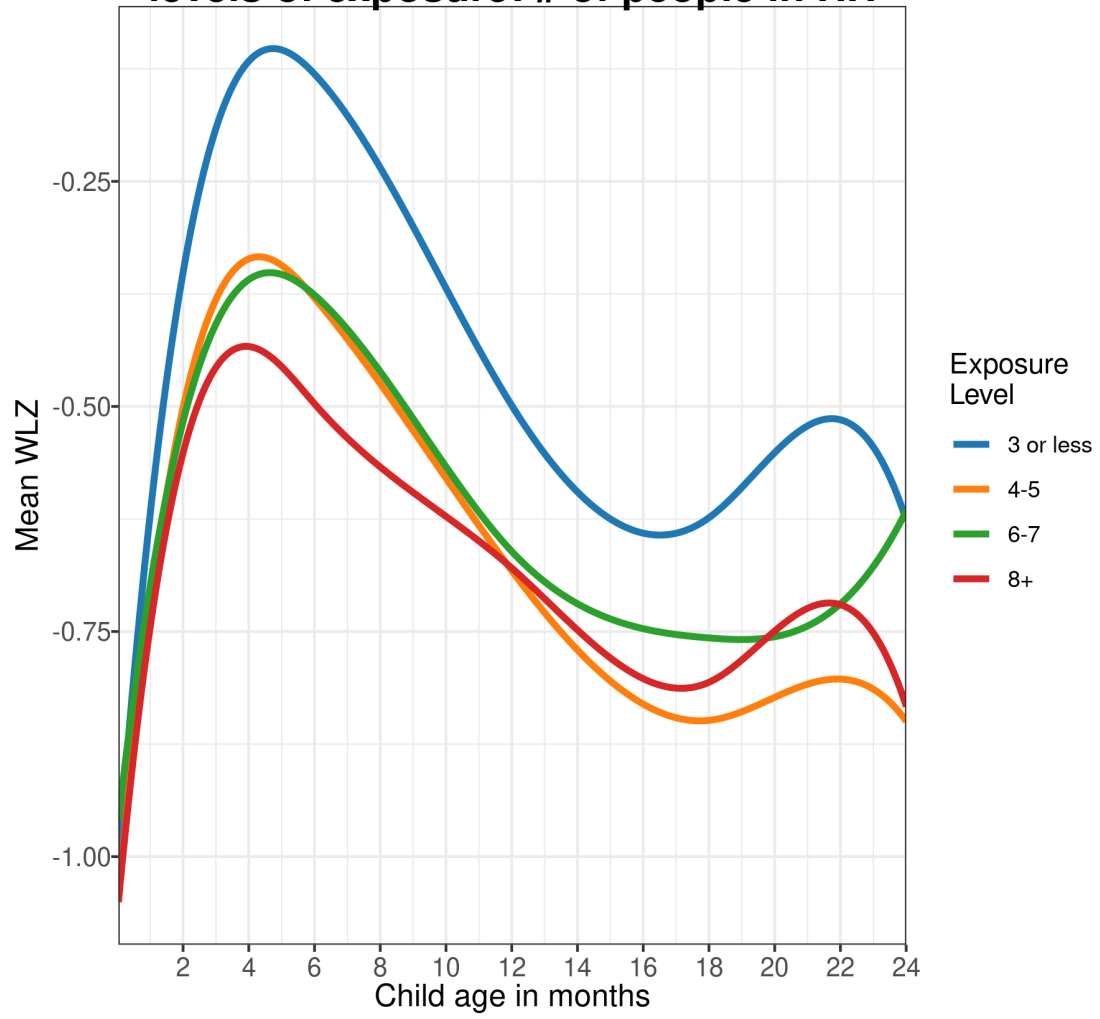

**Spline curves of WLZ stratified by levels of exposure: # of rooms in HH**

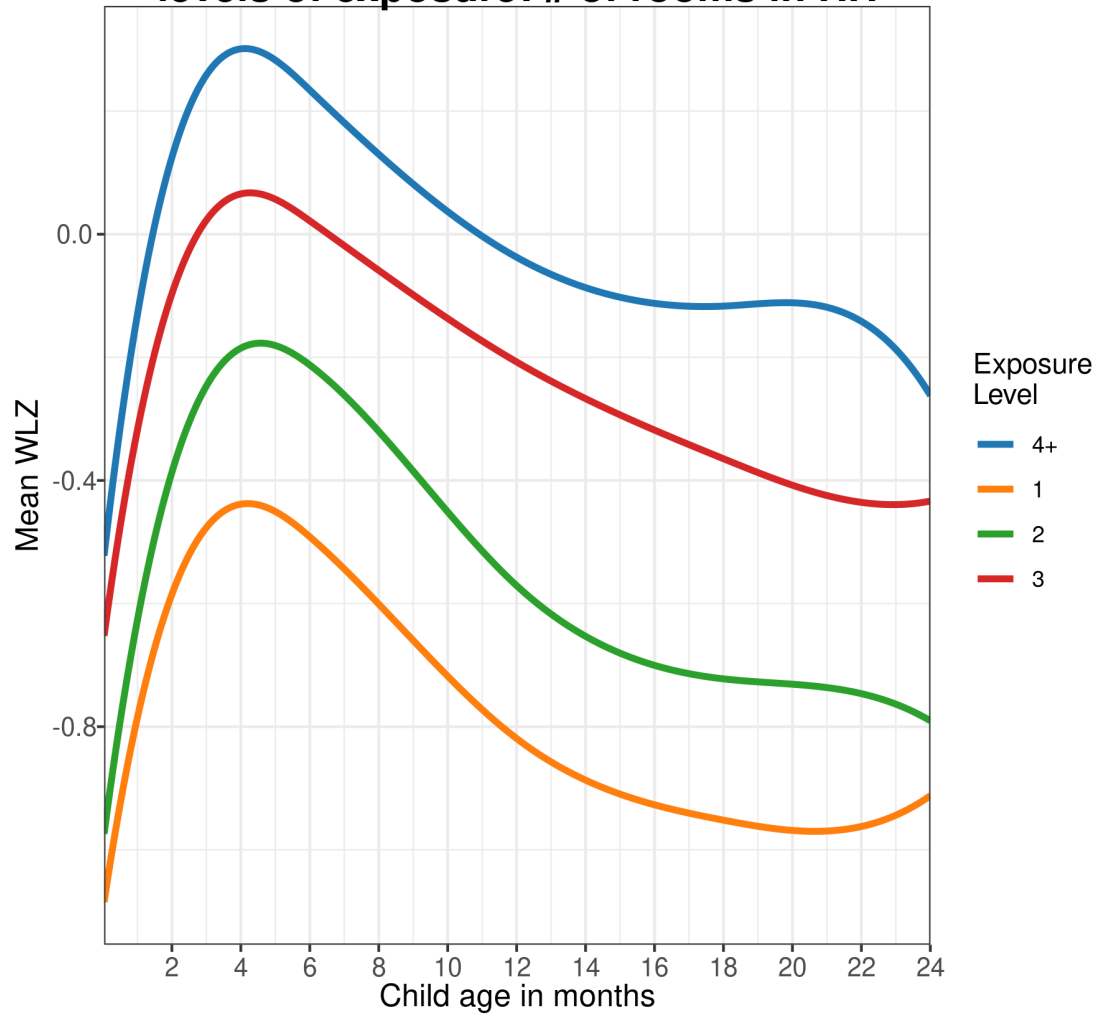

**Spline curves of WLZ stratified by levels of exposure: Birth order**

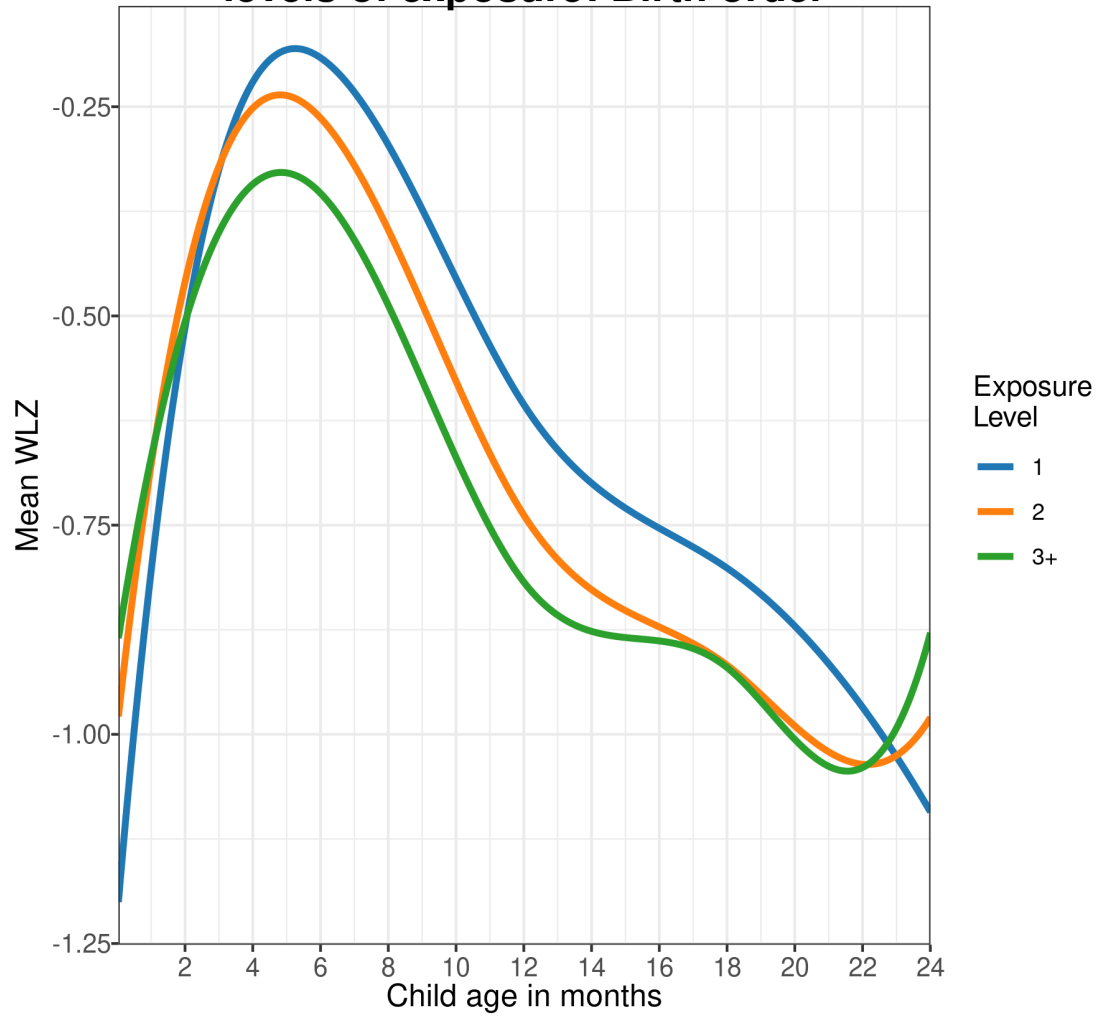

**Spline curves of WLZ stratified by levels of exposure: Diarrhea <6 mo. (% days)**

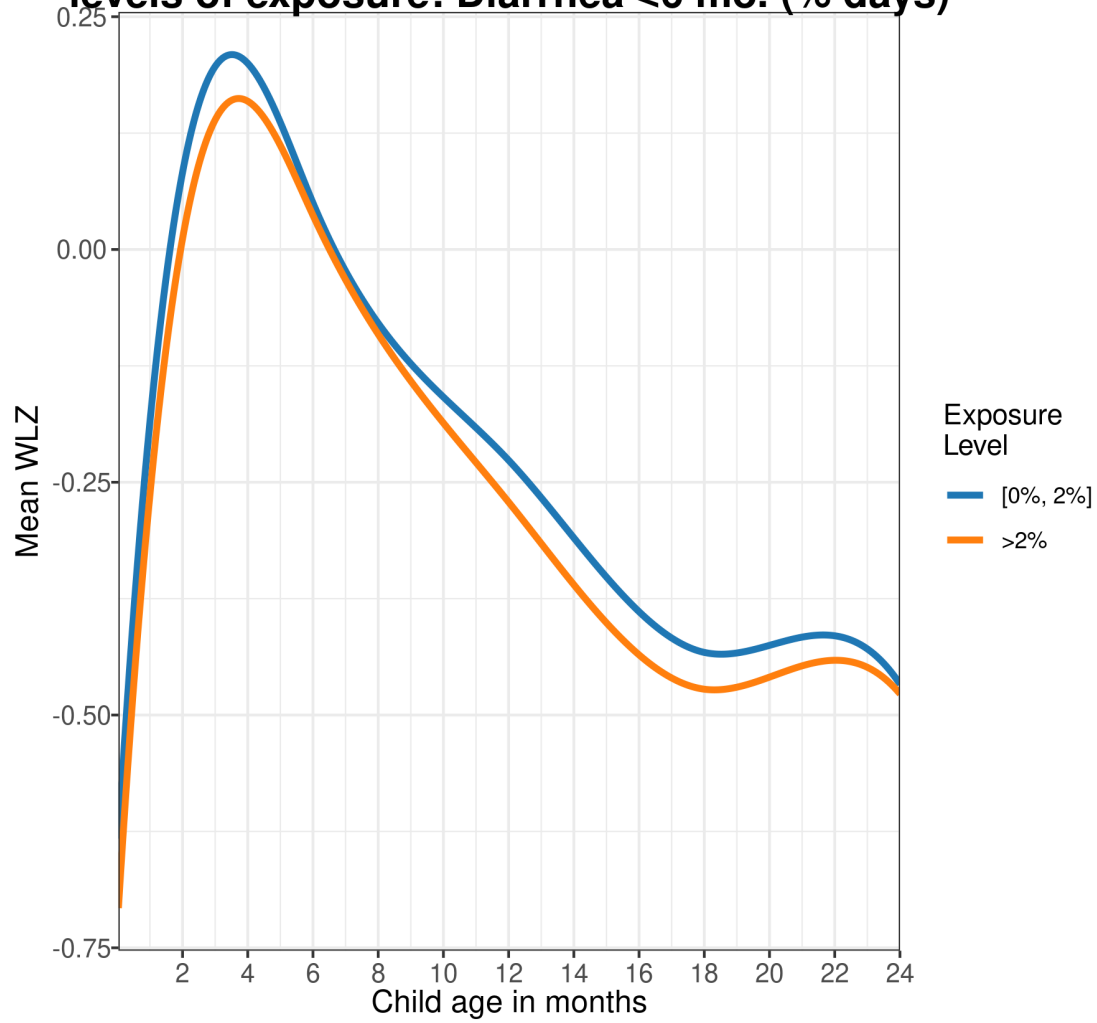

**Spline curves of WLZ stratified by levels of exposure: Diarrhea <24 mo. (% days)**

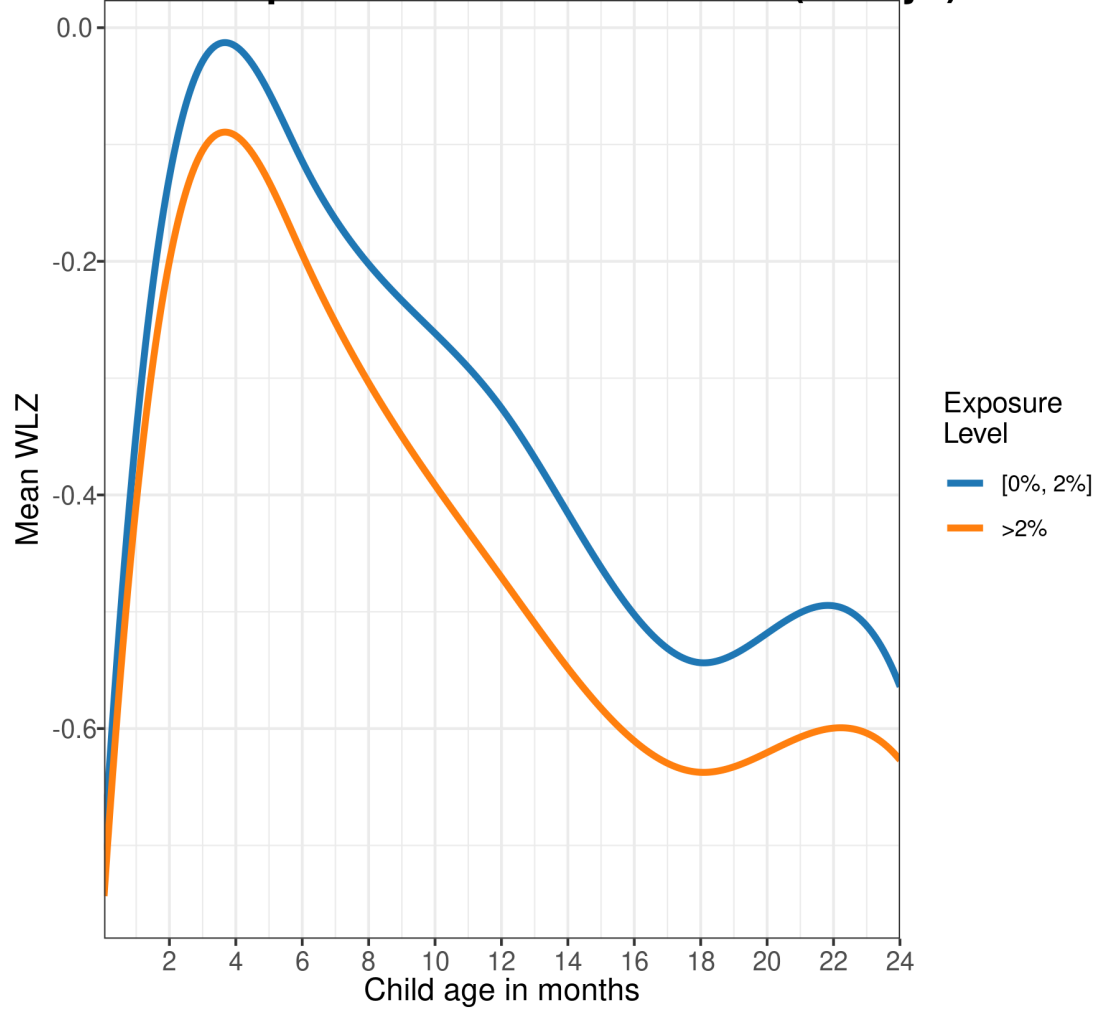

**Spline curves of WLZ stratified by levels of exposure: Persistent wasting <6 mo.**

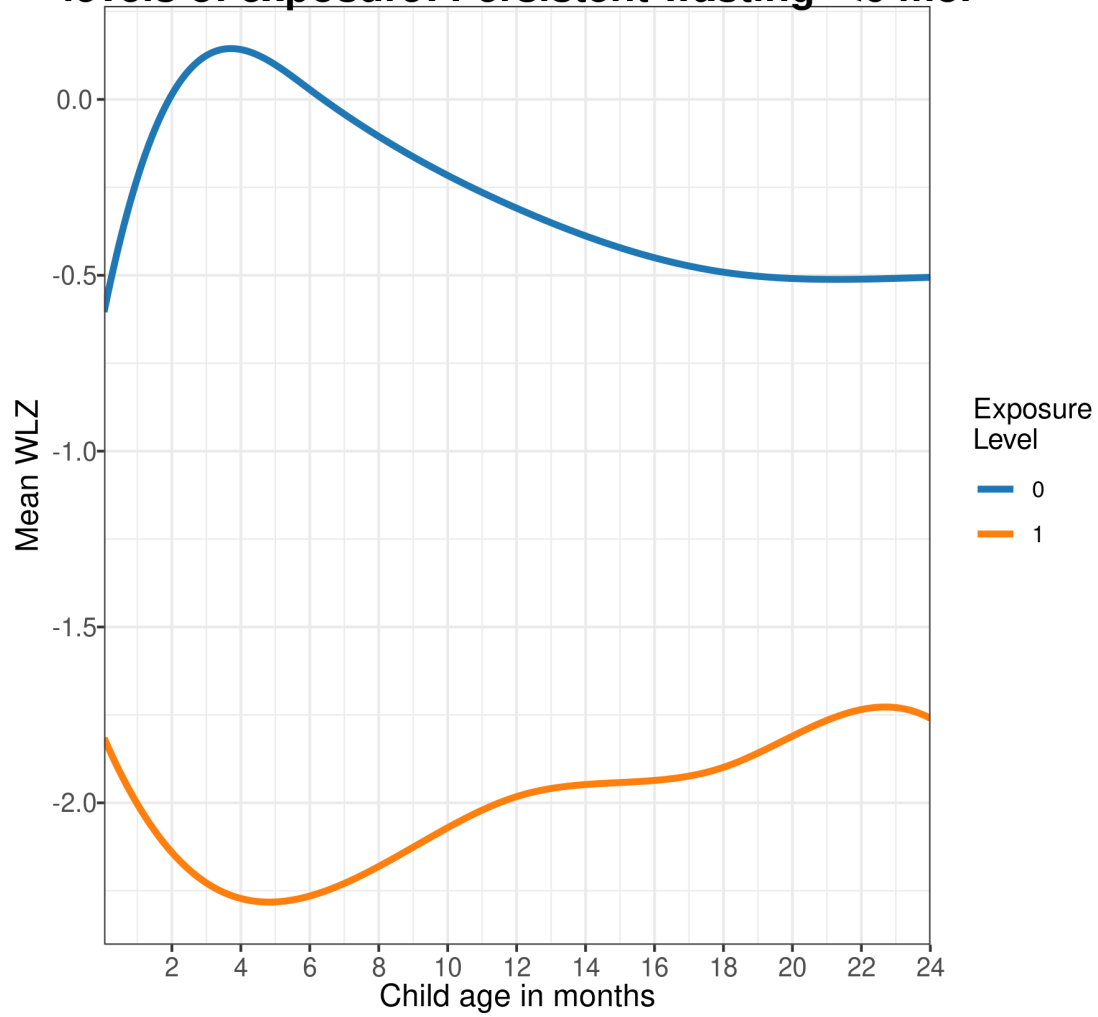

**Spline curves of WLZ stratified by levels of exposure: Excl/Pred breastfed <6mo.**

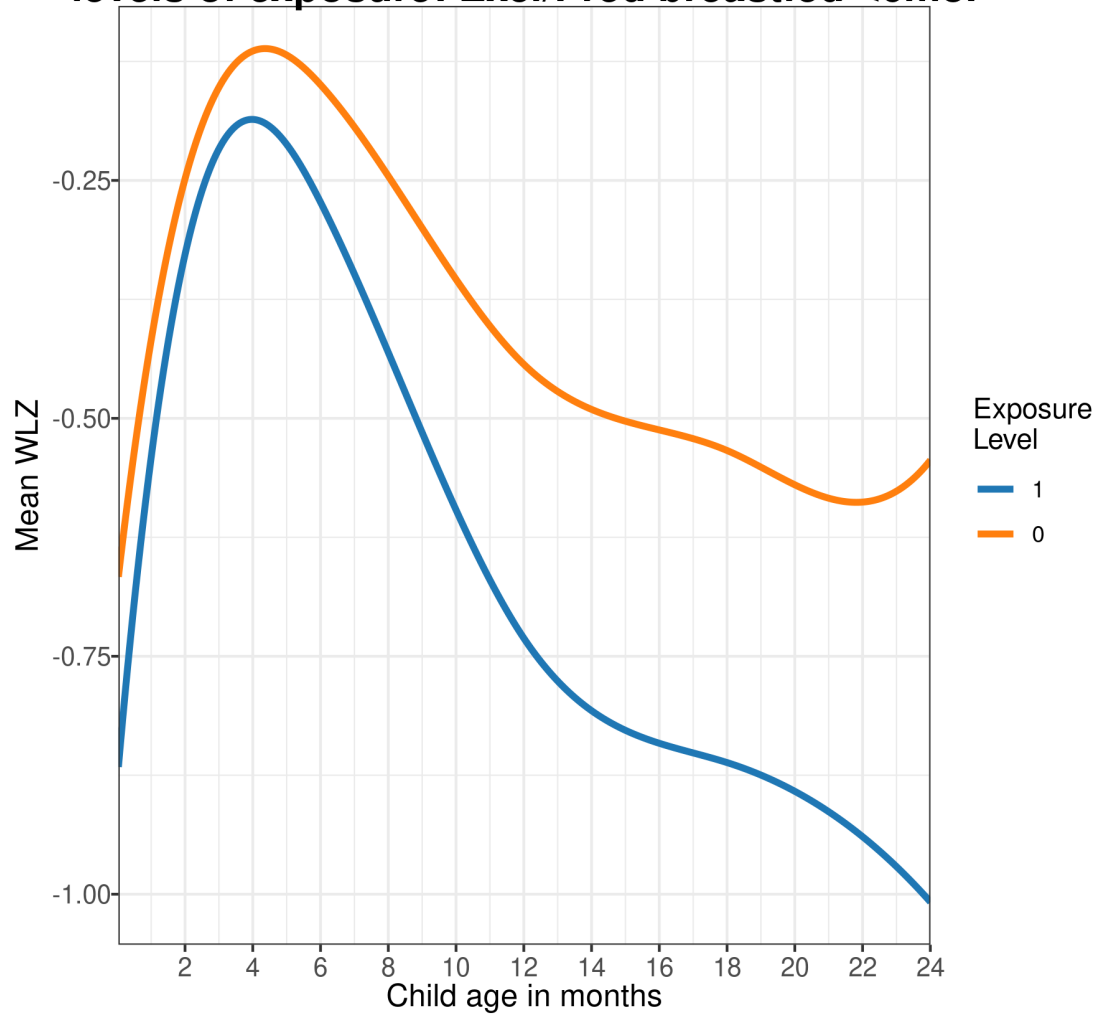

**Spline curves of WLZ stratified by levels of exposure: Safe water source**

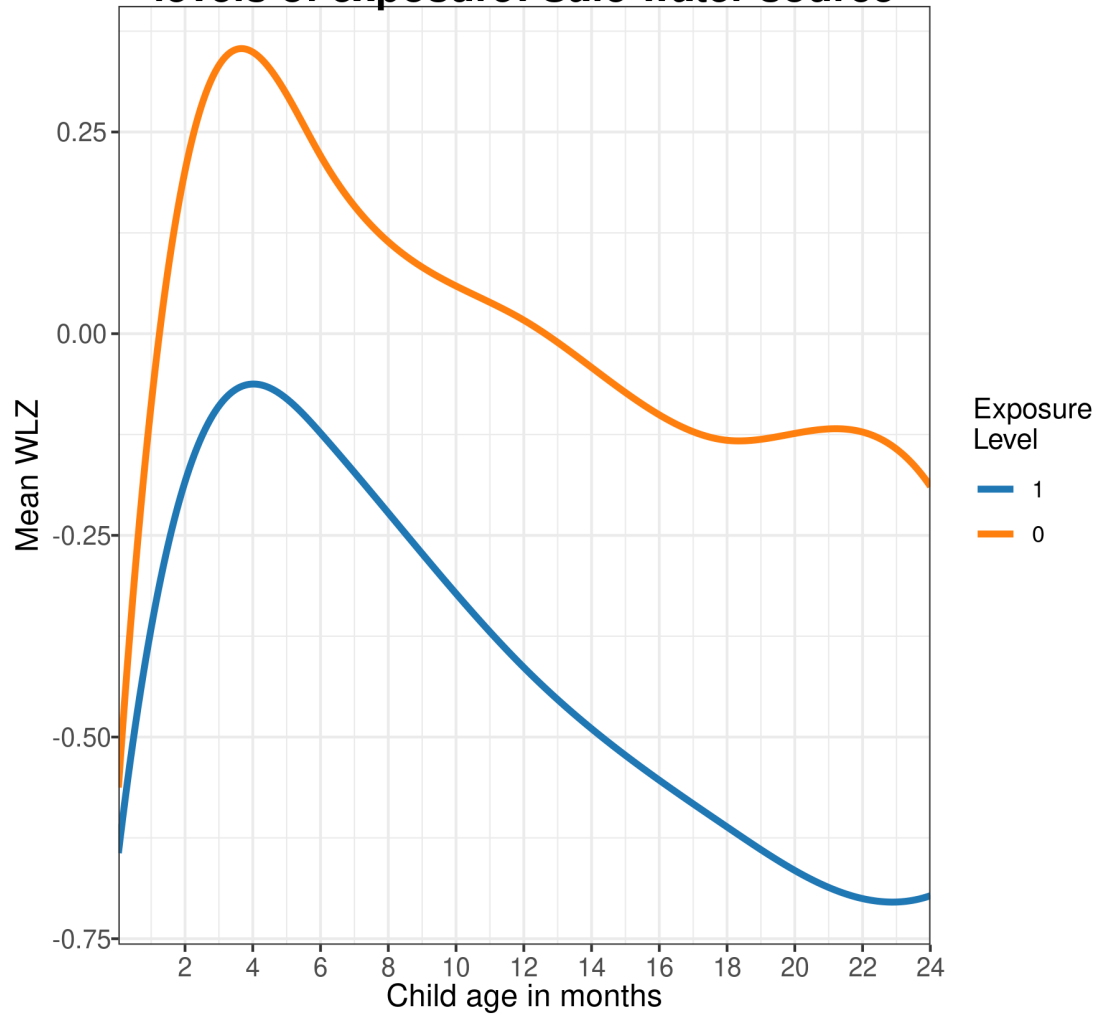



**Spline curves of WLZ stratified by levels of exposure: Sex**

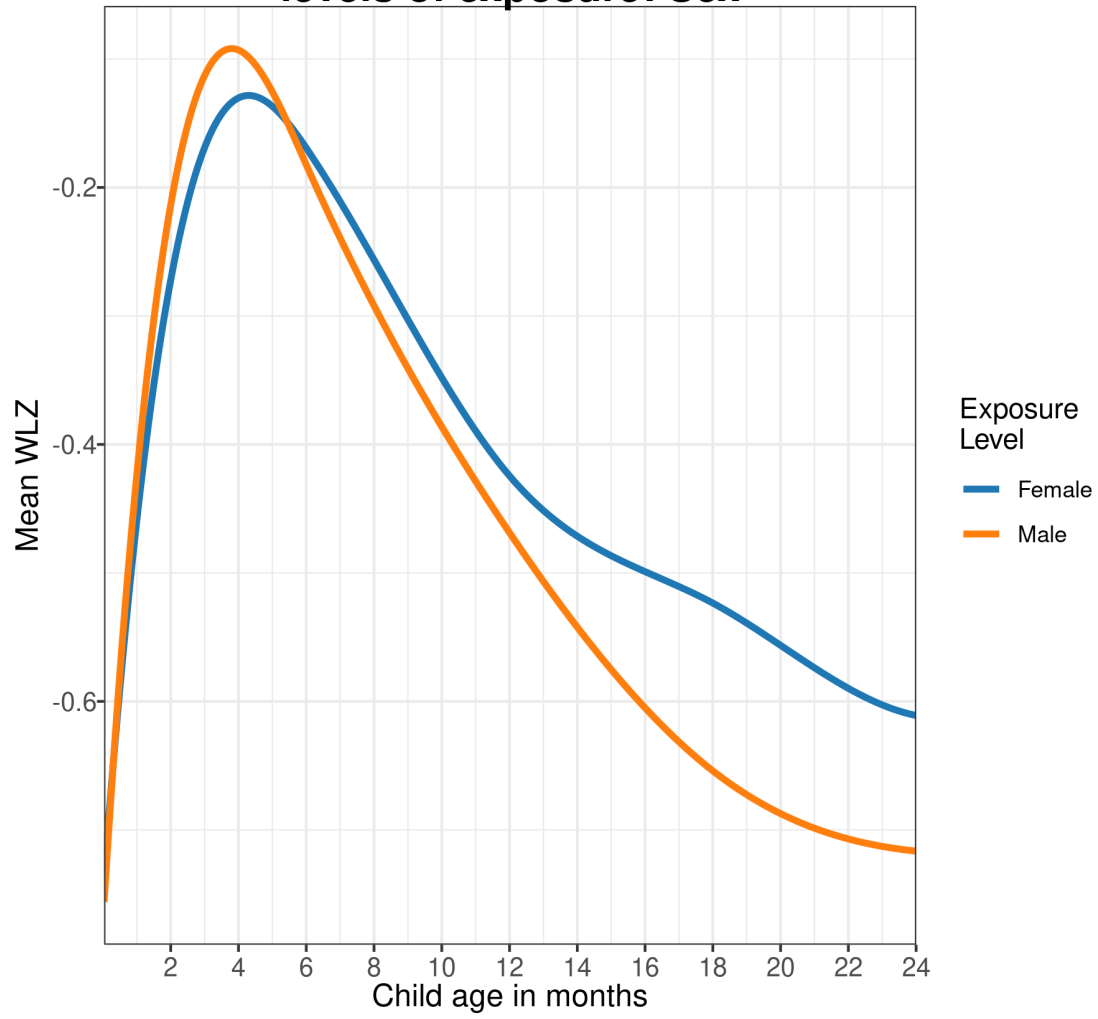

### Spline curves of WLZ stratified by levels of exposure: Single parent

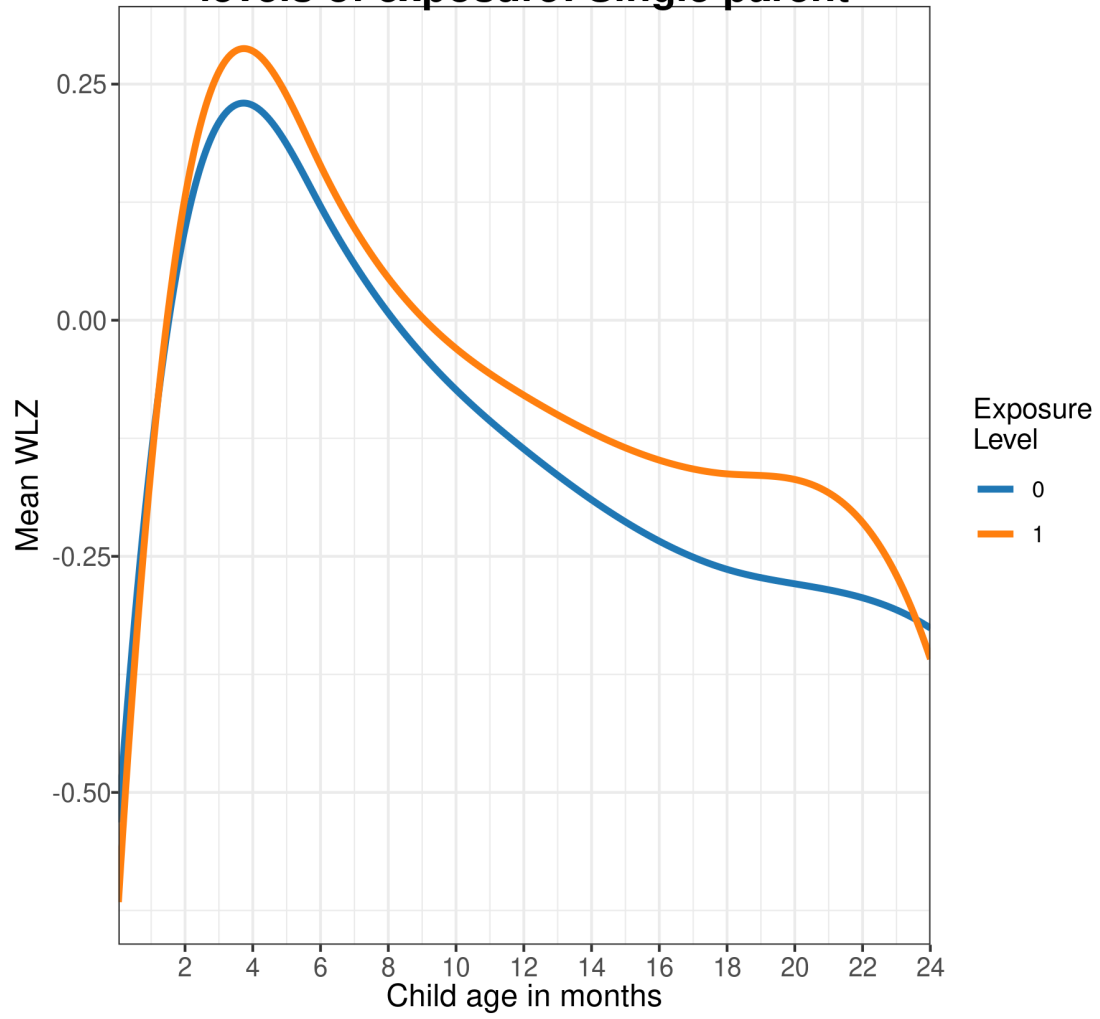

**Spline curves of WLZ stratified by levels of exposure: Treats drinking water**

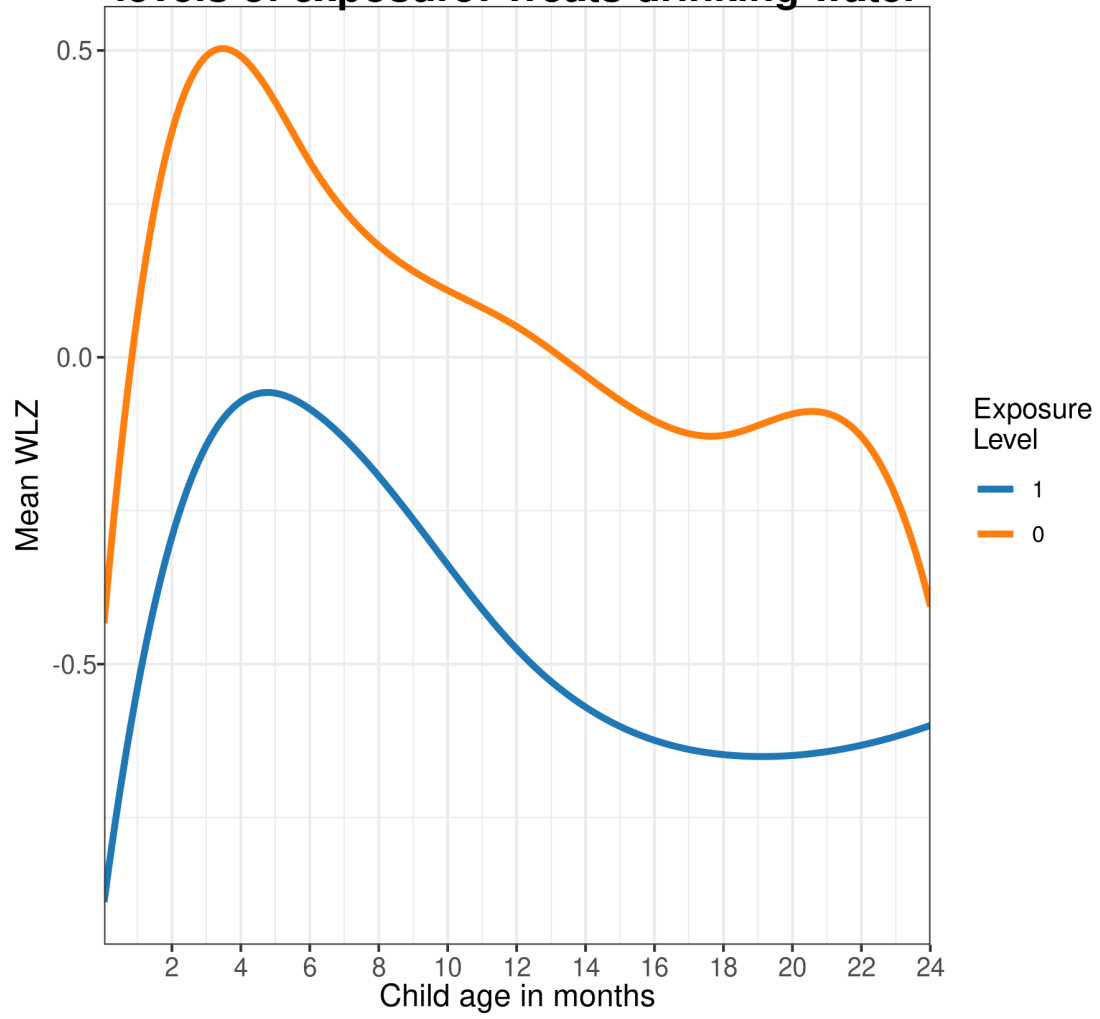

## Spline curves of WLZ stratified by levels of exposure: Vaginal birth

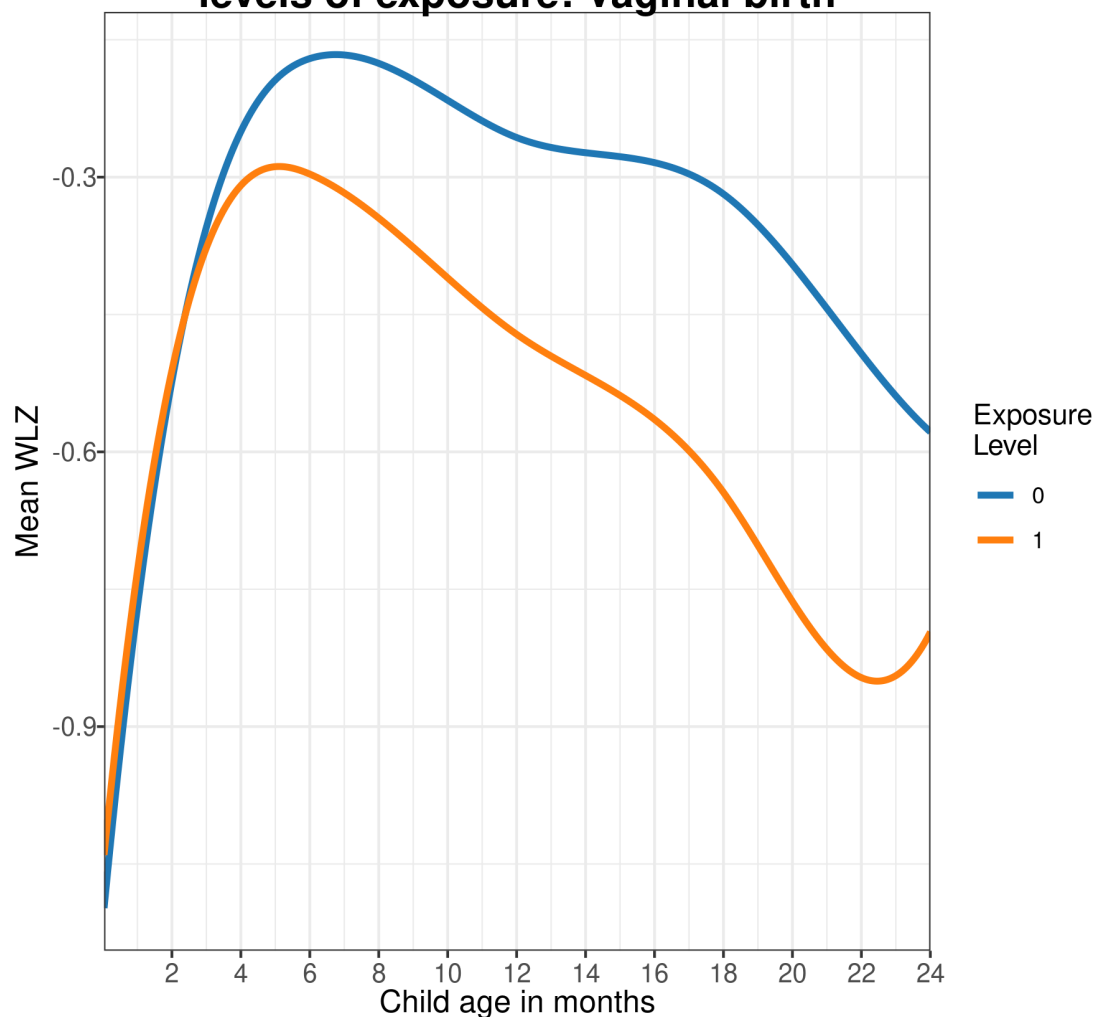

### Supplementary Note 6. Sensitivity to dropping PROBIT trial

#### 6.1 Overview

The PROBIT trial, conducted in Belarus, was the only study included conducted in Europe, as opposed to Latin America, South Asia, or sub-Saharan Africa. It was also one of the largest studies, so may have an influential effect on the pooled estimates. Because of differences in income, environmental conditions, and population anthropometry, we reconducted the primary analyses without the PROBIT trial and present the results here. We found that the exclusion of the PROBIT trial did not affect the main inferences presented in the manuscript.

## 6.2 Comparison of attributable differences estimated with and without the PROBIT trial

Because PROBIT was the only European study, we also conducted a sensitivity analysis as to the effect of removing PROBIT on attributable differences at 24 months (within the exposures measures during the PROBIT trial). Other than for the estimated associations between father’s height and child Z-scores at 24 months (which was measured in few other studies), PROBIT is not highly influential.

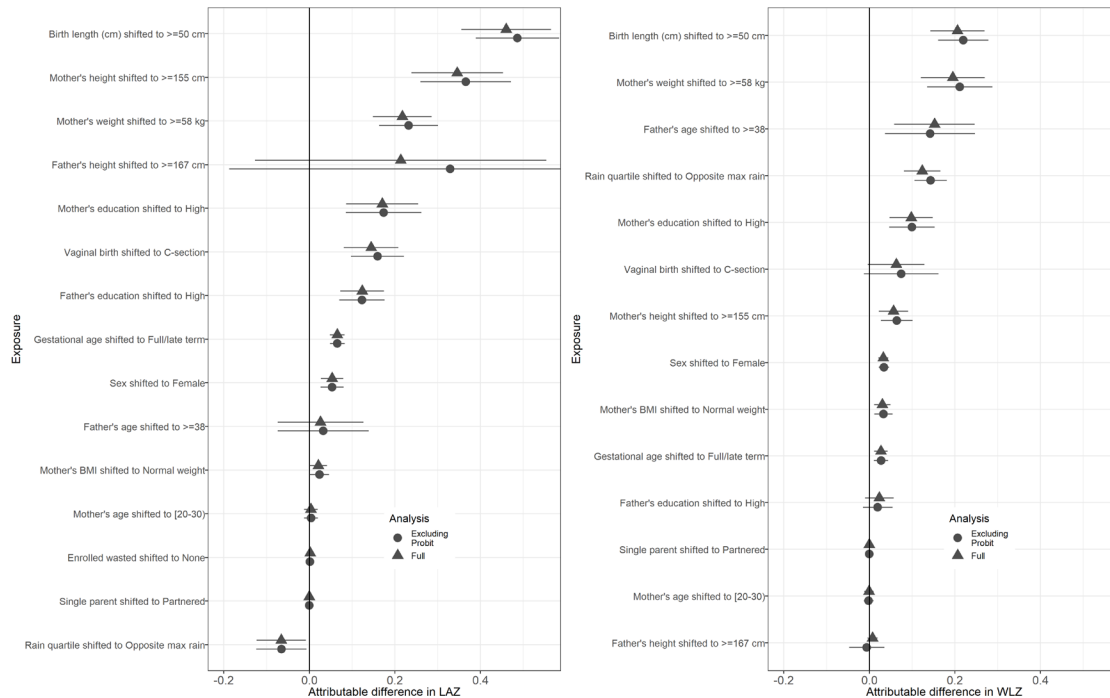

## Supplementary Note 7 Average treatment effect and relative risk plots

The primary parameter presented in the “Causes and Consequences of Child Growth Failure in Low- and Middle-income Countries” publications is the population intervention effect (PIE), the change in mean population Z-score if a exposure is shifted to the lowest-risk level, which combines the increase of risk associated with an exposure with the prevalence of the exposure in the population. This page of the supporting information presents plots for pooled relative risks (RR) and average treatment effects (ATE) for each level of each exposure (all the estimates shown in “Extended Data Figure 2. Heatmap of significance and direction across exposure-outcome combinations”, but presented here with point estimates and confidence intervals). Relative risk are reported for binary CGF outcomes (stunting, wasting, underweight, severe stunting, severe wasting, and severe underweight) and ATEs (mean differences) are reported for continuous Z-score outcomes.

The primary purpose of this page is to present the pooled point estimates and confidence intervals for all of the results summarized in the Extended Data Figure 2 heatmap, and to allow the reader to compare the levels of risk across categorical exposures. The population intervention effects and attributable

fraction presented in the primary manuscript show the result when shifting the exposure distribution to

the low-risk reference levels, but the results presented here allow for comparing other exposure levels, like food secure versus moderately food insecure.

Plots are grouped and titled by exposure and growth outcome, and each panel of grouped plots visualizes the relative risk between levels of the exposure and different age-specific growth failure outcomes. Reference levels are printed in the titles after "ref:".

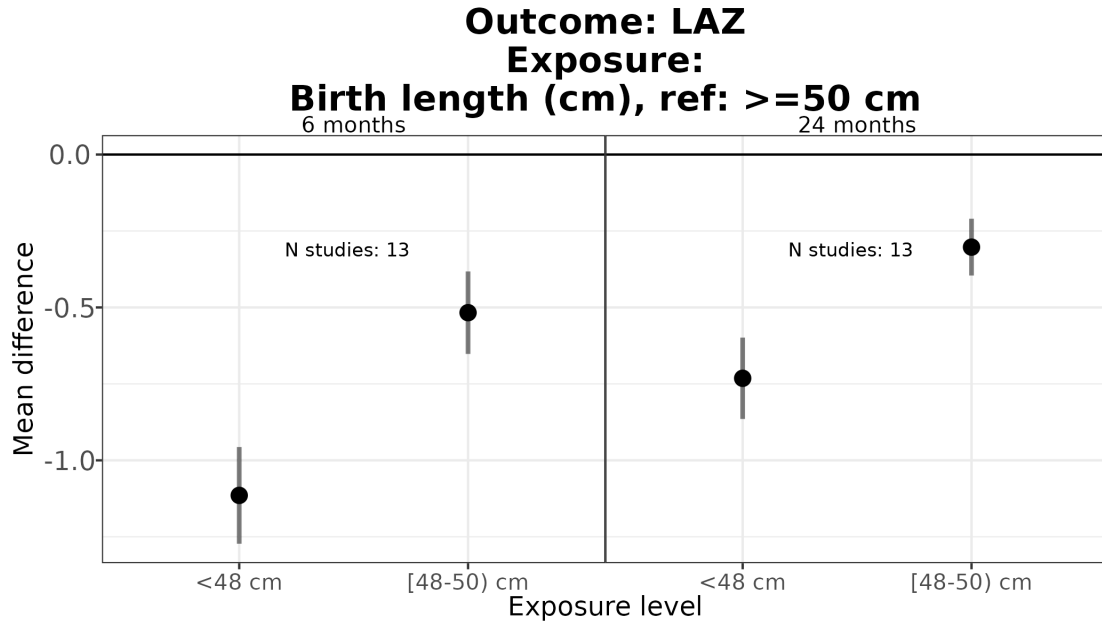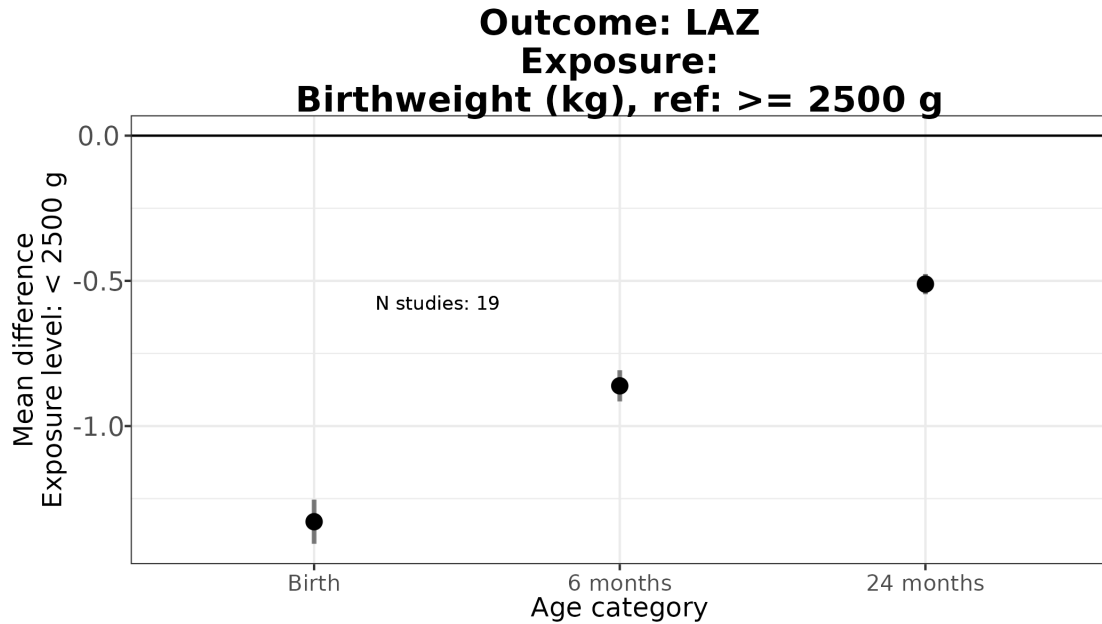

**Outcome: LAZ**  
**Exposure:**  
**Clean cooking fuel usage, ref: Yes**

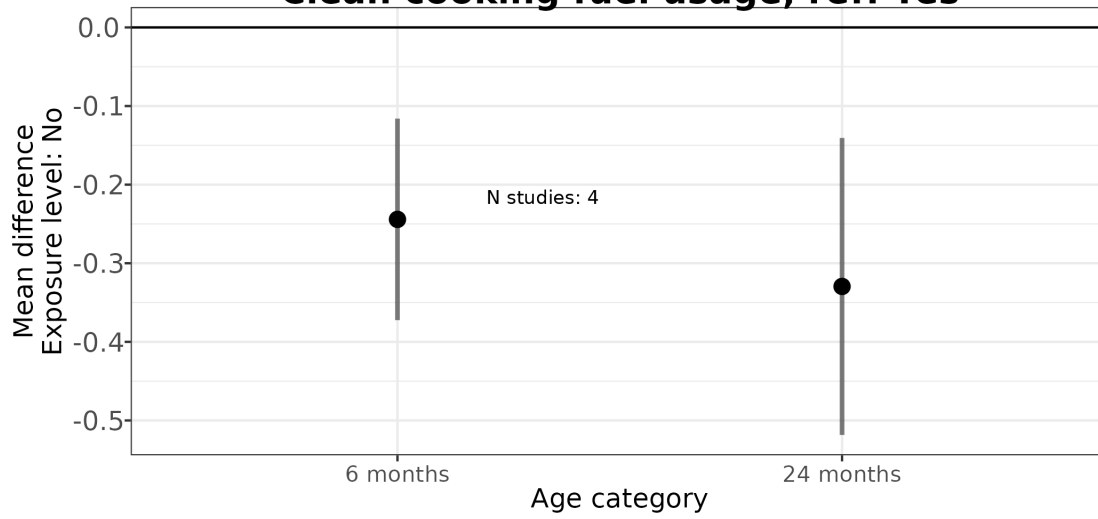

**Outcome: LAZ**  
**Exposure:**  
**Breastfed hour after birth, ref: Yes**

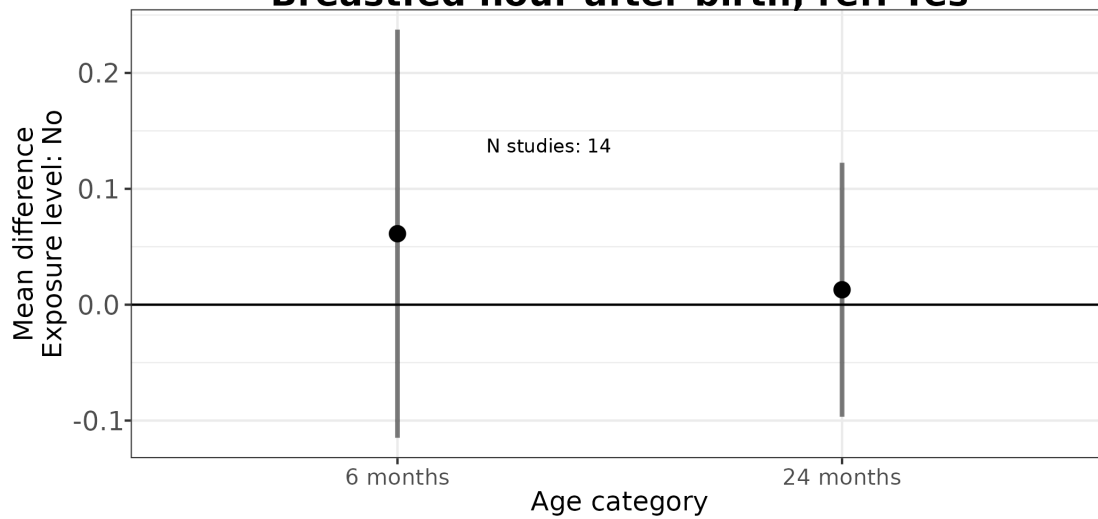

**Outcome: LAZ**  
**Exposure:**  
**Father's age, ref: >=35**

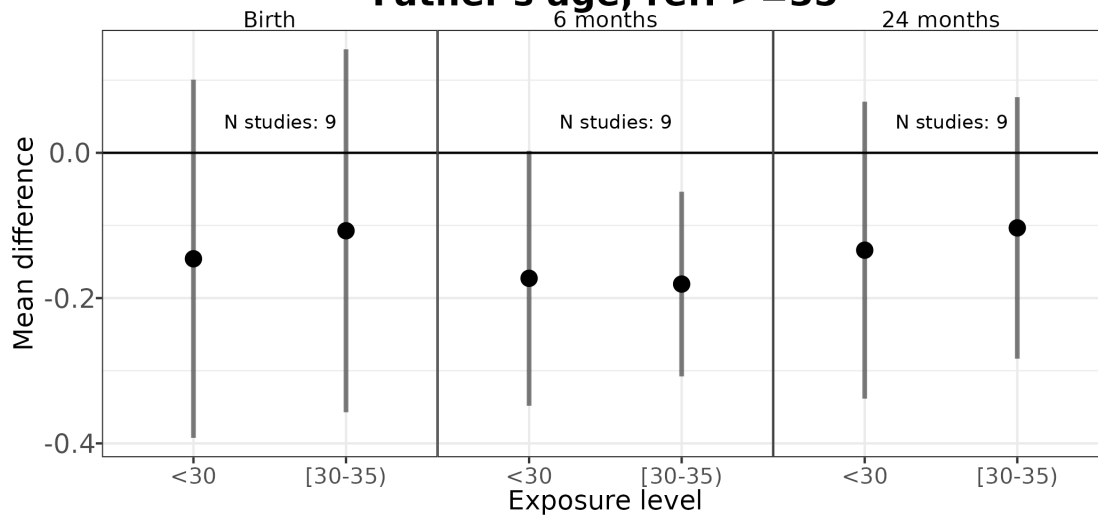

**Outcome: LAZ**  
**Exposure:**  
**Father's education, ref: High**

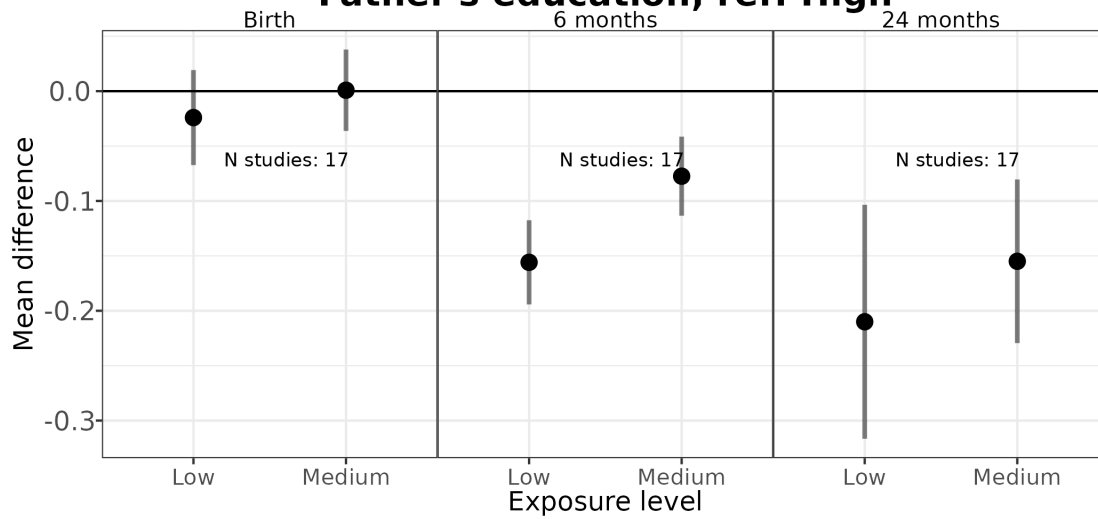



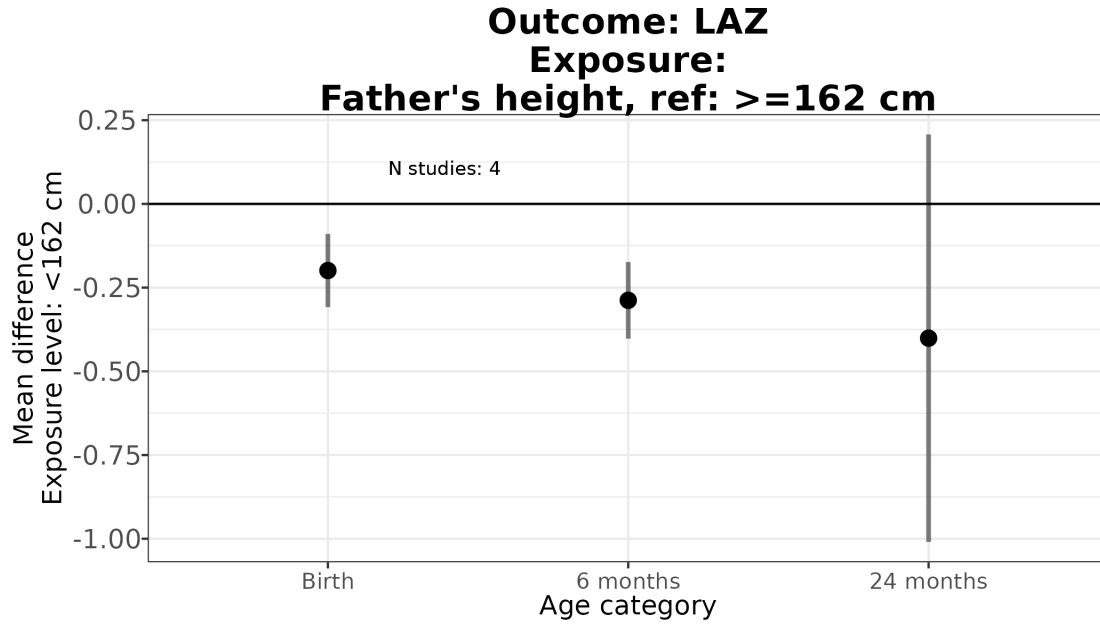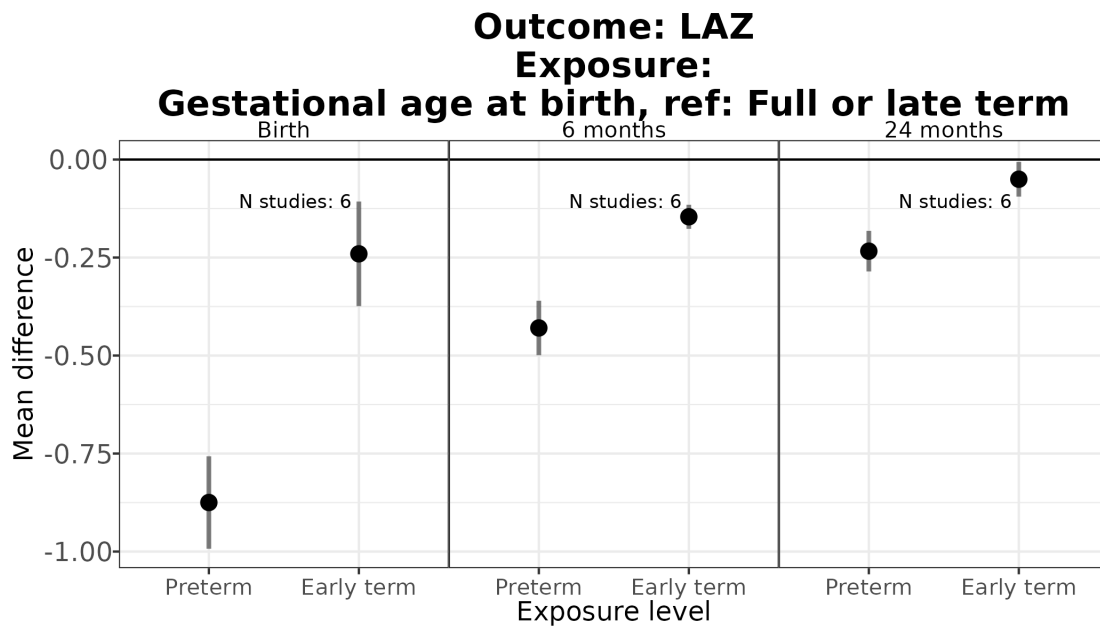

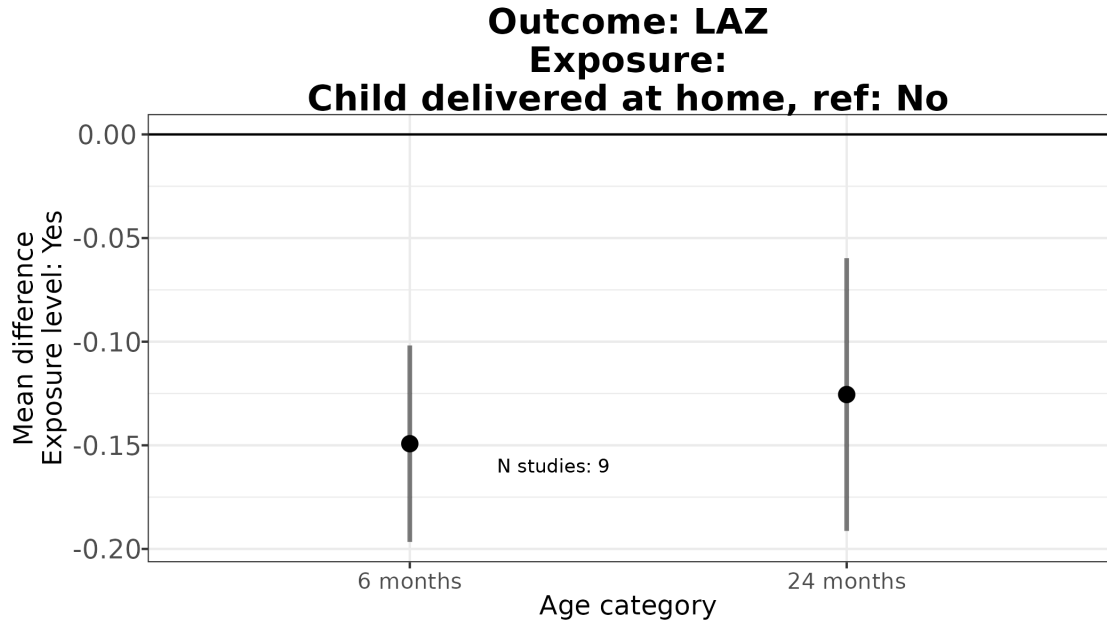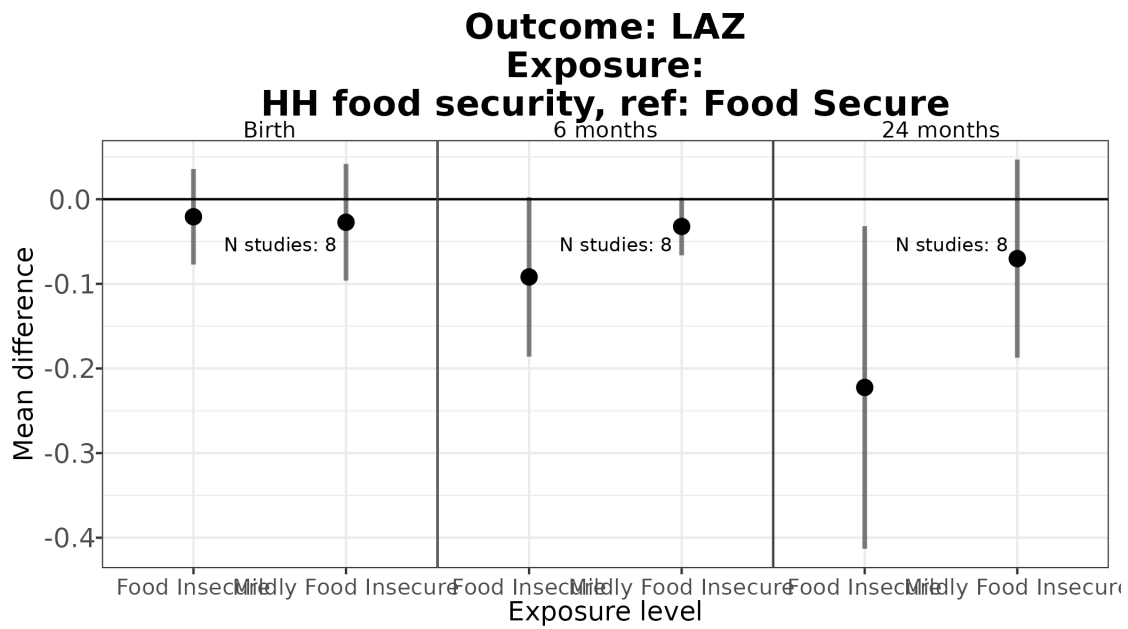

**Outcome: LAZ**  
**Exposure:**  
**HH wealth, ref: Q4**

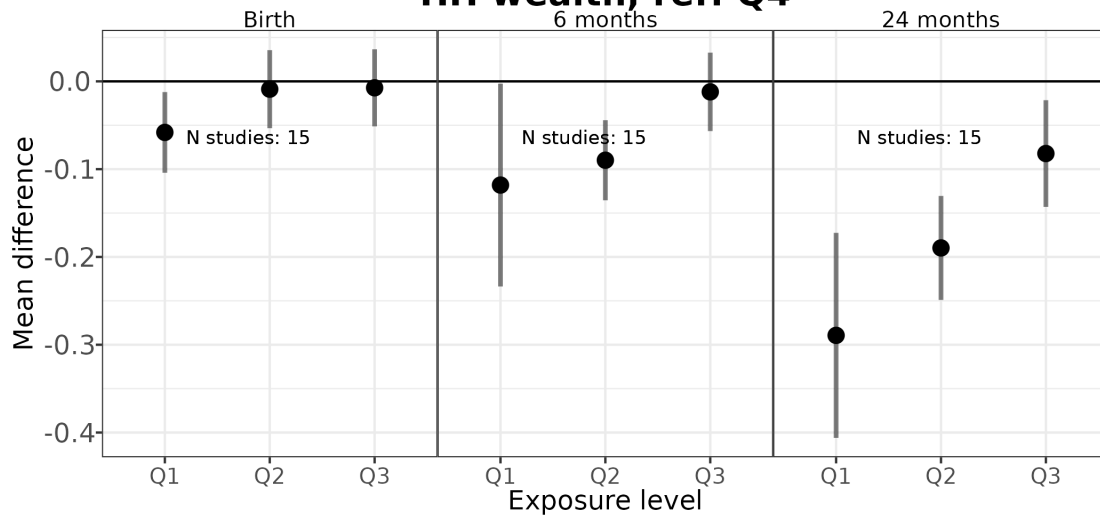

**Outcome: LAZ**  
**Exposure:**  
**Improved floor, ref: Yes**

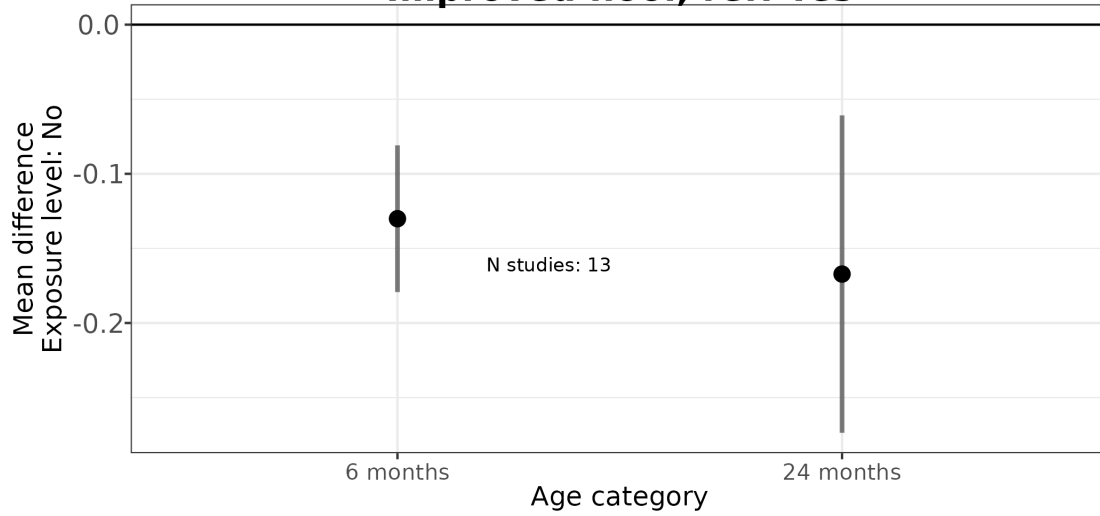

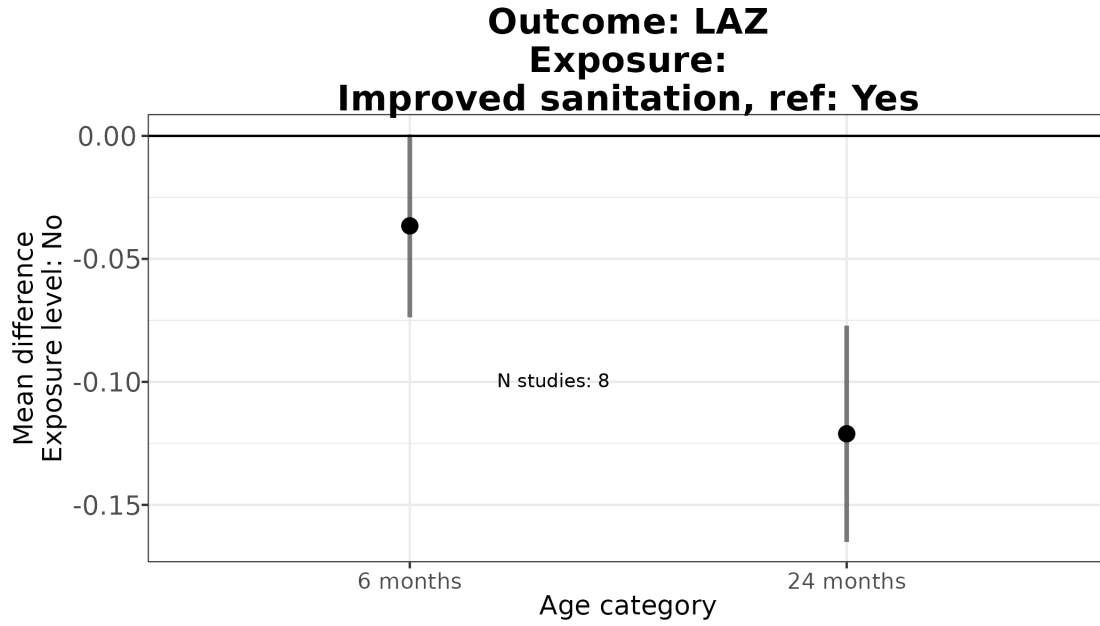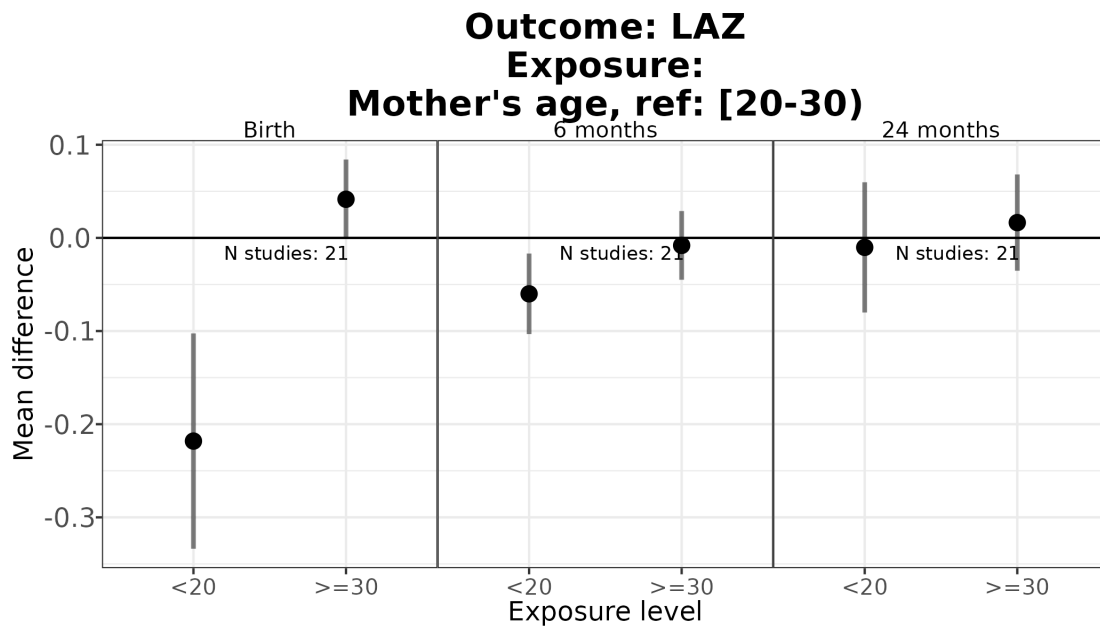

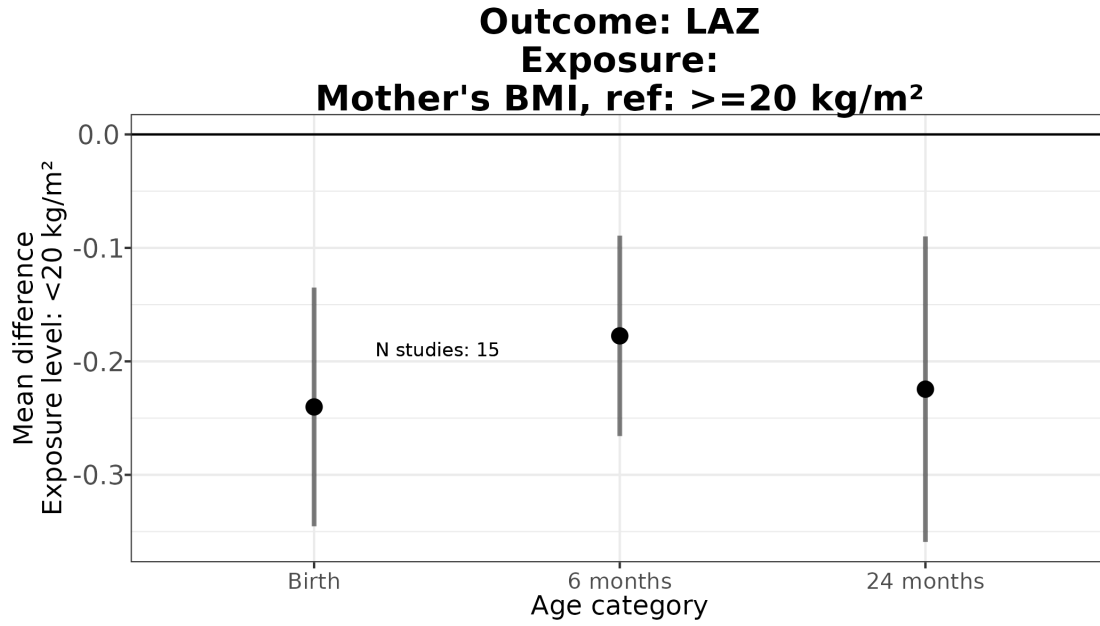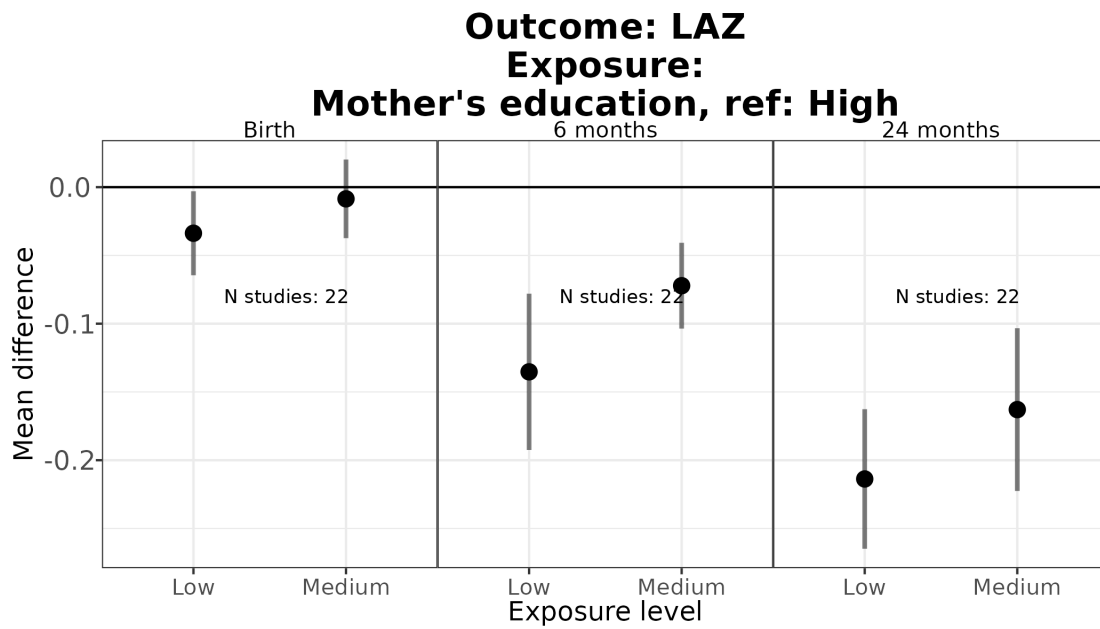

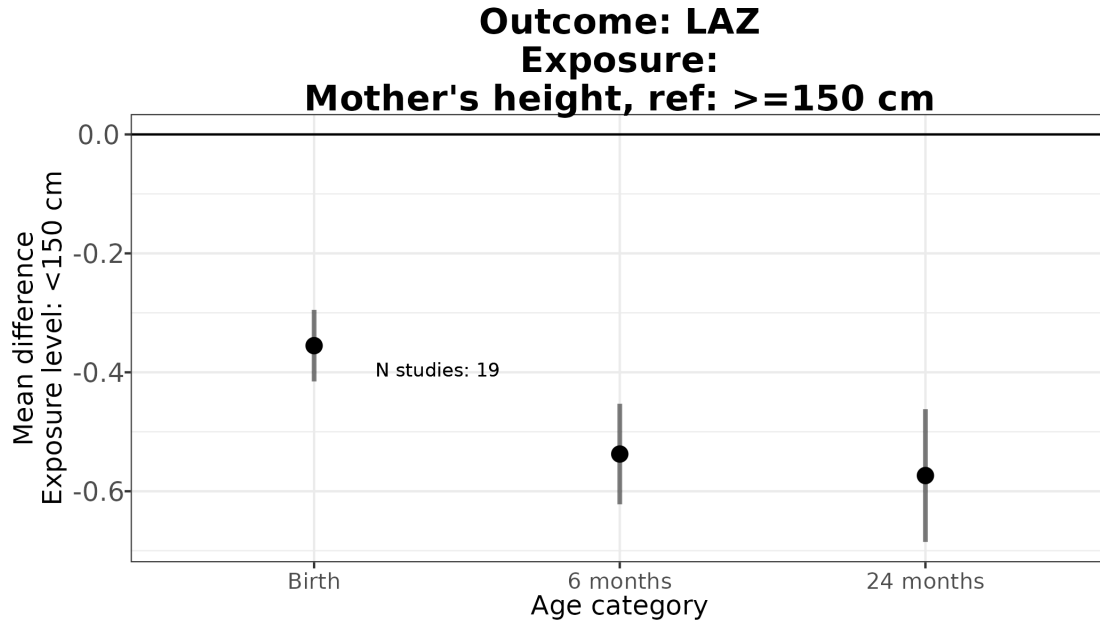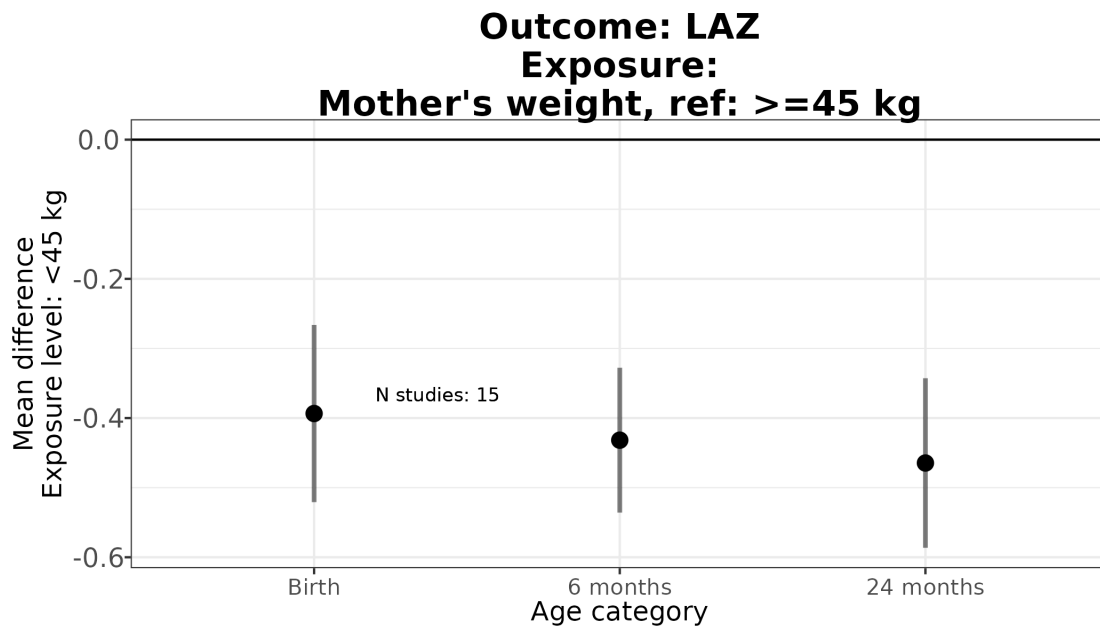

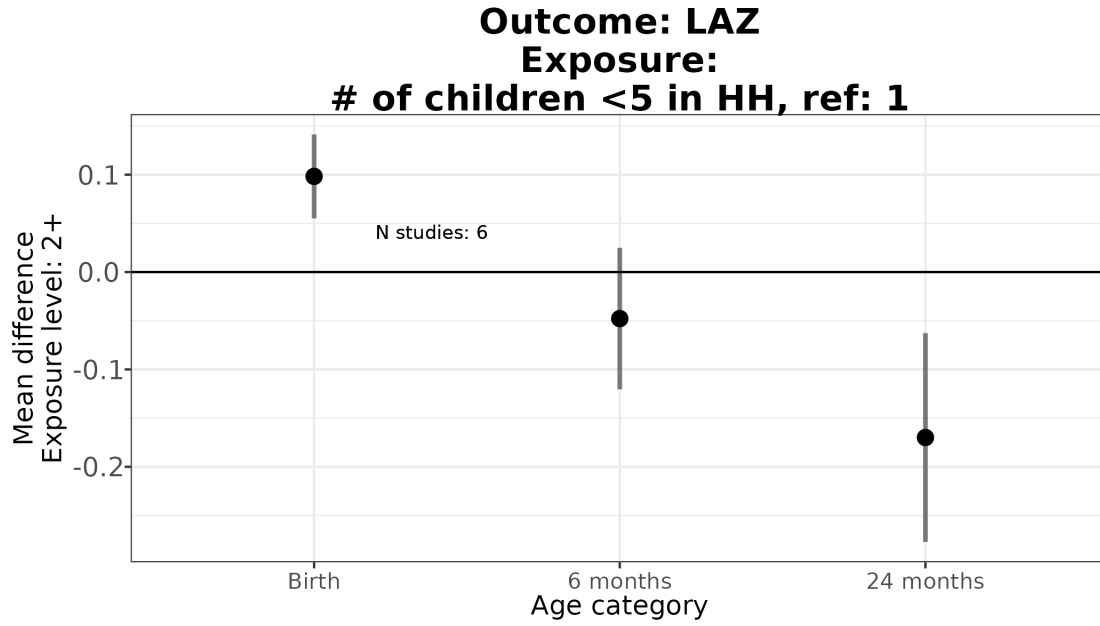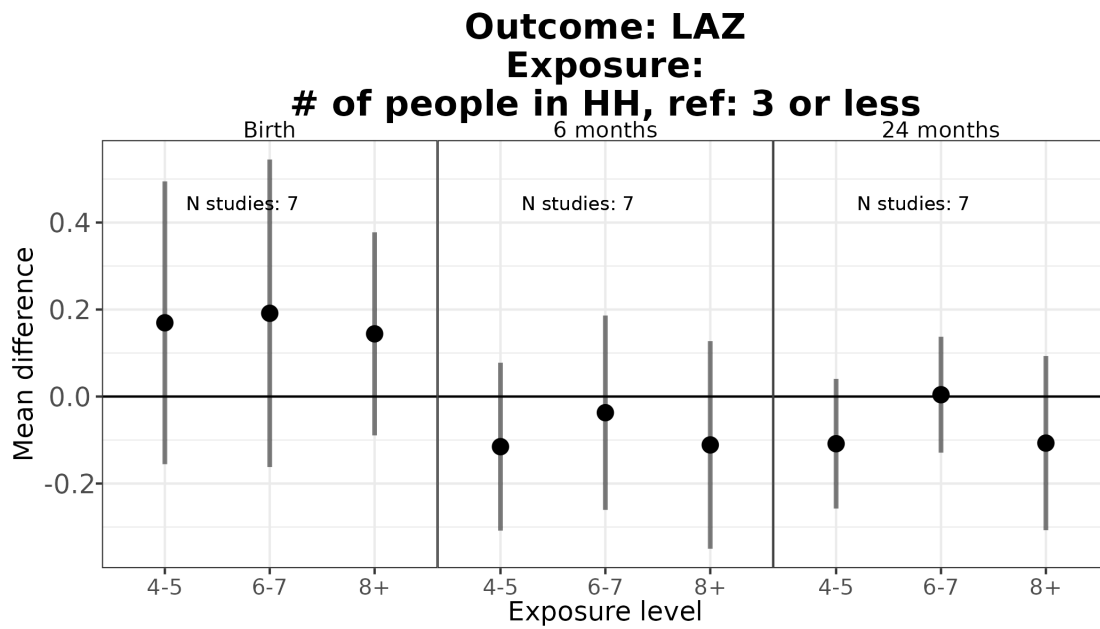

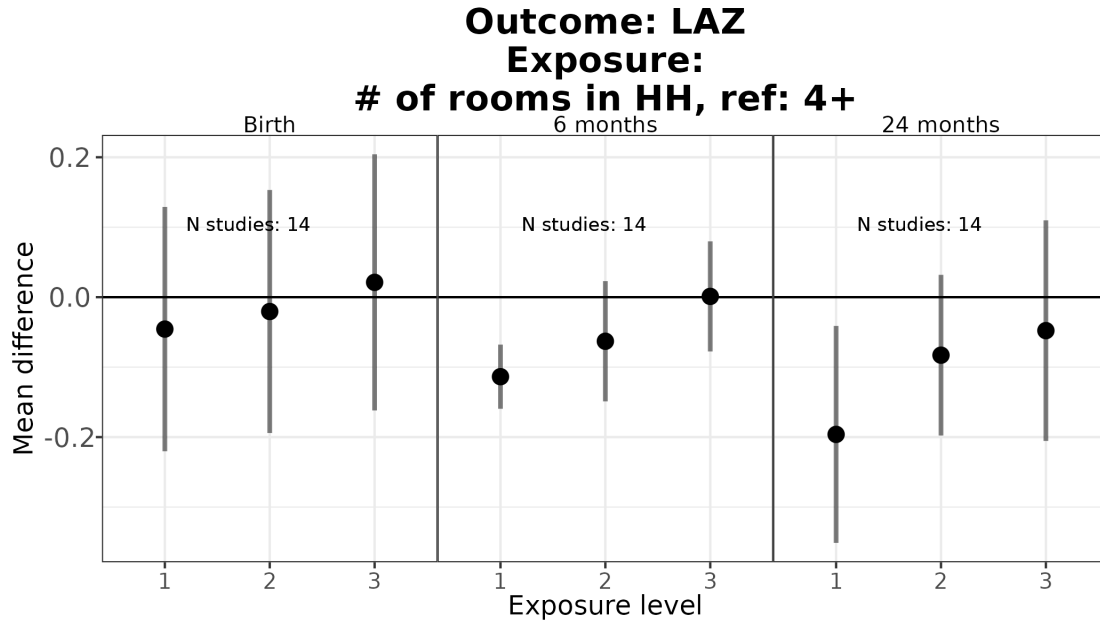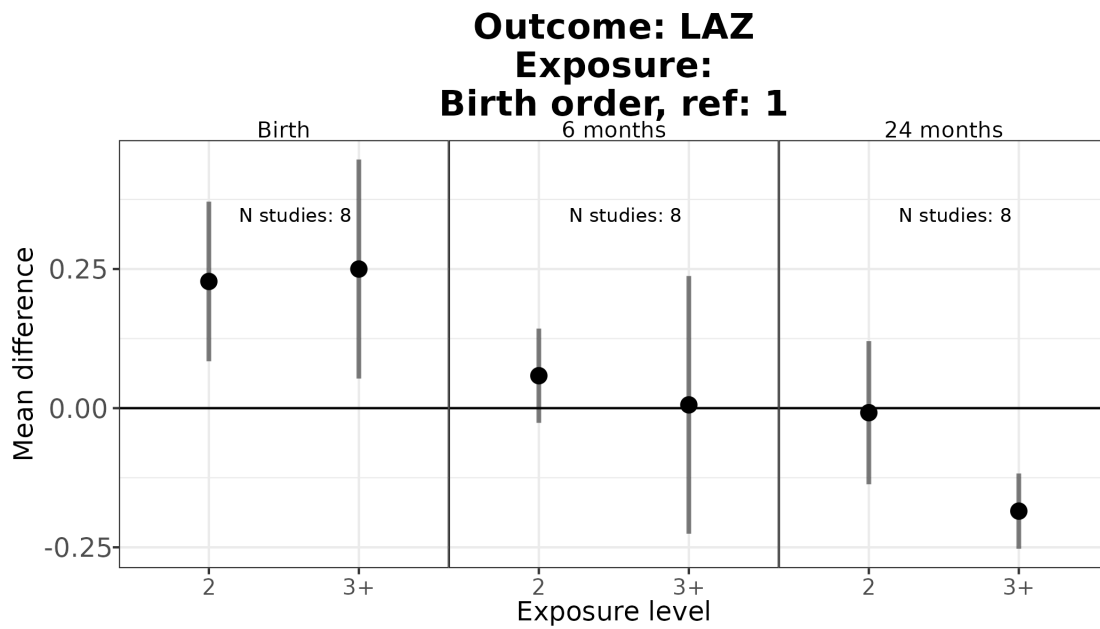



**Outcome: LAZ**  
**Exposure:**  
**Diarrhea <6 mo. (% days), ref: [0%, 2%]**

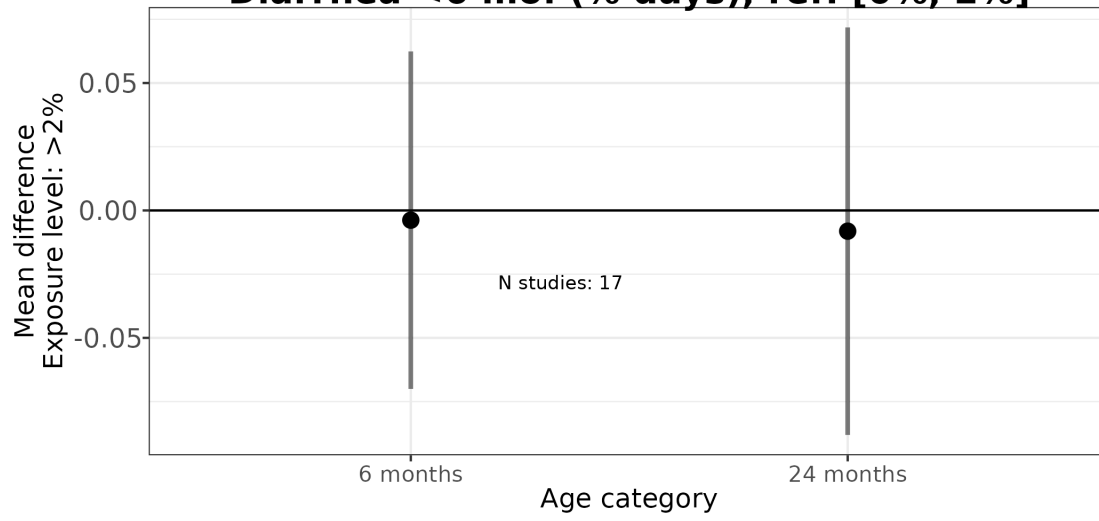

**Outcome: LAZ**  
**Exposure:**  
**Excl/Pred breastfed <6mo., ref: Yes**

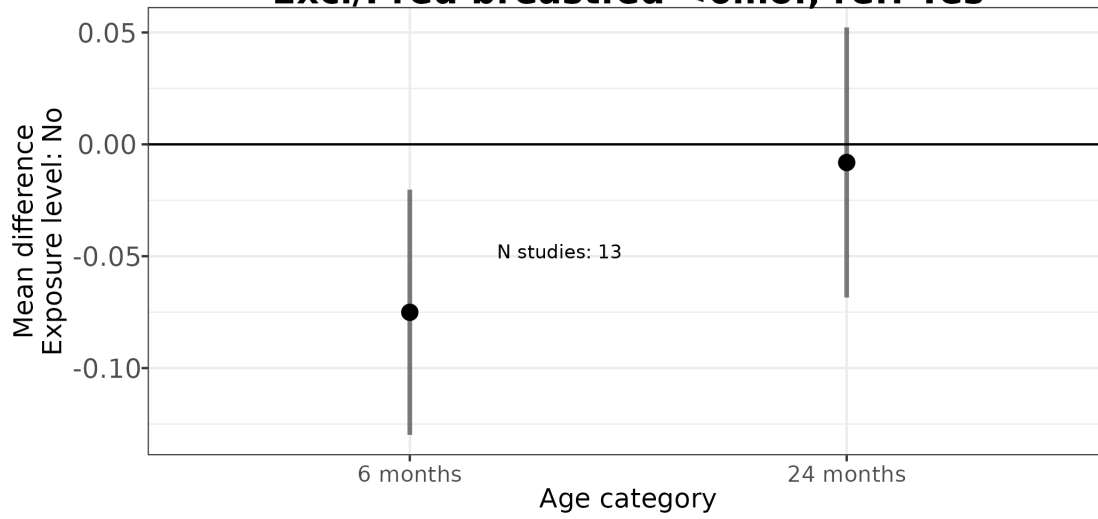

**Outcome: LAZ**  
**Exposure:**  
**Rain quartile, ref: Opposite max rain**

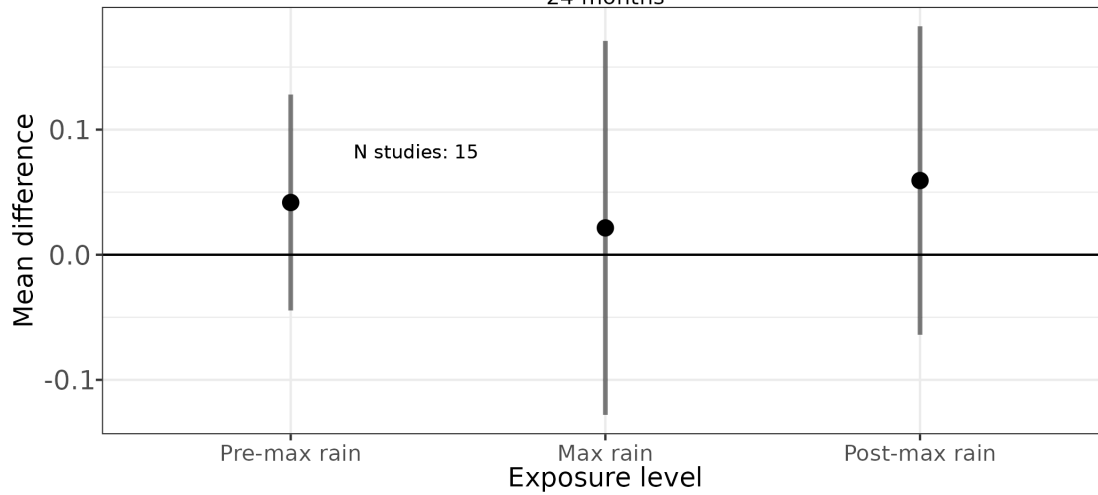

**Outcome: LAZ**  
**Exposure:**  
**Safe water source, ref: Yes**

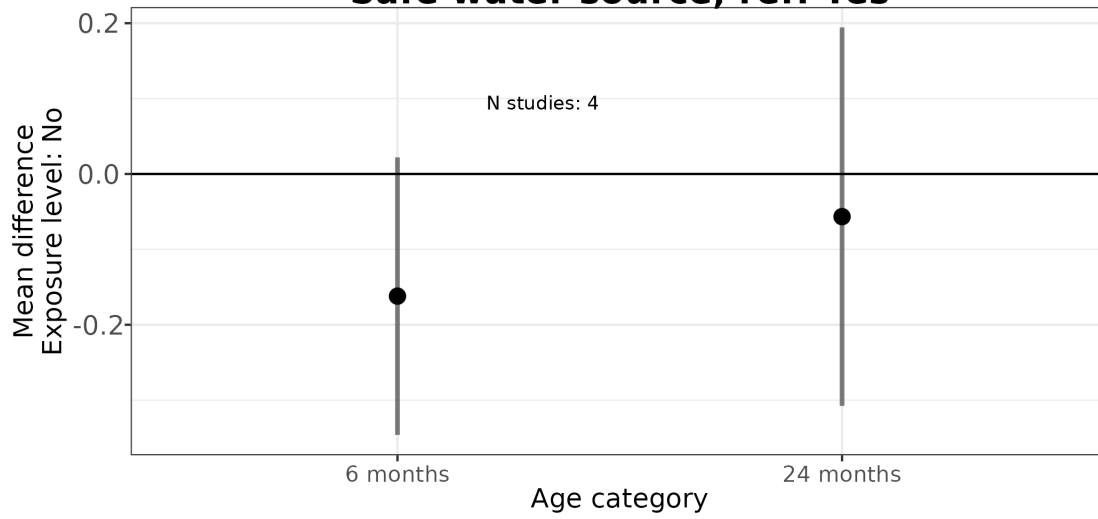

**Outcome: LAZ**  
**Exposure:**  
**Sex, ref: Female**

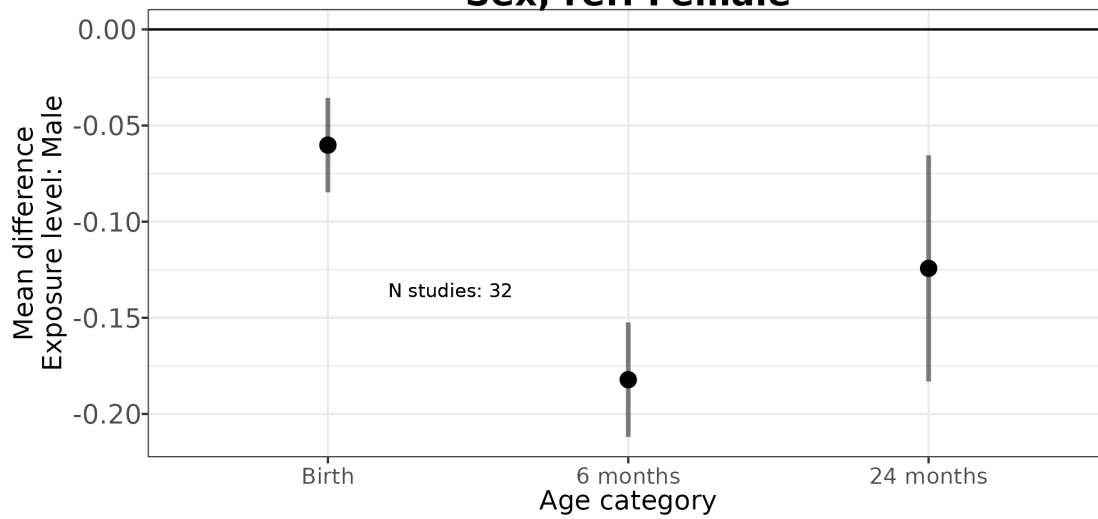

**Outcome: LAZ**  
**Exposure:**  
**Small-for-gestational age, ref: Not SGA**

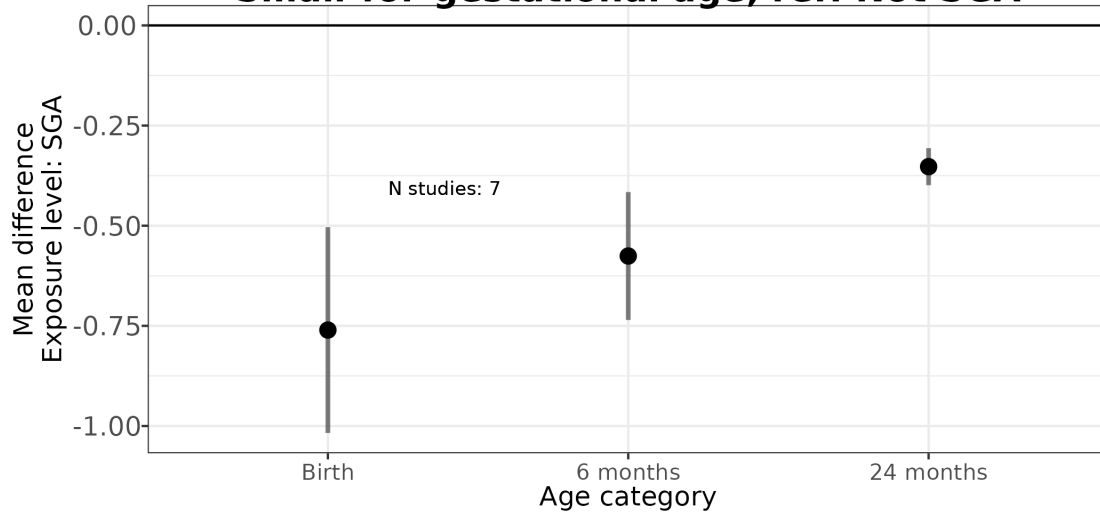

**Outcome: LAZ**  
**Exposure:**  
**Single parent, ref: 0**

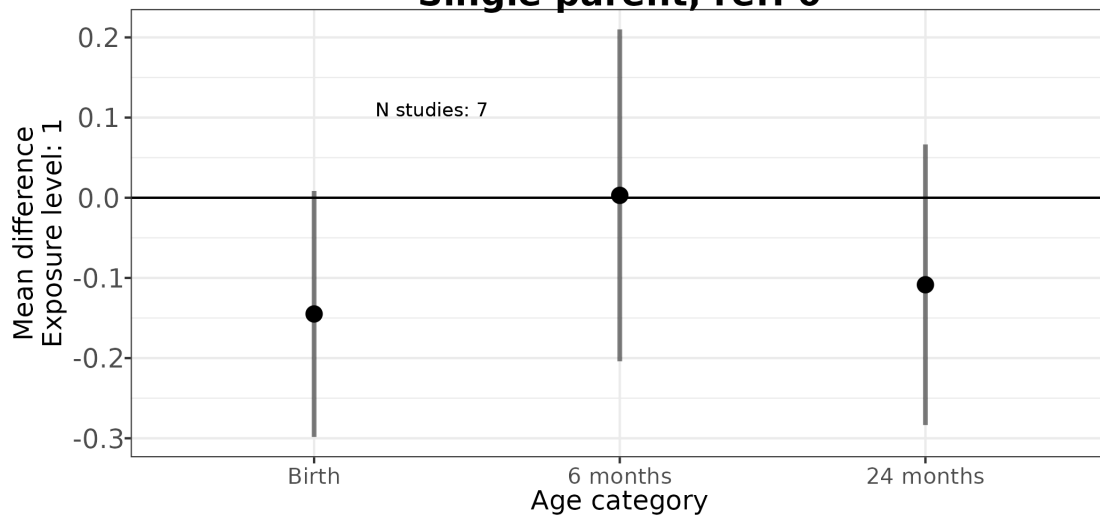

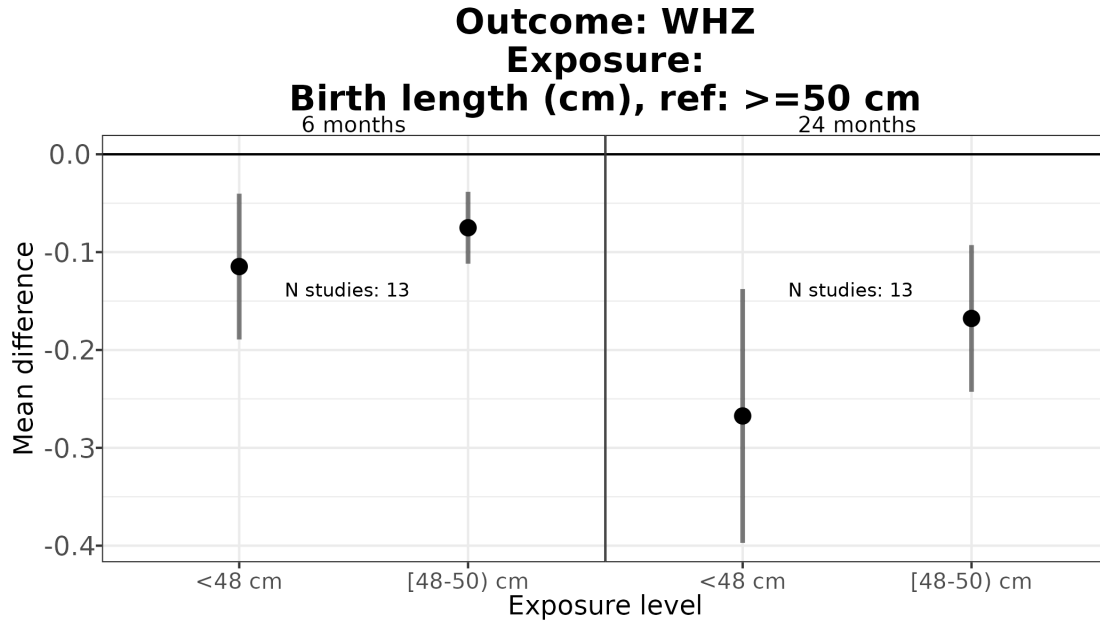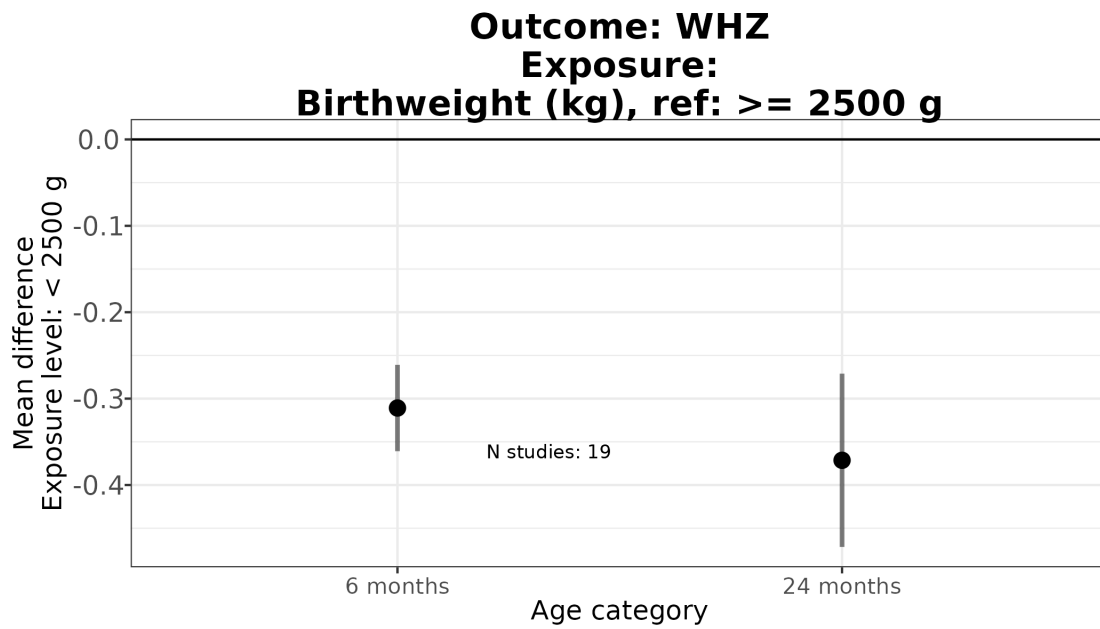

**Outcome: WHZ**  
**Exposure:**  
**Clean cooking fuel usage, ref: Yes**

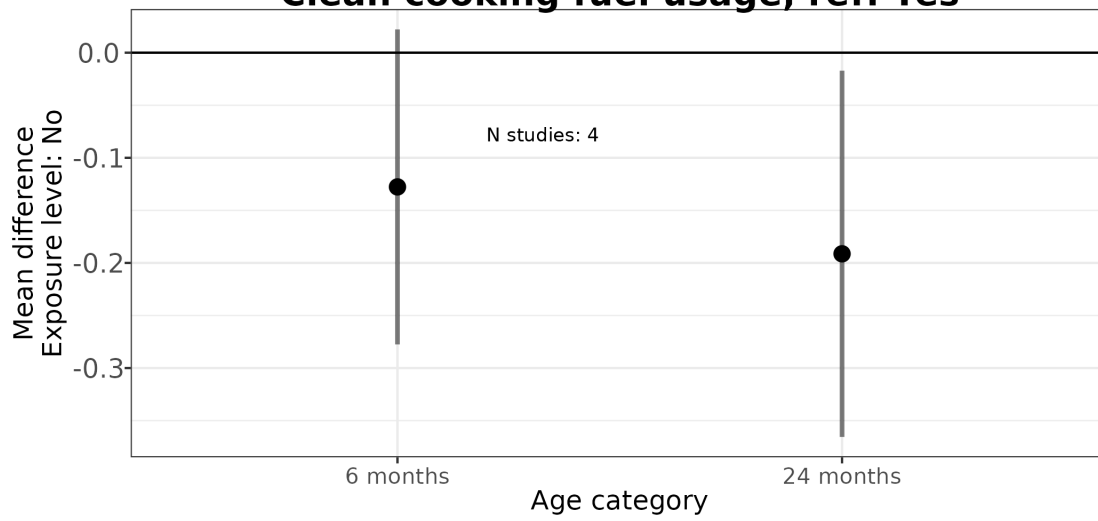

**Outcome: WHZ**  
**Exposure:**  
**Breastfed hour after birth, ref: Yes**

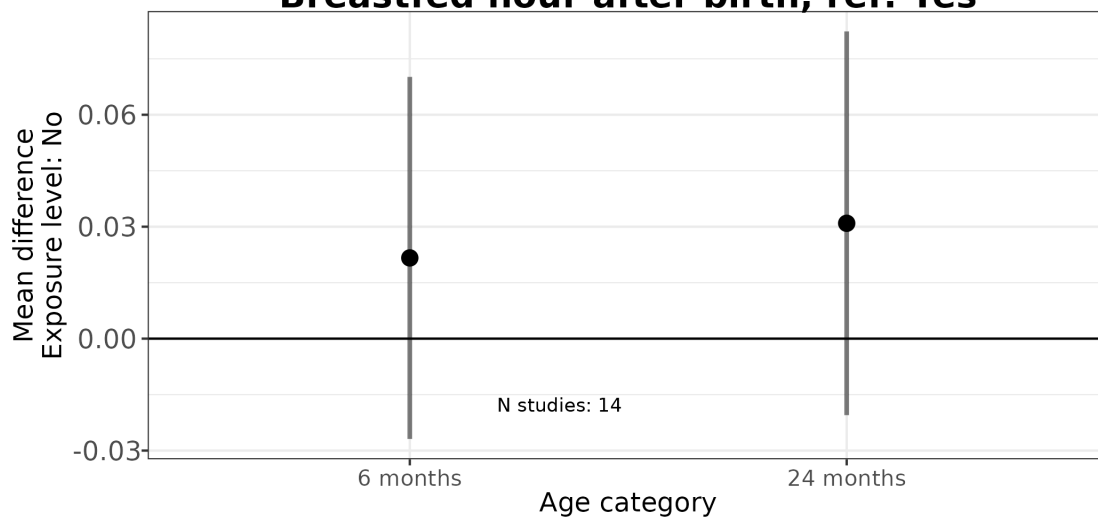

**Outcome: WHZ**  
**Exposure:**  
**Father's age, ref:  $\geq 35$**

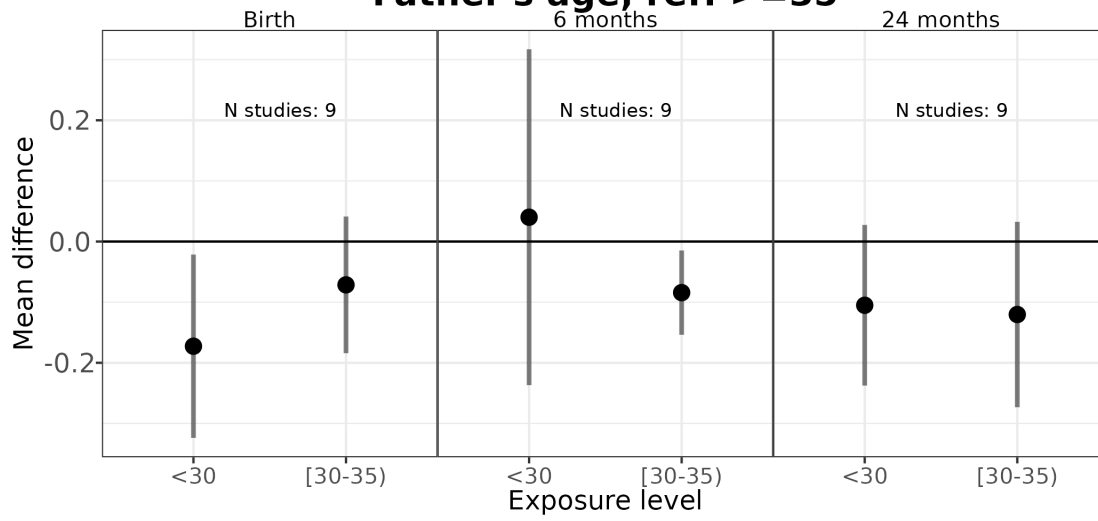

**Outcome: WHZ**  
**Exposure:**  
**Father's education, ref: High**

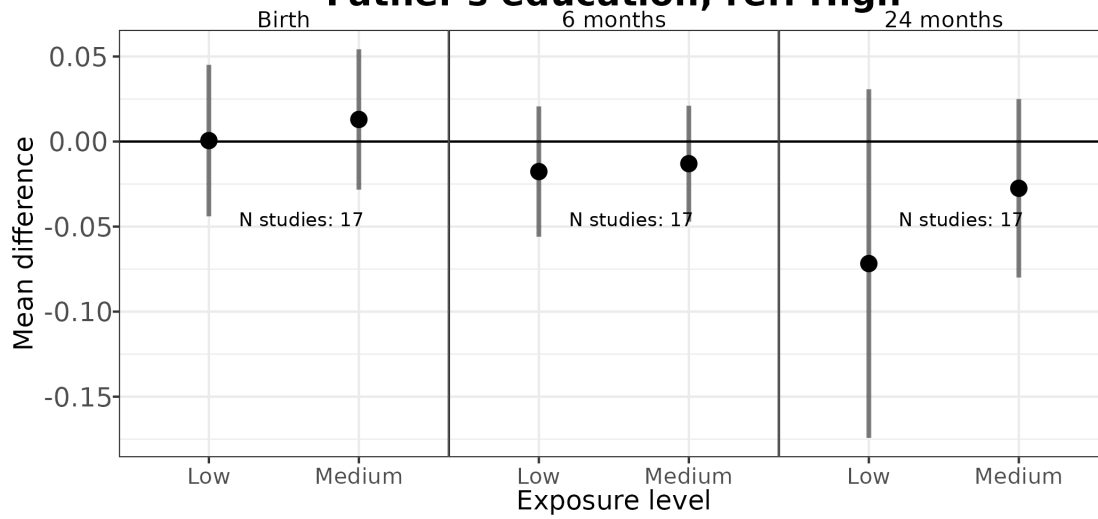

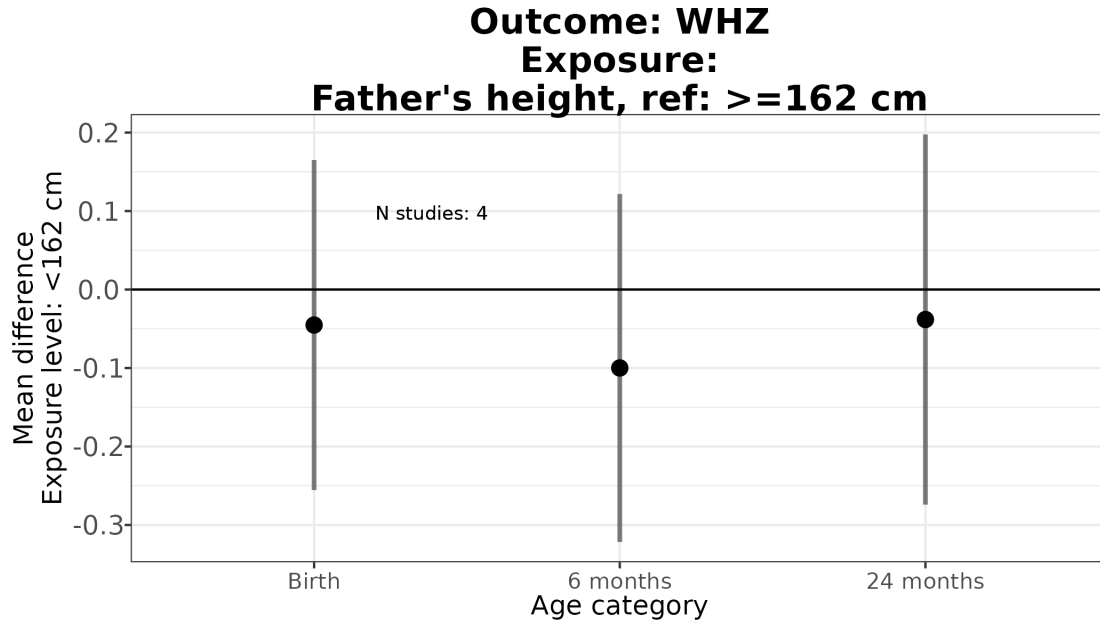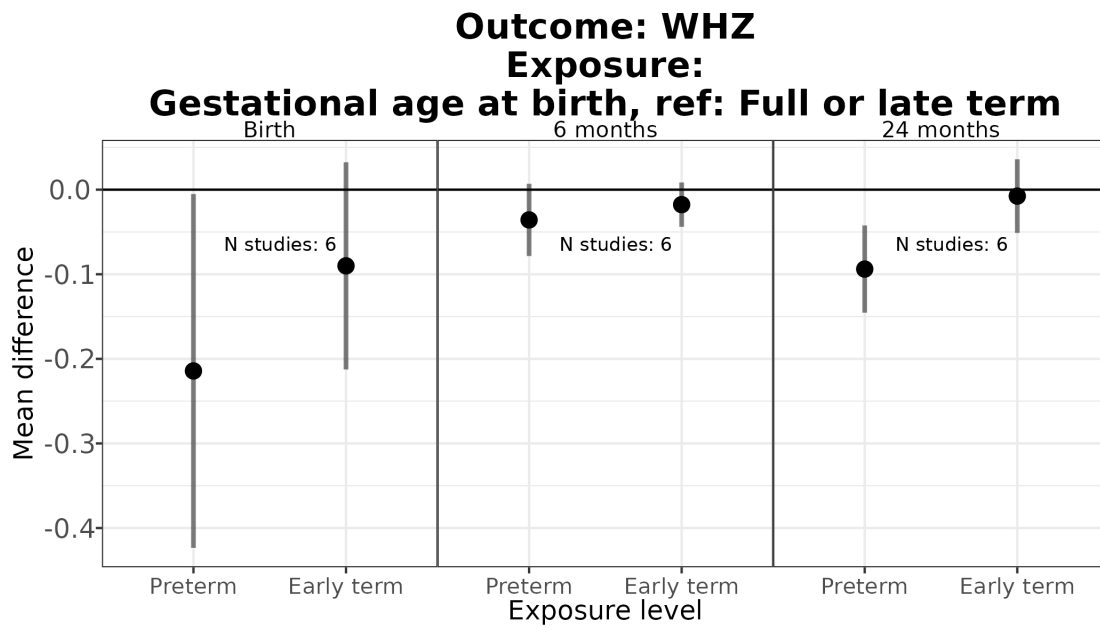



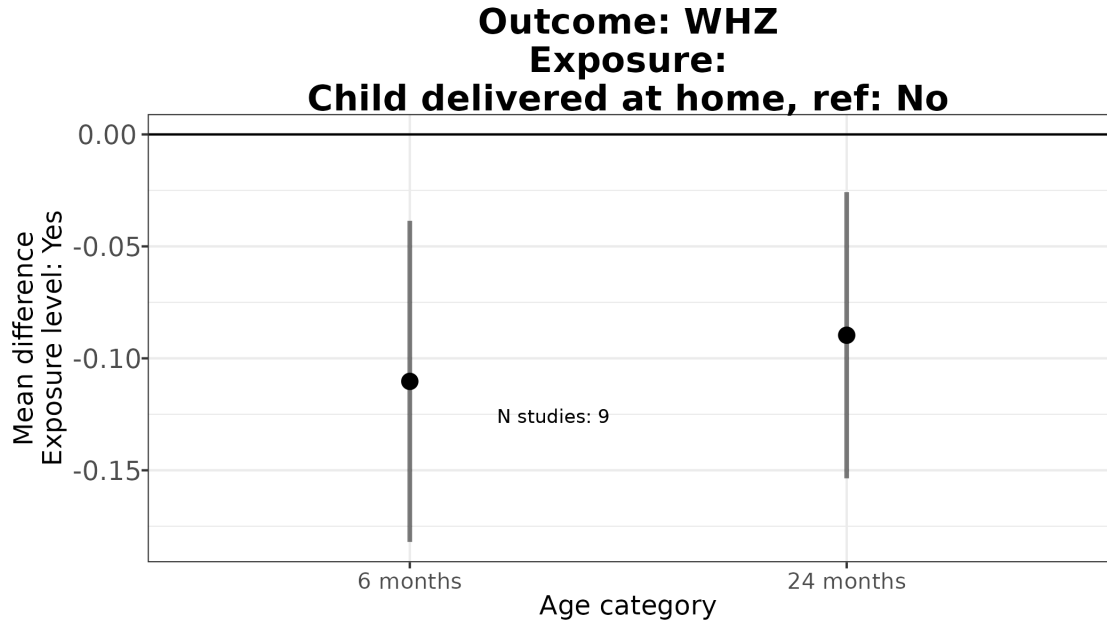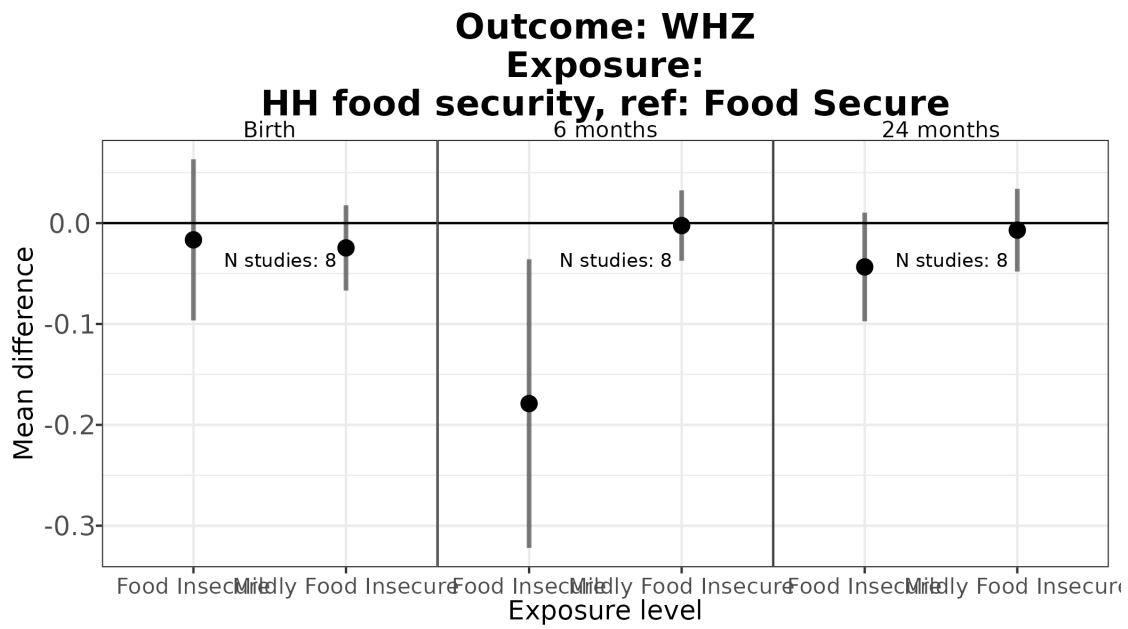

**Outcome: WHZ**  
**Exposure:**  
**HH wealth, ref: Q4**

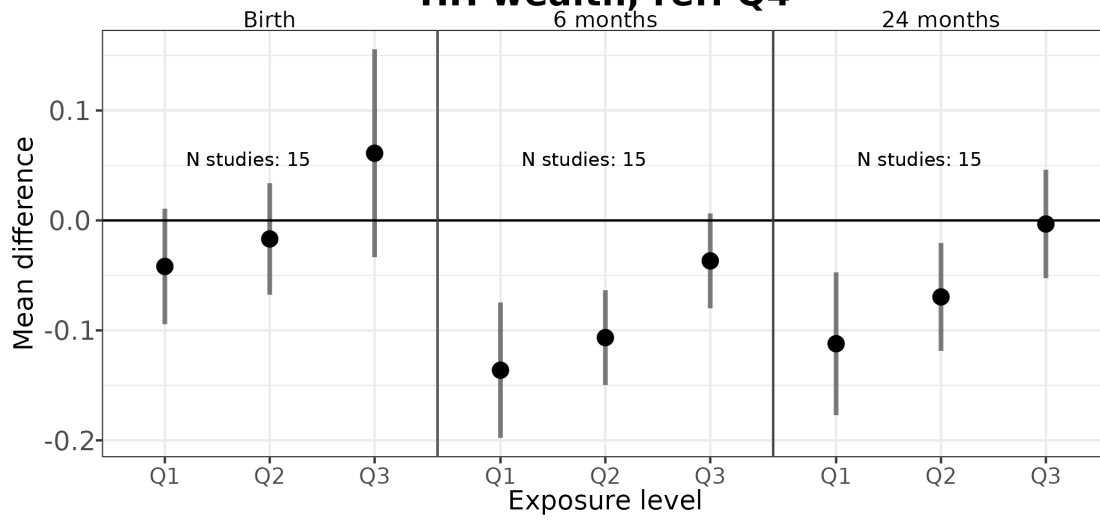

**Outcome: WHZ**  
**Exposure:**  
**Improved floor, ref: Yes**

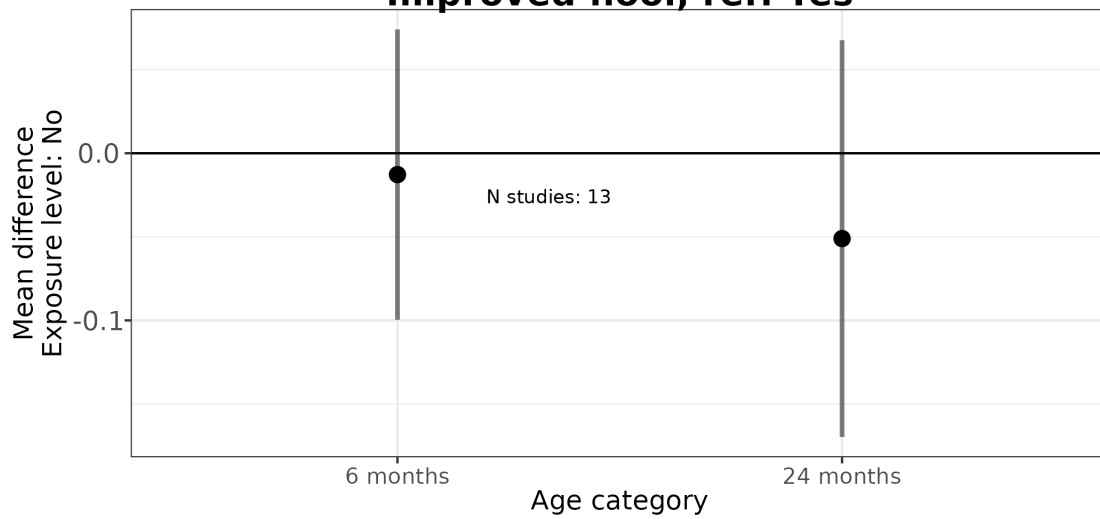

**Outcome: WHZ**  
**Exposure:**  
**Improved sanitation, ref: Yes**

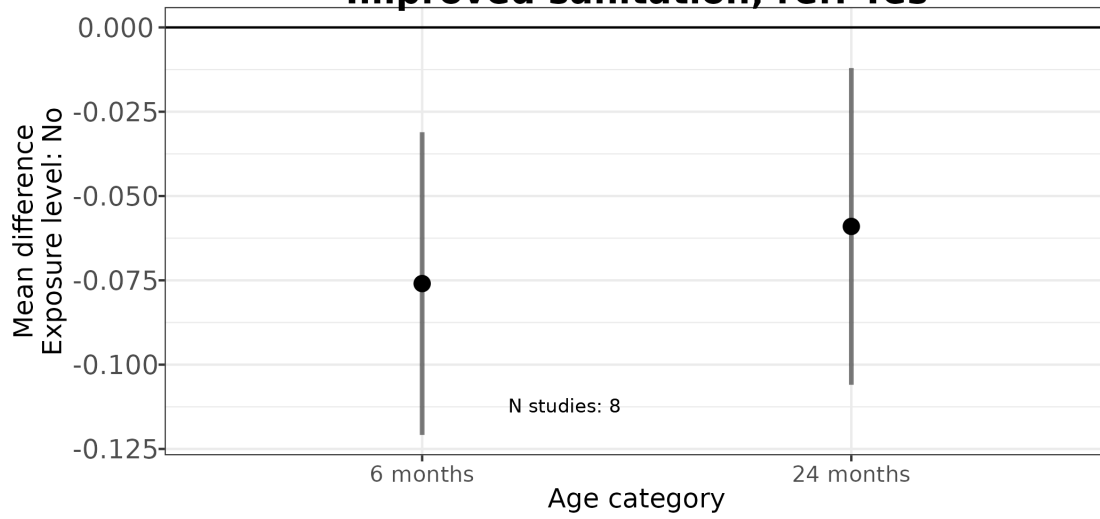

**Outcome: WHZ**  
**Exposure:**  
**Mother's age, ref: [20-30)**

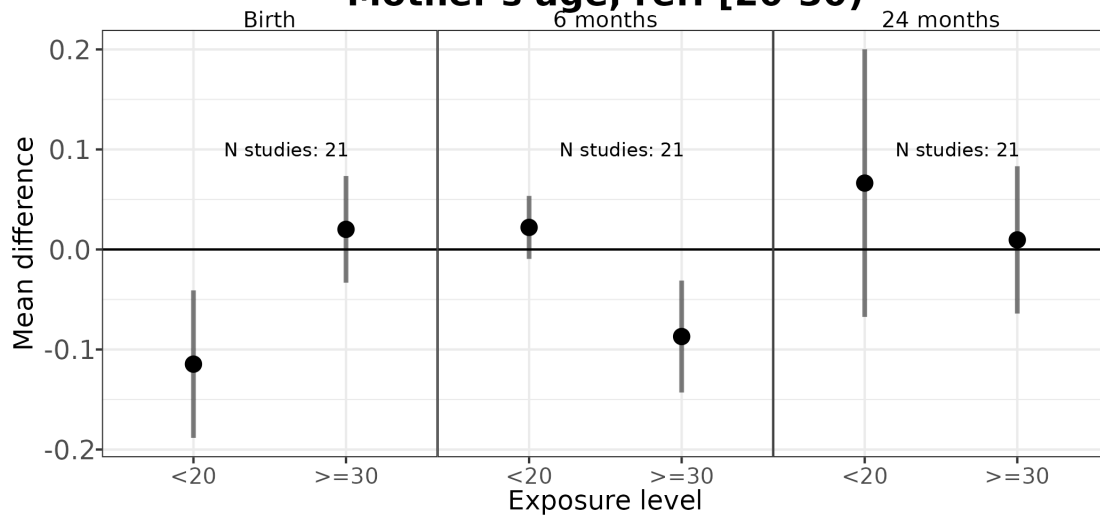

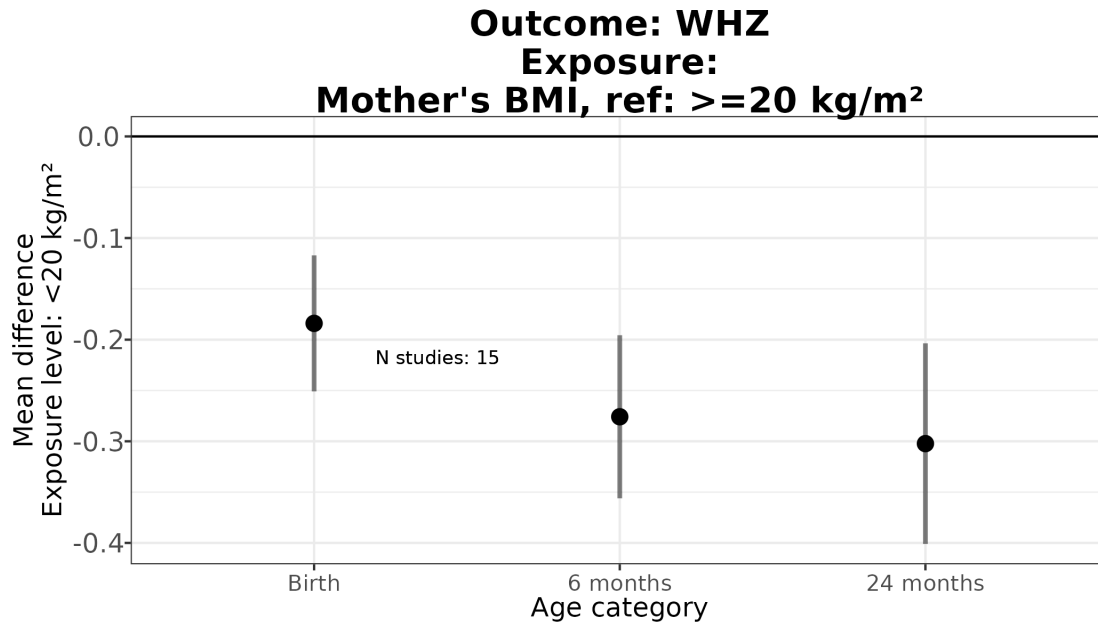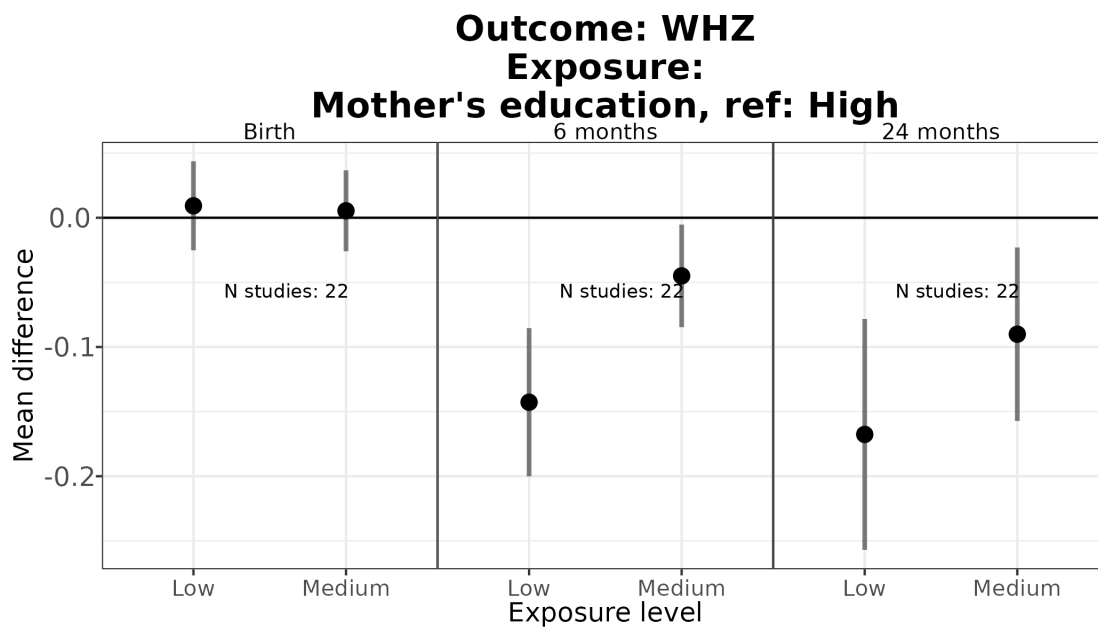

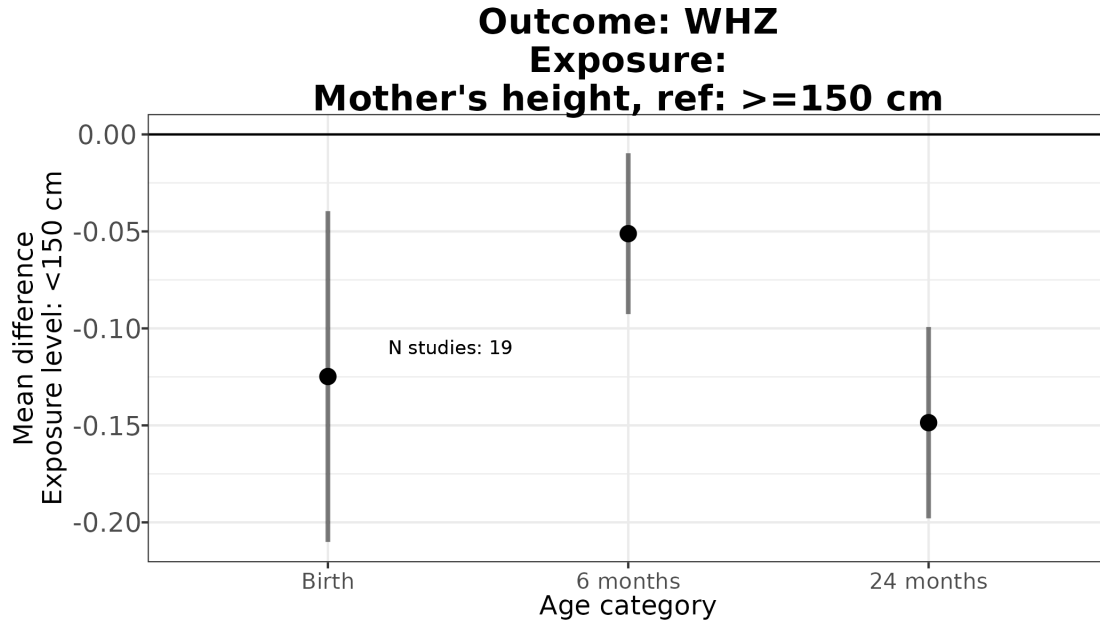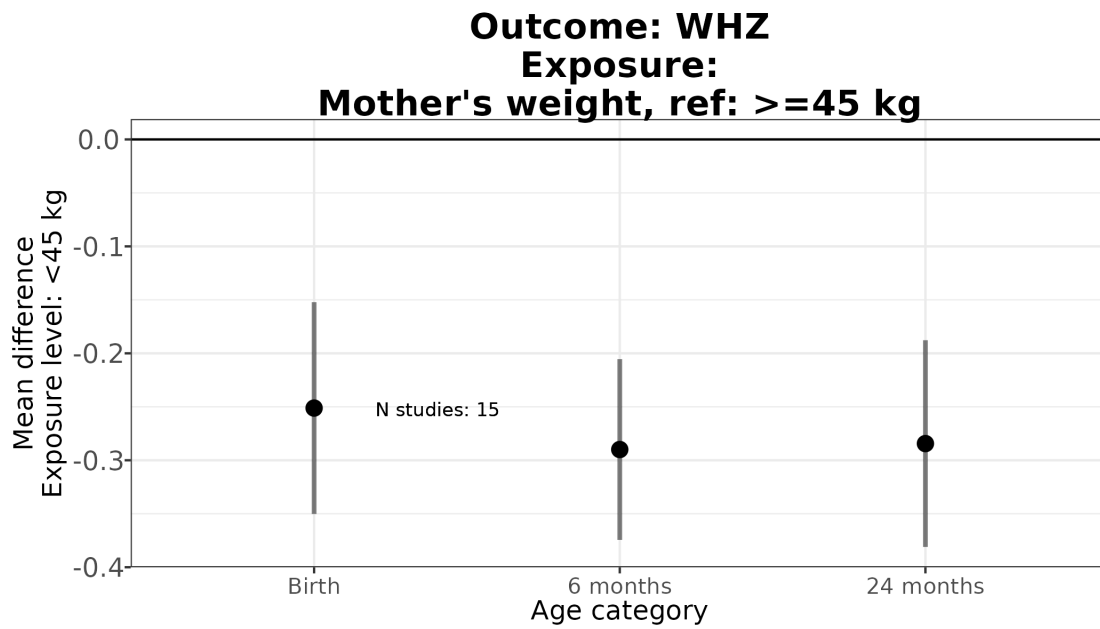

**Outcome: WHZ**  
**Exposure:**  
**# of children <5 in HH, ref: 1**

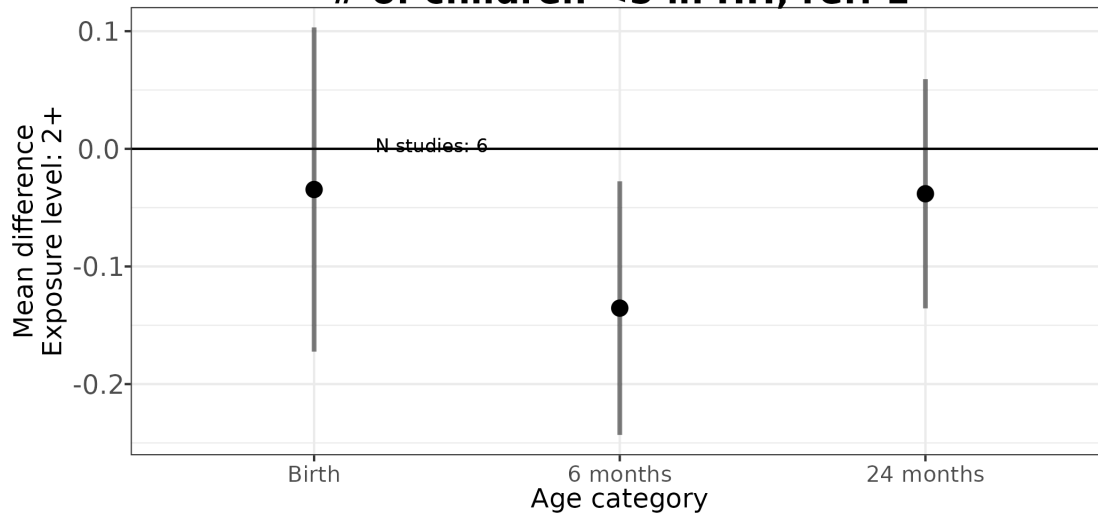

**Outcome: WHZ**  
**Exposure:**  
**# of people in HH, ref: 3 or less**

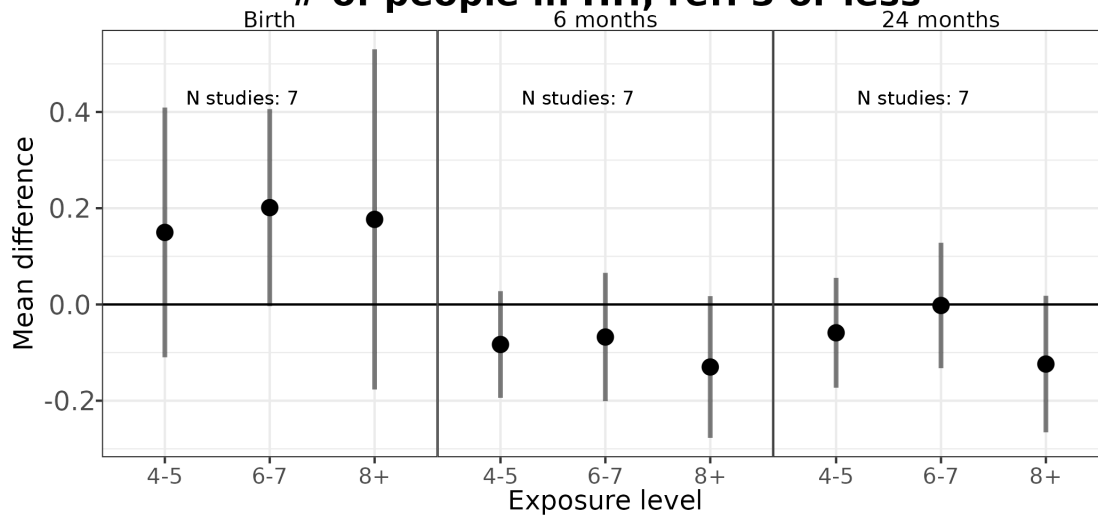

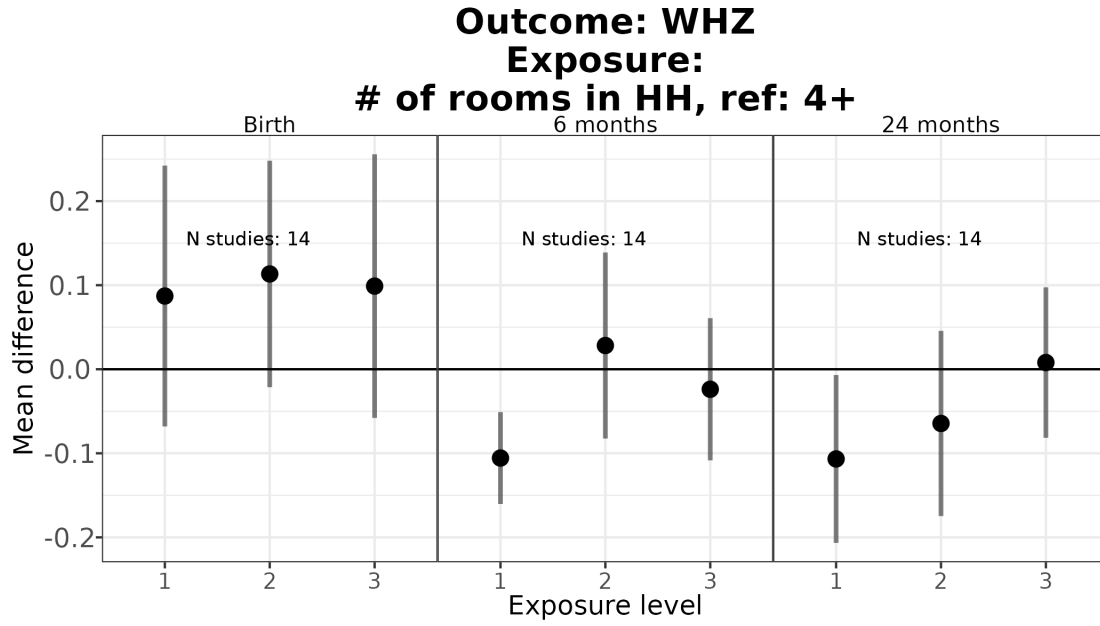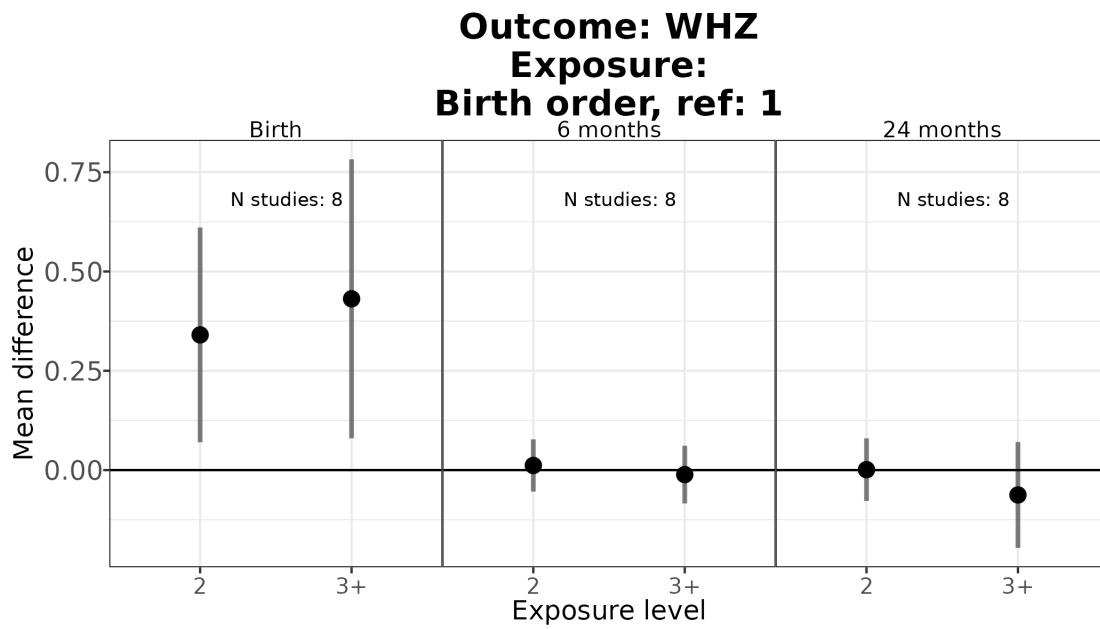

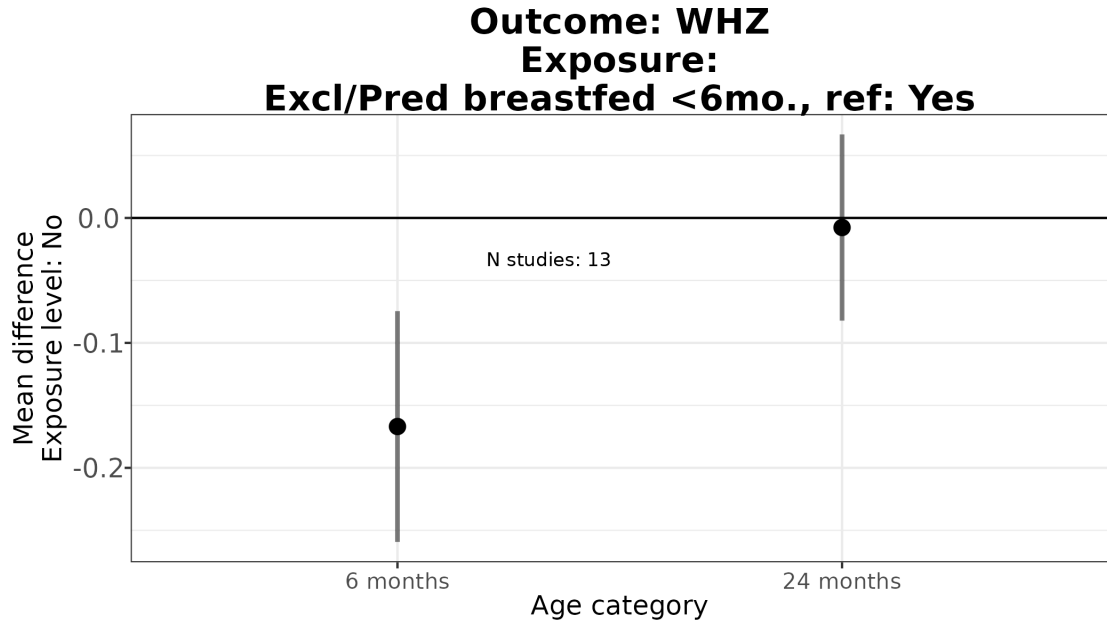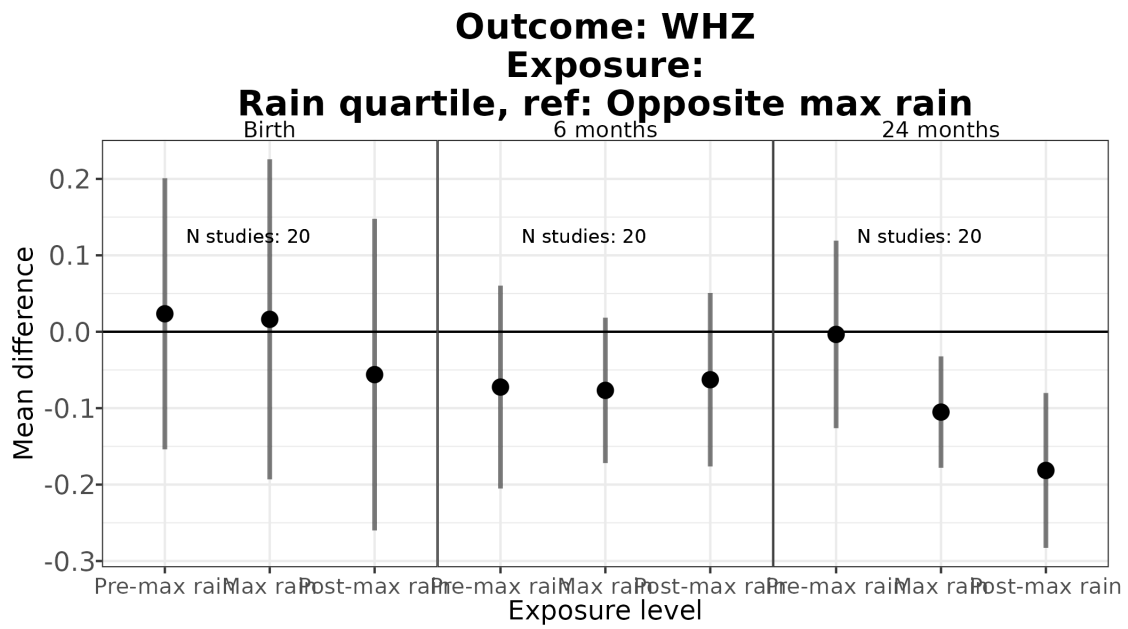



**Outcome: WHZ**  
**Exposure:**  
**Sex, ref: Female**

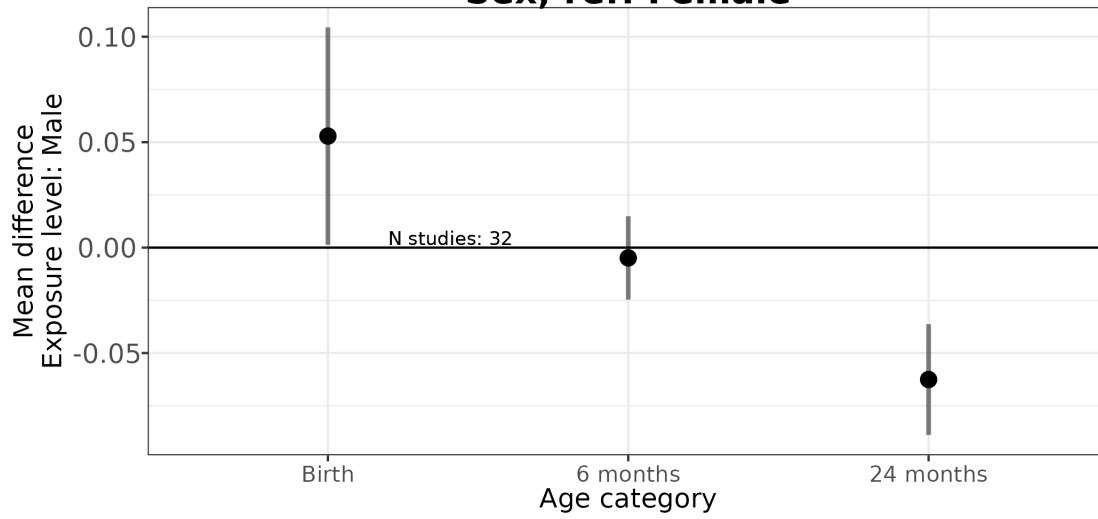

**Outcome: WHZ**  
**Exposure:**  
**Small-for-gestational age, ref: Not SGA**

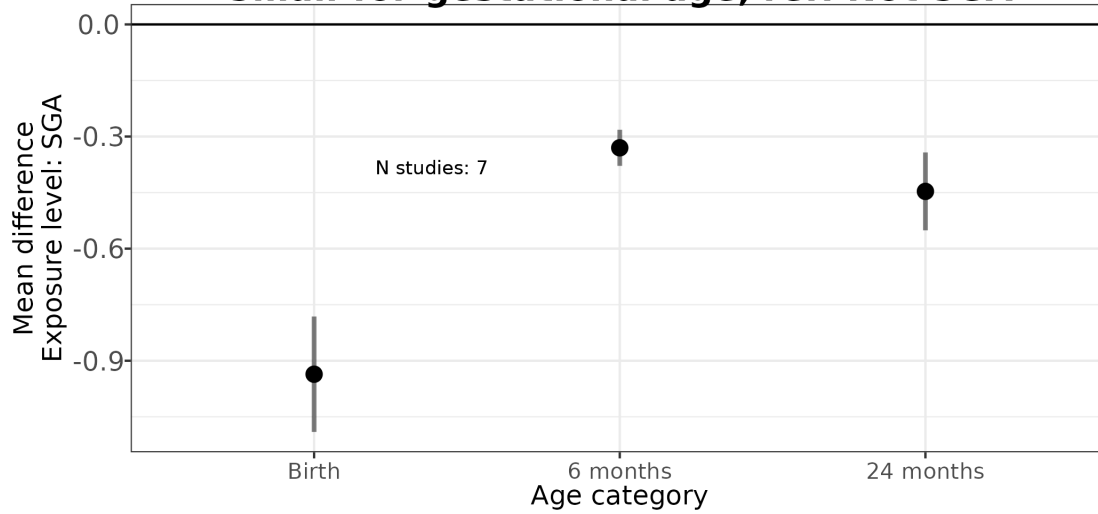

**Outcome: WHZ**  
**Exposure:**  
**Single parent, ref: 0**

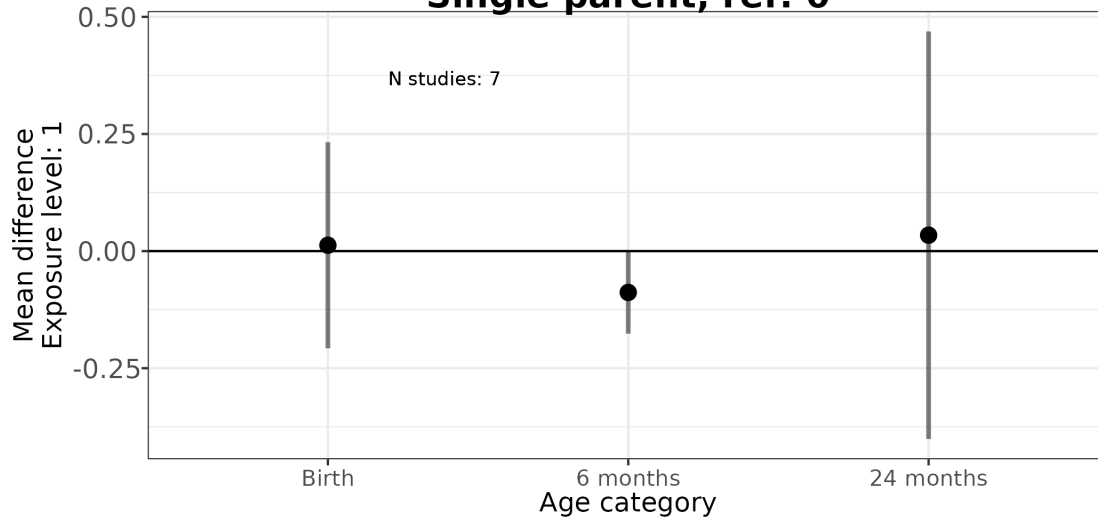

**Outcome: Stunted**  
**Exposure:**  
**Birth length (cm), ref:  $\geq 50$  cm**

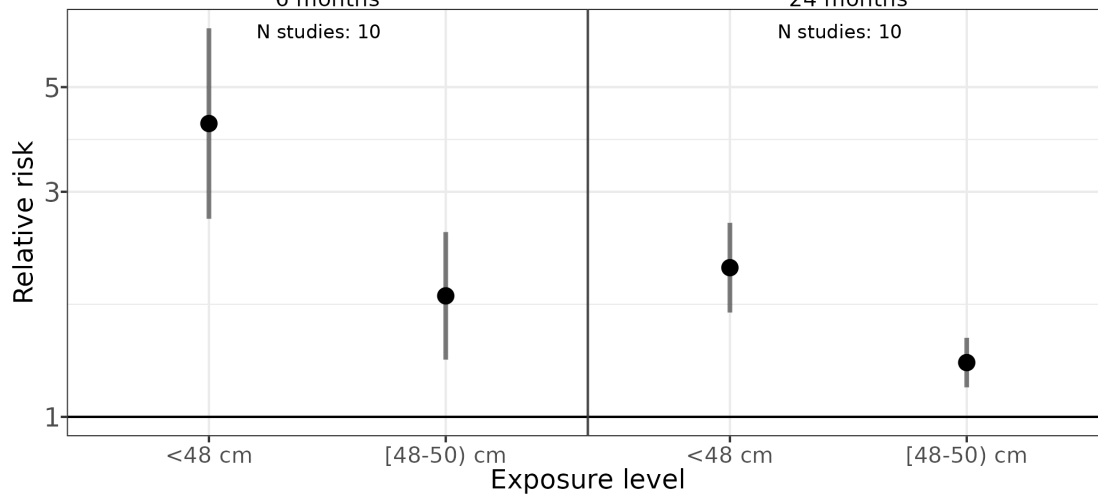

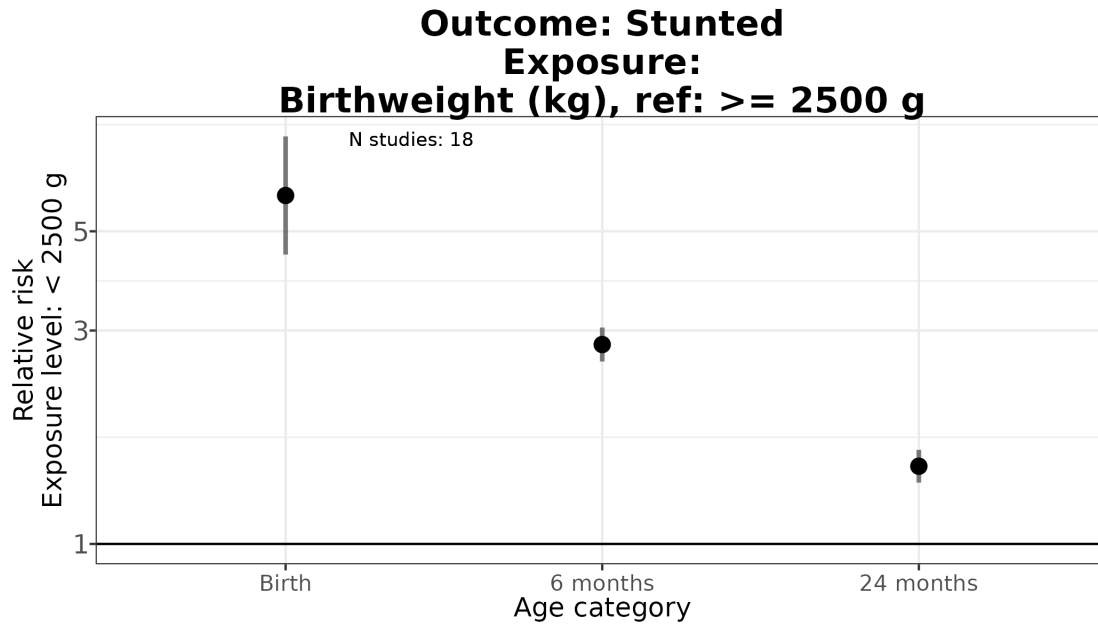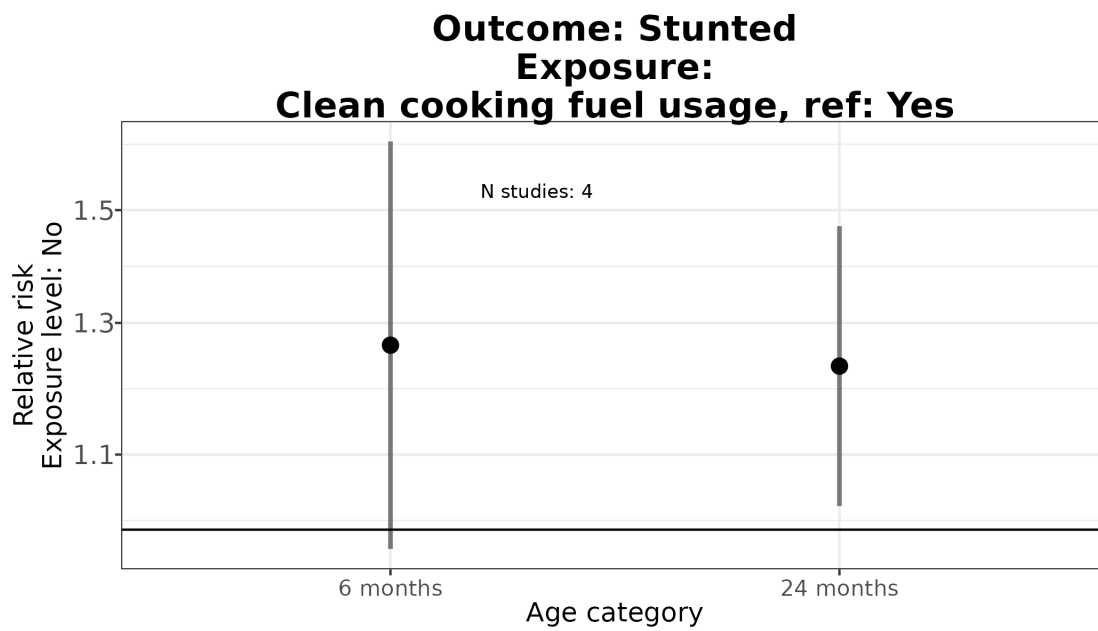

**Outcome: Stunted**  
**Exposure:**  
**Breastfed hour after birth, ref: Yes**

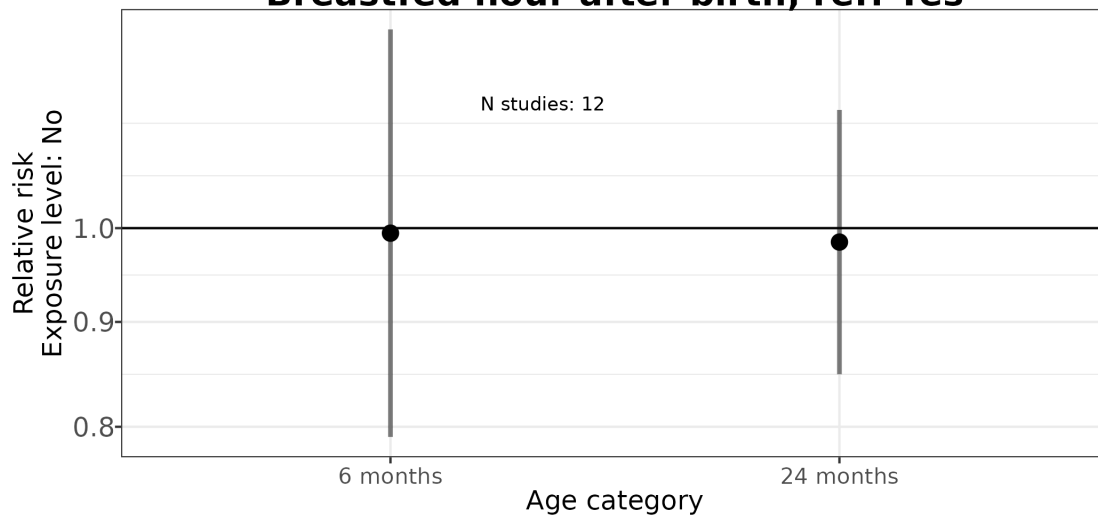

**Outcome: Stunted**  
**Exposure:**  
**Father's age, ref:  $\geq 35$**

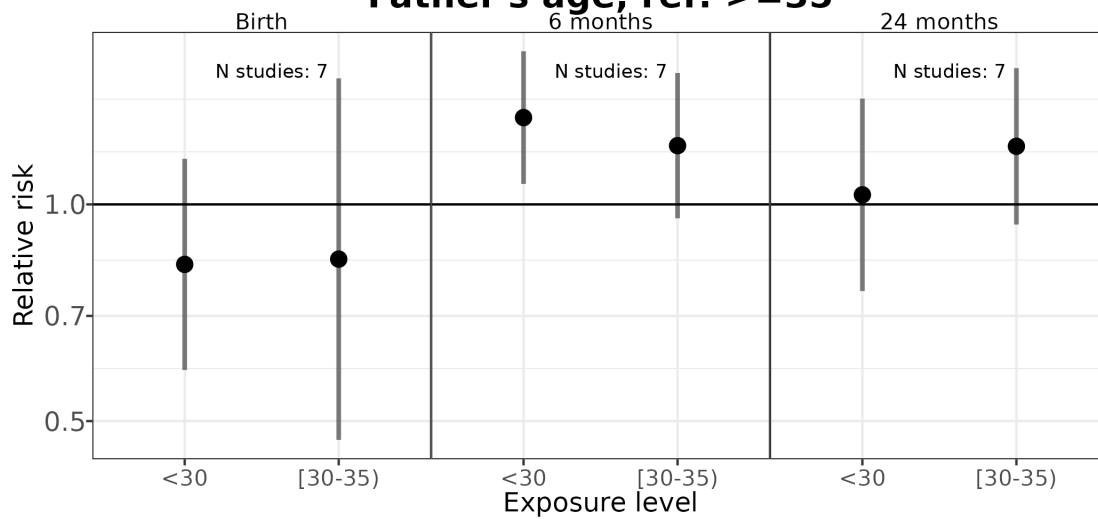

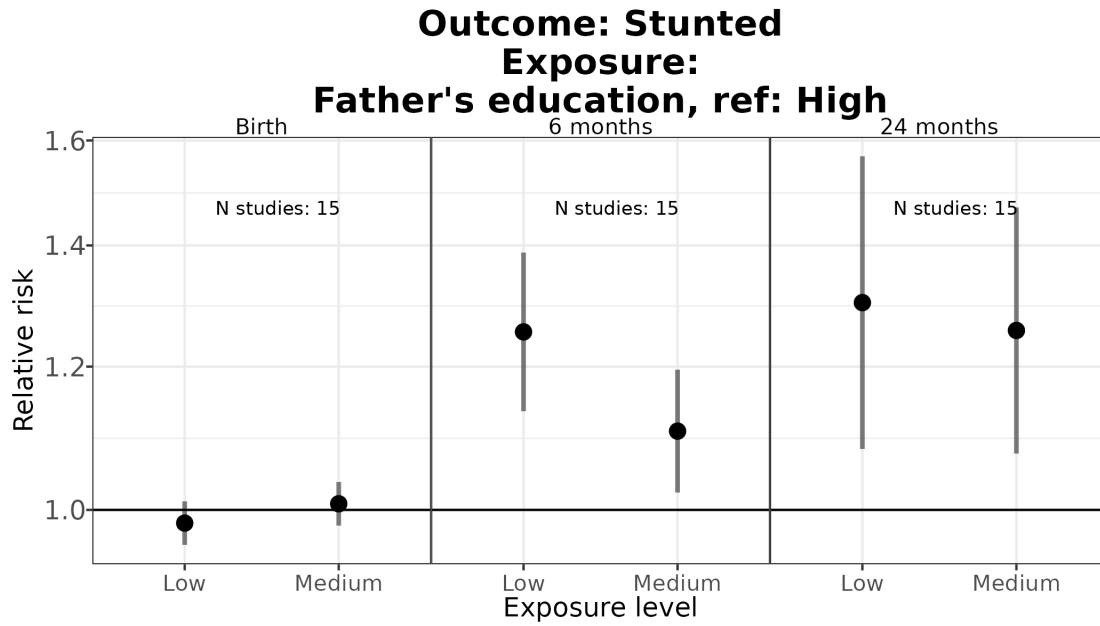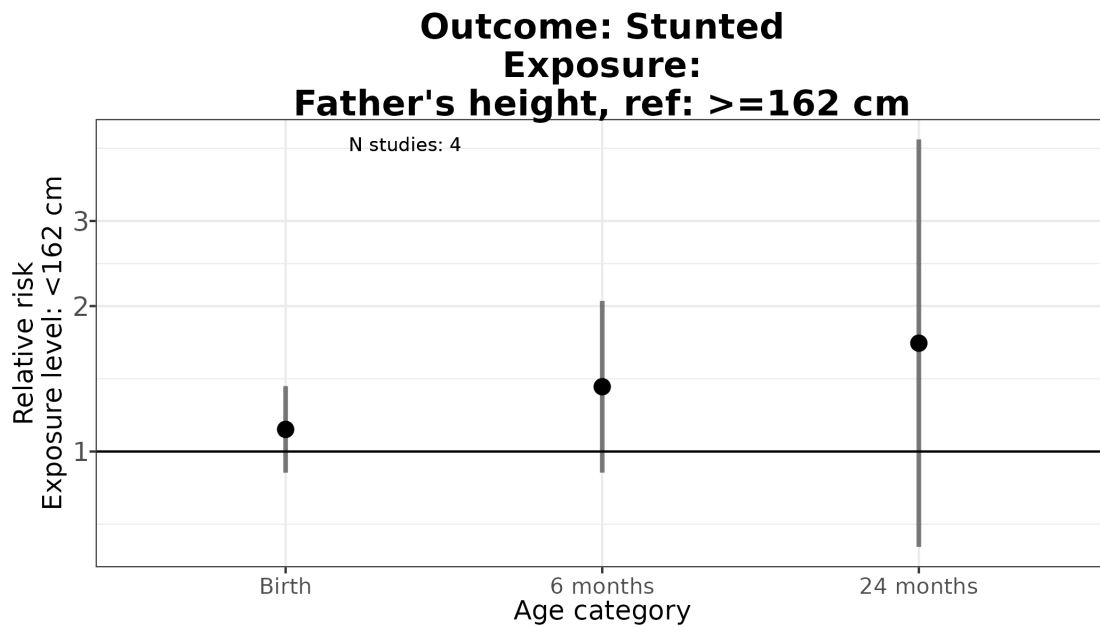

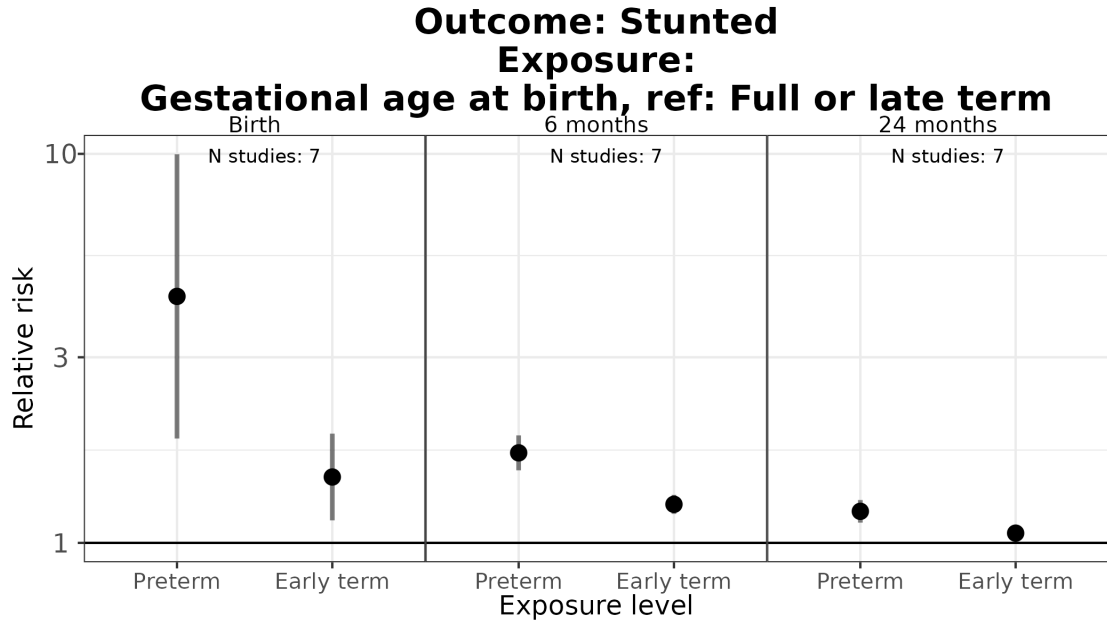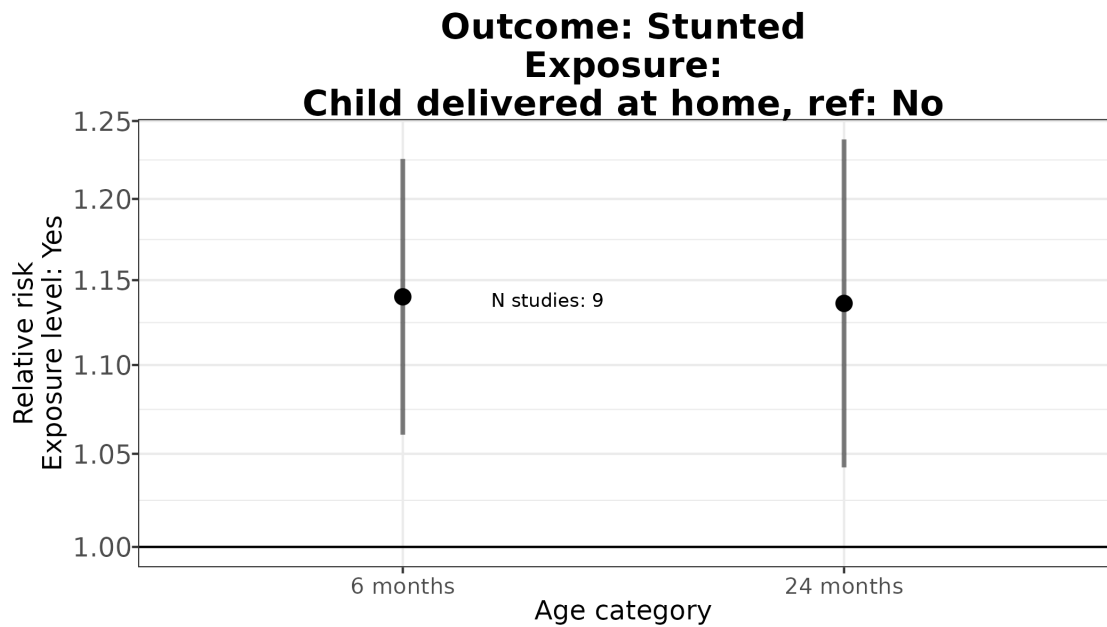

**Outcome: Stunted**  
**Exposure:**  
**HH food security, ref: Food Secure**

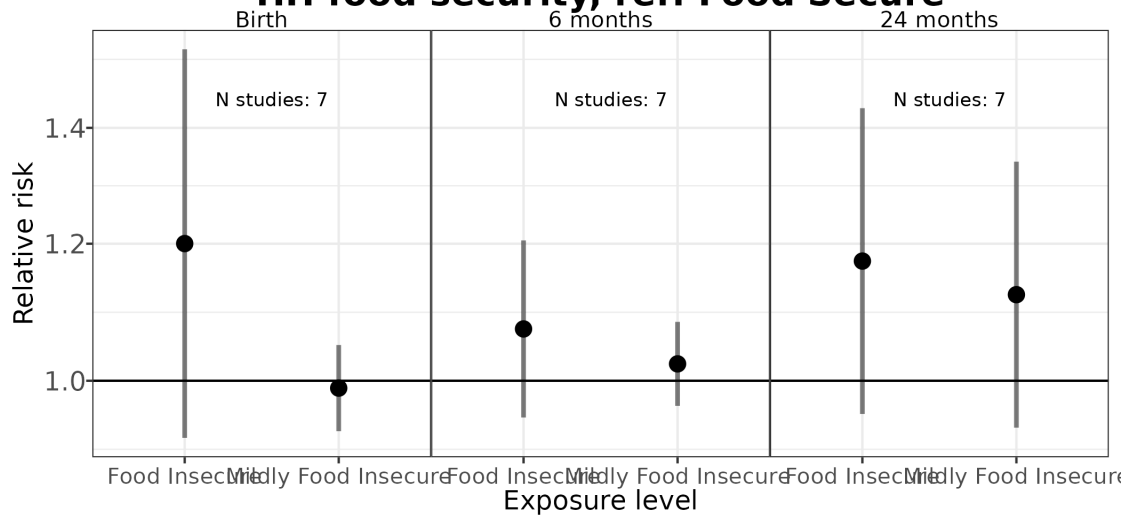

**Outcome: Stunted**  
**Exposure:**  
**HH wealth, ref: Q4**

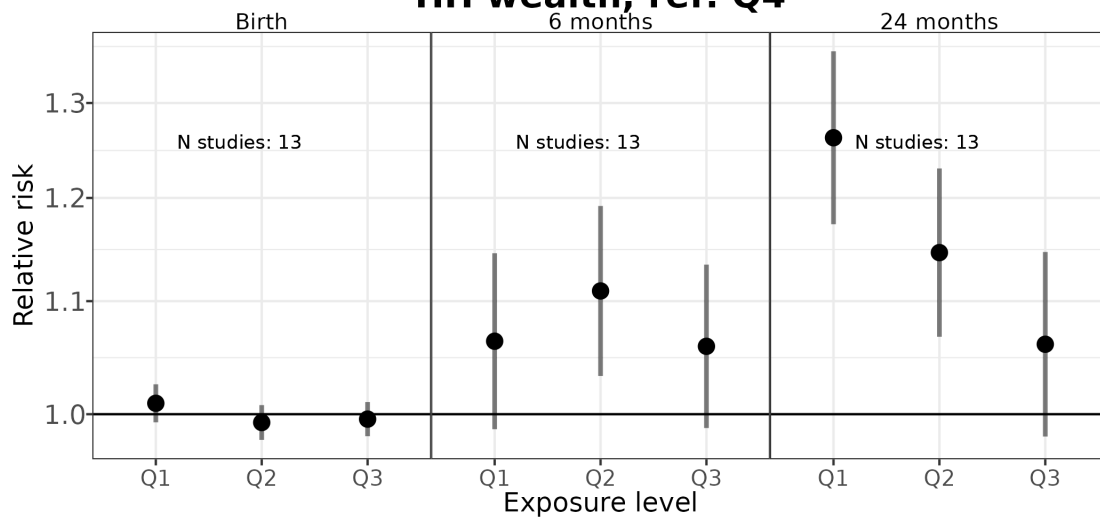

**Outcome: Stunted**  
**Exposure:**  
**Improved floor, ref: Yes**

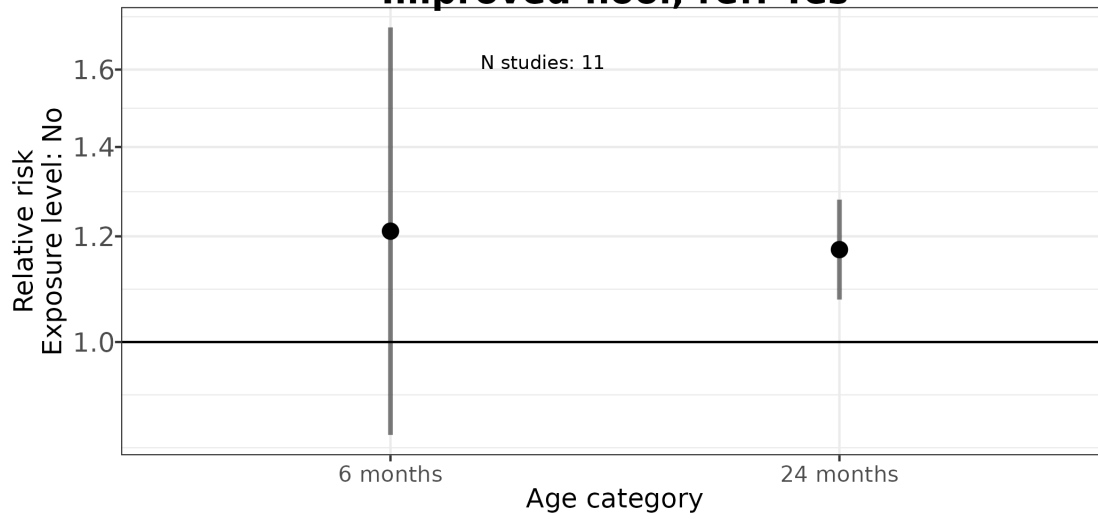

**Outcome: Stunted**  
**Exposure:**  
**Improved sanitation, ref: Yes**

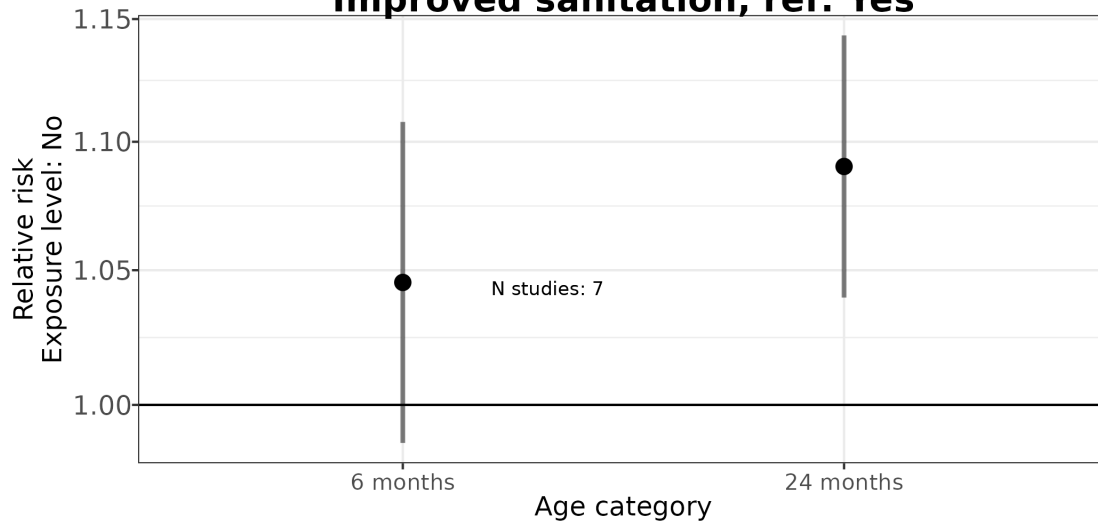



**Outcome: Stunted**  
**Exposure:**  
**Mother's age, ref: [20-30)**

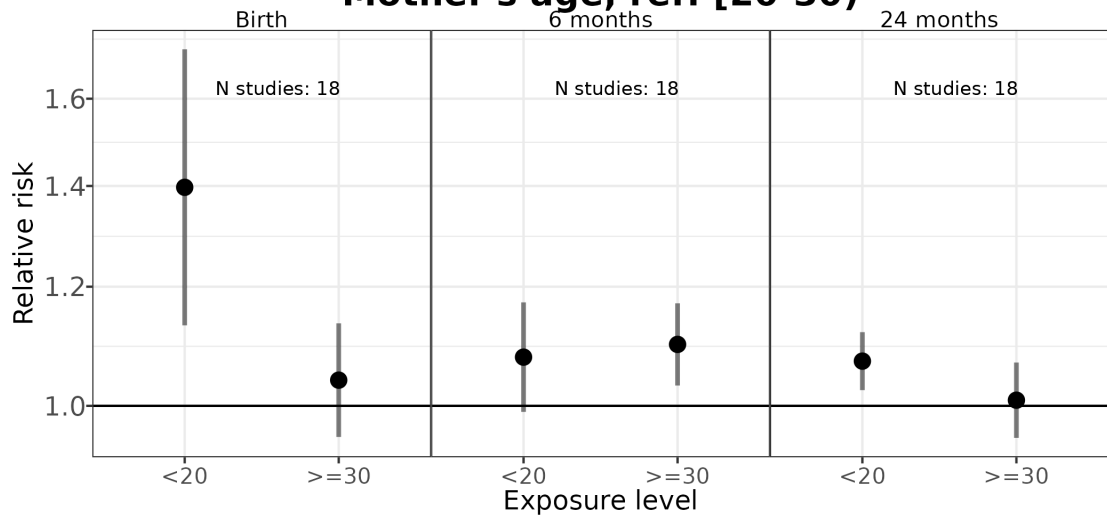

**Outcome: Stunted**  
**Exposure:**  
**Mother's BMI, ref: >=20 kg/m<sup>2</sup>**

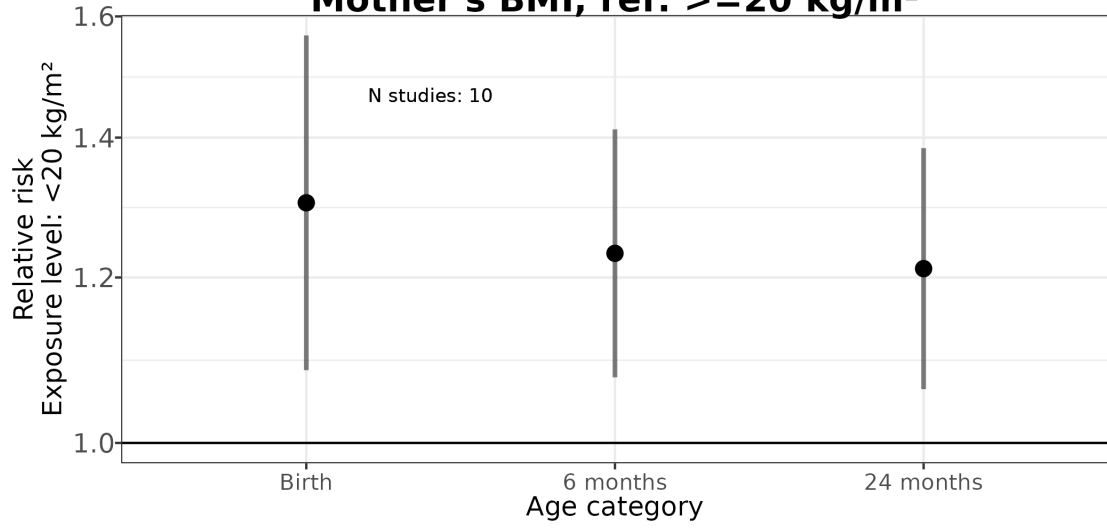

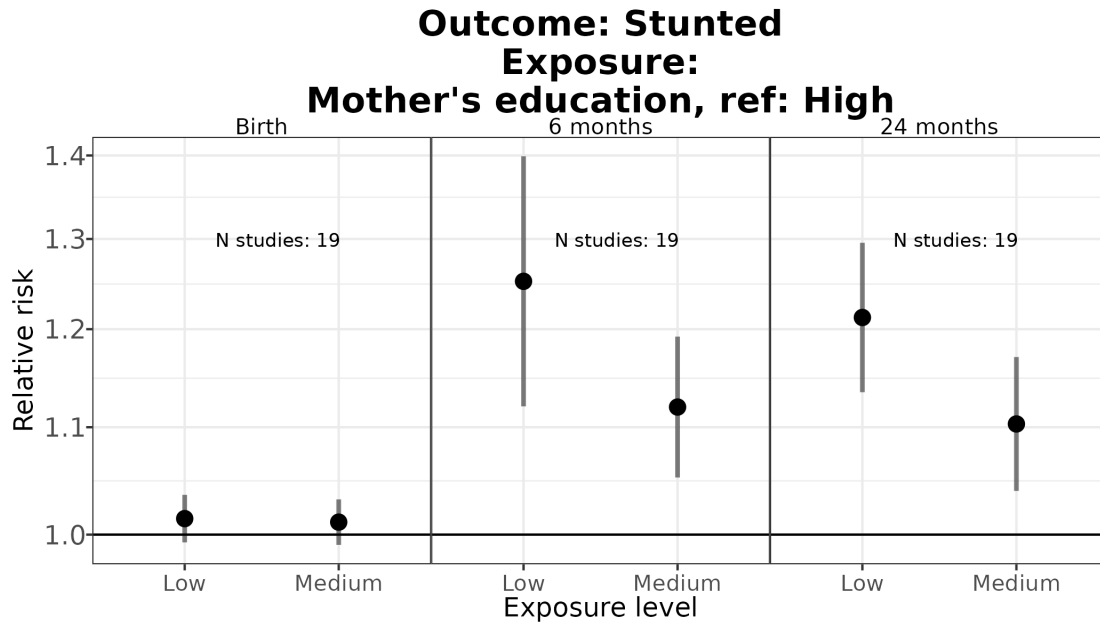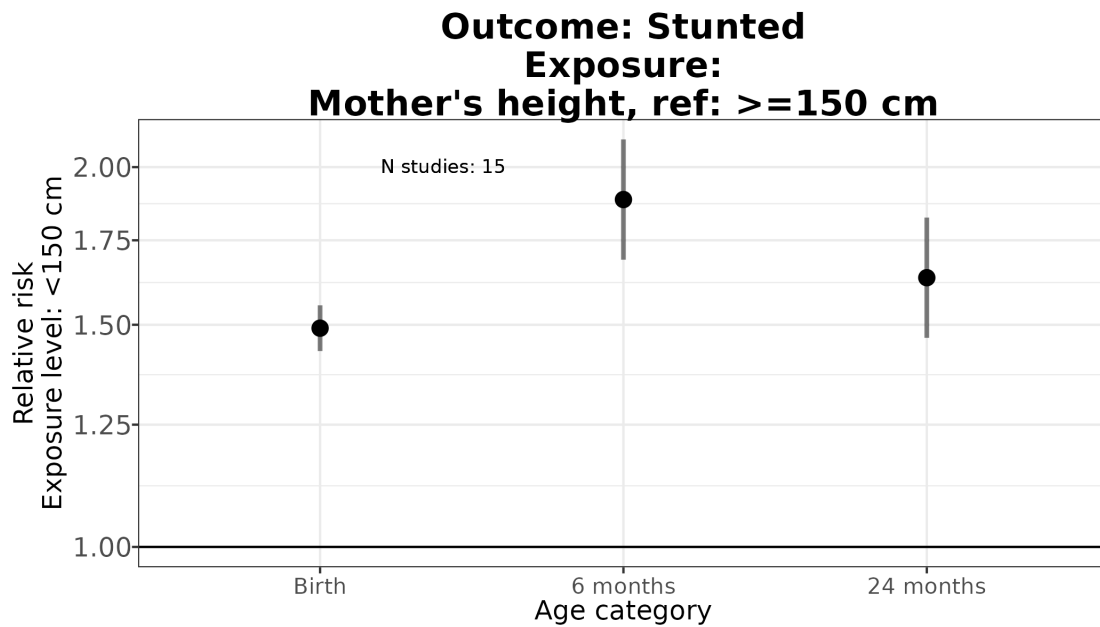

**Outcome: Stunted**  
**Exposure:**  
**Mother's weight, ref:  $\geq 45$  kg**

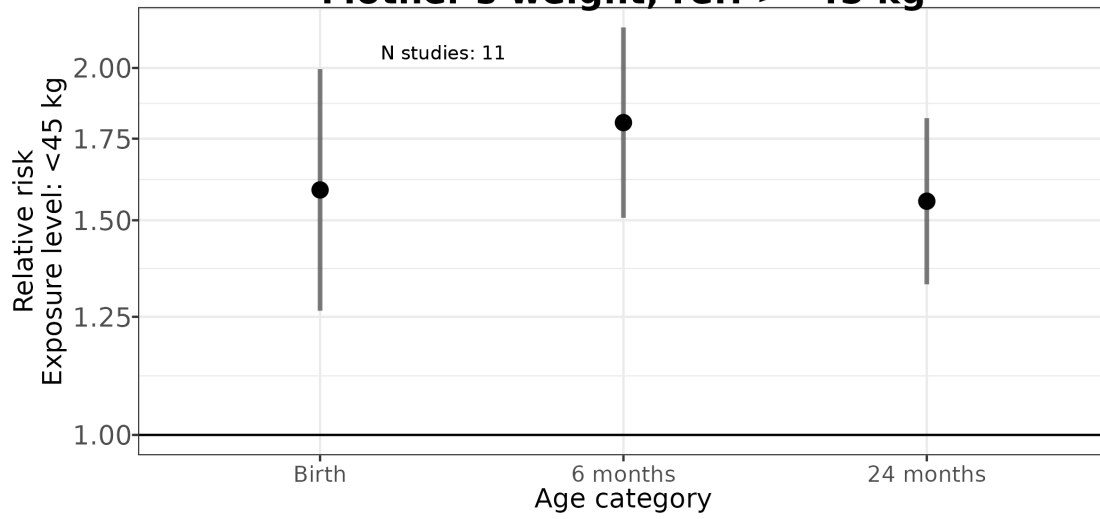

**Outcome: Stunted**  
**Exposure:**  
**# of children <5 in HH, ref: 1**

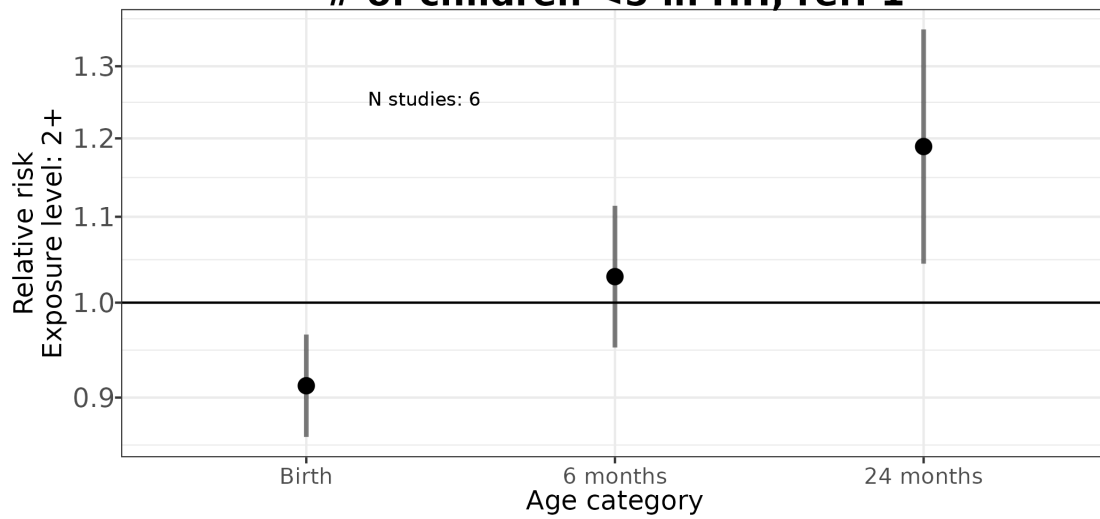

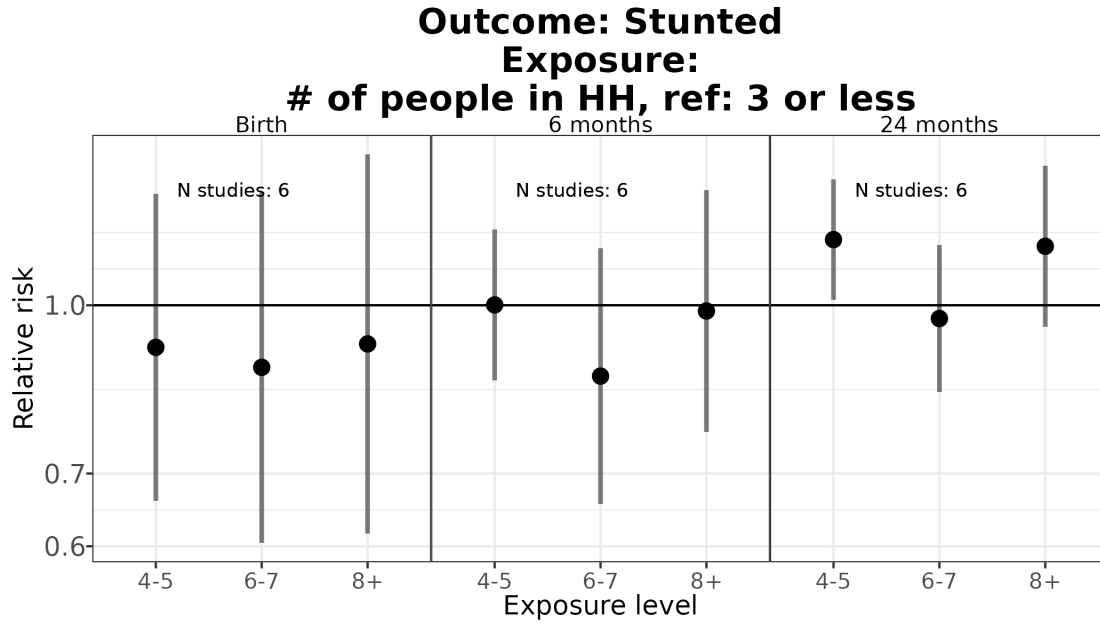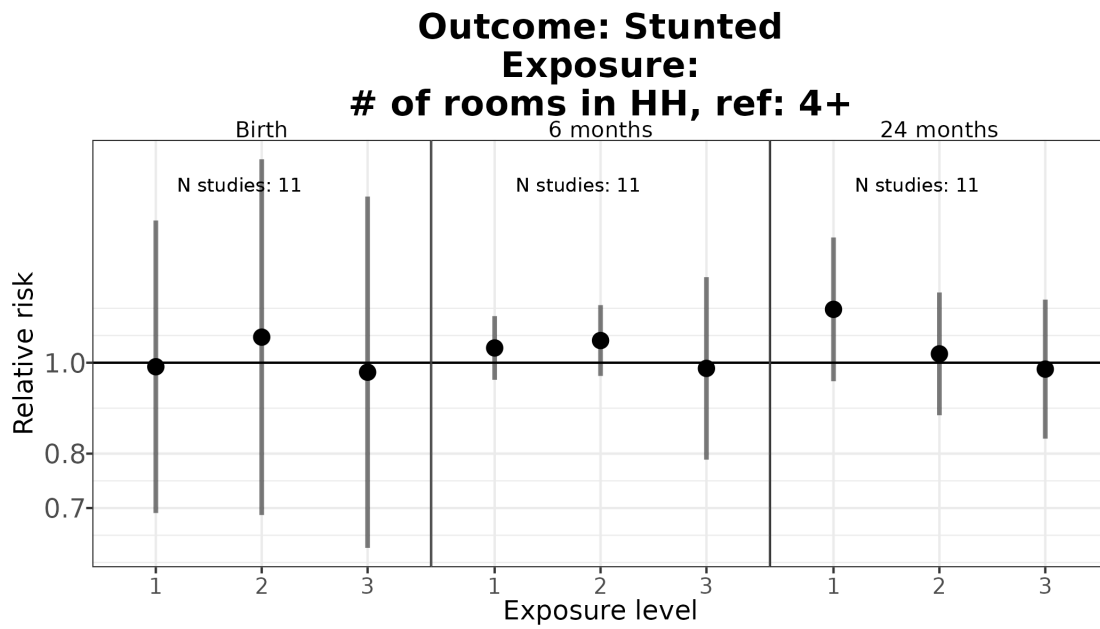

**Outcome: Stunted**  
**Exposure:**  
**Birth order, ref: 1**

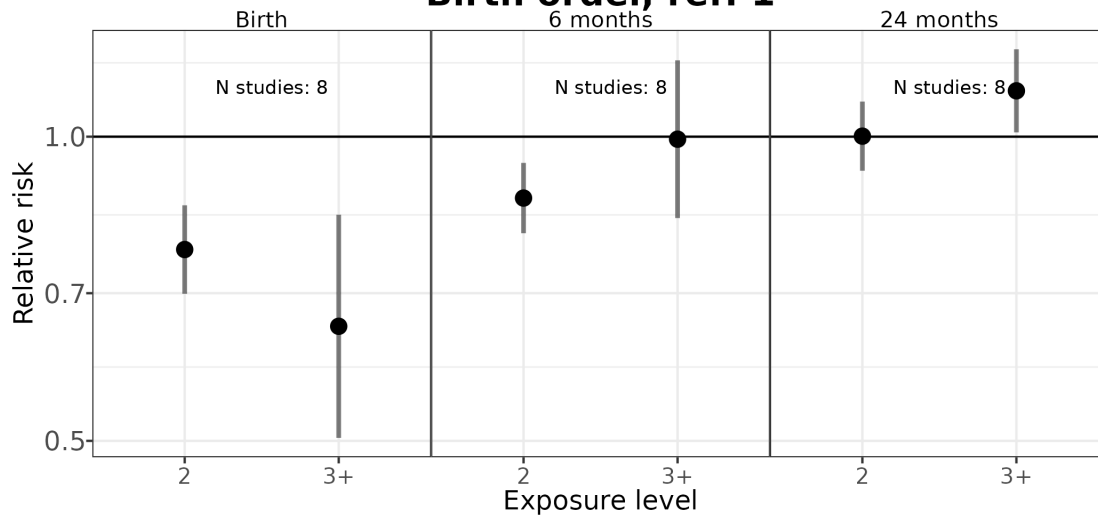

**Outcome: Stunted**  
**Exposure:**  
**Diarrhea <6 mo. (% days), ref: [0%, 2%]**

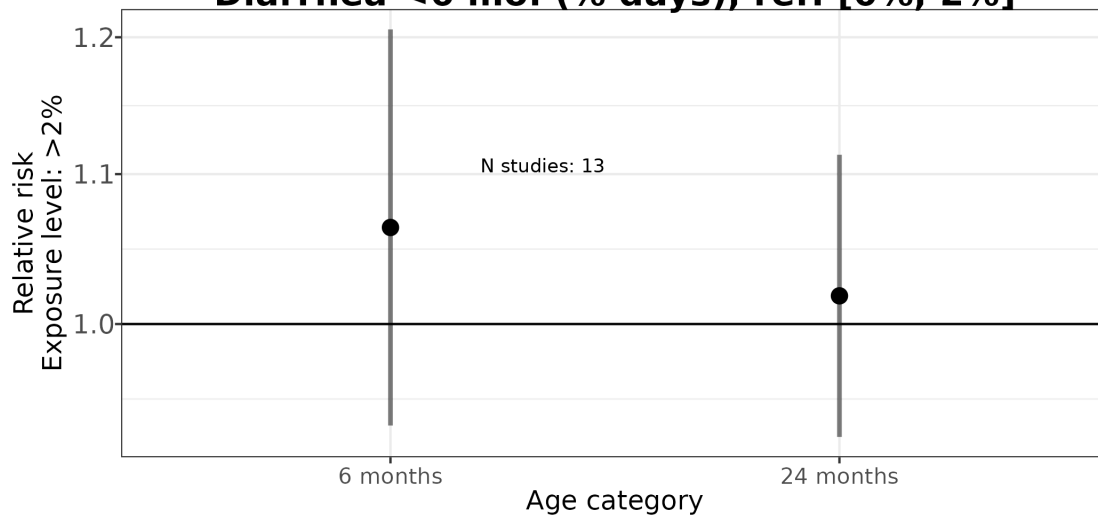

**Outcome: Stunted**  
**Exposure:**  
**Persistent wasting <6 mo., ref: No**

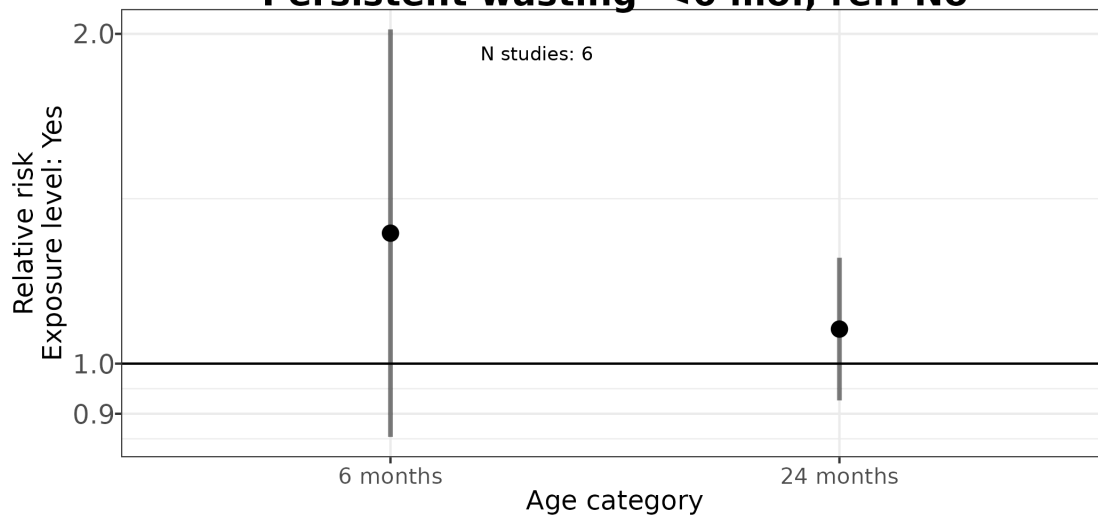

**Outcome: Stunted**  
**Exposure:**  
**Excl/Pred breastfed <6mo., ref: Yes**

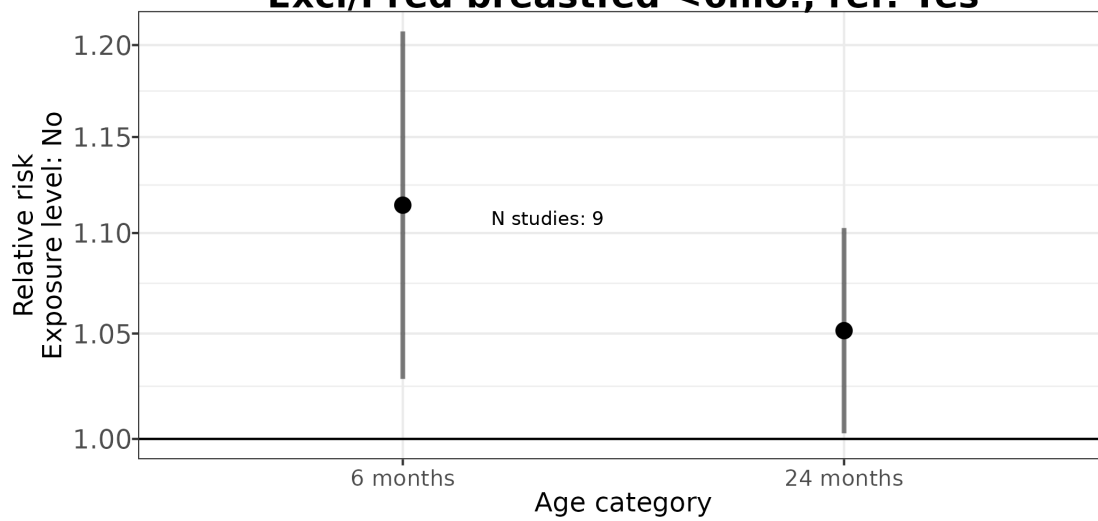

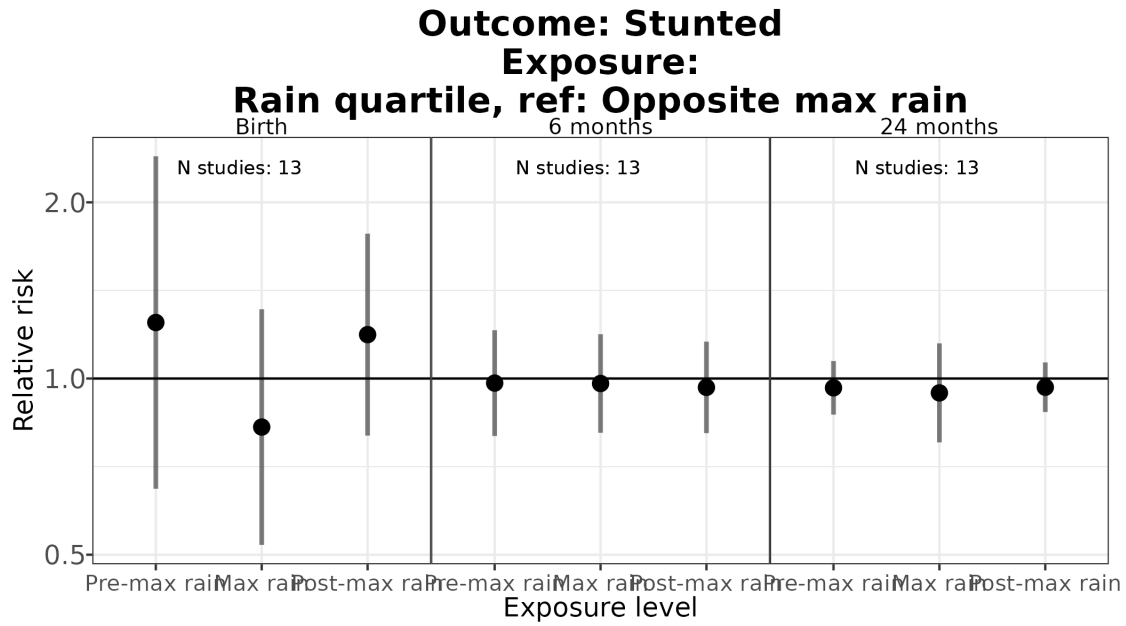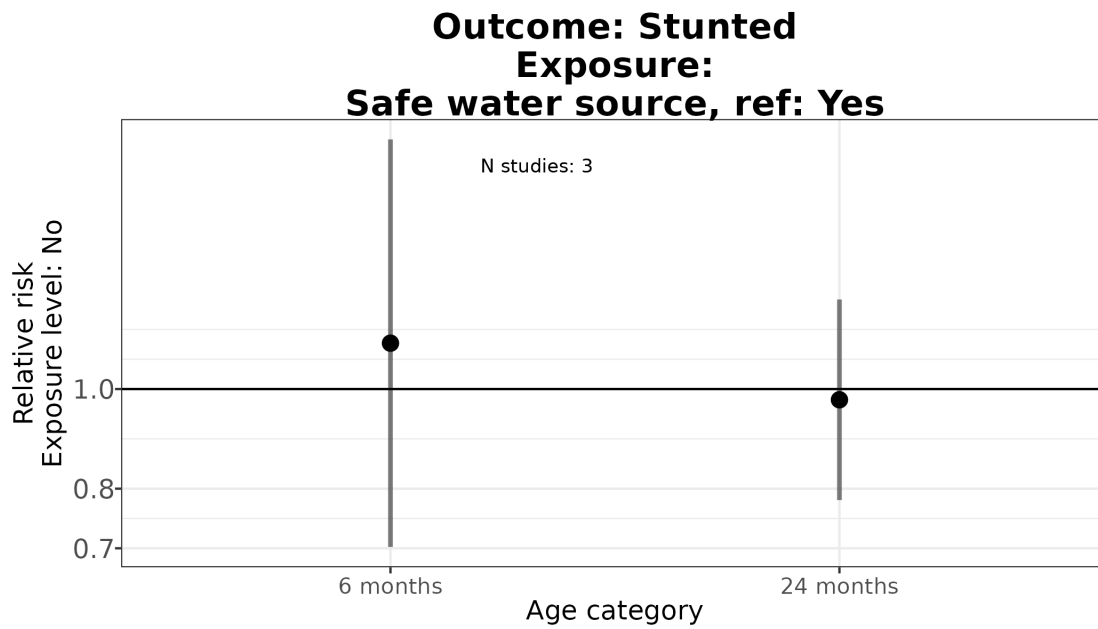

**Outcome: Stunted**  
**Exposure:**  
**Sex, ref: Female**

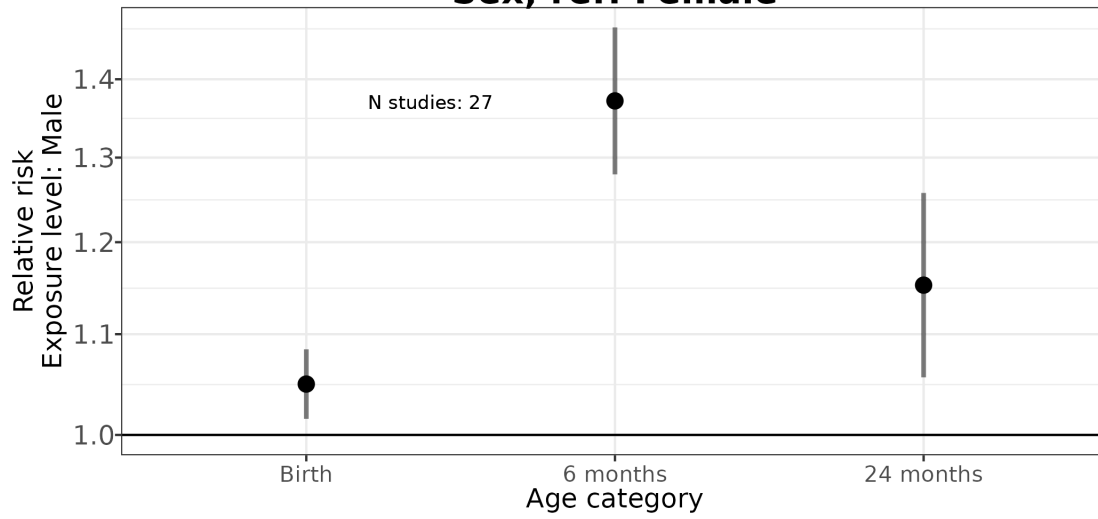

**Outcome: Stunted**  
**Exposure:**  
**Small-for-gestational age, ref: Not SGA**

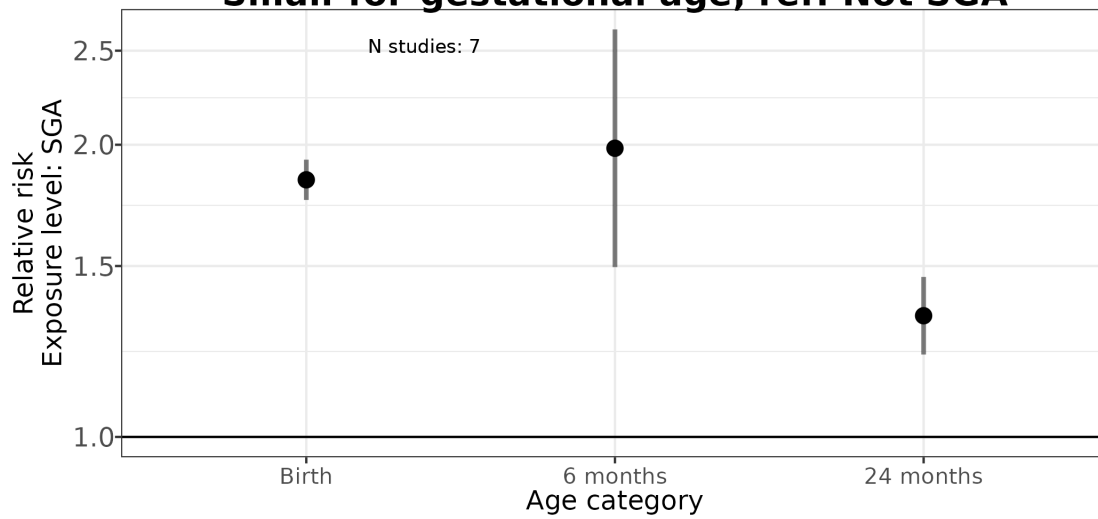



**Outcome: Stunted**  
**Exposure:**  
**Single parent, ref: 0**

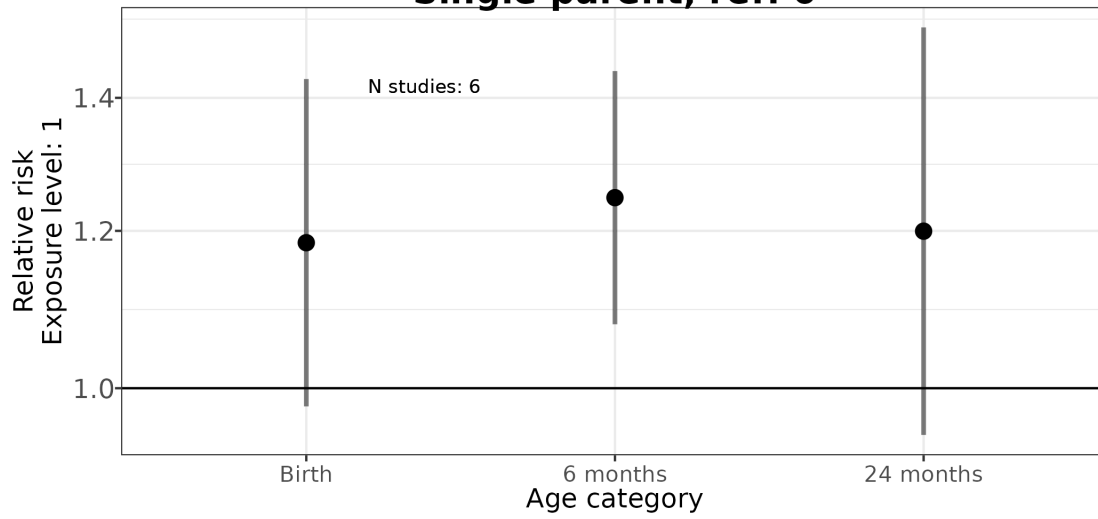

**Outcome: Ever Stunted**  
**Exposure:**  
**Birthweight (kg), ref:  $\geq 2500$  g**

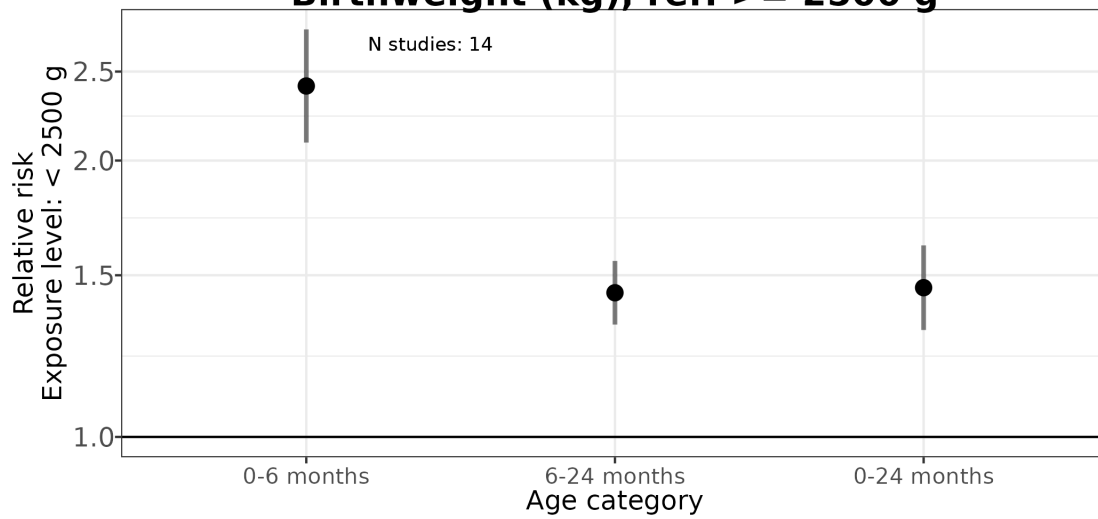

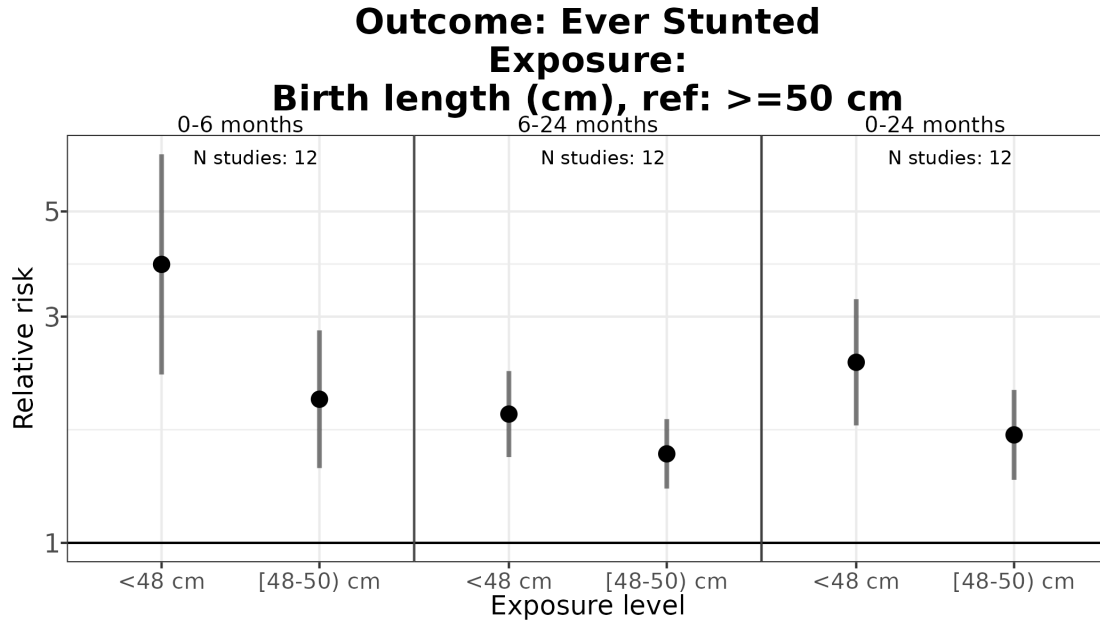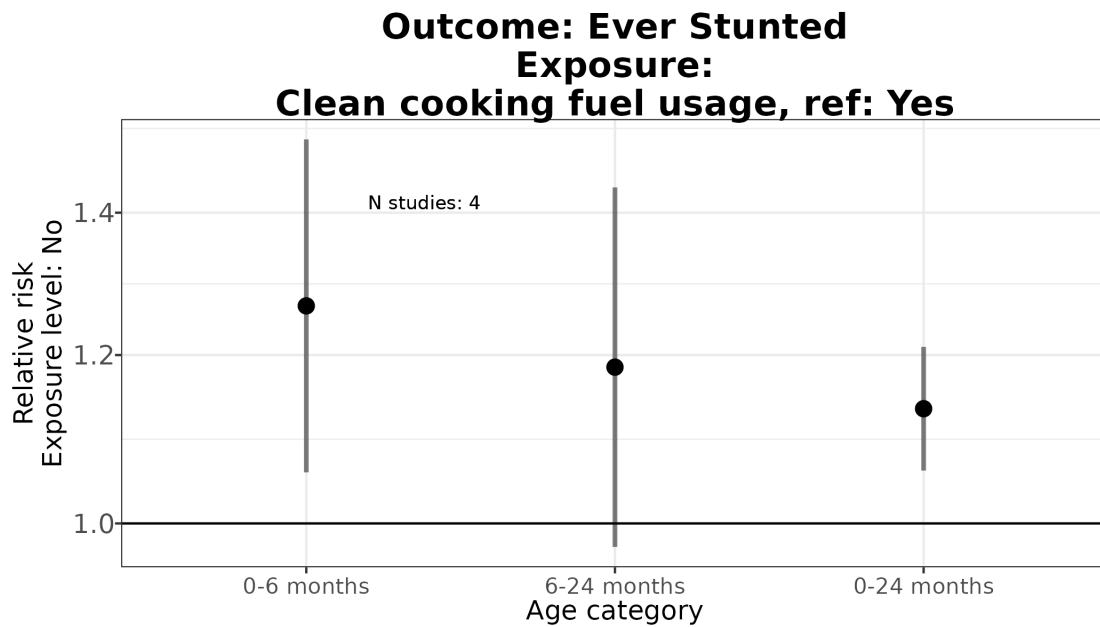

**Outcome: Ever Stunted**  
**Exposure:**  
**Breastfed hour after birth, ref: Yes**

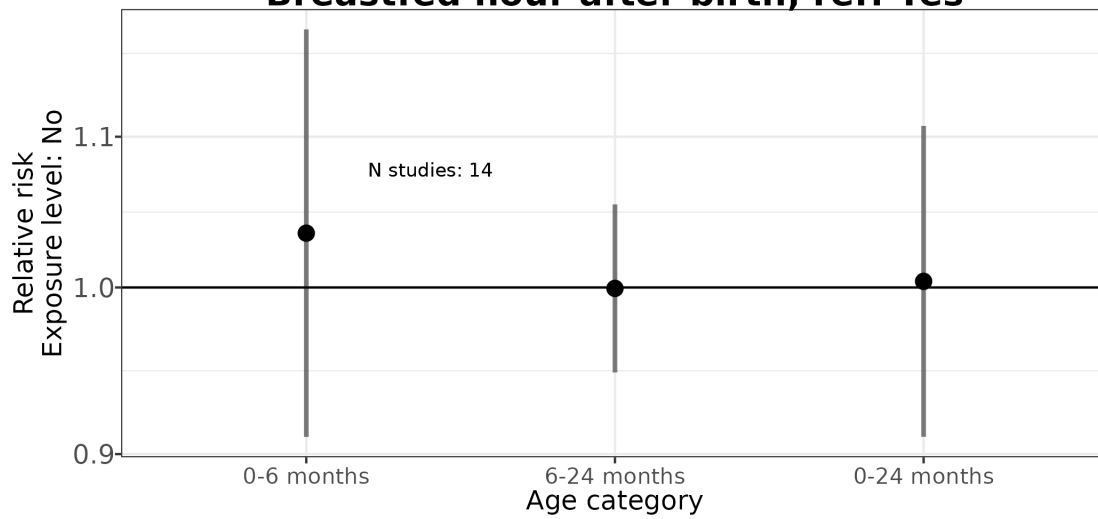

**Outcome: Ever Stunted**  
**Exposure:**  
**Father's age, ref: >=35**

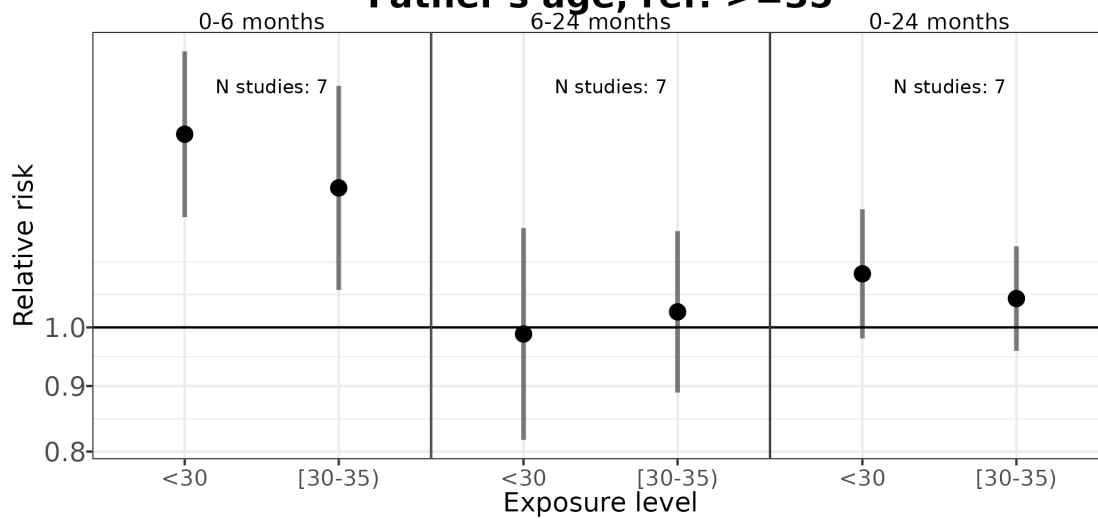

**Outcome: Ever Stunted**  
**Exposure:**  
**Father's education, ref: High**

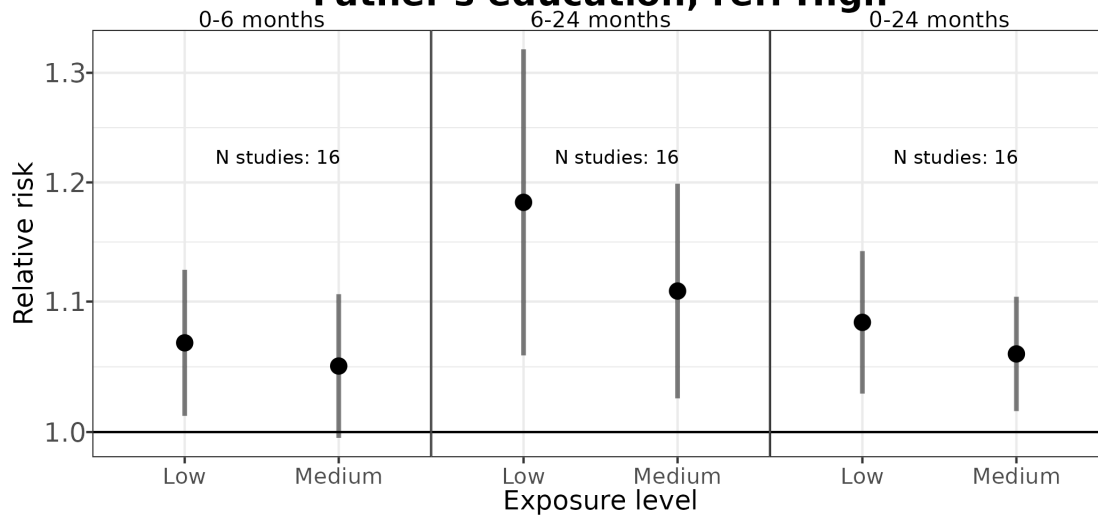

**Outcome: Ever Stunted**  
**Exposure:**  
**Father's height, ref:  $\geq 162$  cm**

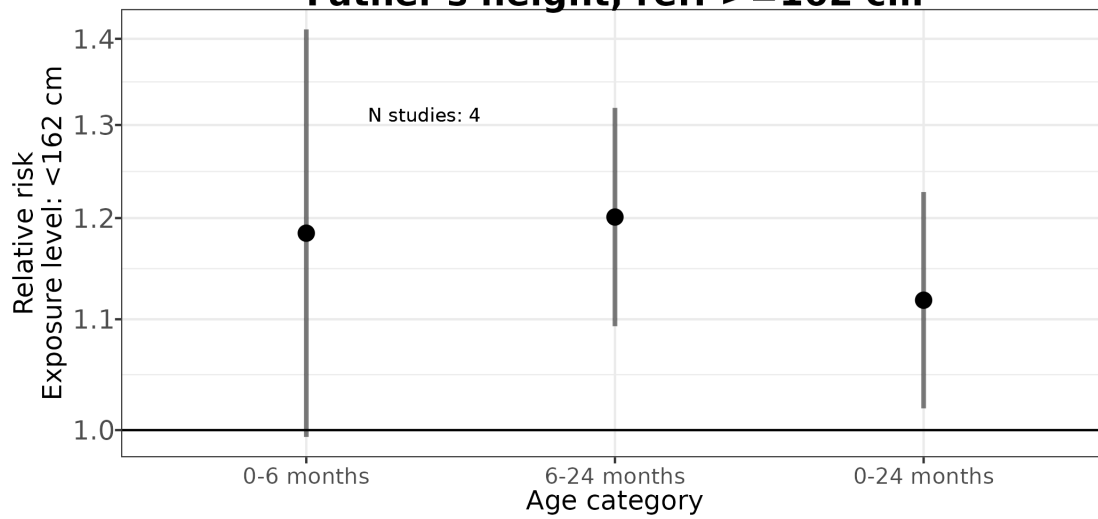

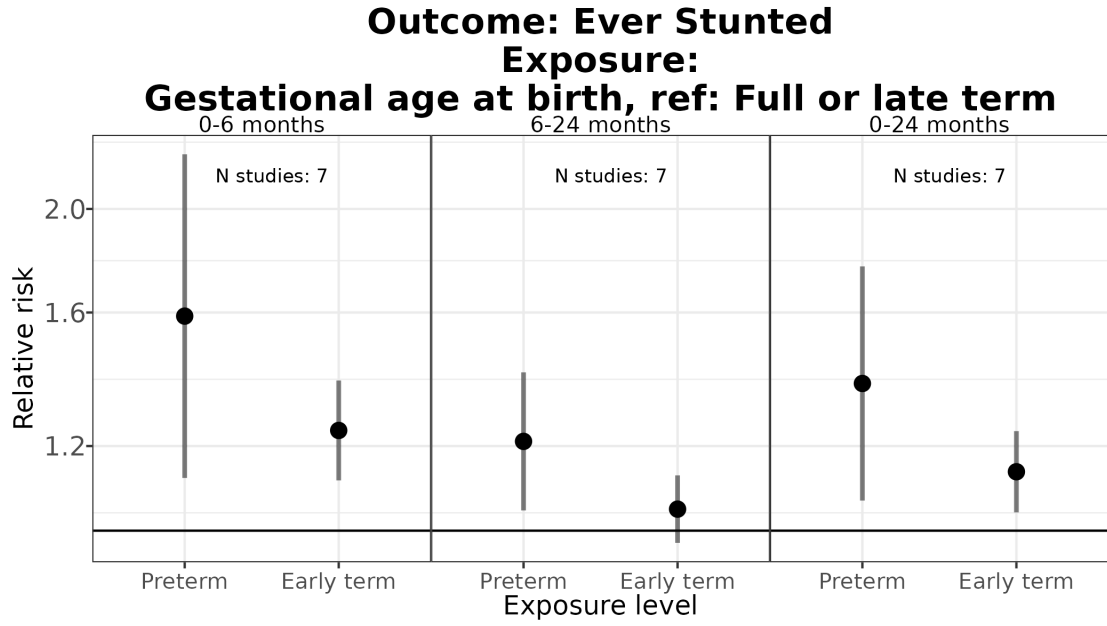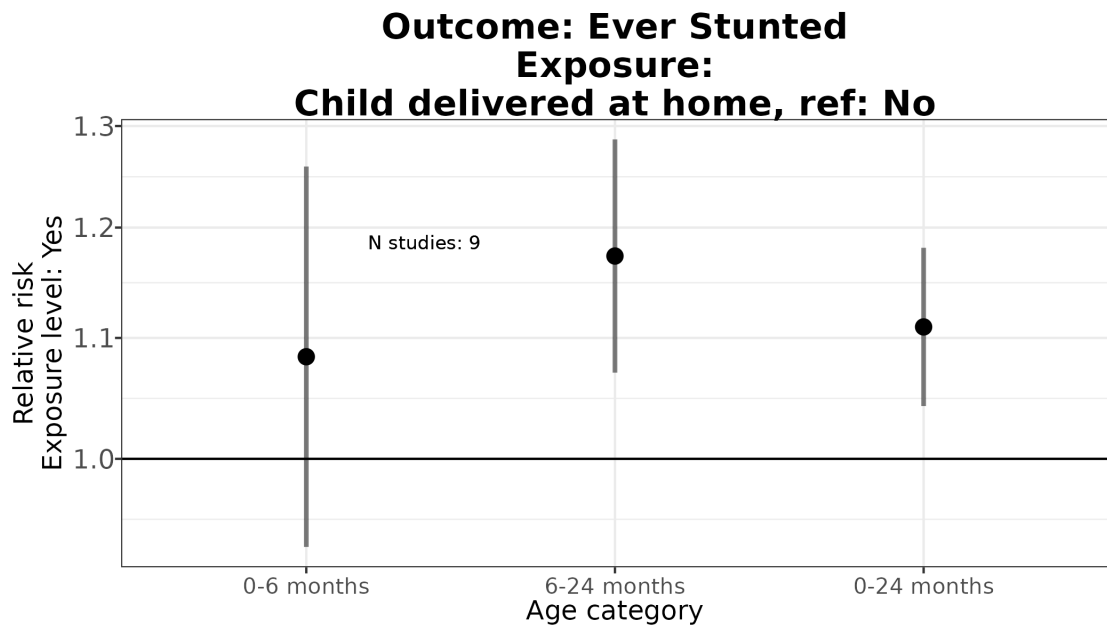

**Outcome: Ever Stunted**  
**Exposure:**  
**HH food security, ref: Food Secure**

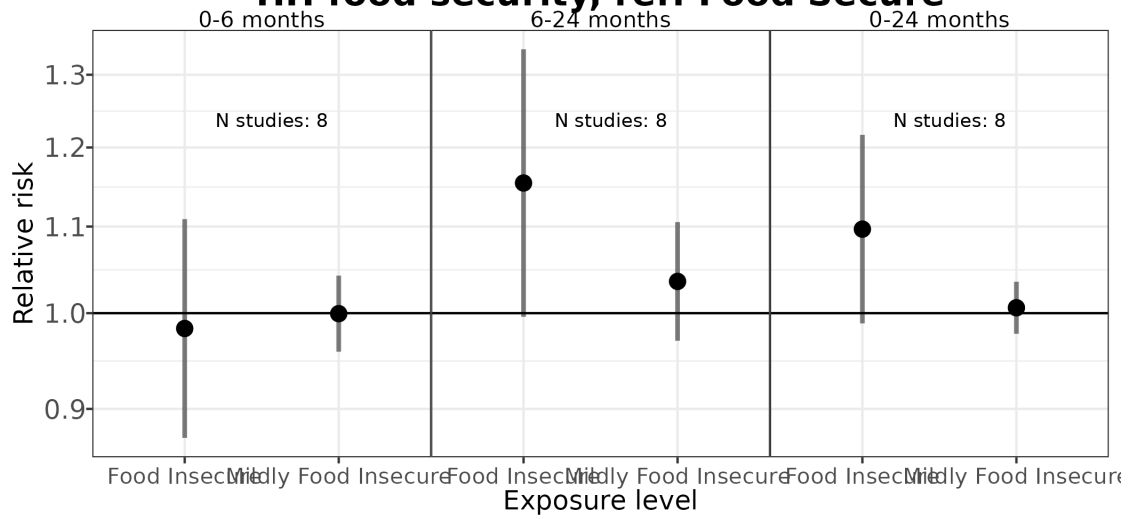

**Outcome: Ever Stunted**  
**Exposure:**  
**HH wealth, ref: Q4**

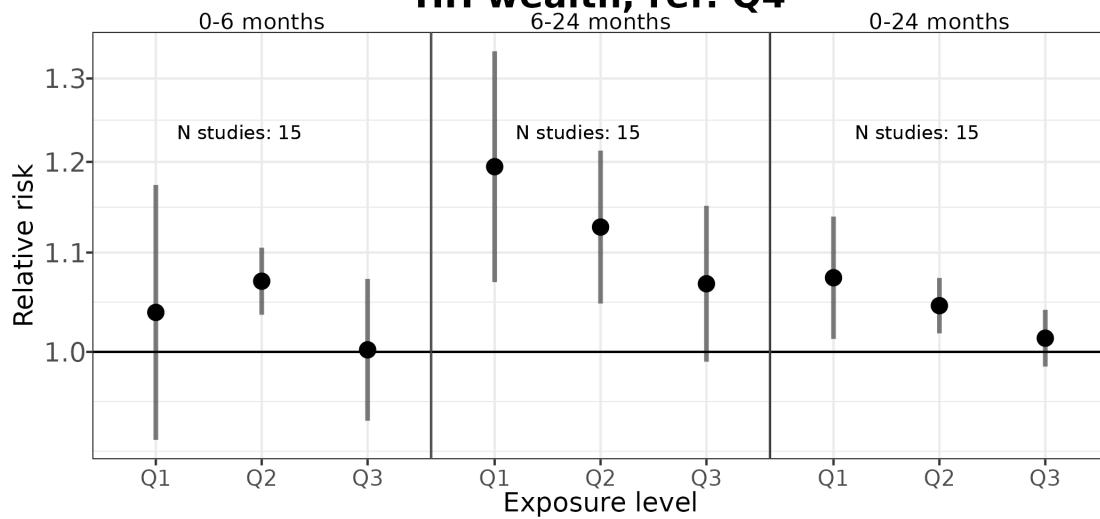

**Outcome: Ever Stunted**  
**Exposure:**  
**Improved floor, ref: Yes**

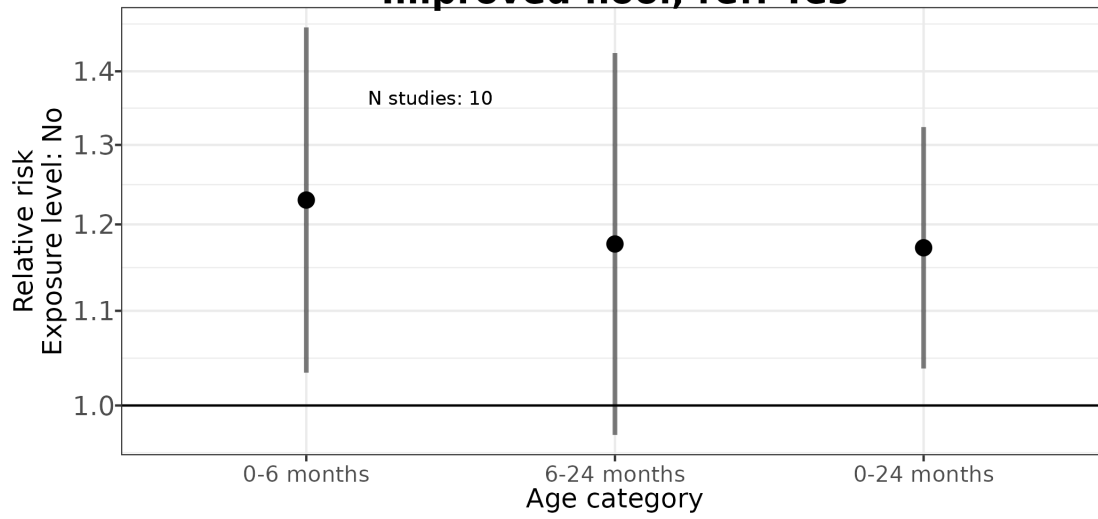

**Outcome: Ever Stunted**  
**Exposure:**  
**Improved sanitation, ref: Yes**

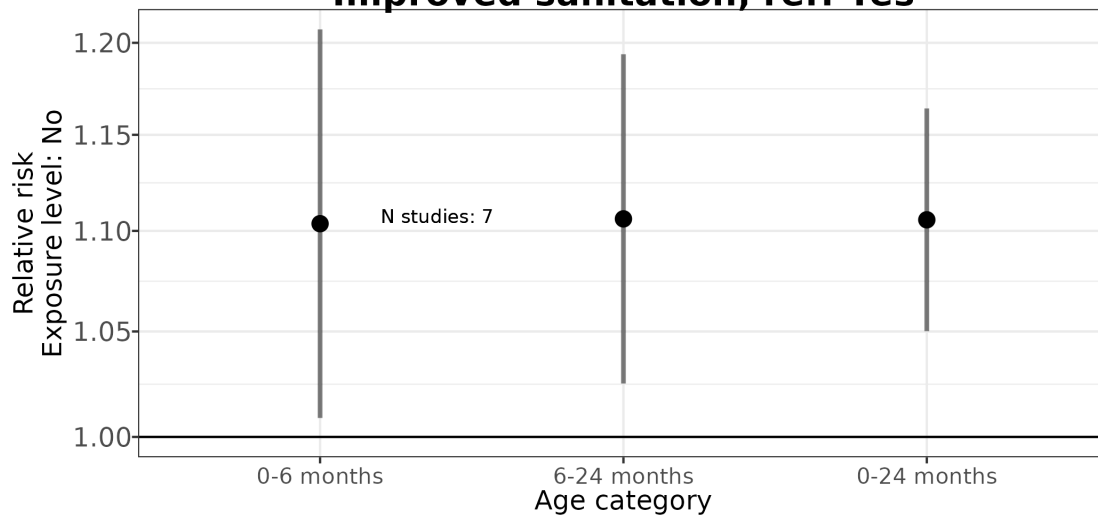

**Outcome: Ever Stunted**  
**Exposure:**  
**Mother's age, ref: [20-30)**

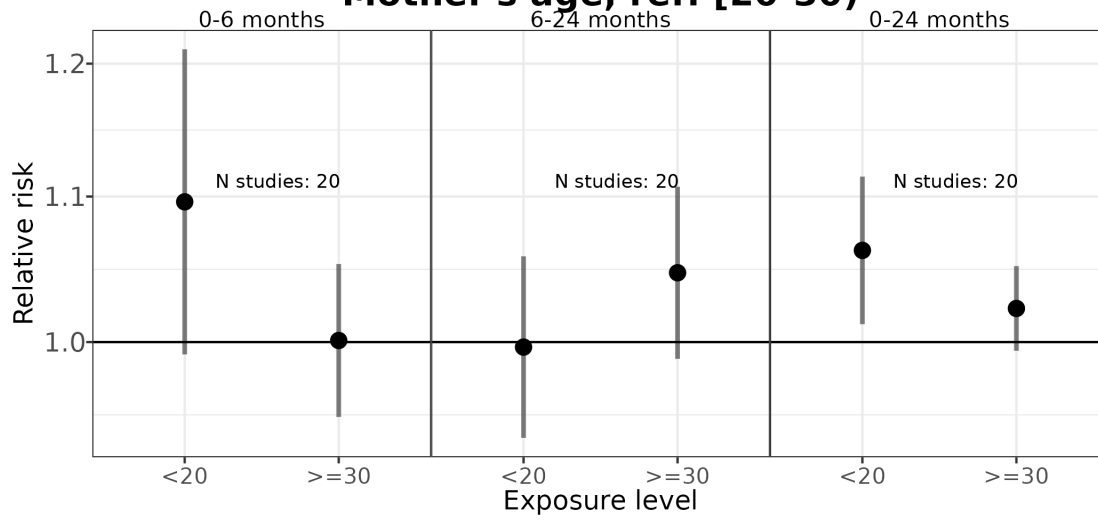

**Outcome: Ever Stunted**  
**Exposure:**  
**Mother's BMI, ref:  $\geq 20$  kg/m<sup>2</sup>**

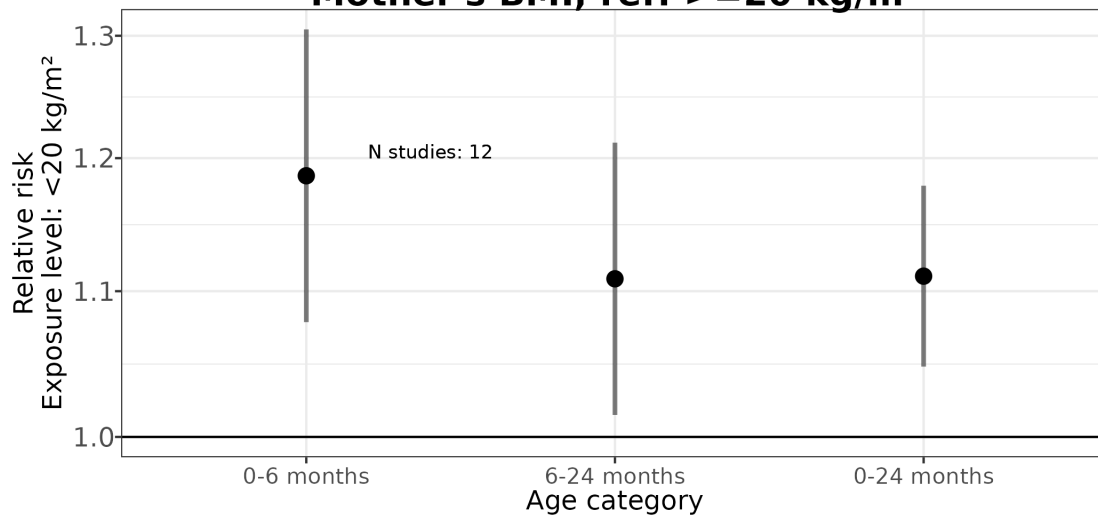



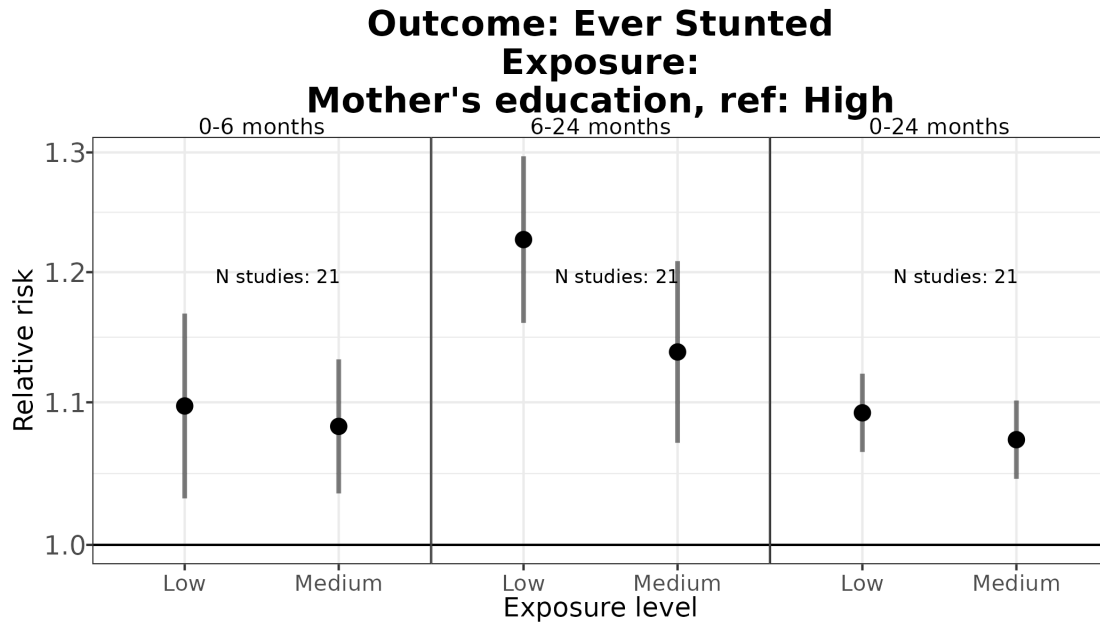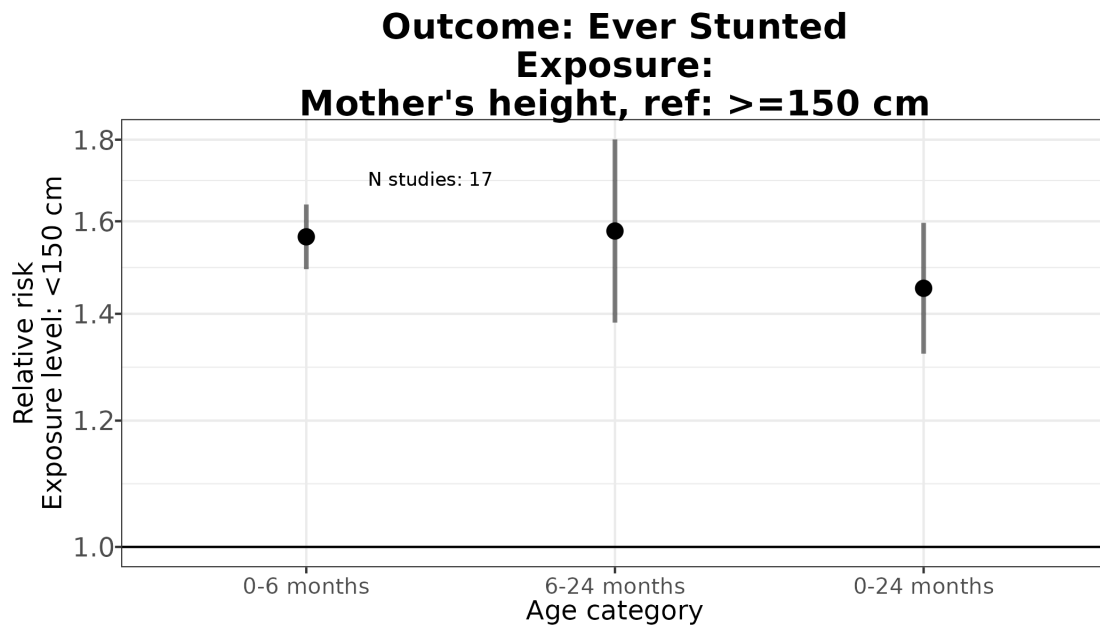

**Outcome: Ever Stunted**  
**Exposure:**  
**Mother's weight, ref:  $\geq 45$  kg**

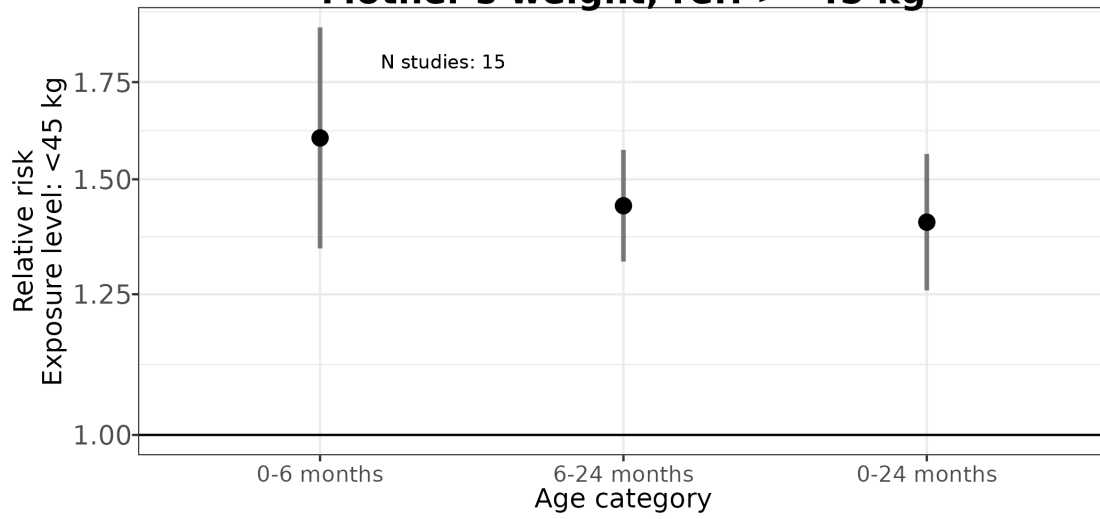

**Outcome: Ever Stunted**  
**Exposure:**  
**# of children <5 in HH, ref: 1**

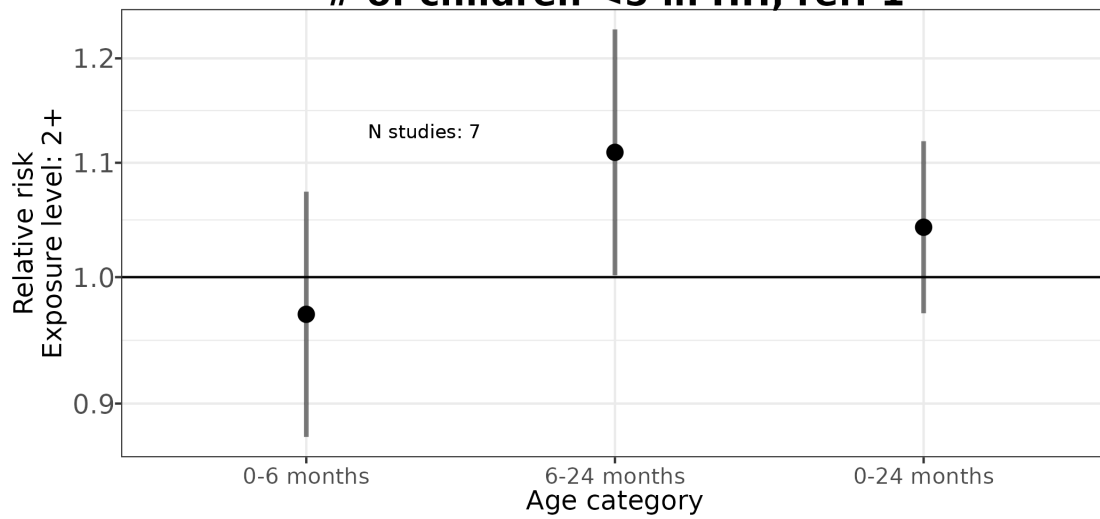

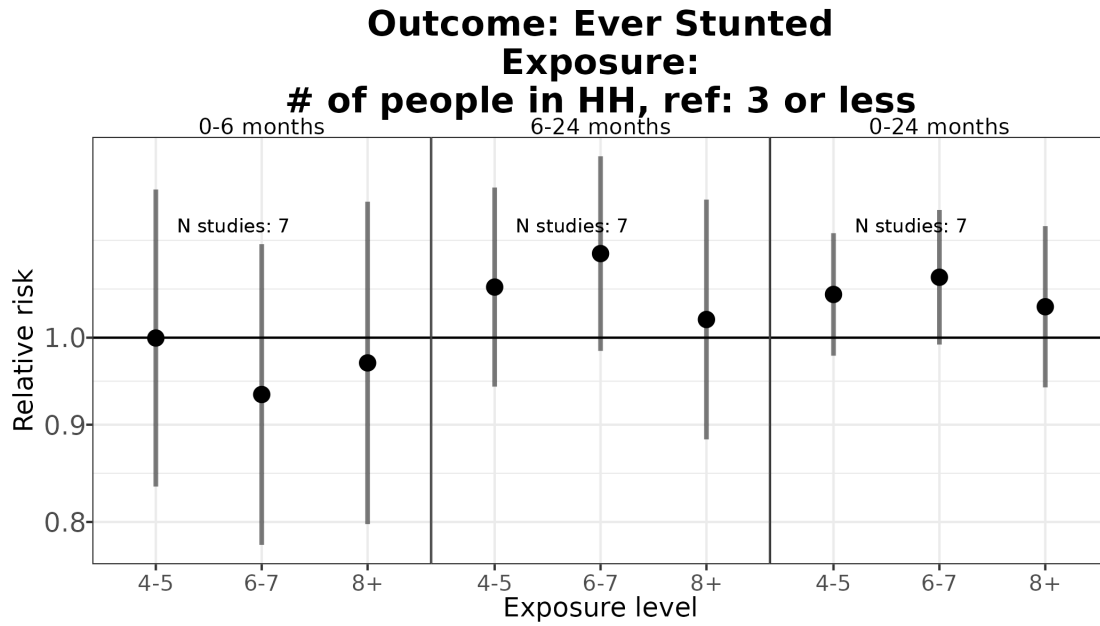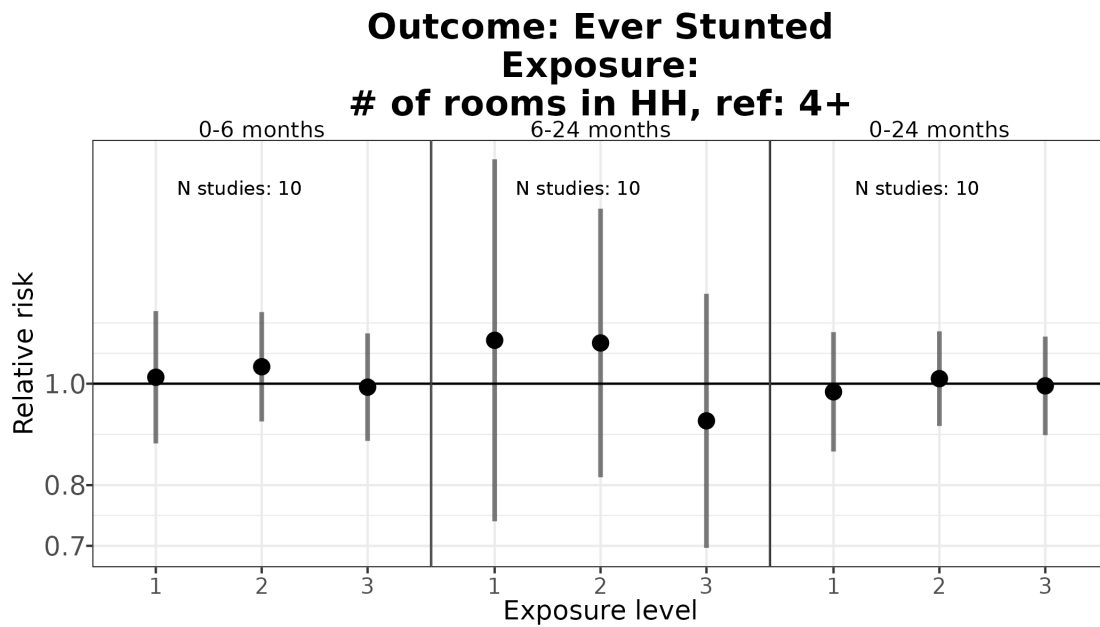

**Outcome: Ever Stunted**  
**Exposure:**  
**Birth order, ref: 1**

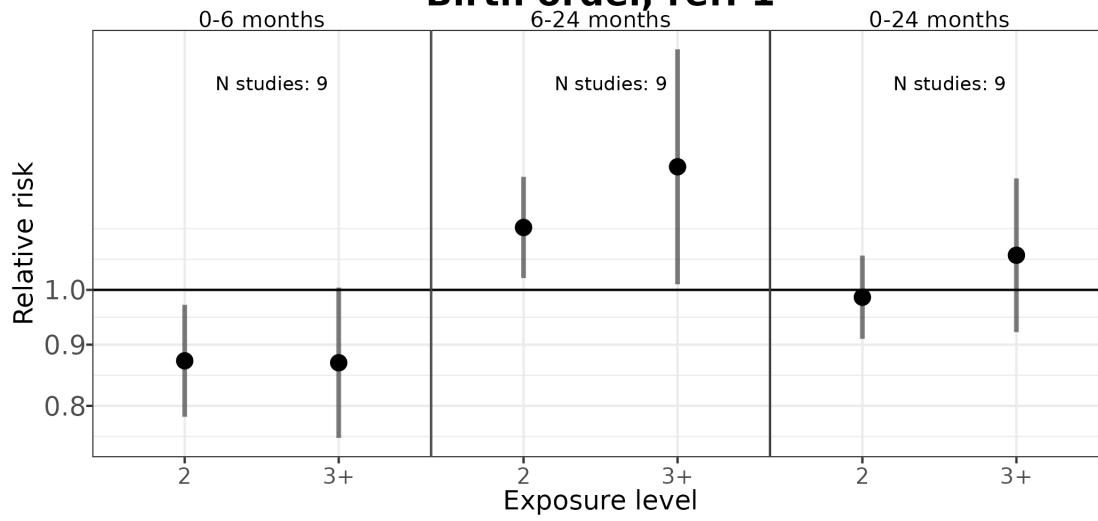

**Outcome: Ever Stunted**  
**Exposure:**  
**Safe water source, ref: Yes**

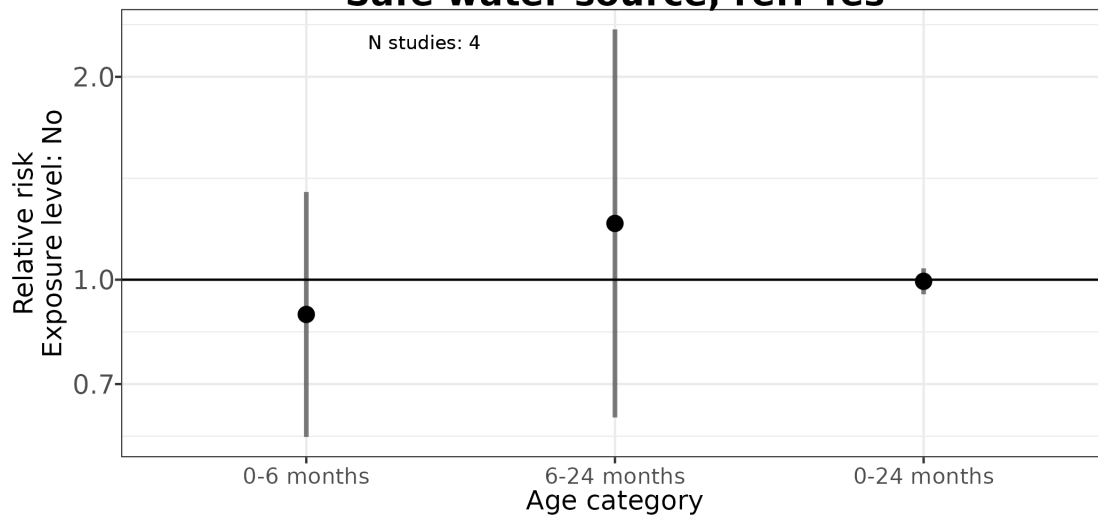

**Outcome: Ever Stunted**  
**Exposure:**  
**Sex, ref: Female**

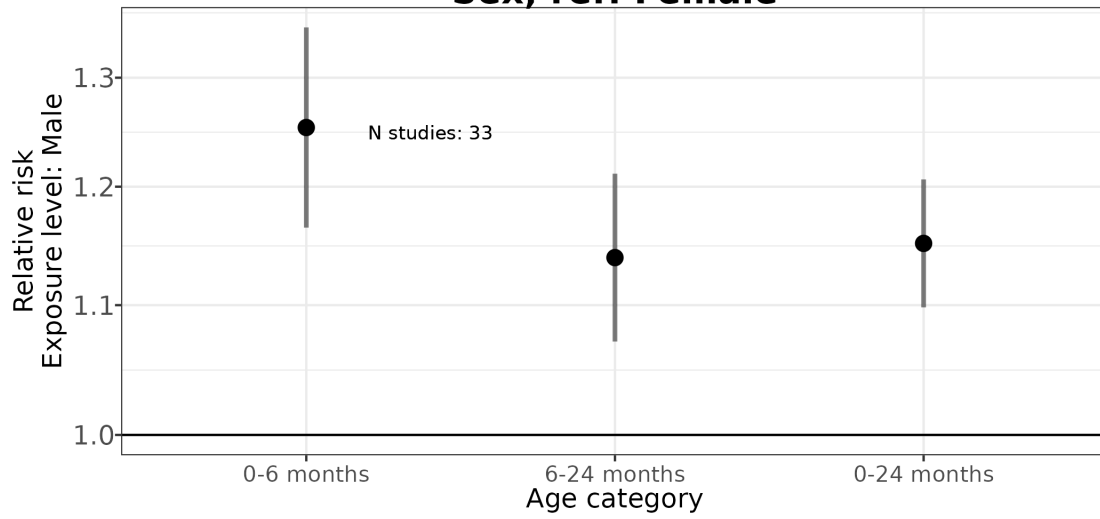

**Outcome: Ever Stunted**  
**Exposure:**  
**Small-for-gestational age, ref: Not SGA**

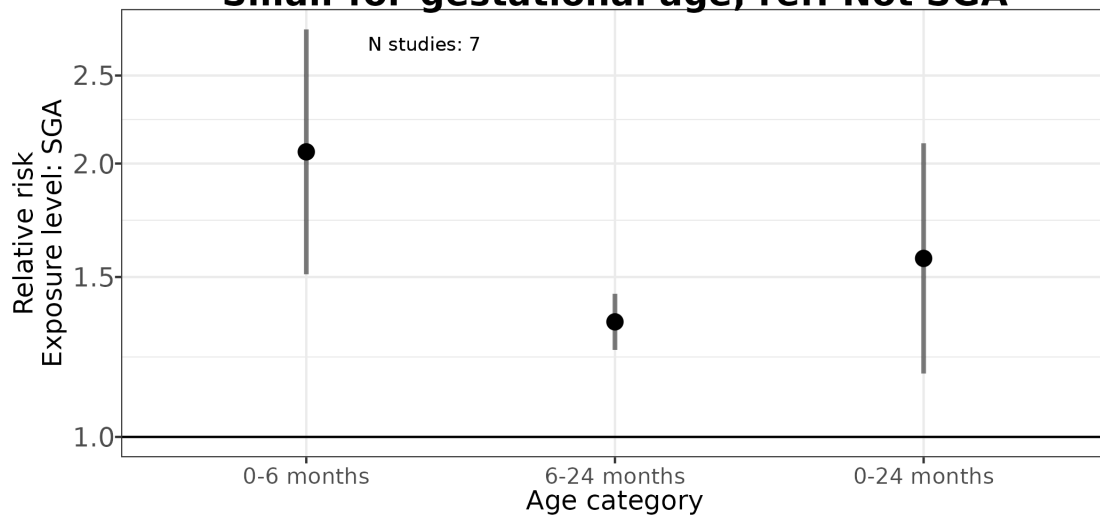

**Outcome: Ever Stunted**  
**Exposure:**  
**Single parent, ref: 0**

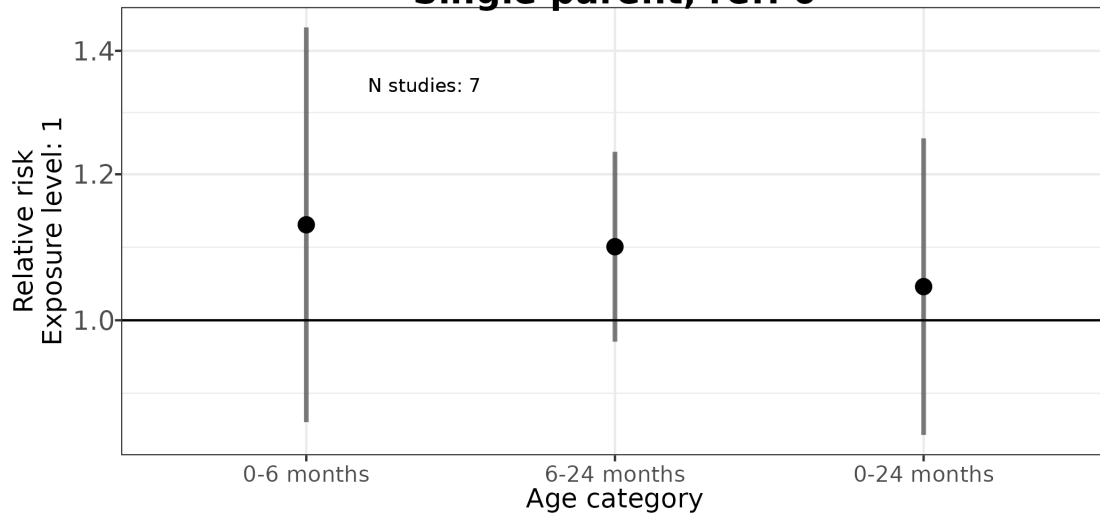

**Outcome: Wasted**  
**Exposure:**  
**Birth length (cm), ref:  $\geq 50$  cm**

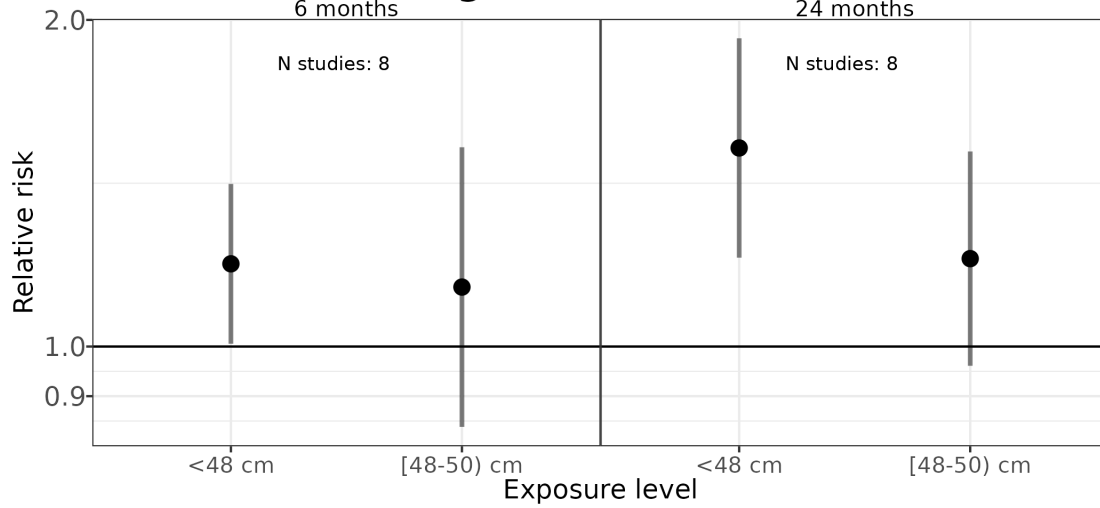

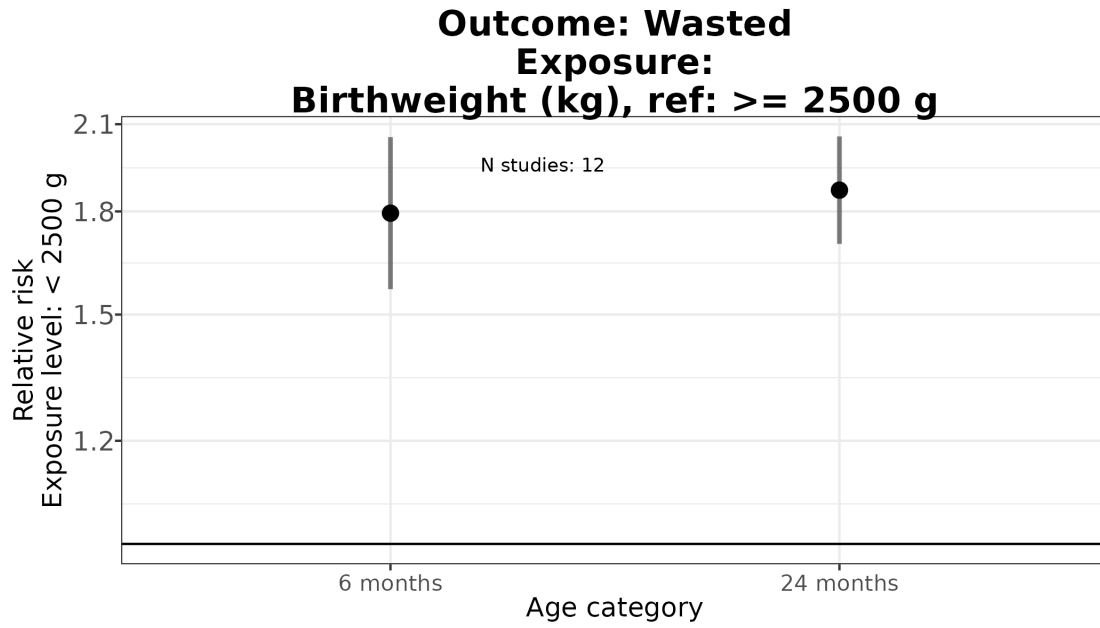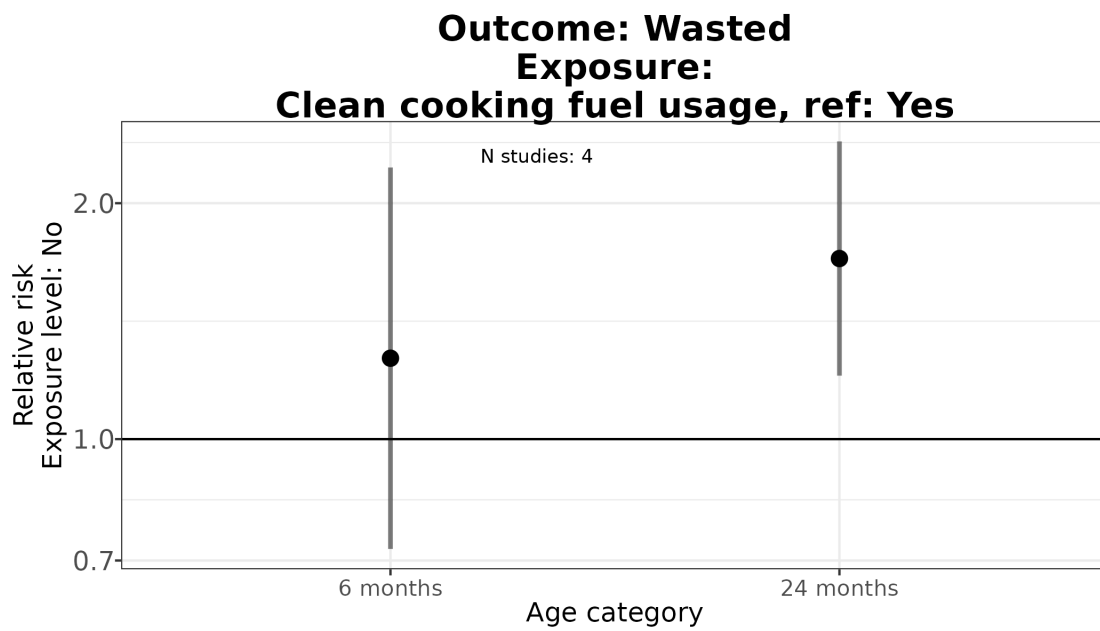

**Outcome: Wasted**  
**Exposure:**  
**Breastfed hour after birth, ref: Yes**

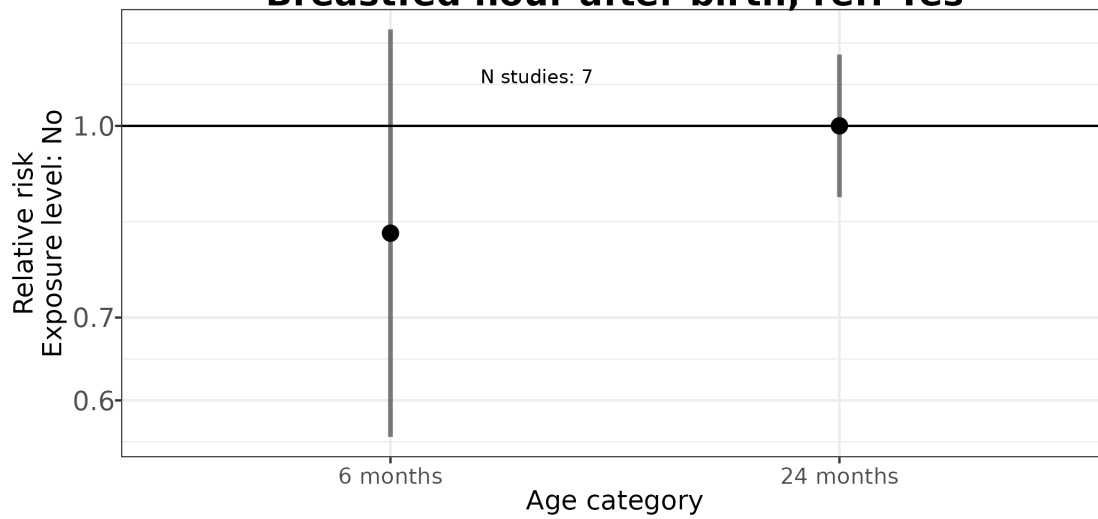

**Outcome: Wasted**  
**Exposure:**  
**Father's age, ref: >=35**

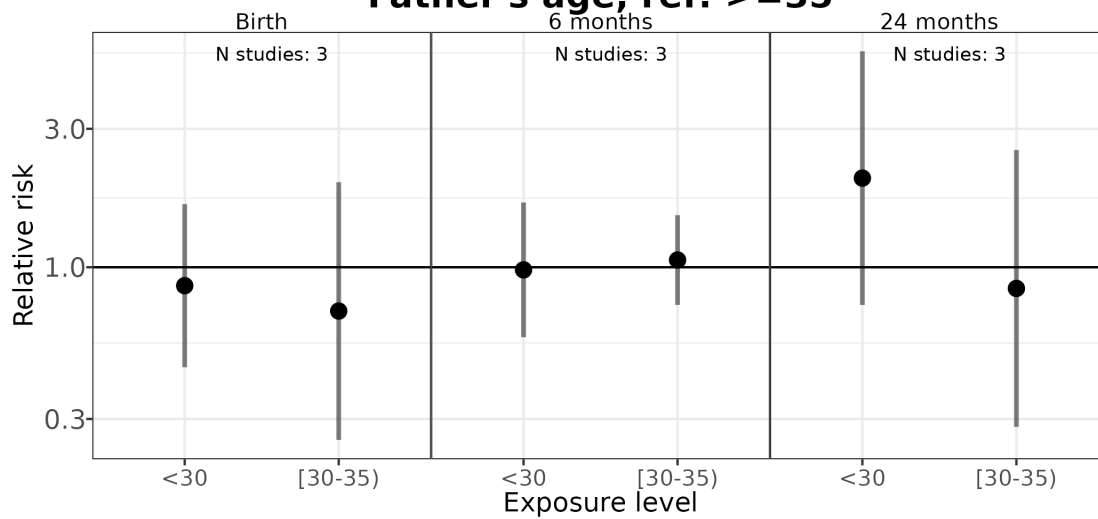



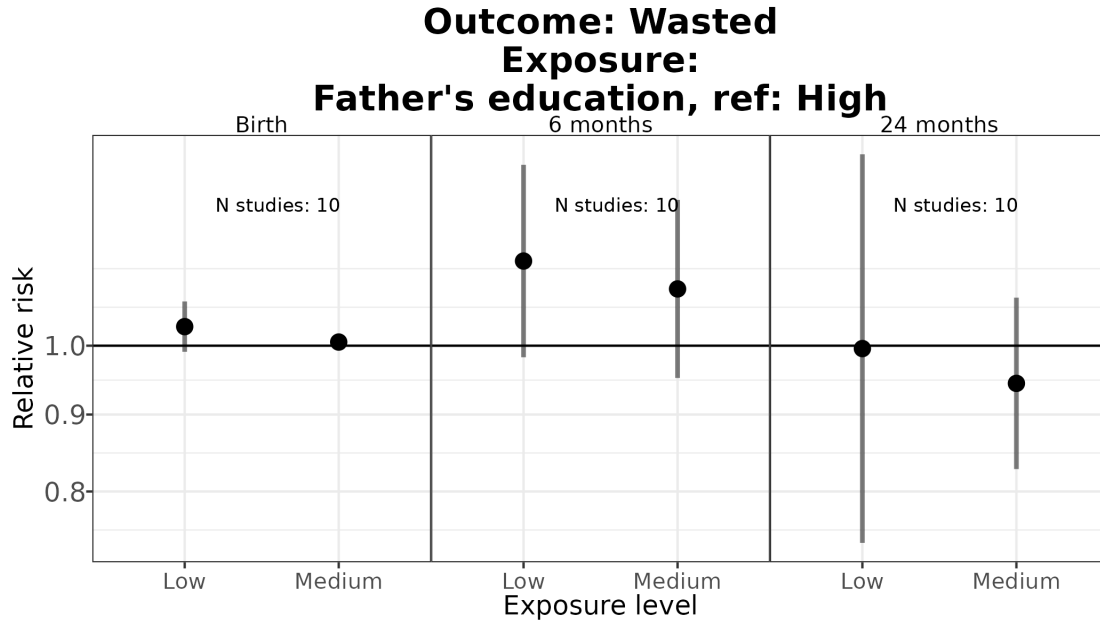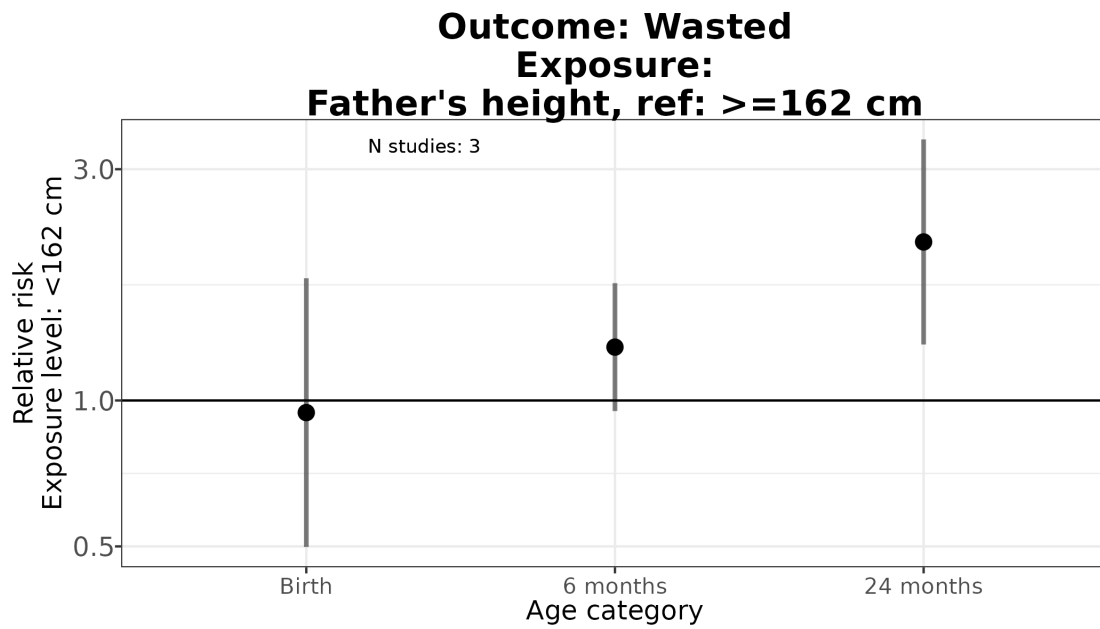

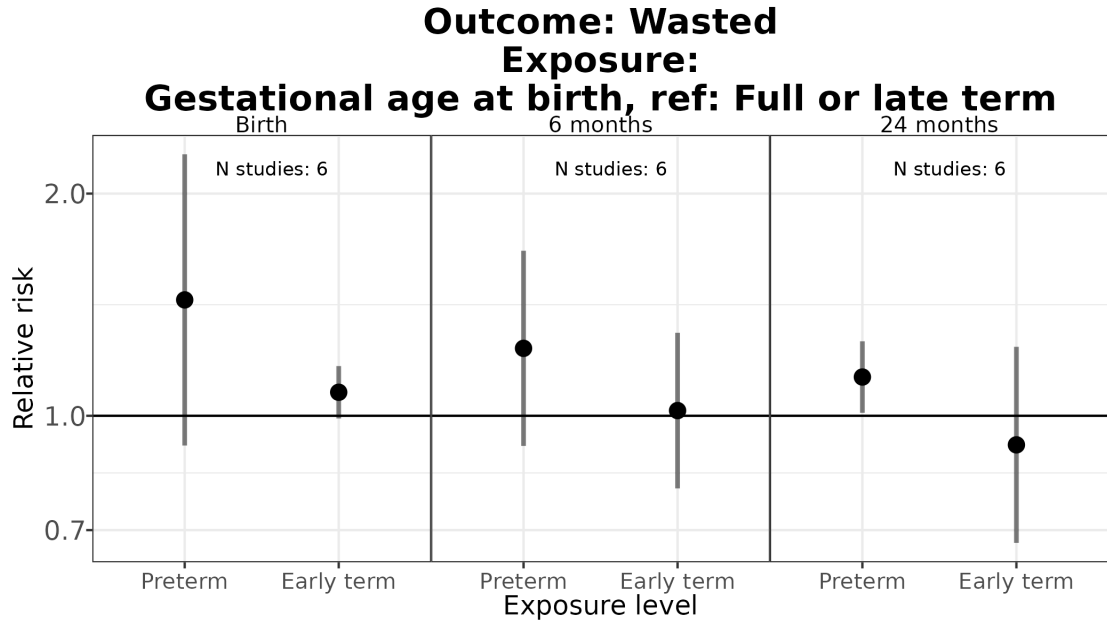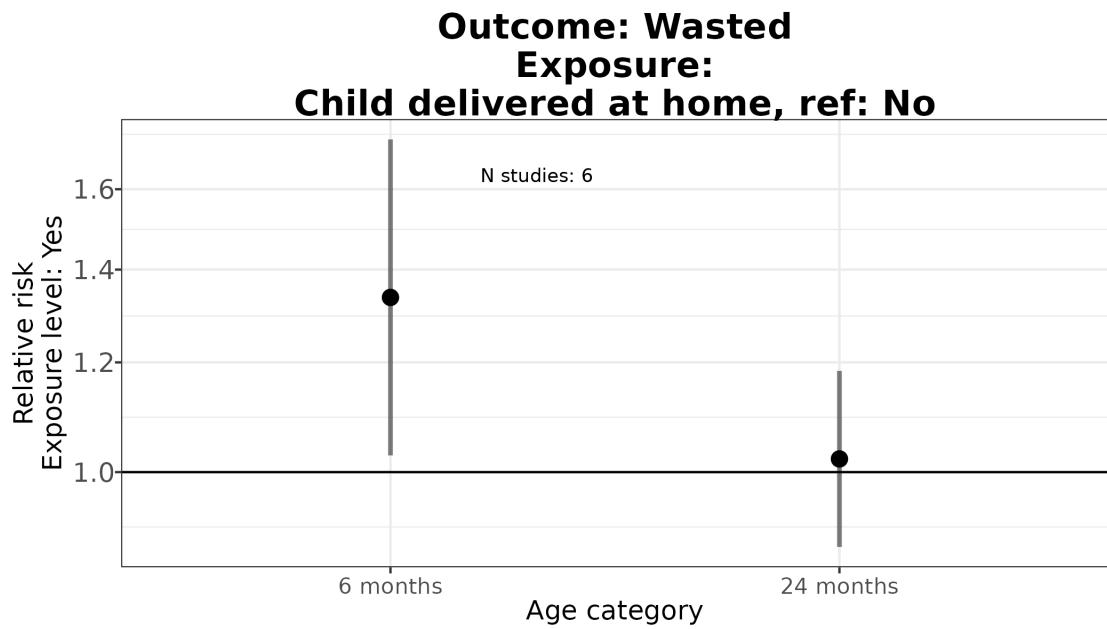

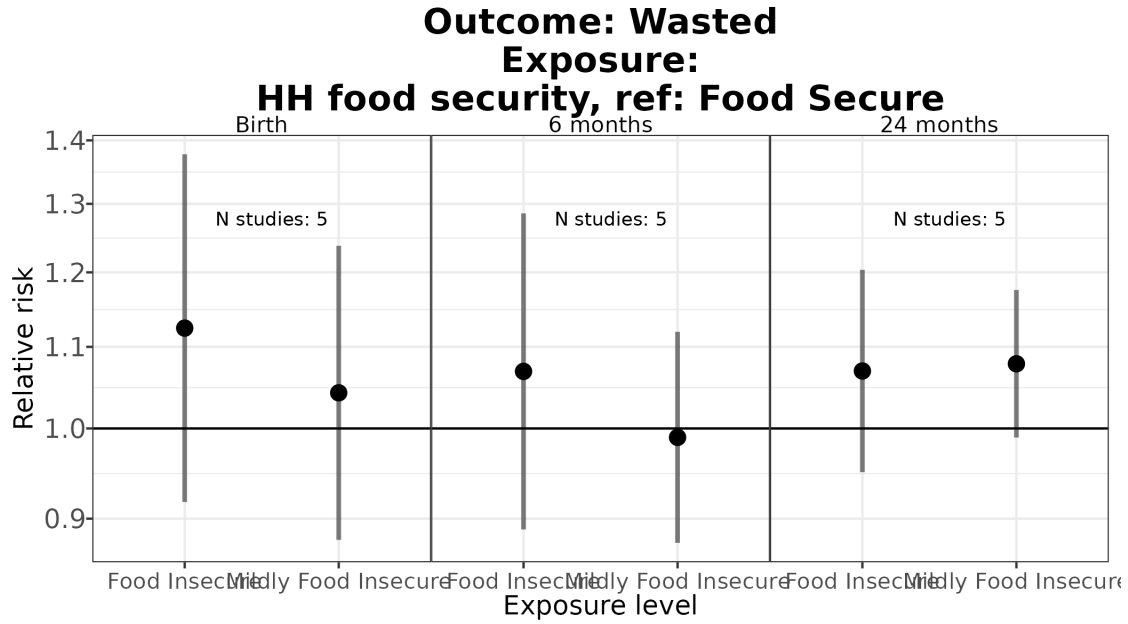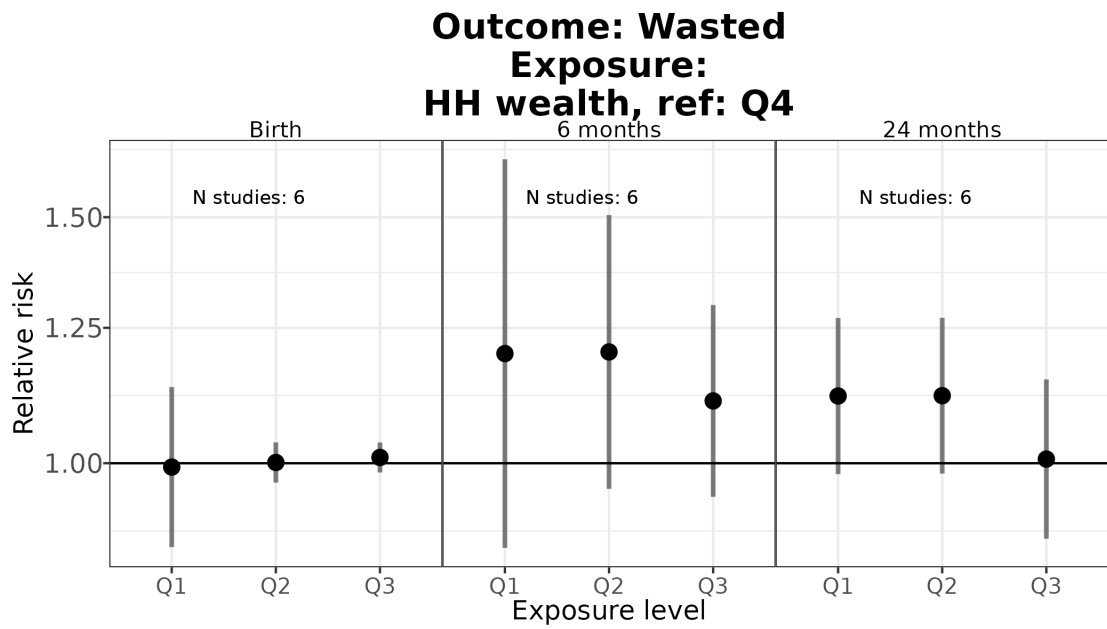

**Outcome: Wasted**  
**Exposure:**  
**Improved floor, ref: Yes**

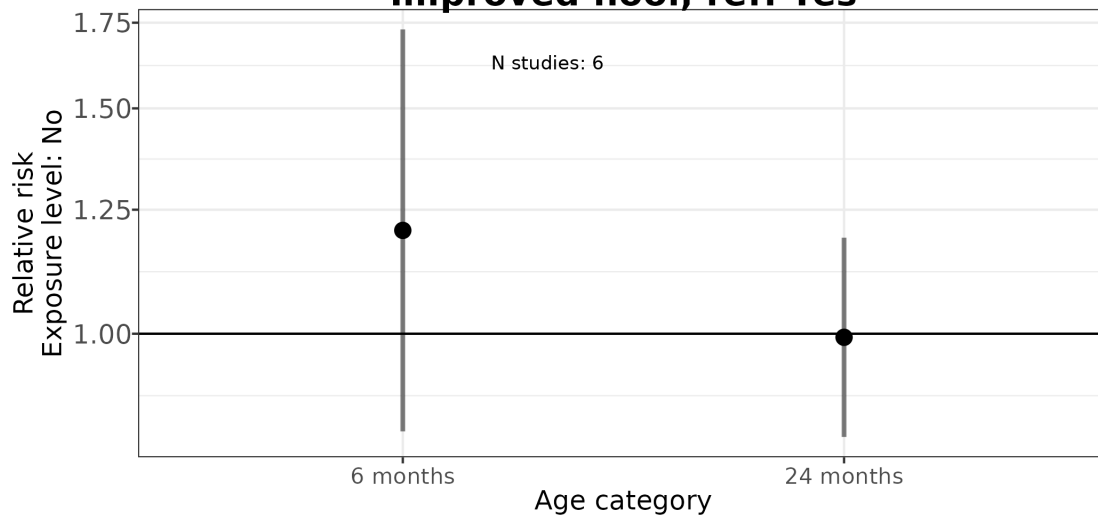

**Outcome: Wasted**  
**Exposure:**  
**Improved sanitation, ref: Yes**

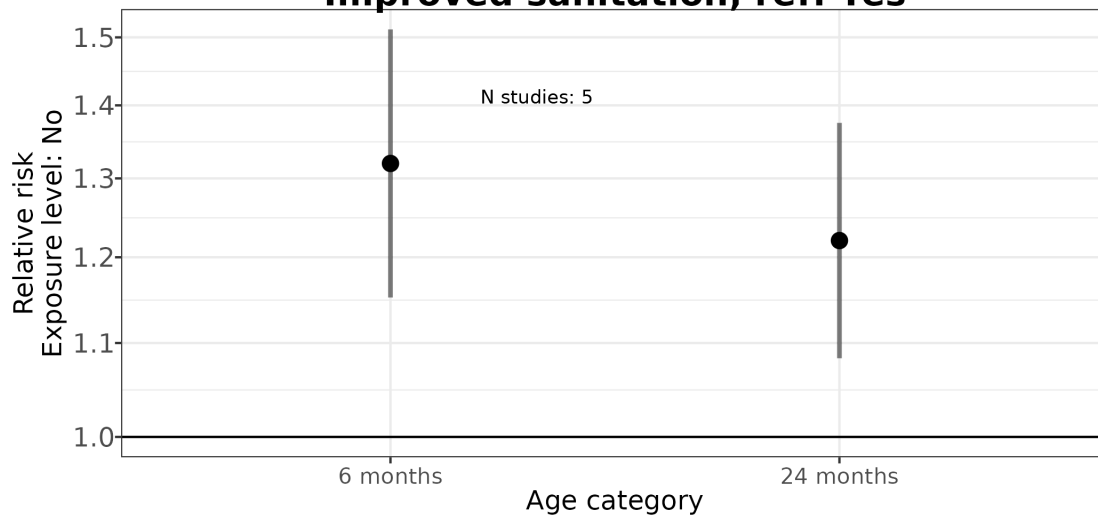

**Outcome: Wasted**  
**Exposure:**  
**Mother's age, ref: [20-30)**

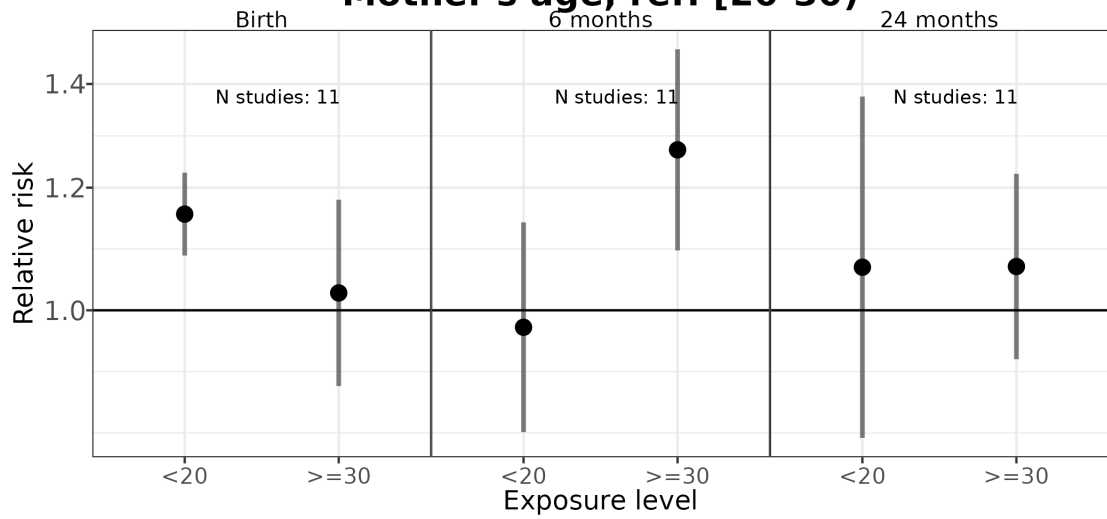

**Outcome: Wasted**  
**Exposure:**  
**Mother's BMI, ref: >=20 kg/m<sup>2</sup>**

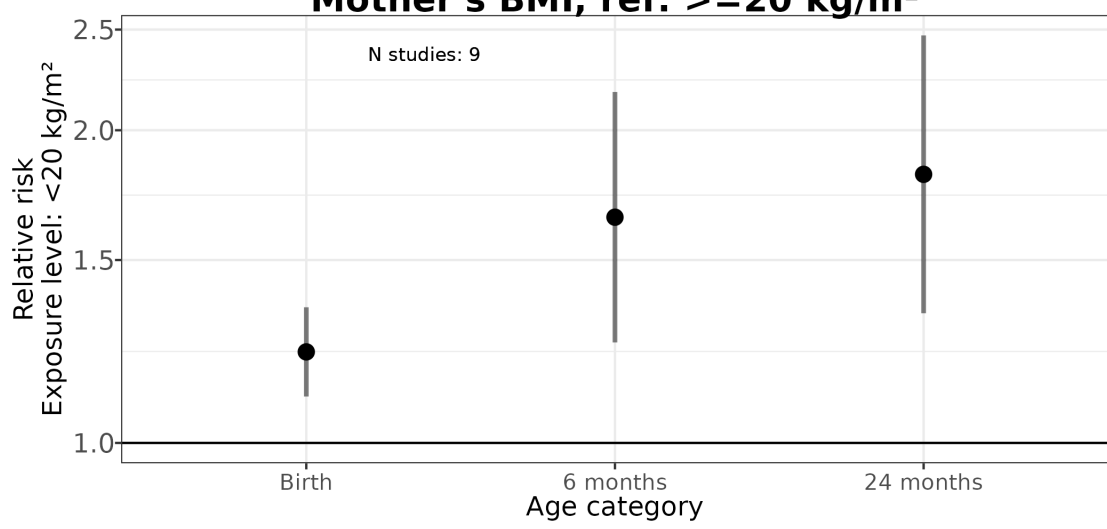

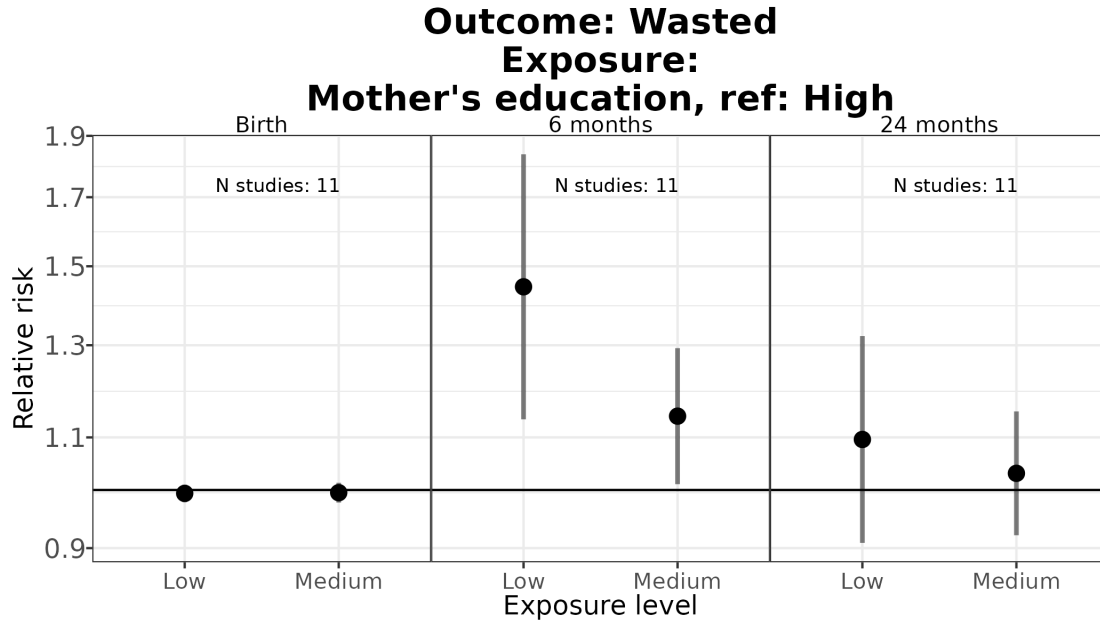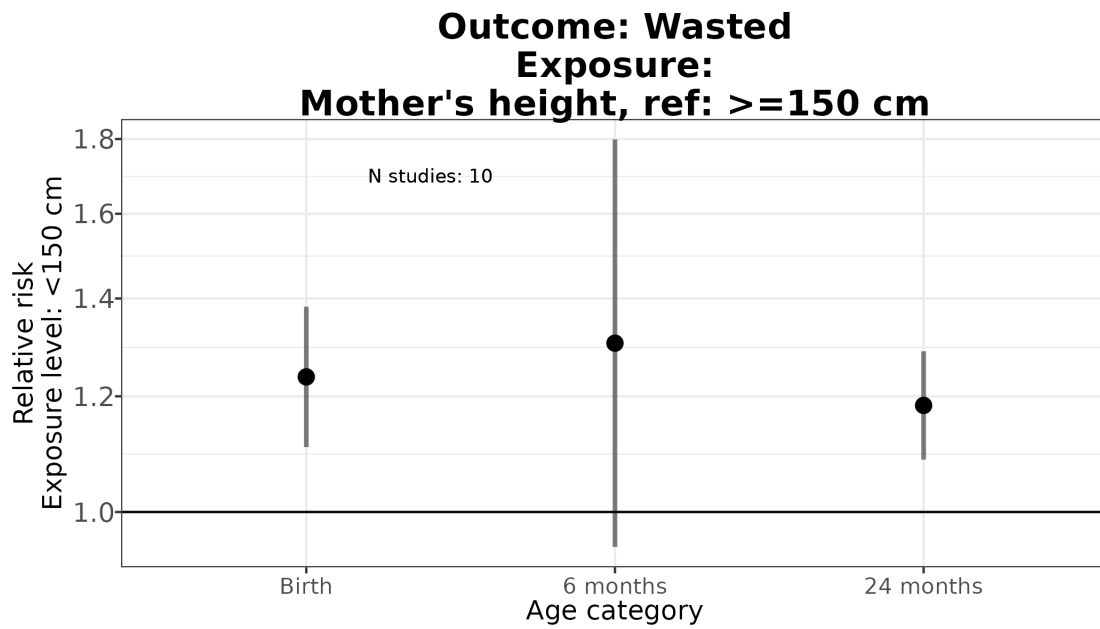

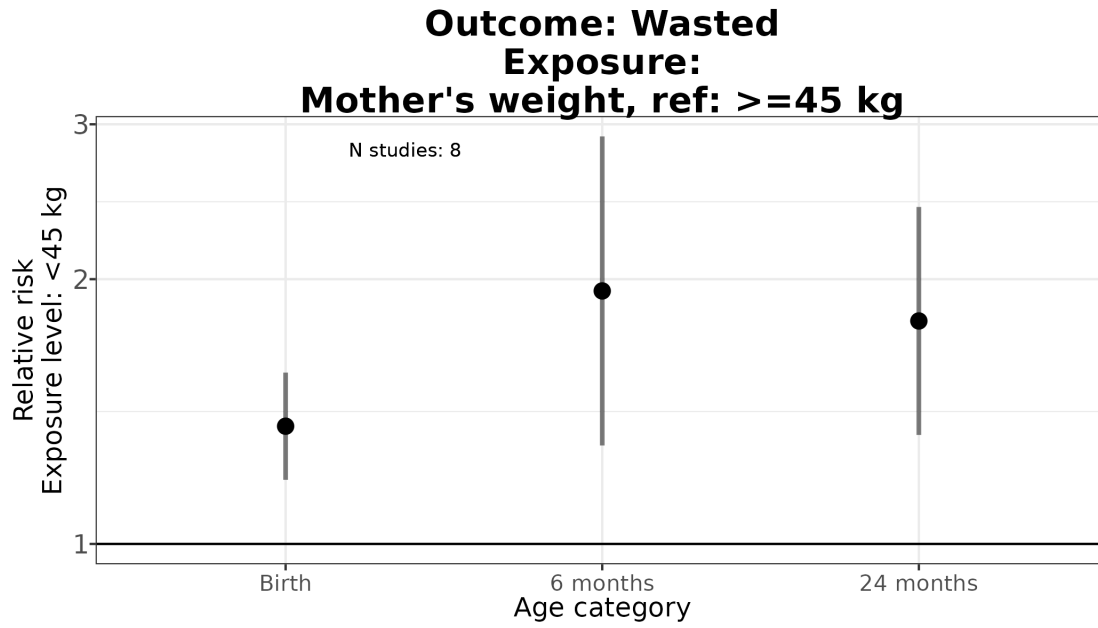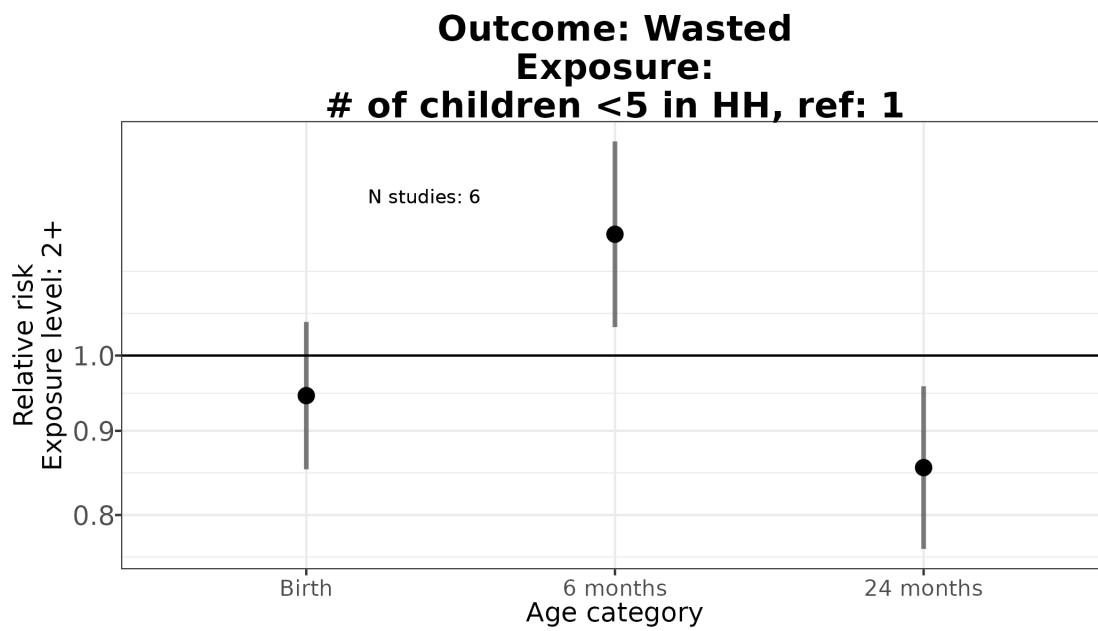

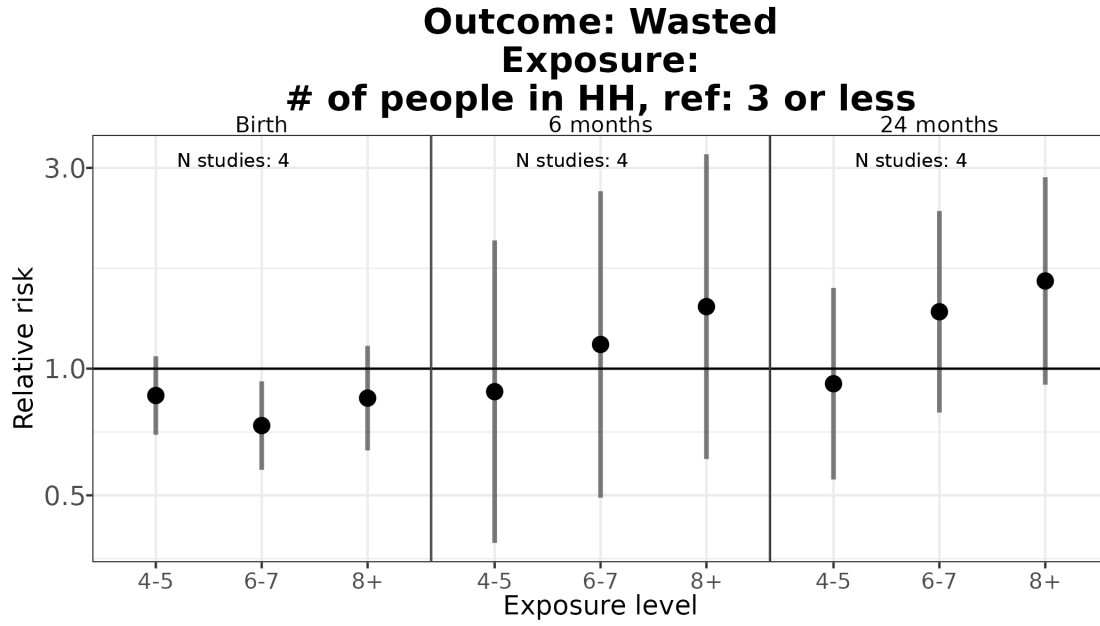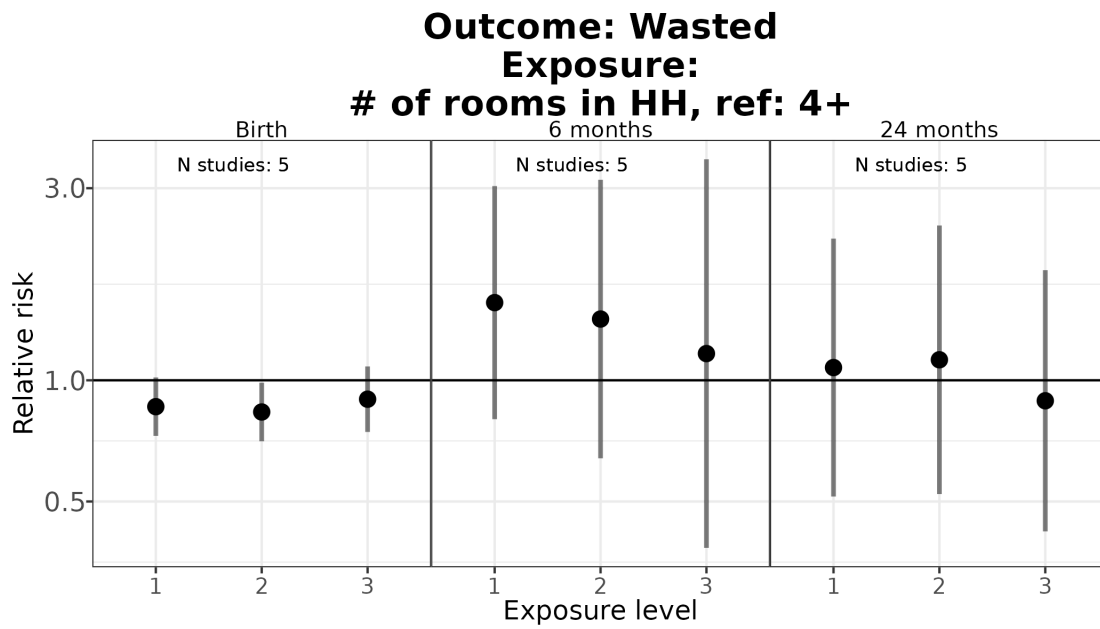



**Outcome: Wasted**  
**Exposure:**  
**Birth order, ref: 1**

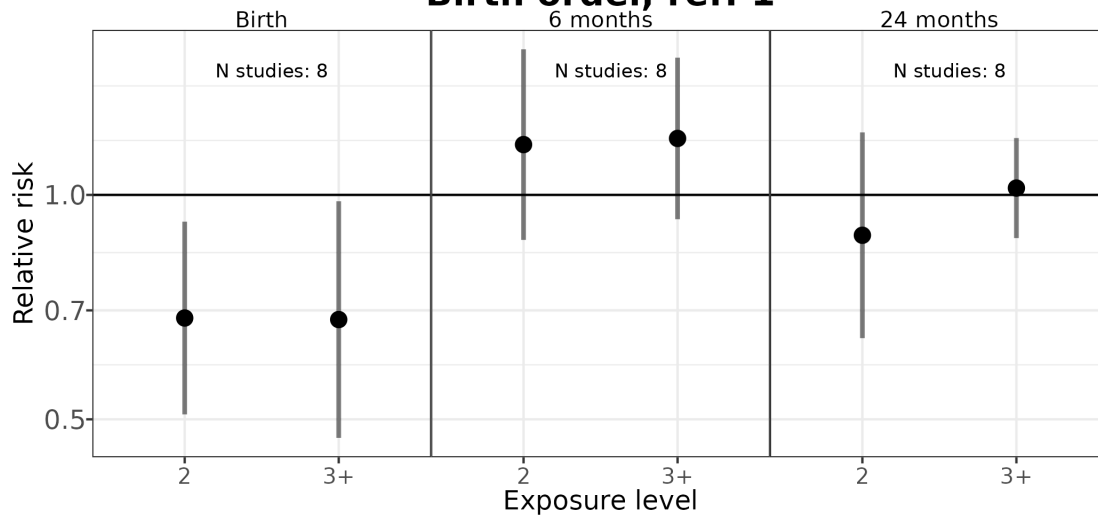

**Outcome: Wasted**  
**Exposure:**  
**Diarrhea <6 mo. (% days), ref: [0%, 2%]**

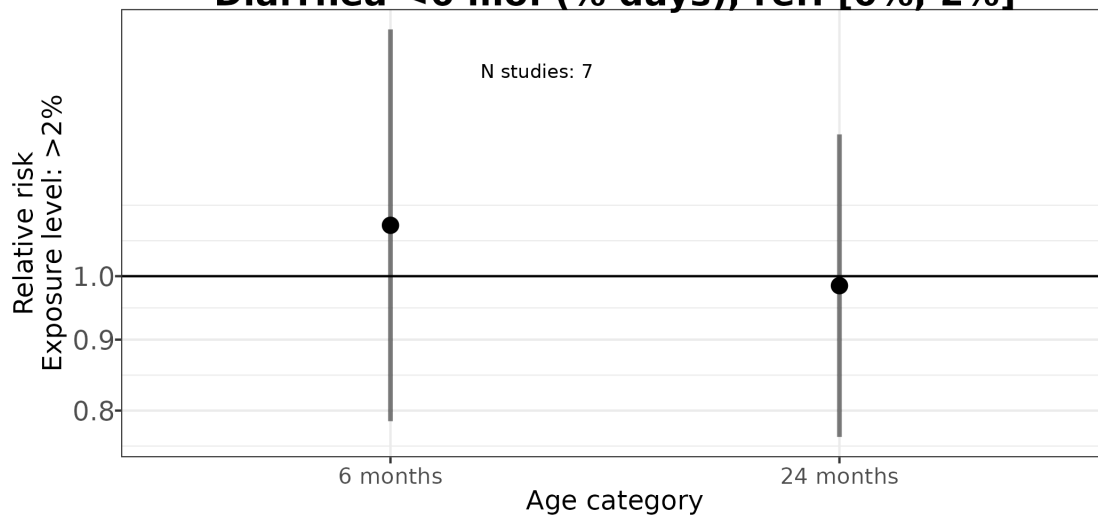

**Outcome: Wasted**  
**Exposure:**  
**Excl/Pred breastfed <6mo., ref: Yes**

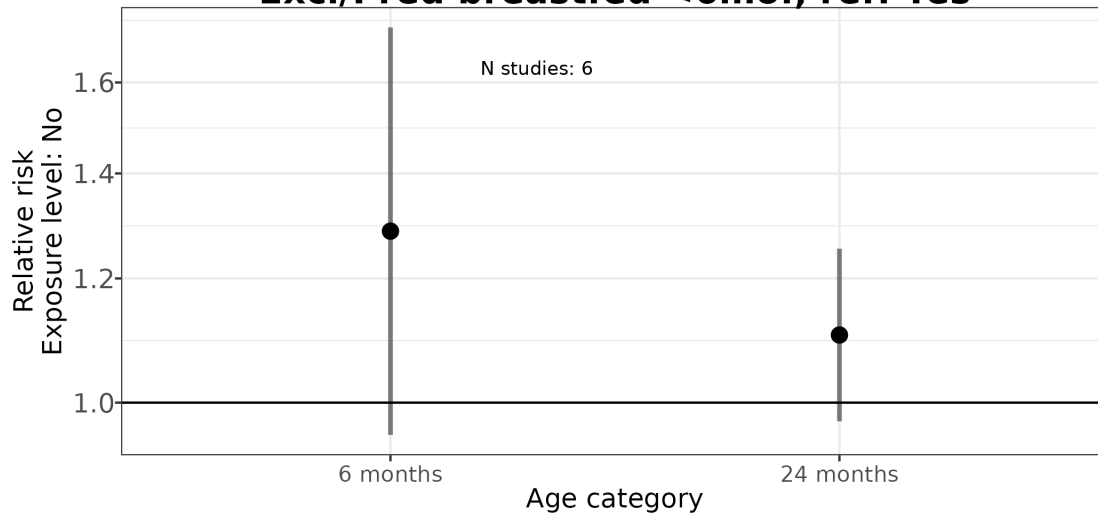

**Outcome: Wasted**  
**Exposure:**  
**Rain quartile, ref: Opposite max rain**

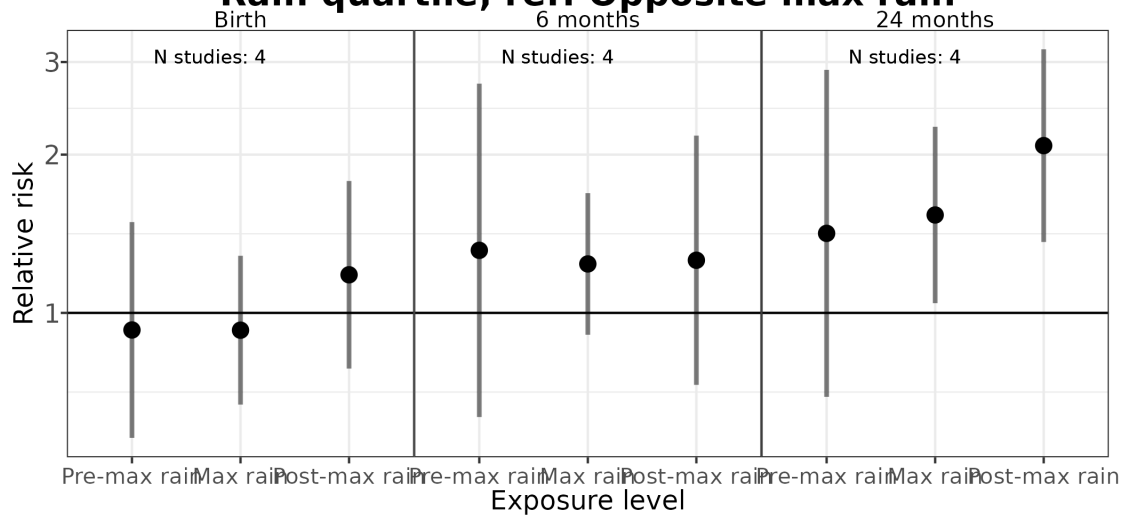

**Outcome: Wasted**  
**Exposure:**  
**Sex, ref: Female**

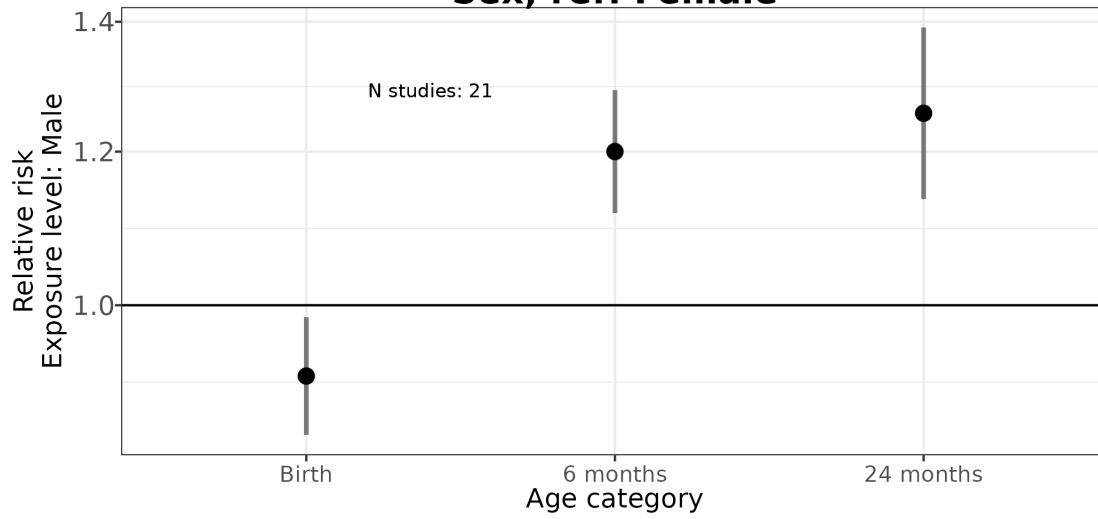

**Outcome: Wasted**  
**Exposure:**  
**Small-for-gestational age, ref: Not SGA**

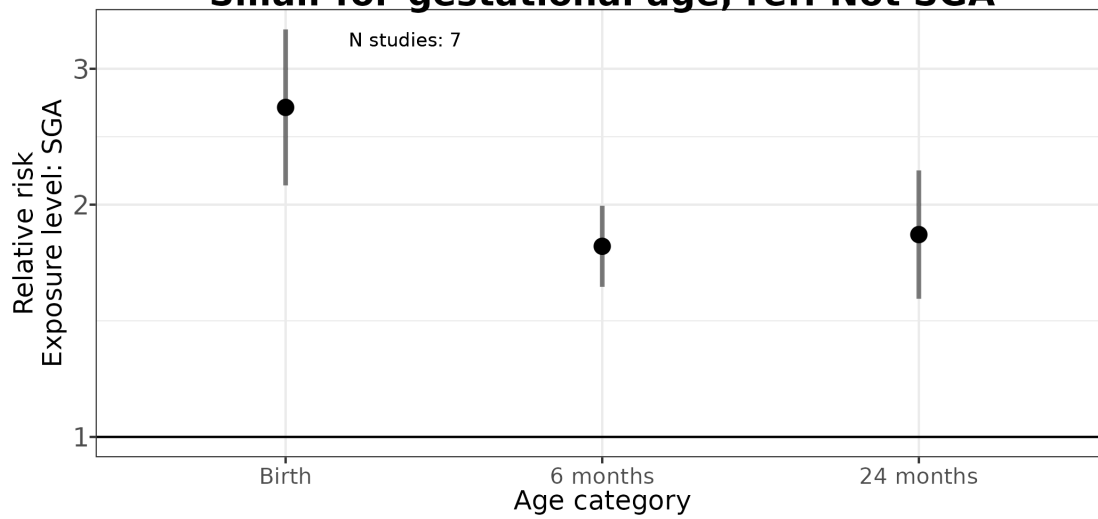

**Outcome: Wasted**  
**Exposure:**  
**Single parent, ref: 0**

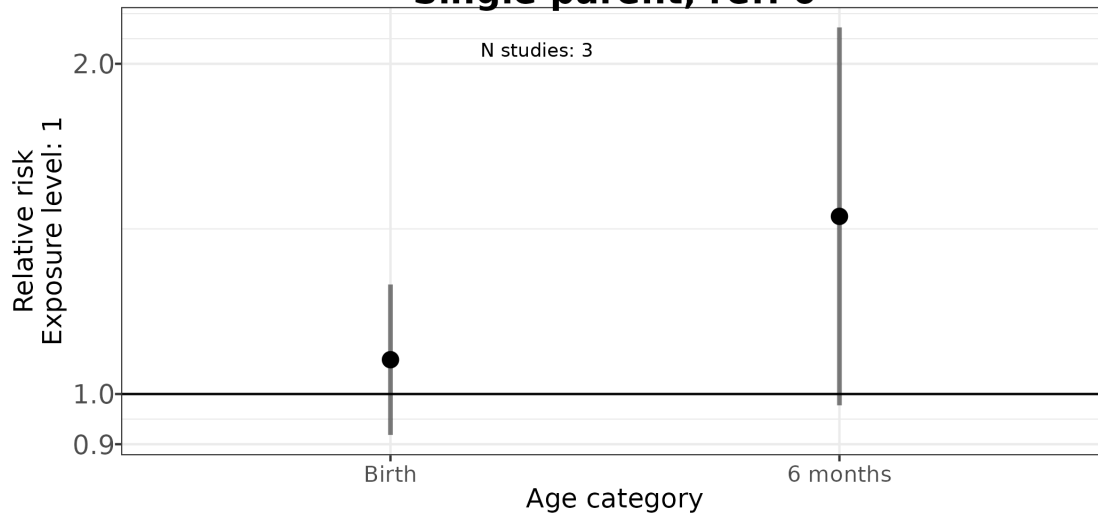

**Outcome: Ever Wasted**  
**Exposure:**  
**Birth length (cm), ref:  $\geq 50$  cm**

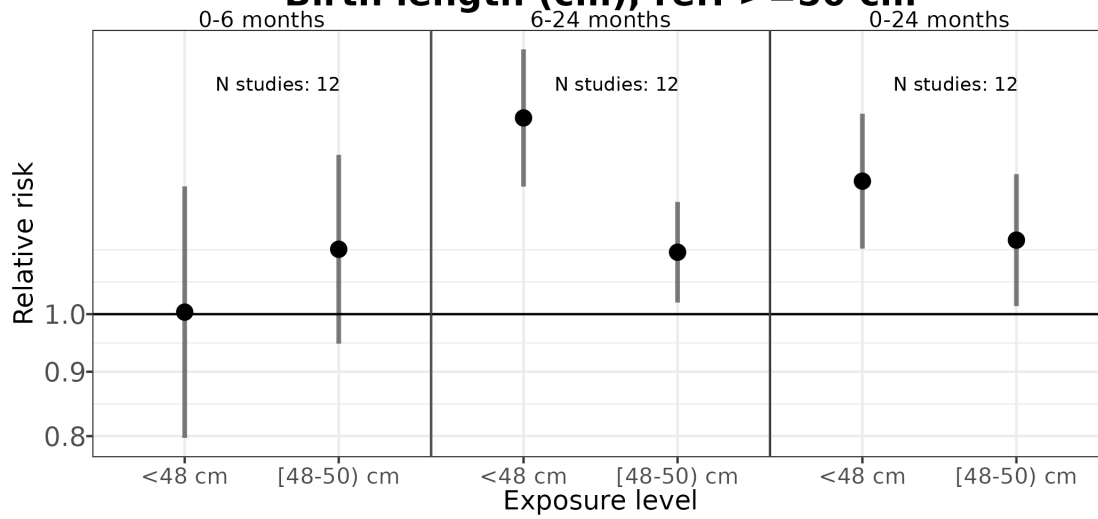

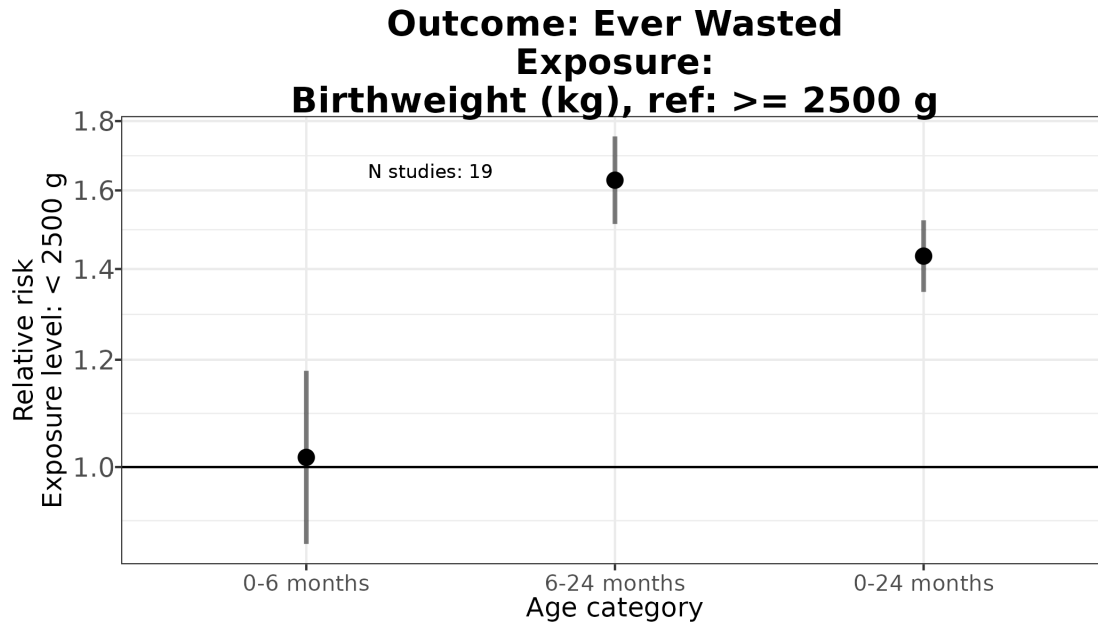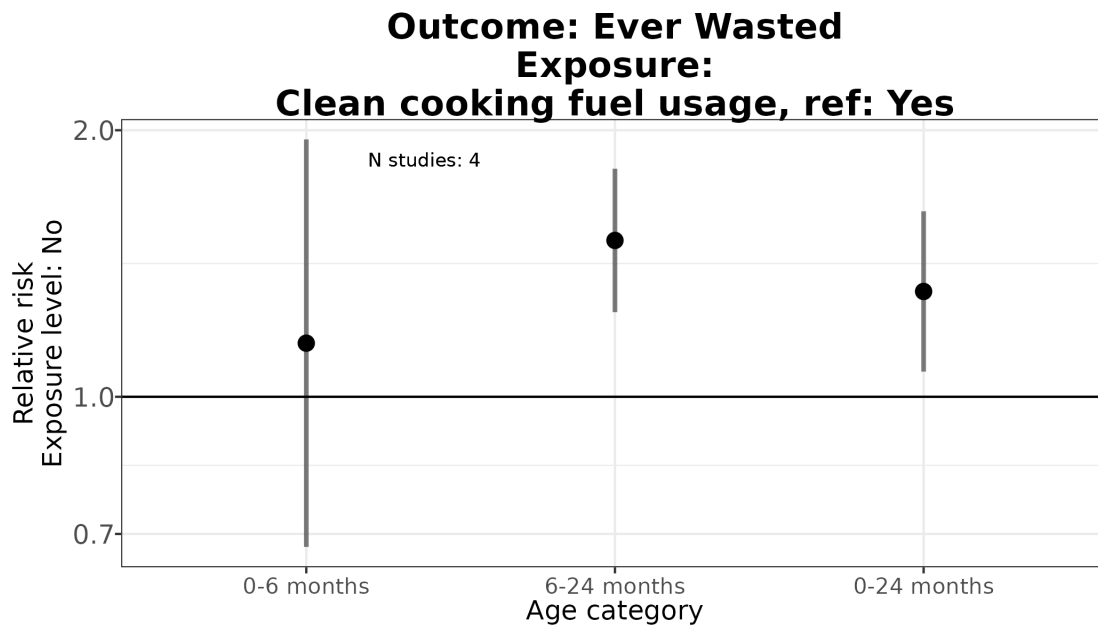

**Outcome: Ever Wasted**  
**Exposure:**  
**Breastfed hour after birth, ref: Yes**

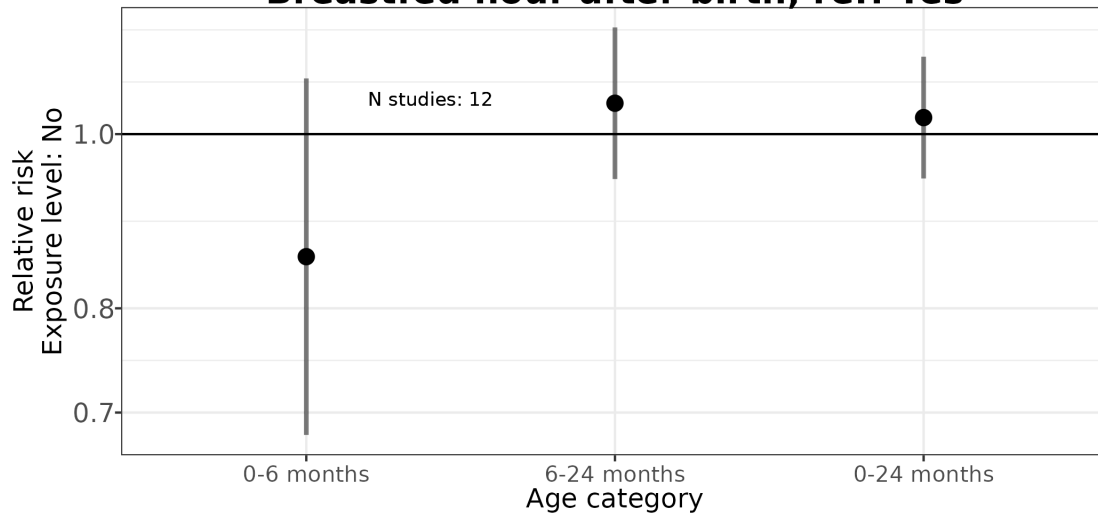

**Outcome: Ever Wasted**  
**Exposure:**  
**Father's age, ref: >=35**

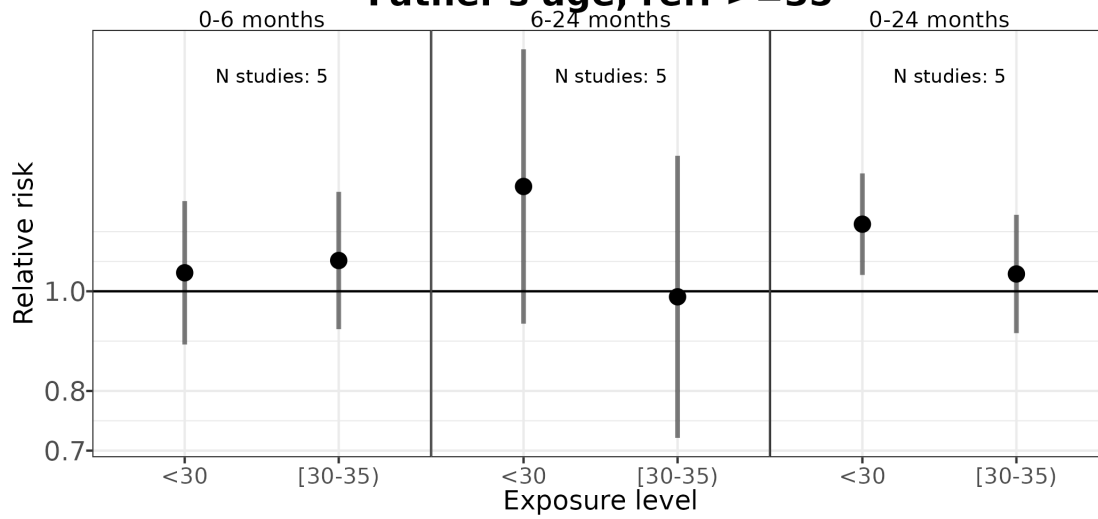

**Outcome: Ever Wasted**  
**Exposure:**  
**Father's education, ref: High**

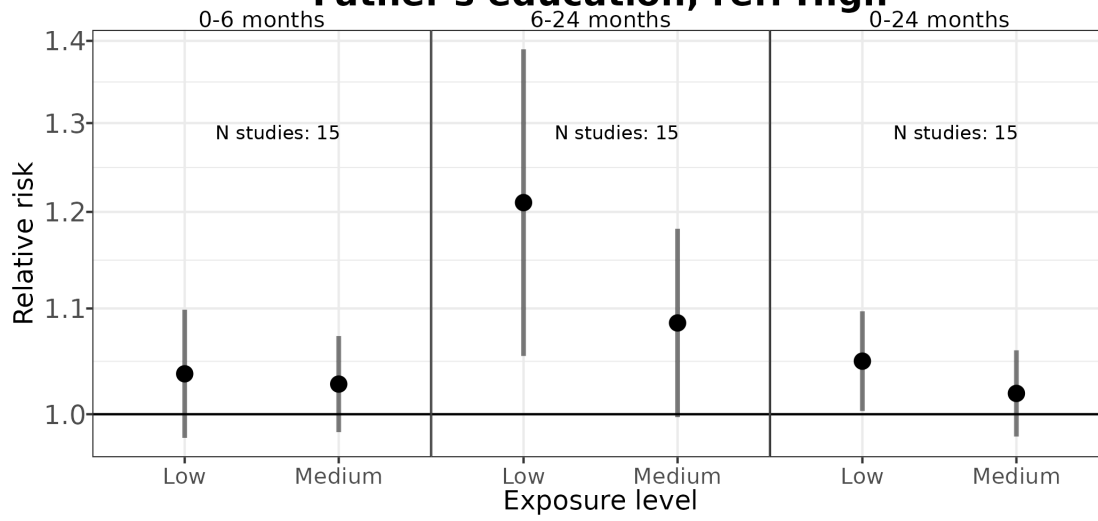

**Outcome: Ever Wasted**  
**Exposure:**  
**Father's height, ref:  $\geq 162$  cm**

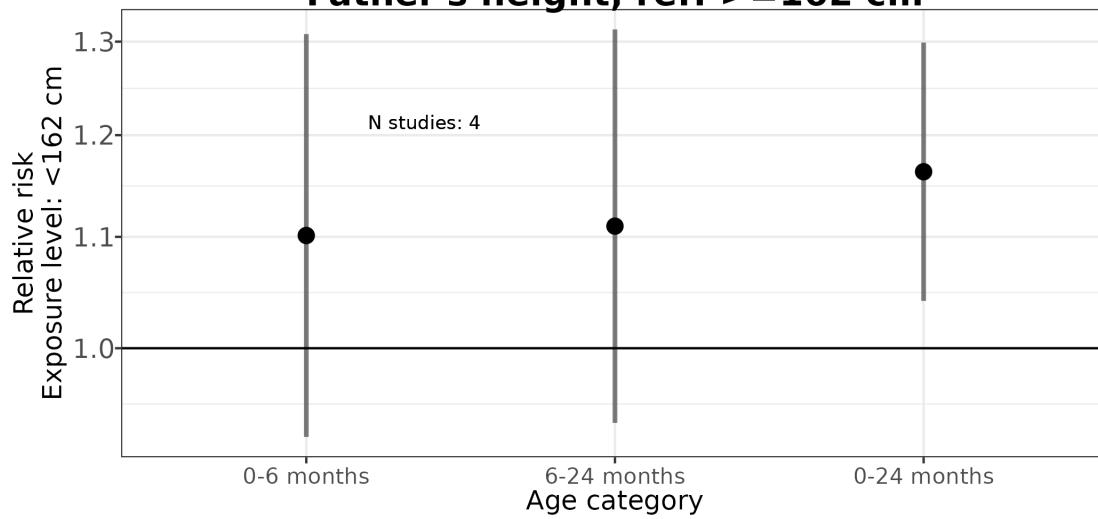

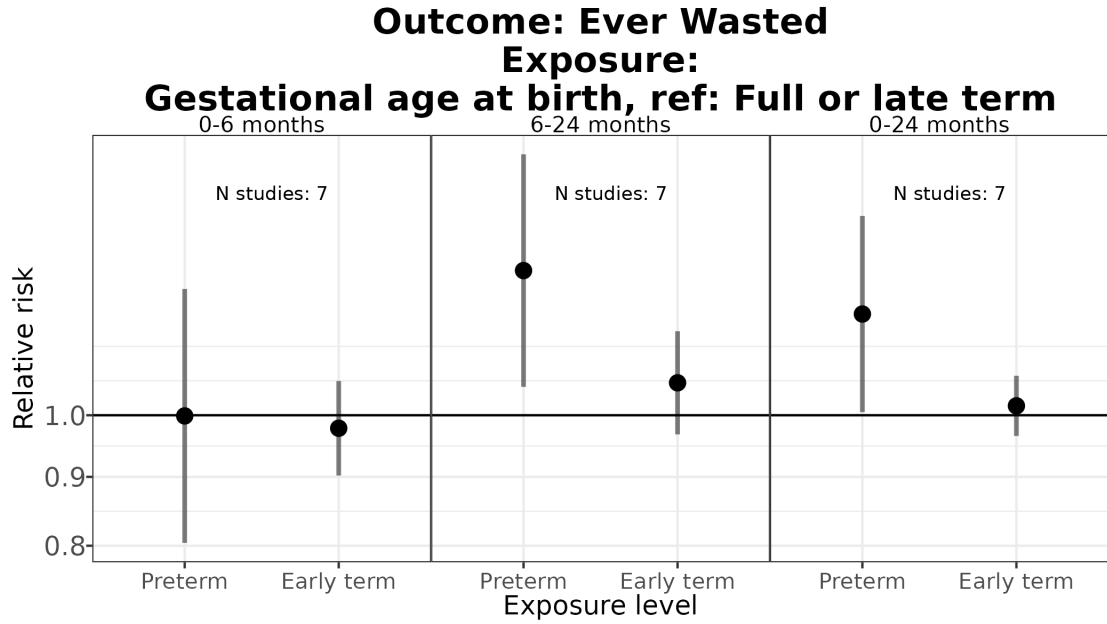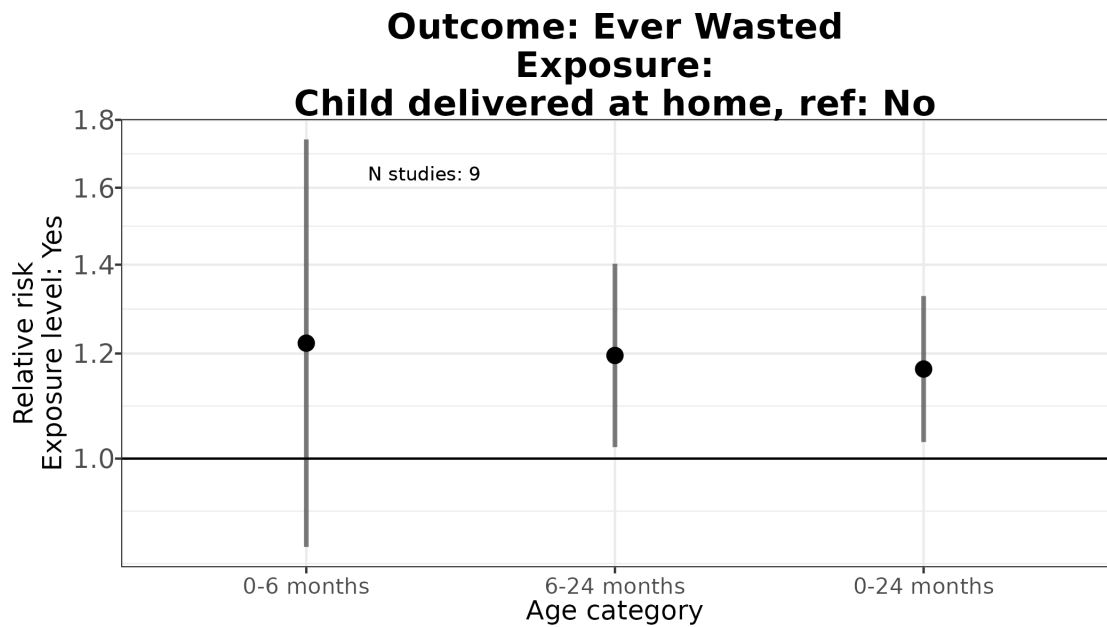



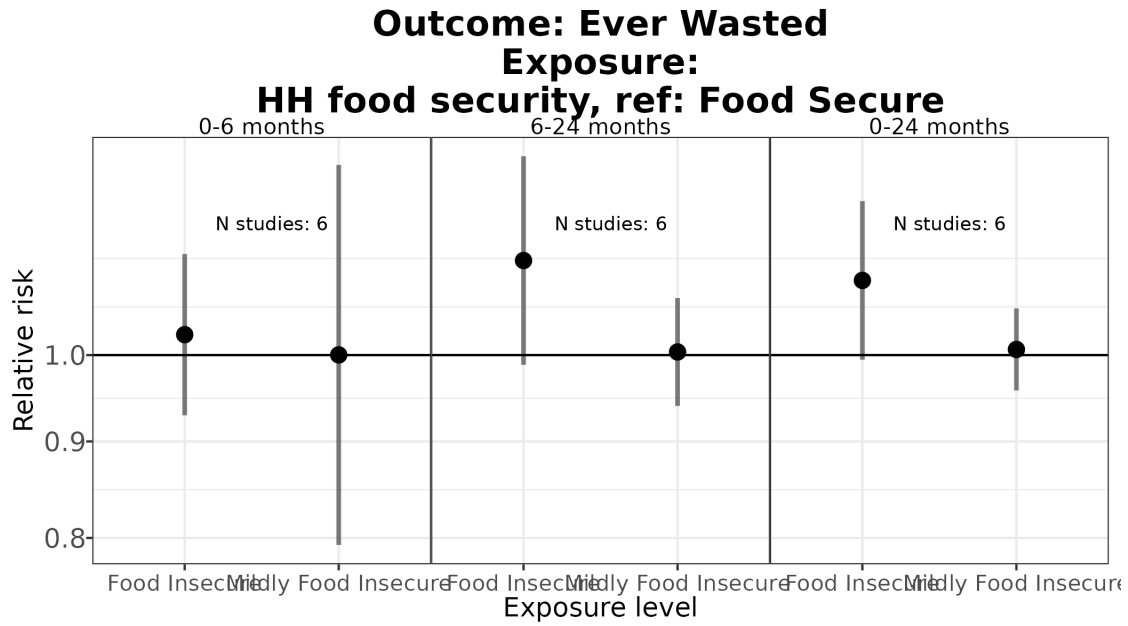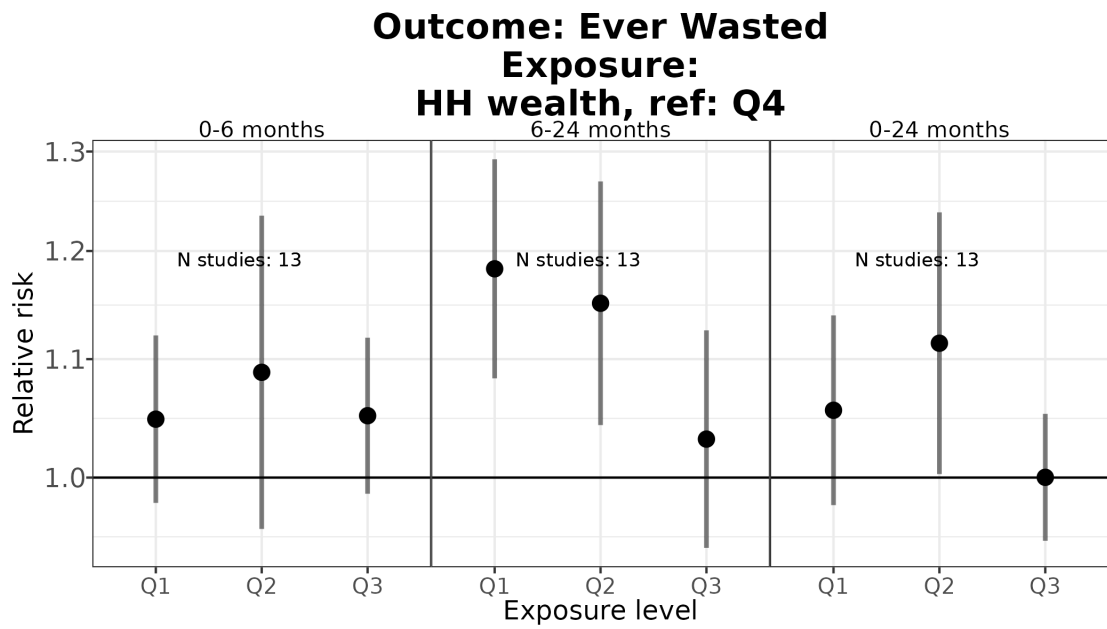

**Outcome: Ever Wasted**  
**Exposure:**  
**Improved floor, ref: Yes**

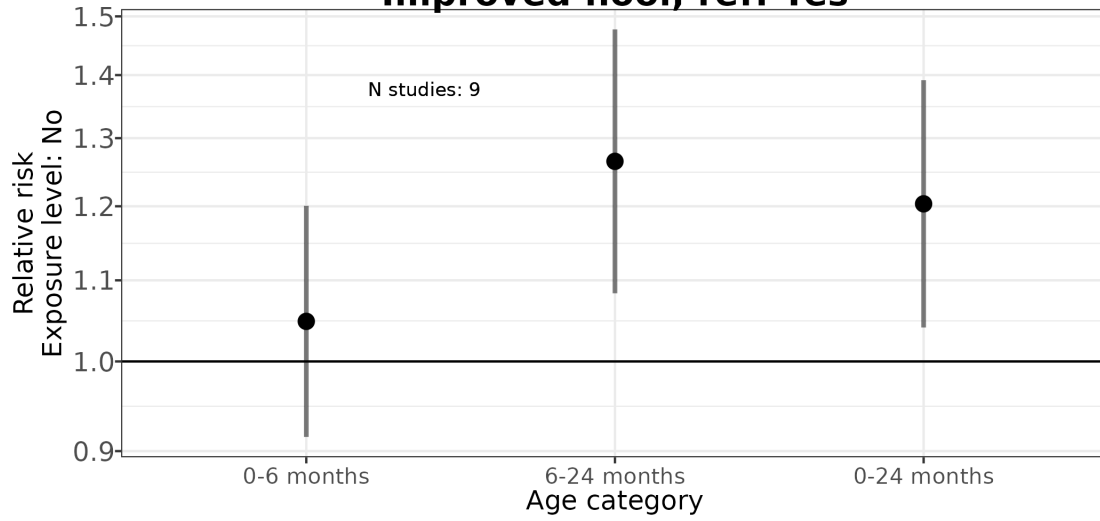

**Outcome: Ever Wasted**  
**Exposure:**  
**Improved sanitation, ref: Yes**

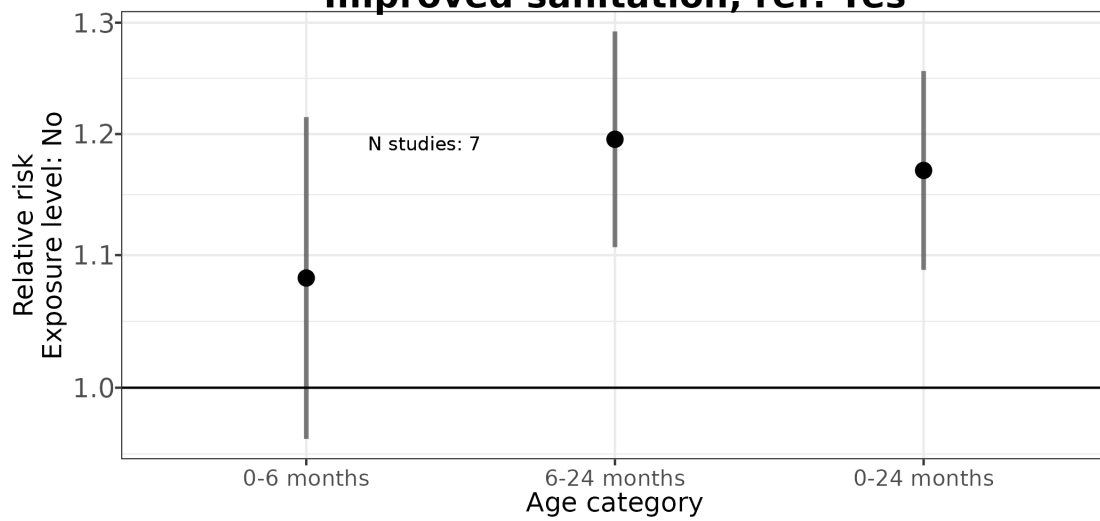

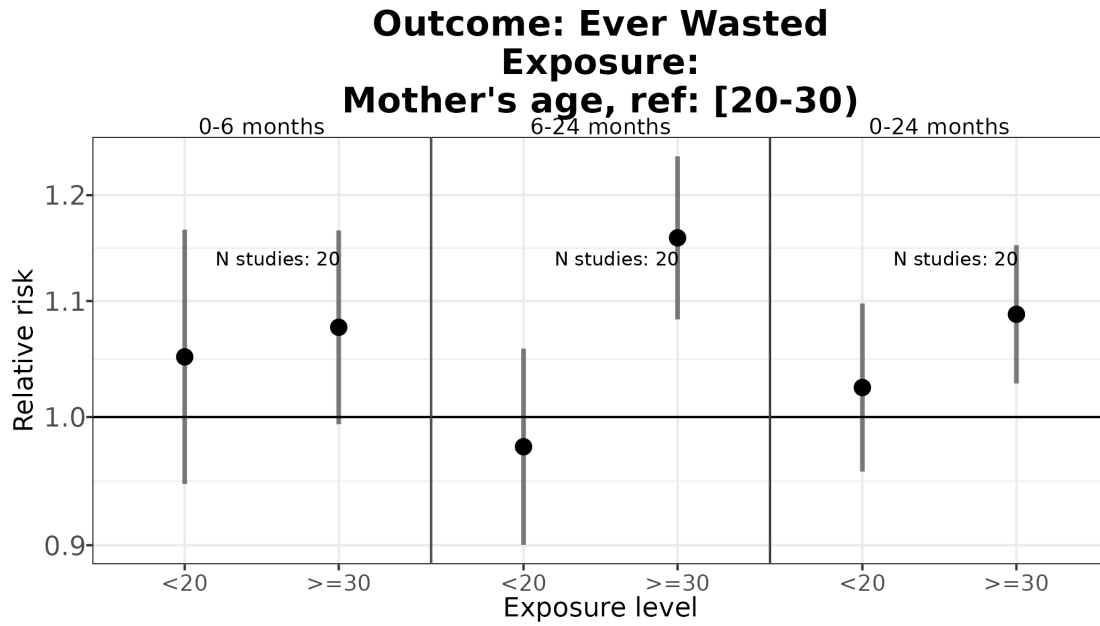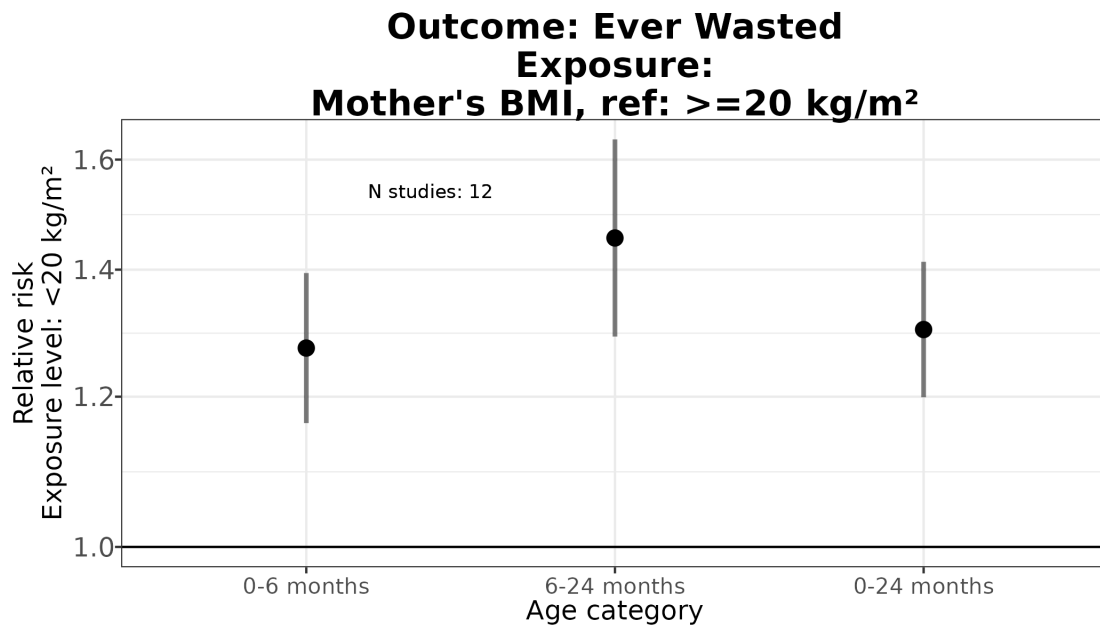

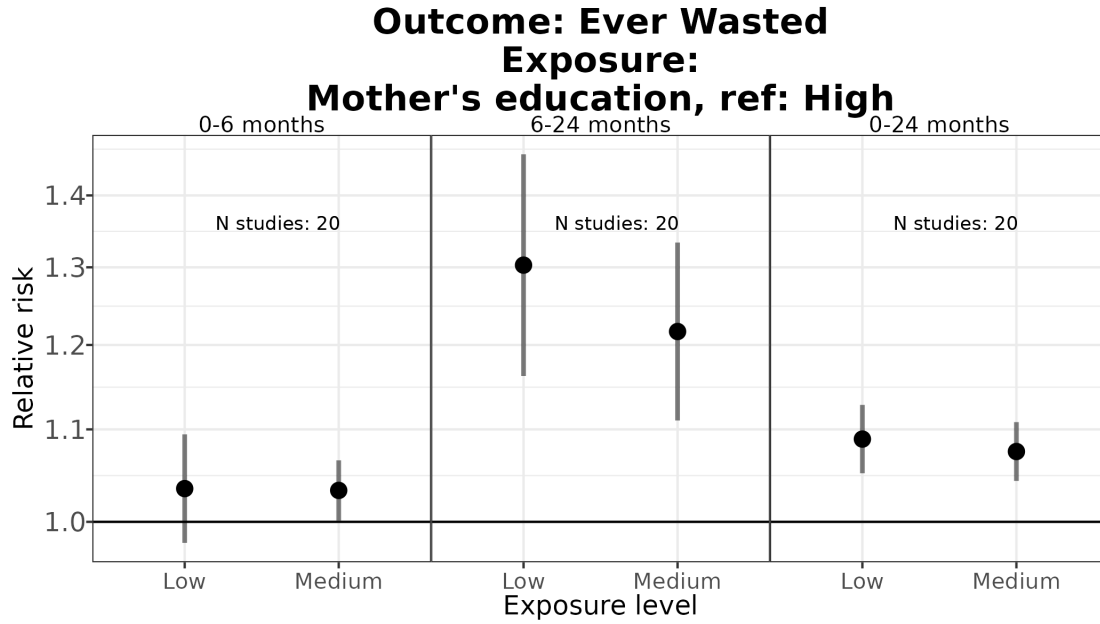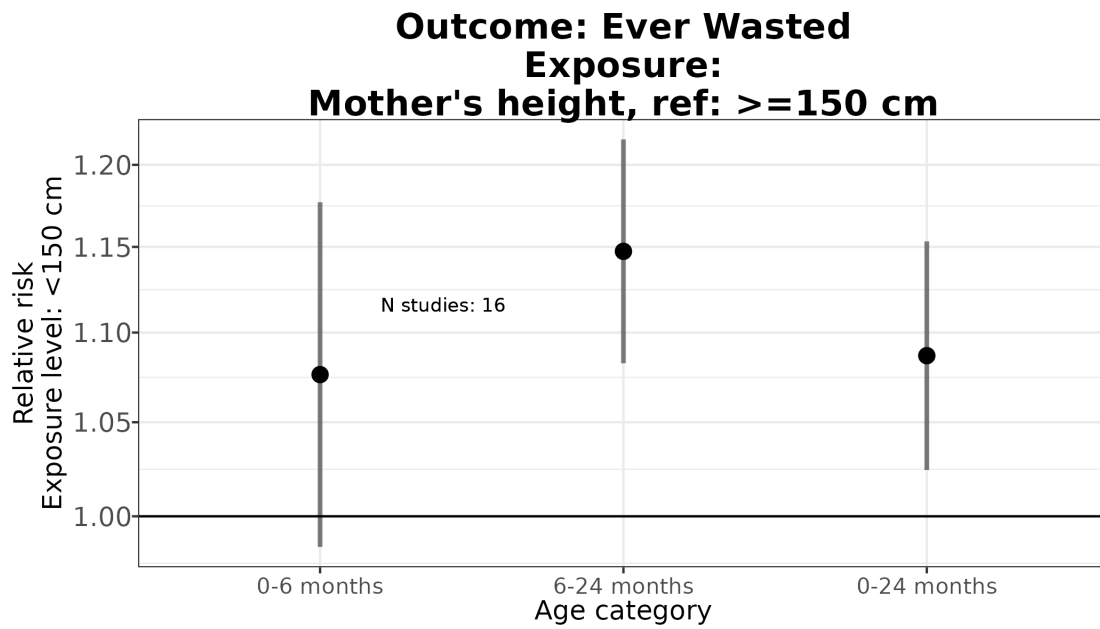

**Outcome: Ever Wasted**  
**Exposure:**  
**Mother's weight, ref:  $\geq 45$  kg**

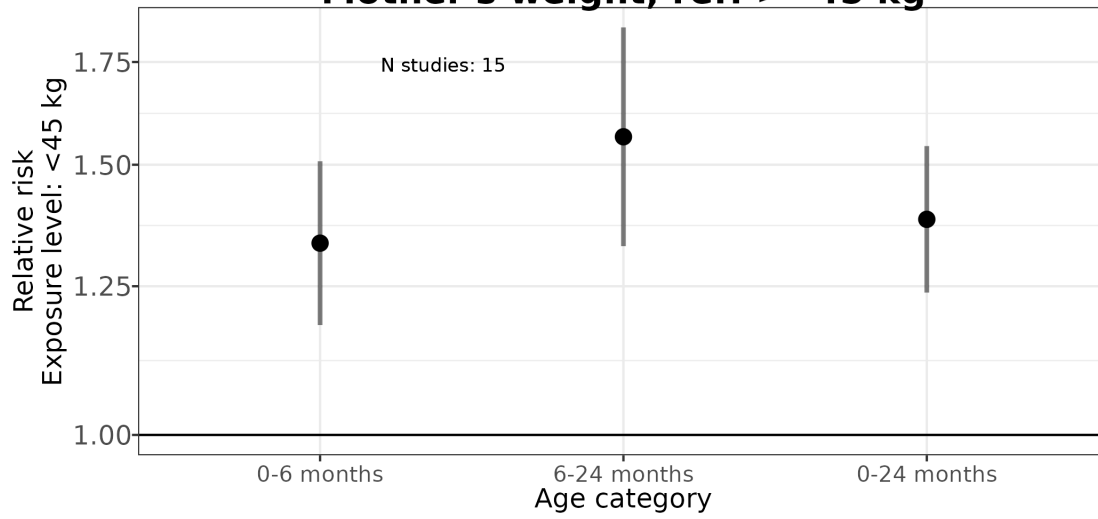

**Outcome: Ever Wasted**  
**Exposure:**  
**# of children <5 in HH, ref: 1**

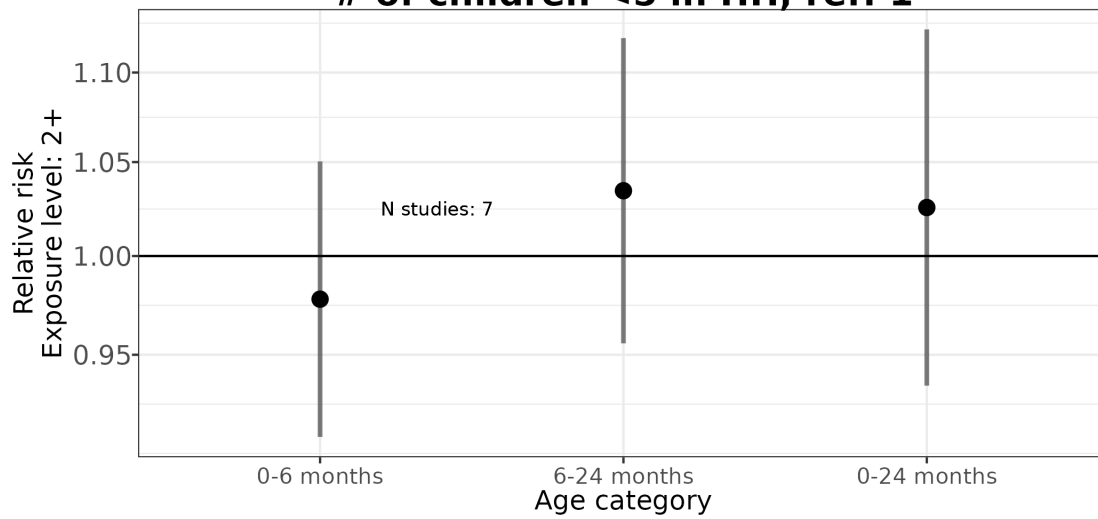

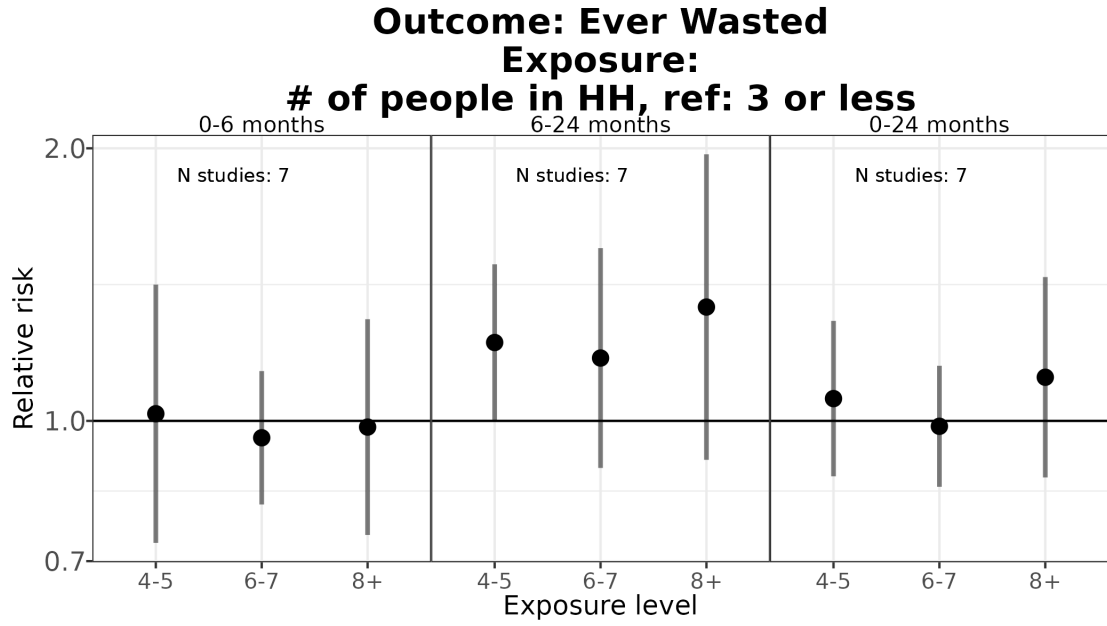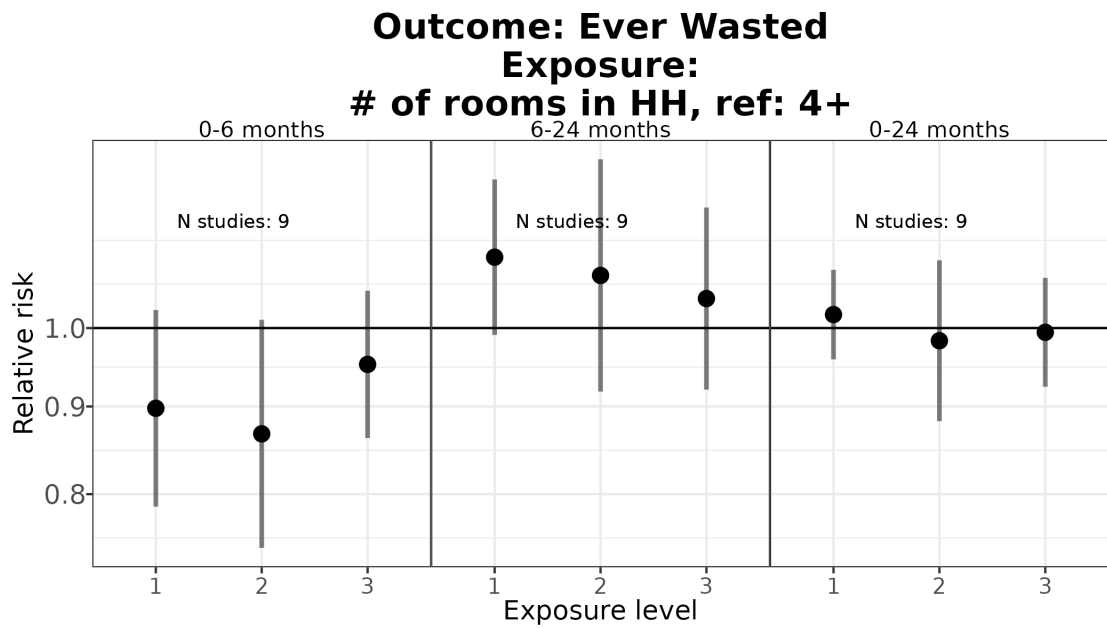

**Outcome: Ever Wasted**  
**Exposure:**  
**Birth order, ref: 1**

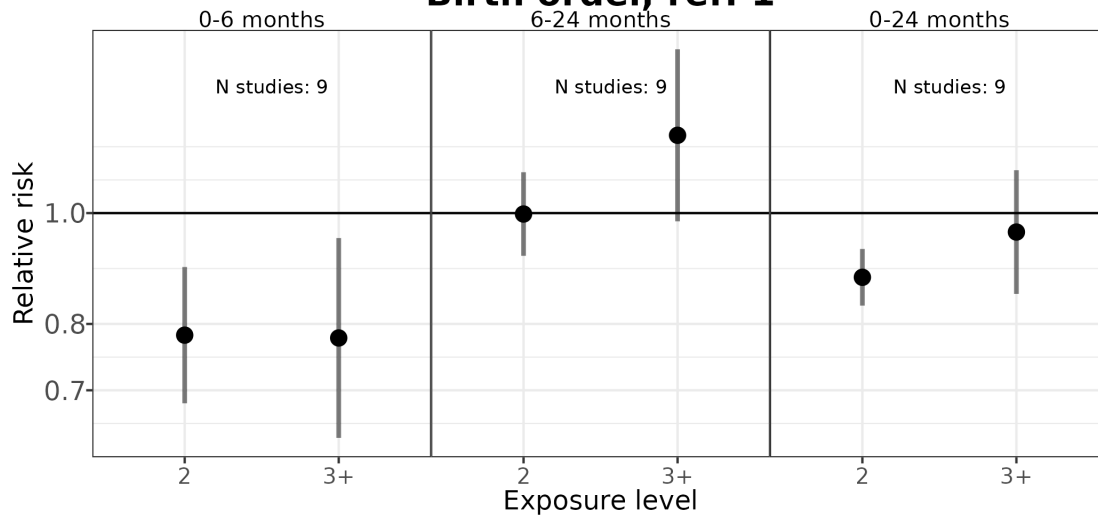

**Outcome: Ever Wasted**  
**Exposure:**  
**Safe water source, ref: Yes**

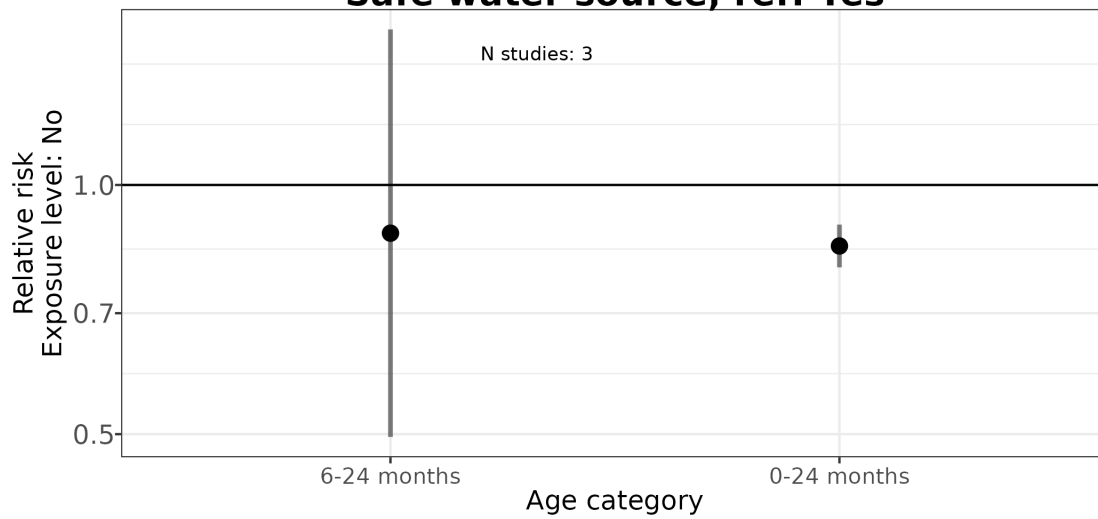

**Outcome: Ever Wasted**  
**Exposure:**  
**Sex, ref: Female**

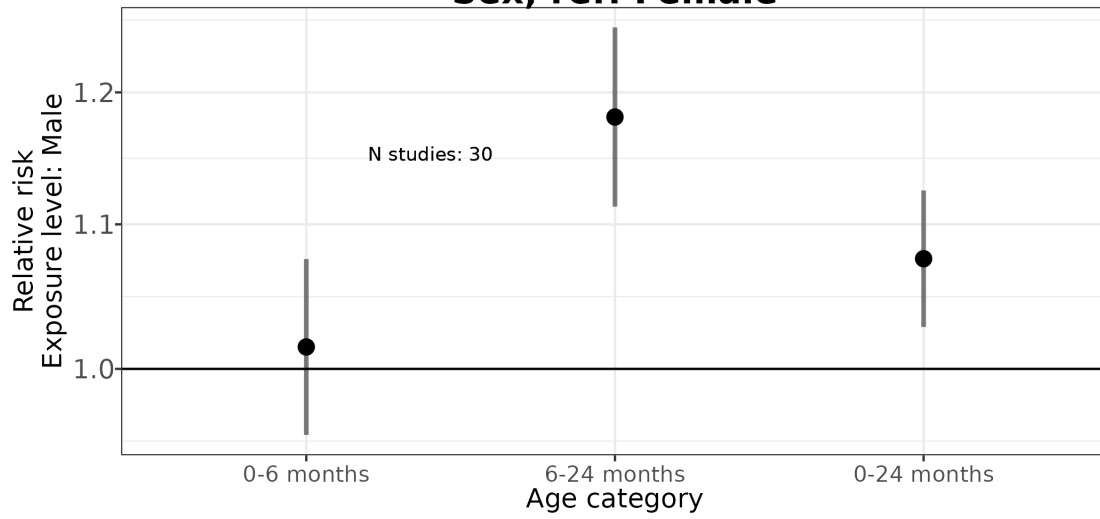

**Outcome: Ever Wasted**  
**Exposure:**  
**Small-for-gestational age, ref: Not SGA**

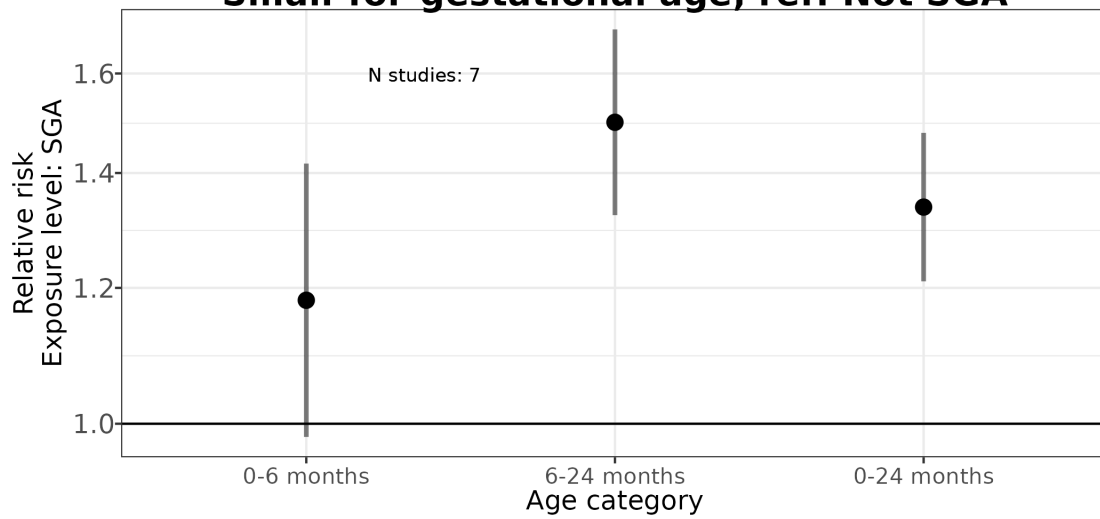



**Outcome: Ever Wasted**  
**Exposure:**  
**Single parent, ref: 0**

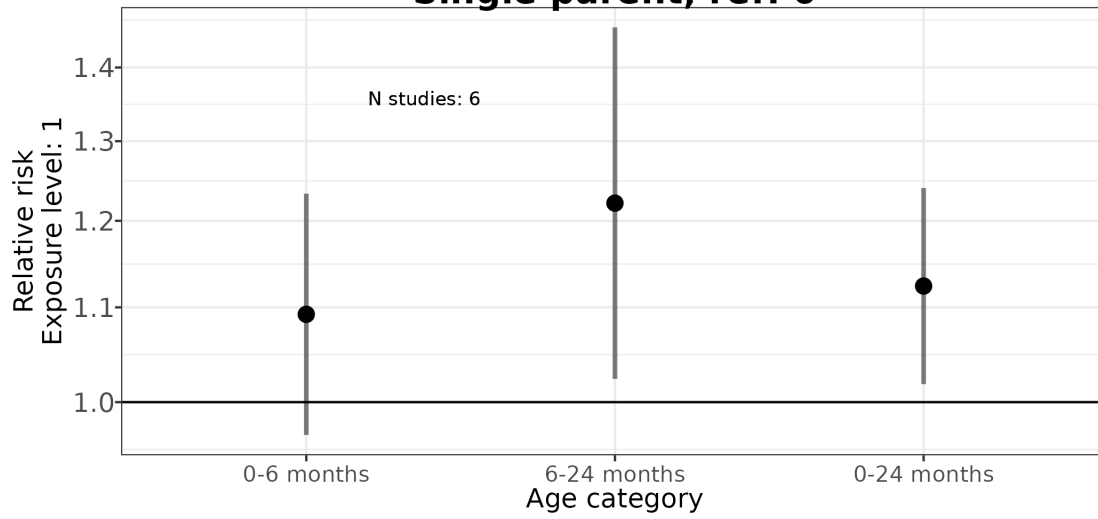

**Outcome: Ever Wasted and Stunted**  
**Exposure:**  
**Birth length (cm), ref:  $\geq 50$  cm**

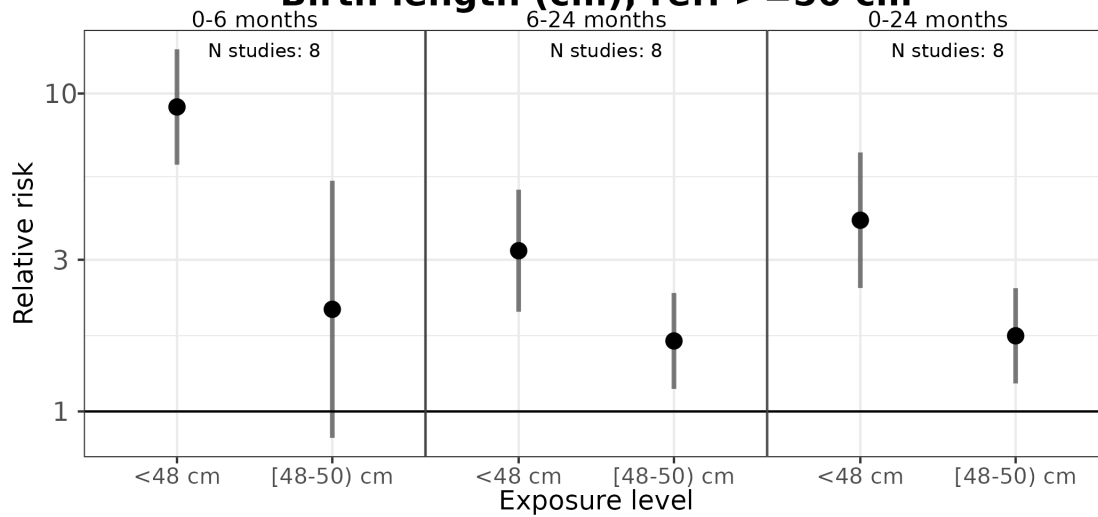

**Outcome: Ever Wasted and Stunted**  
**Exposure:**  
**Birthweight (kg), ref:  $\geq 2500$  g**

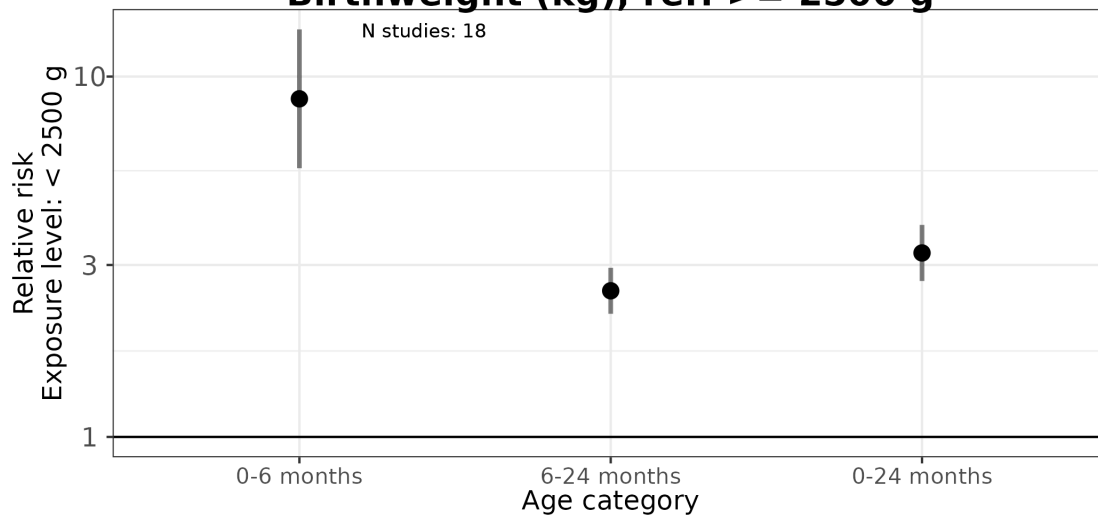

**Outcome: Ever Wasted and Stunted**  
**Exposure:**  
**Clean cooking fuel usage, ref: Yes**

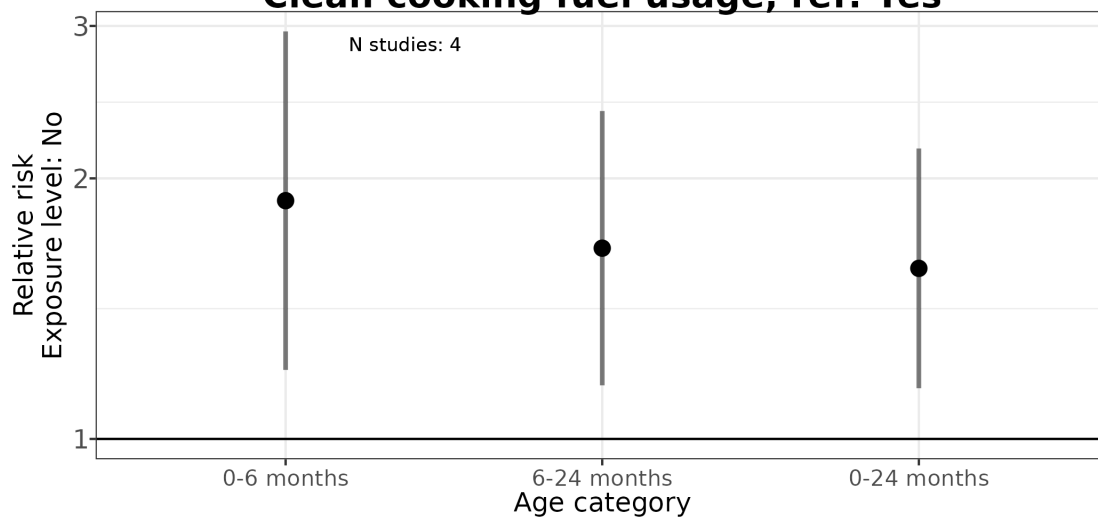

**Outcome: Ever Wasted and Stunted**  
**Exposure:**  
**Breastfed hour after birth, ref: Yes**

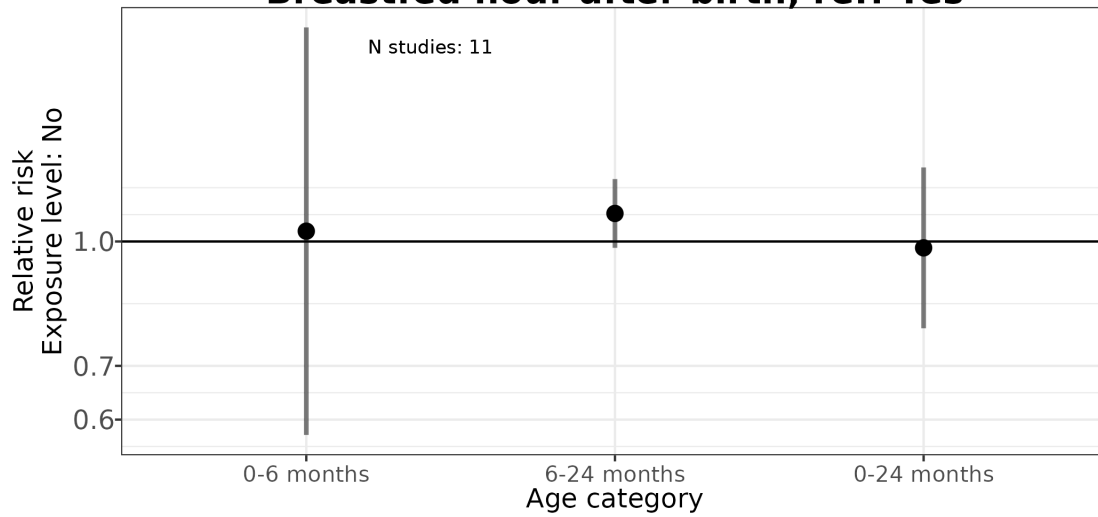

**Outcome: Ever Wasted and Stunted**  
**Exposure:**  
**Father's age, ref:  $\geq 35$**

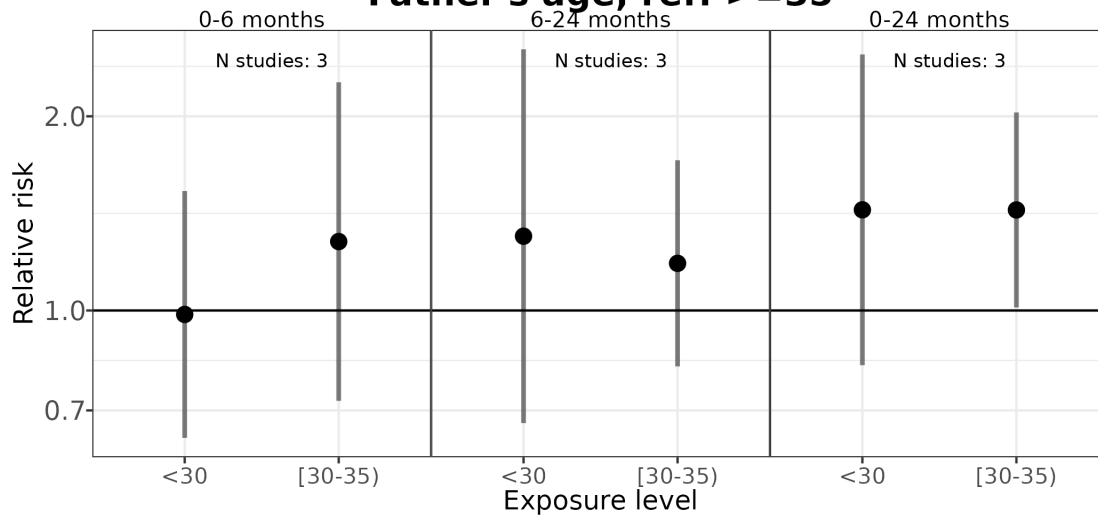

**Outcome: Ever Wasted and Stunted**  
**Exposure:**  
**Father's education, ref: High**

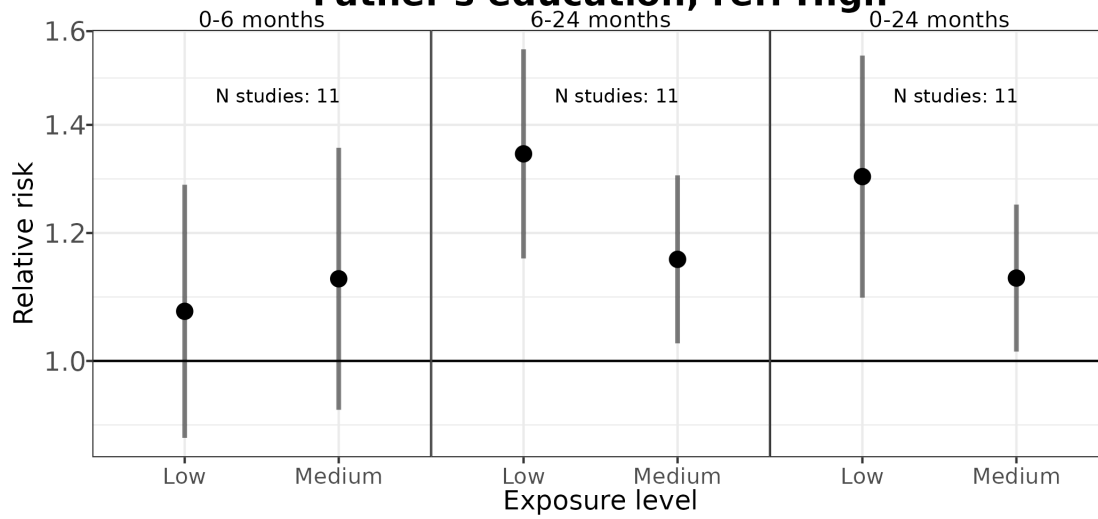

**Outcome: Ever Wasted and Stunted**  
**Exposure:**  
**Father's height, ref:  $\geq 162$  cm**

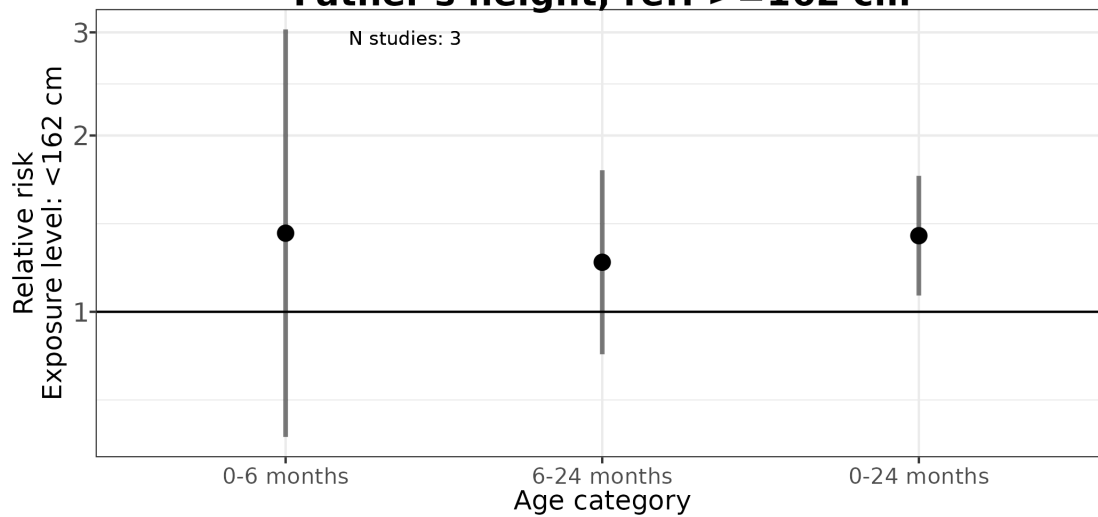

**Outcome: Ever Wasted and Stunted**  
**Exposure:**  
**Gestational age at birth, ref: Full or late term**

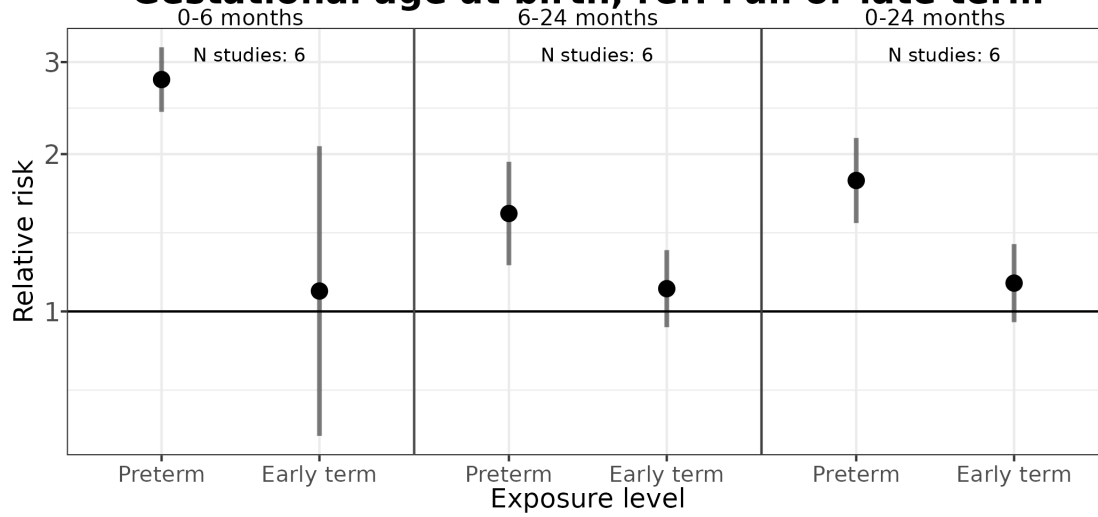

**Outcome: Ever Wasted and Stunted**  
**Exposure:**  
**Child delivered at home, ref: No**

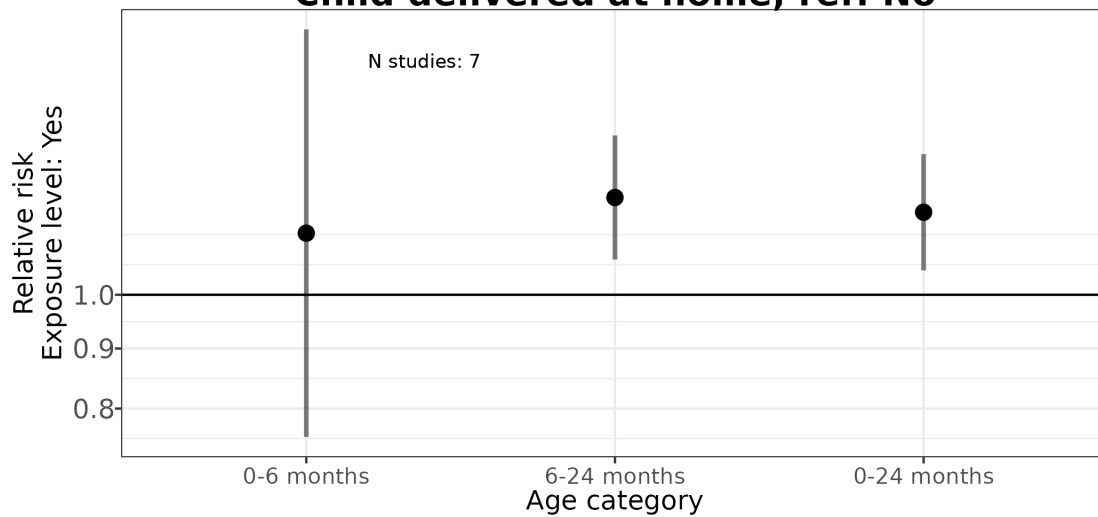

**Outcome: Ever Wasted and Stunted**  
**Exposure:**  
**HH food security, ref: Food Secure**

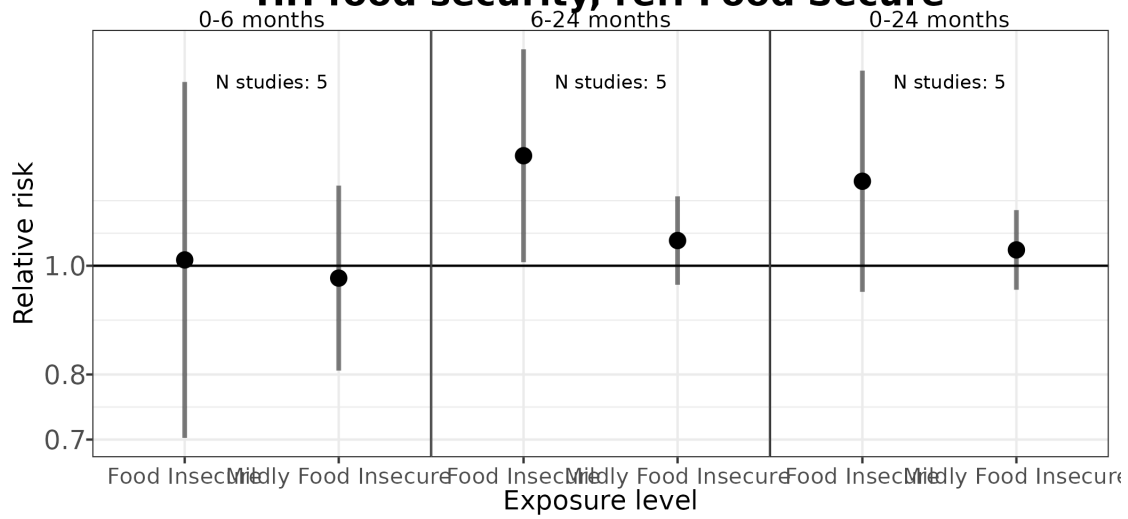

**Outcome: Ever Wasted and Stunted**  
**Exposure:**  
**HH wealth, ref: Q4**

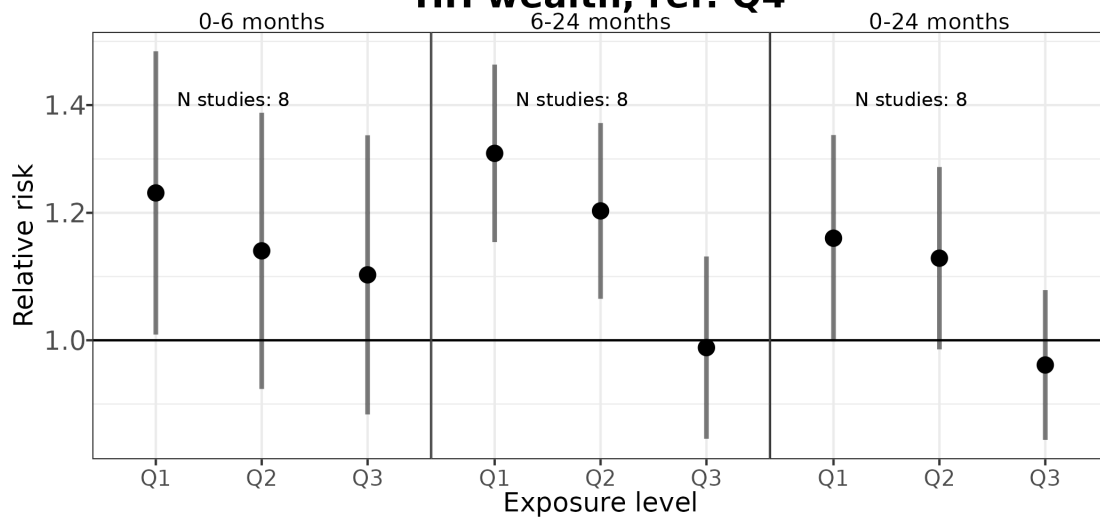

**Outcome: Ever Wasted and Stunted**  
**Exposure: Improved floor, ref: Yes**

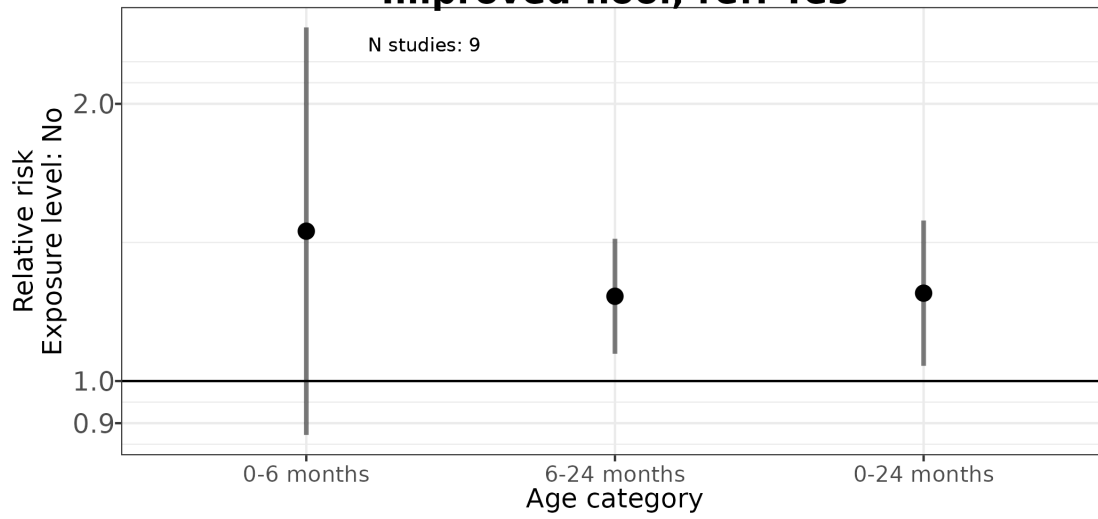

**Outcome: Ever Wasted and Stunted**  
**Exposure: Improved sanitation, ref: Yes**

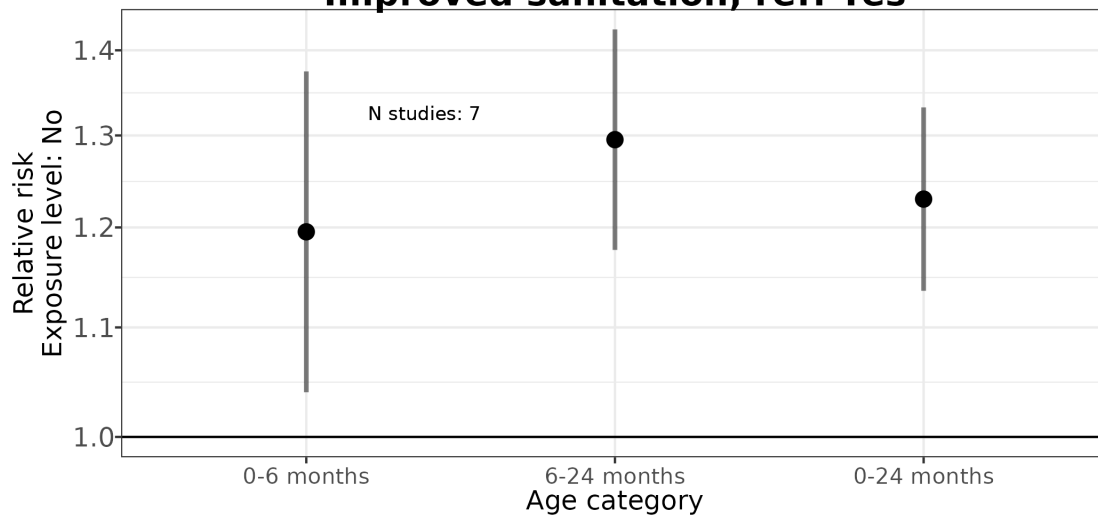

**Outcome: Ever Wasted and Stunted**  
**Exposure:**  
**Mother's age, ref: [20-30)**

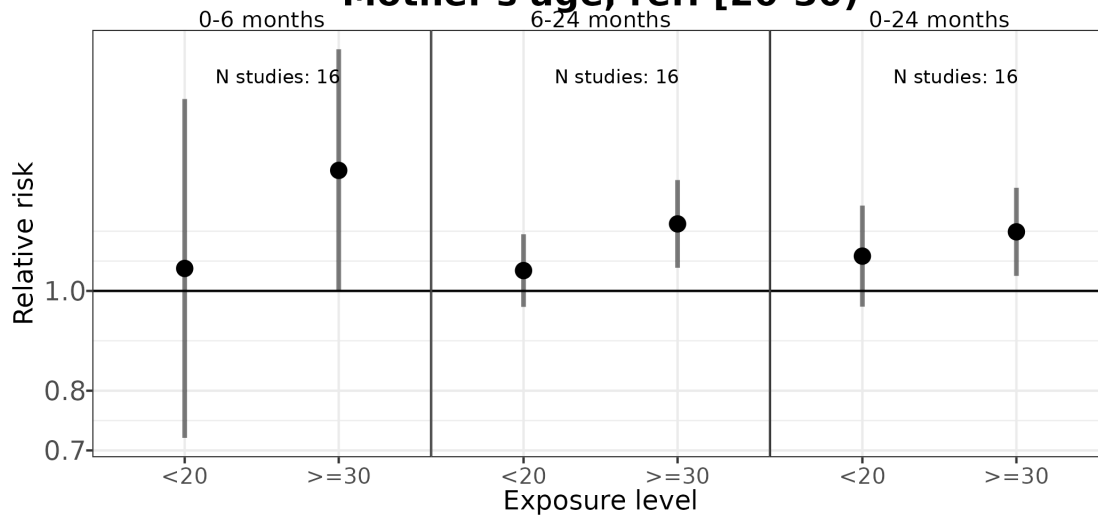

**Outcome: Ever Wasted and Stunted**  
**Exposure:**  
**Mother's BMI, ref: ≥20 kg/m<sup>2</sup>**

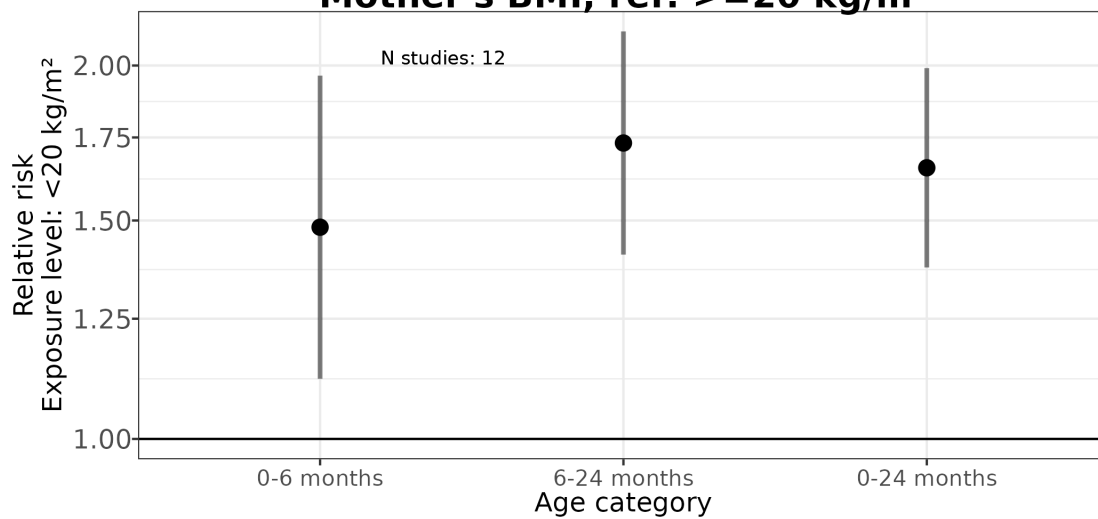



**Outcome: Ever Wasted and Stunted**  
**Exposure:**  
**Mother's education, ref: High**

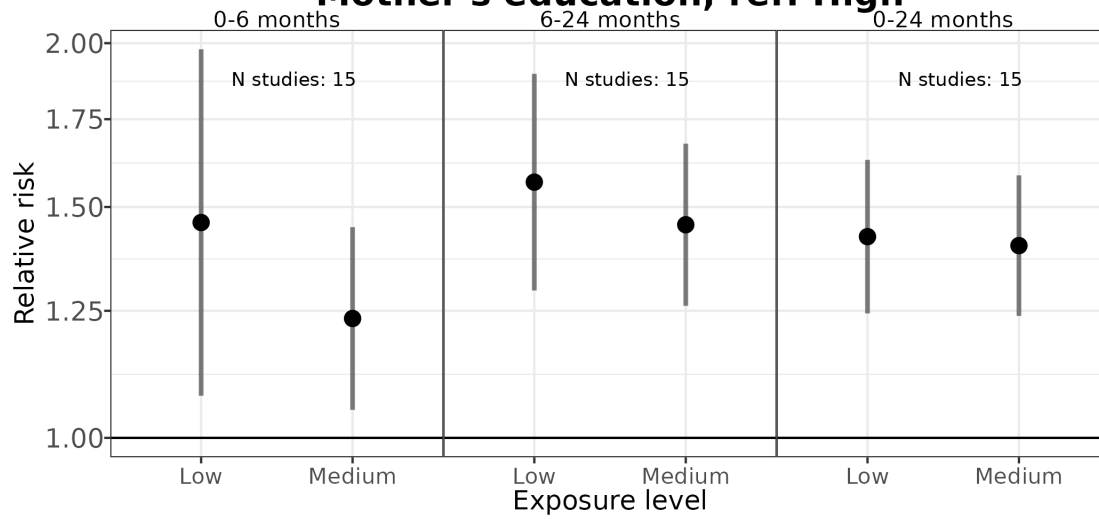

**Outcome: Ever Wasted and Stunted**  
**Exposure:**  
**Mother's height, ref:  $\geq 150$  cm**

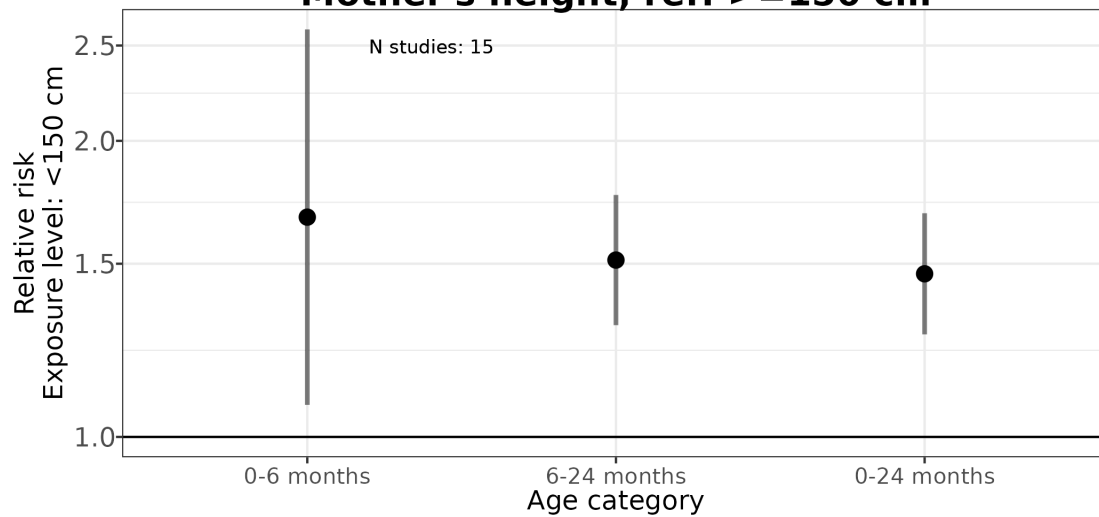

**Outcome: Ever Wasted and Stunted**  
**Exposure:**  
**Mother's weight, ref:  $\geq 45$  kg**

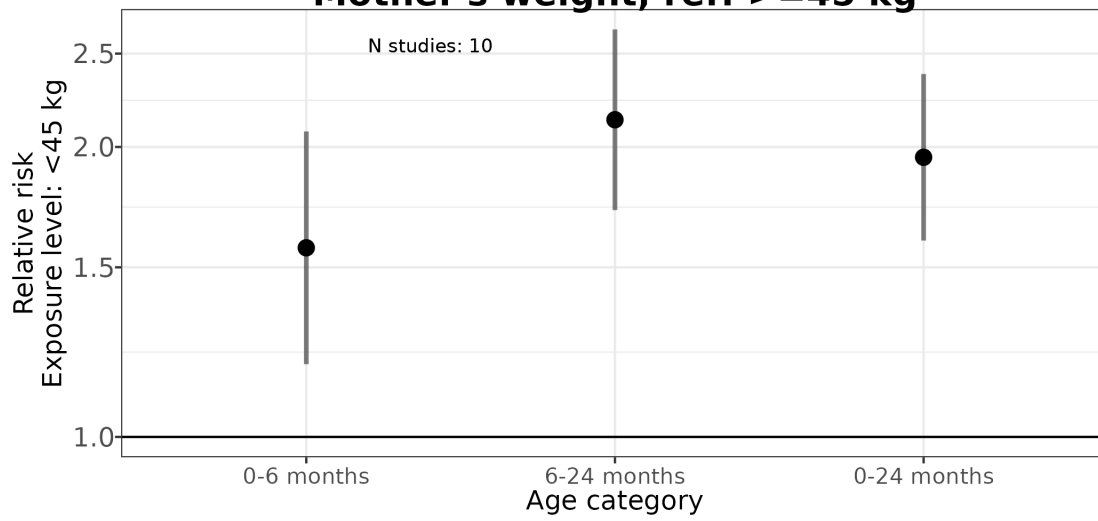

**Outcome: Ever Wasted and Stunted**  
**Exposure:**  
**# of children  $<5$  in HH, ref: 1**

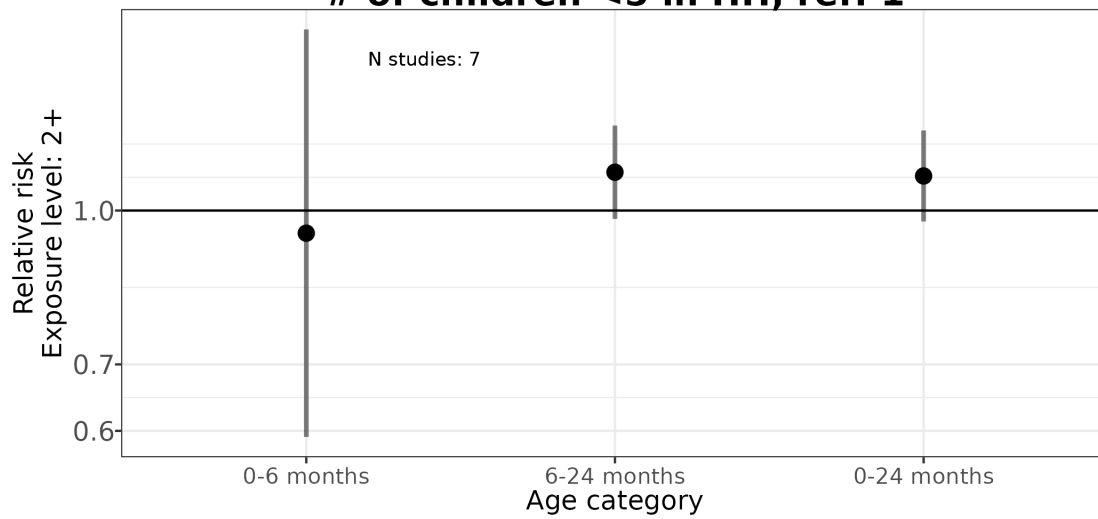

**Outcome: Ever Wasted and Stunted**

**Exposure:**

**# of people in HH, ref: 3 or less**

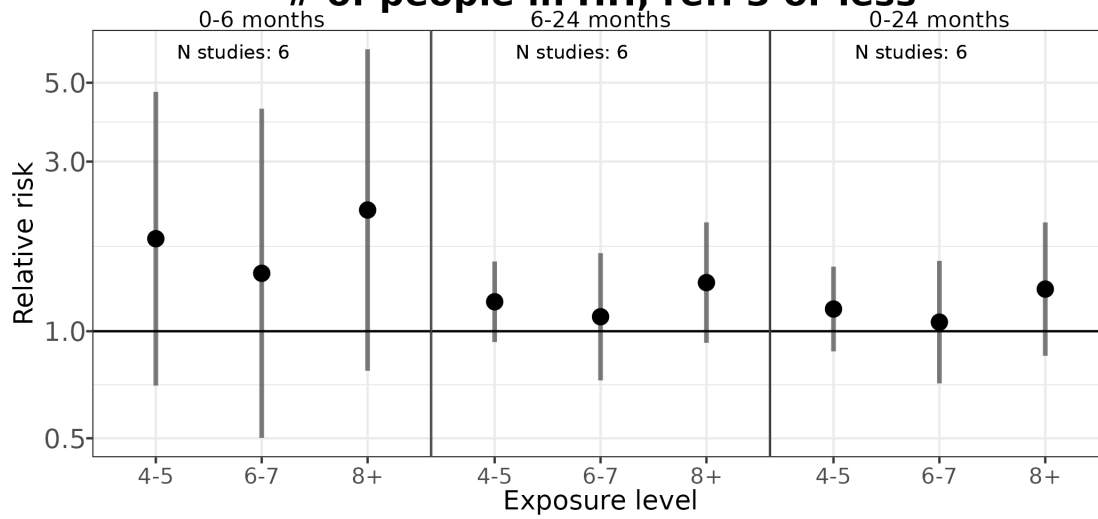

**Outcome: Ever Wasted and Stunted**

**Exposure:**

**# of rooms in HH, ref: 4+**

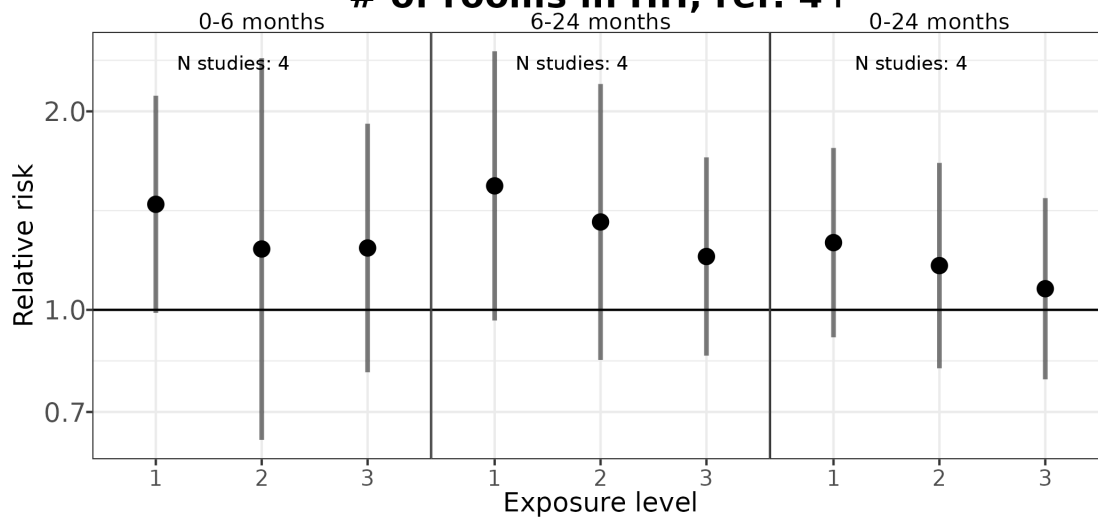

**Outcome: Ever Wasted and Stunted**  
**Exposure:**  
**Birth order, ref: 1**

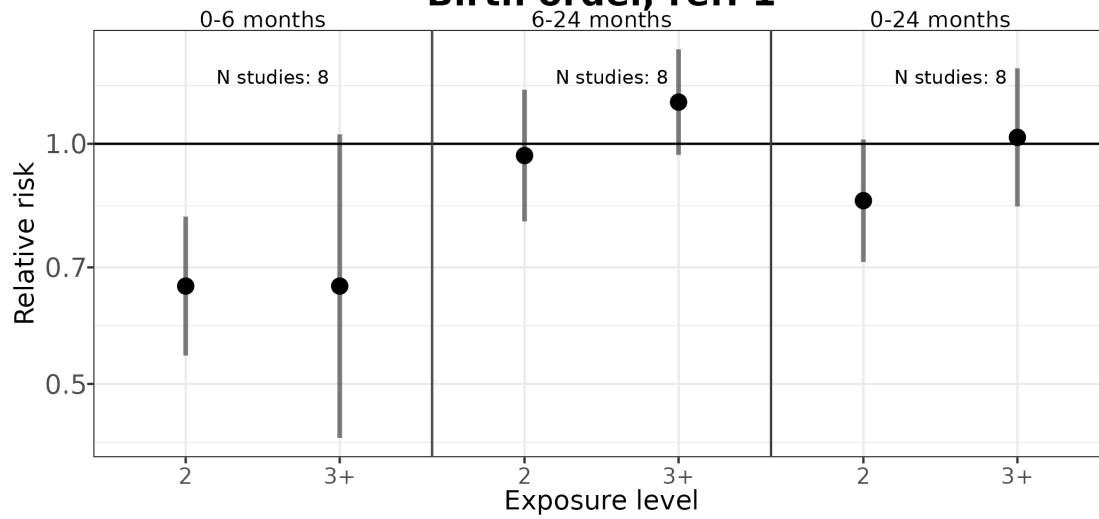

**Outcome: Ever Wasted and Stunted**  
**Exposure:**  
**Safe water source, ref: Yes**

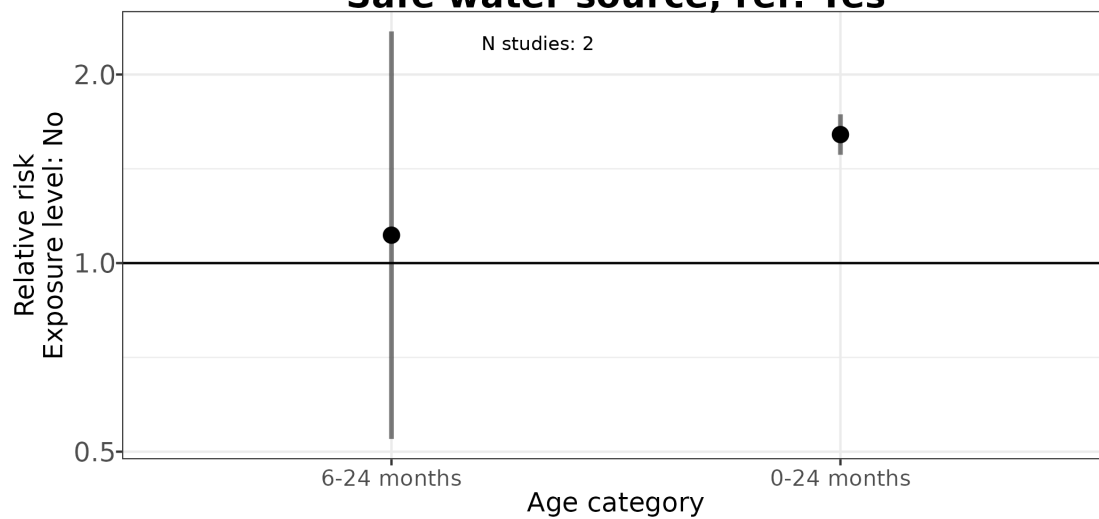

**Outcome: Ever Wasted and Stunted**  
**Exposure:**  
**Sex, ref: Female**

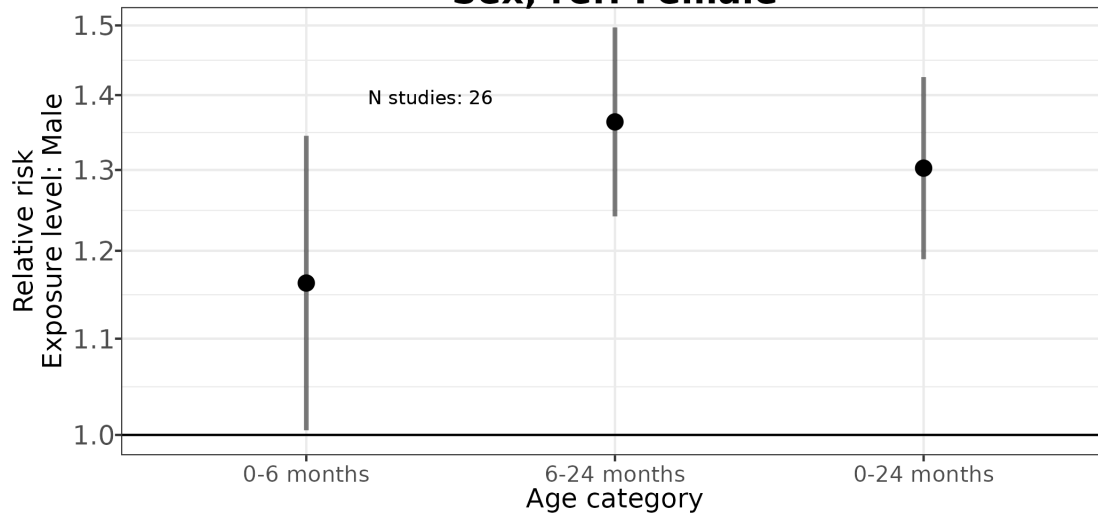

**Outcome: Ever Wasted and Stunted**  
**Exposure:**  
**Small-for-gestational age, ref: Not SGA**

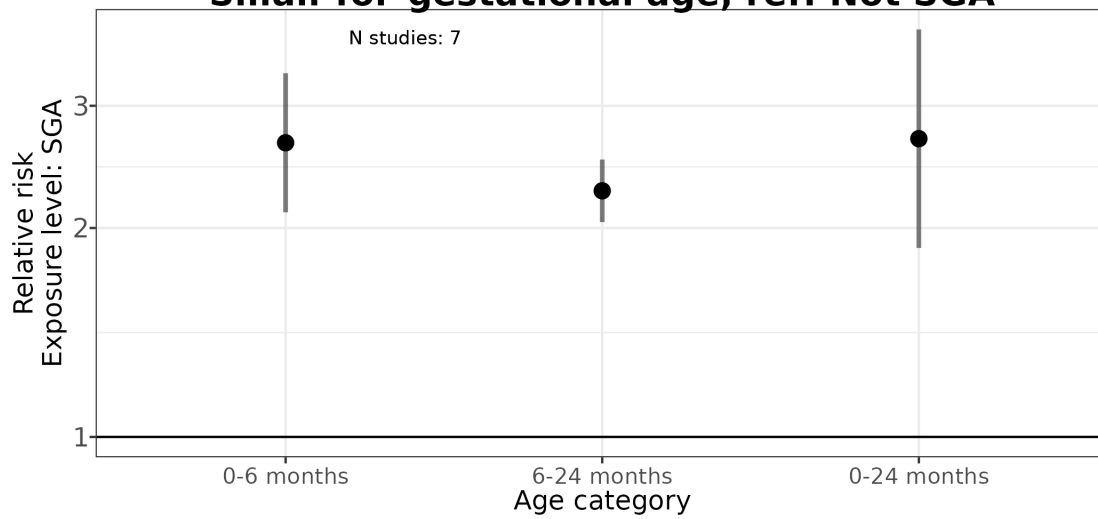

**Outcome: Ever Wasted and Stunted**  
**Exposure: Single parent, ref: 0**

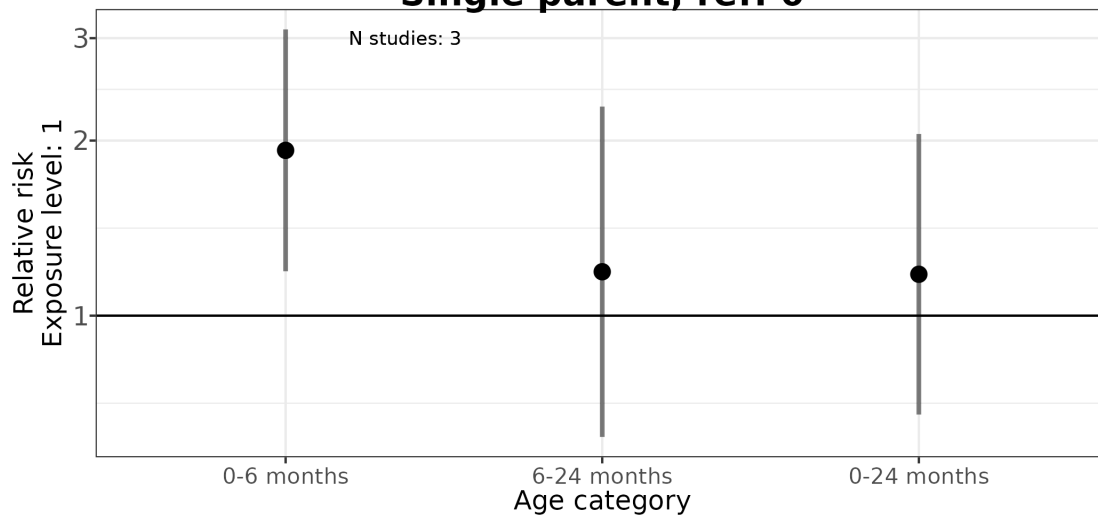

**Outcome: Persistently Wasted**  
**Exposure: Birth length (cm), ref:  $\geq 50$  cm**

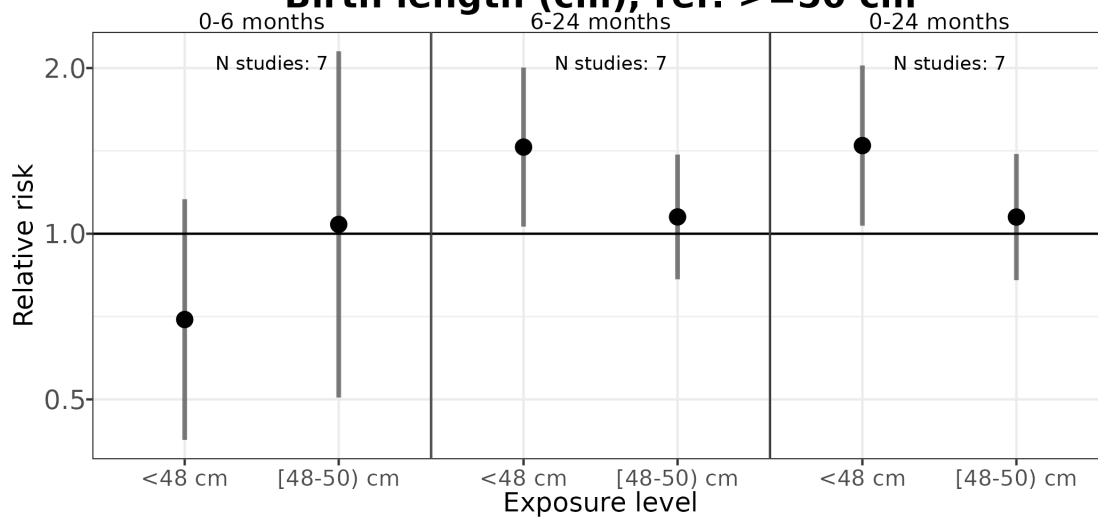

**Outcome: Persistently Wasted**  
**Exposure:**  
**Birthweight (kg), ref:  $\geq 2500$  g**

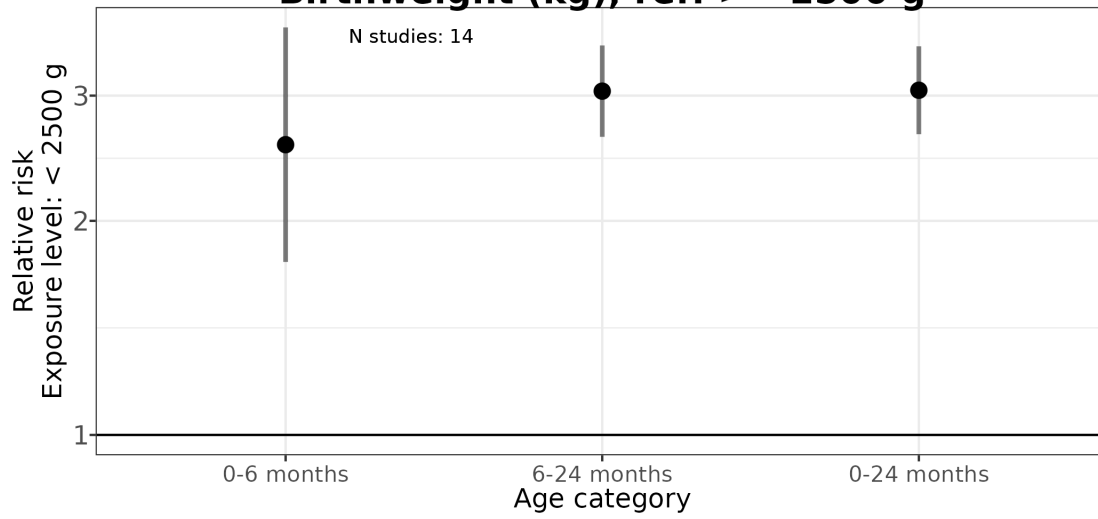

**Outcome: Persistently Wasted**  
**Exposure:**  
**Clean cooking fuel usage, ref: Yes**

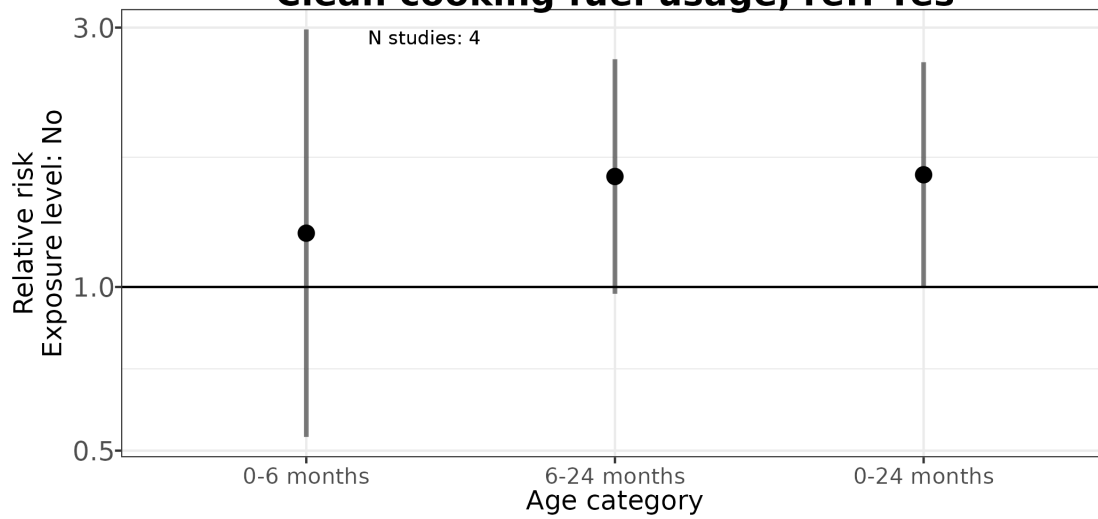

**Outcome: Persistently Wasted**  
**Exposure:**  
**Breastfed hour after birth, ref: Yes**

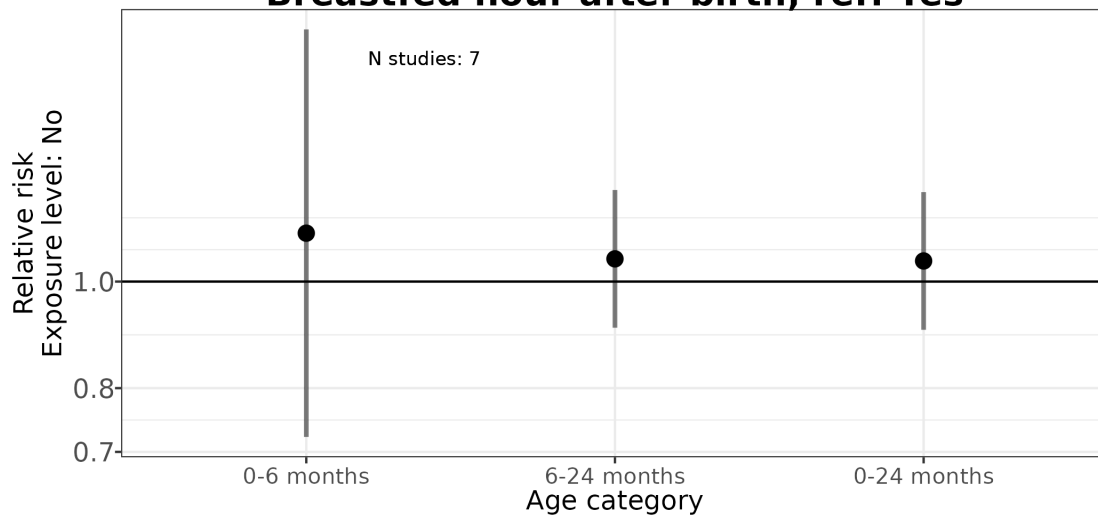

**Outcome: Persistently Wasted**  
**Exposure:**  
**Father's age, ref: >=35**

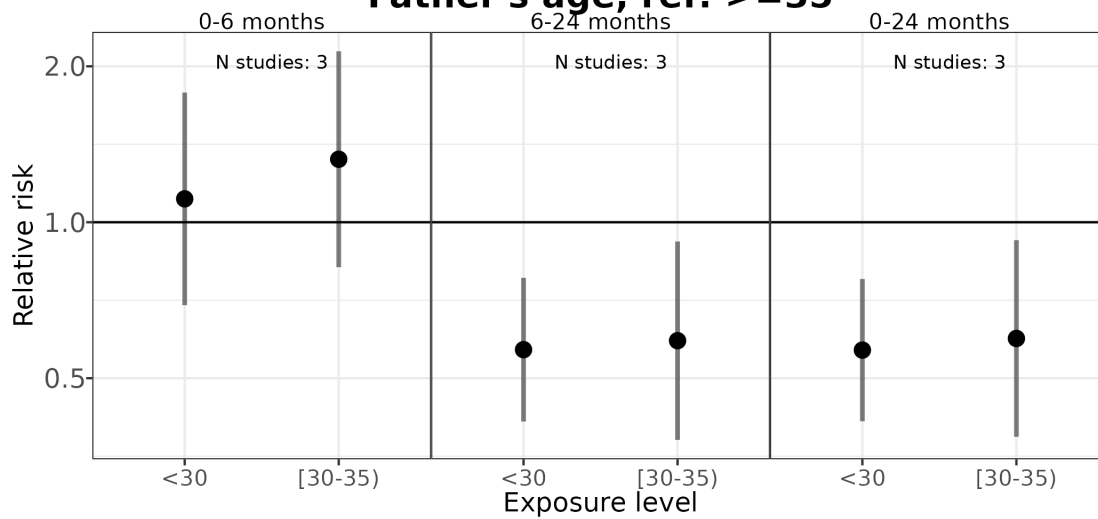



**Outcome: Persistently Wasted**  
**Exposure:**  
**Father's education, ref: High**

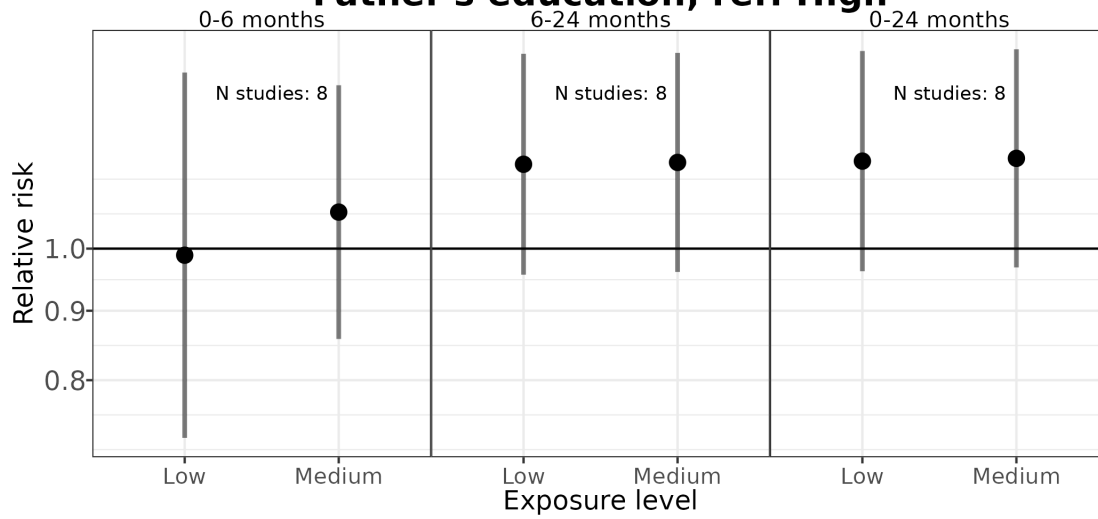

**Outcome: Persistently Wasted**  
**Exposure:**  
**Father's height, ref:  $\geq 162$  cm**

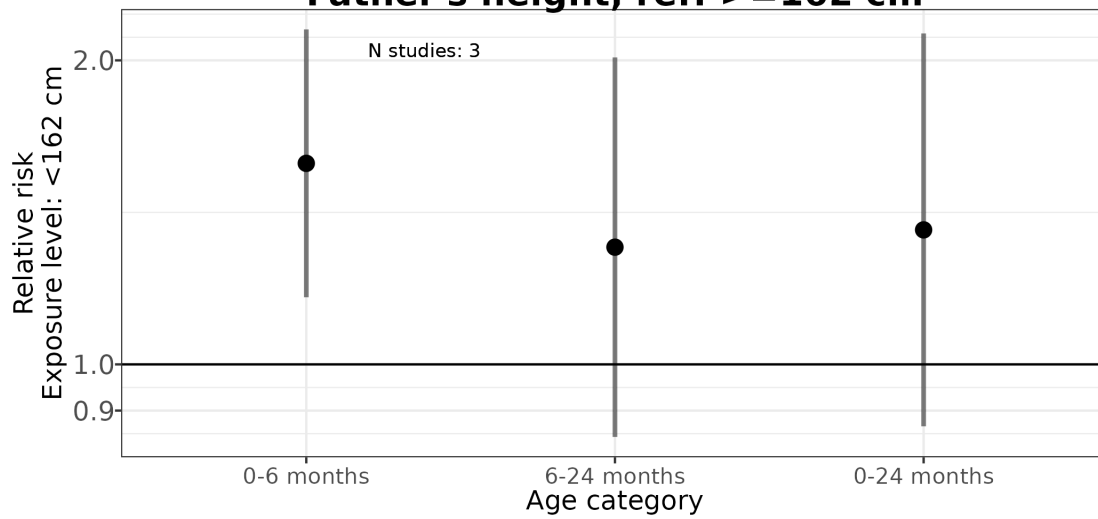

**Outcome: Persistently Wasted**  
**Exposure:**  
**Gestational age at birth, ref: Full or late term**

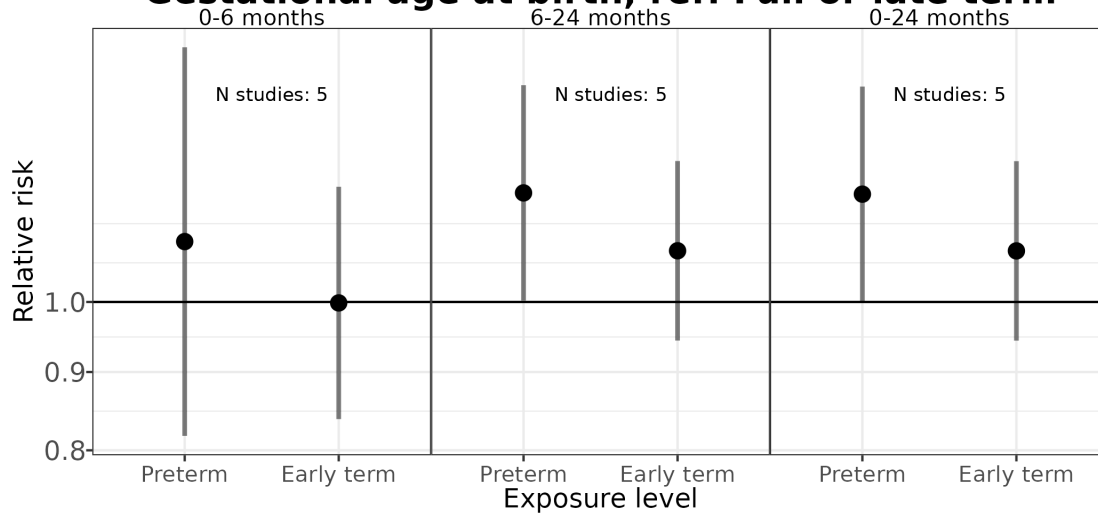

**Outcome: Persistently Wasted**  
**Exposure:**  
**Child delivered at home, ref: No**

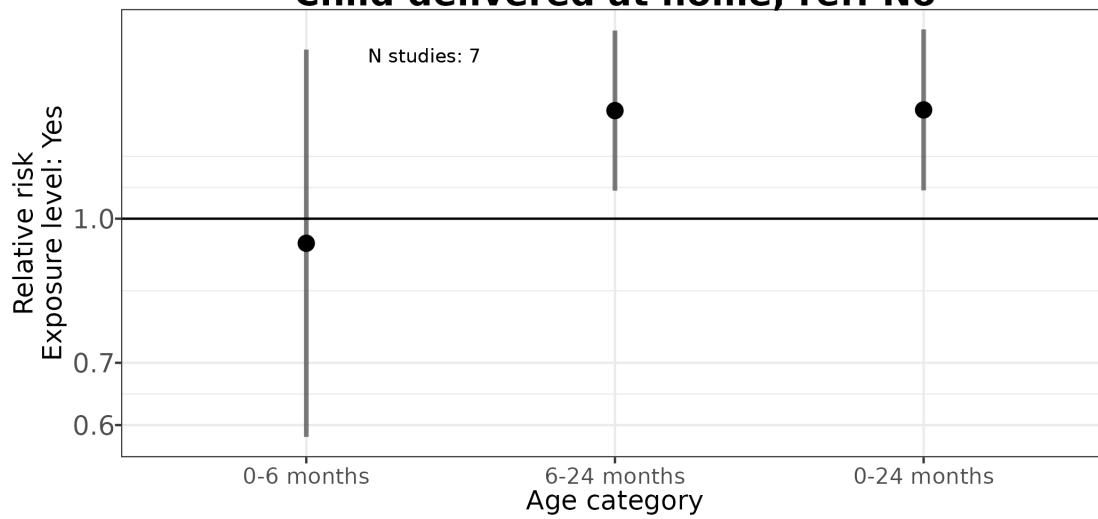

**Outcome: Persistently Wasted**  
**Exposure:**  
**HH food security, ref: Food Secure**

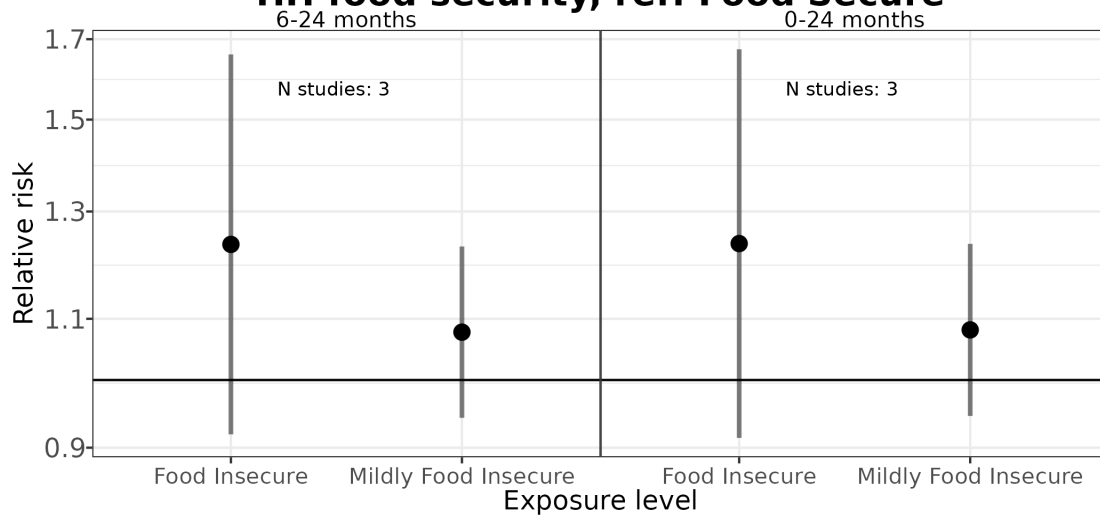

**Outcome: Persistently Wasted**  
**Exposure:**  
**HH wealth, ref: Q4**

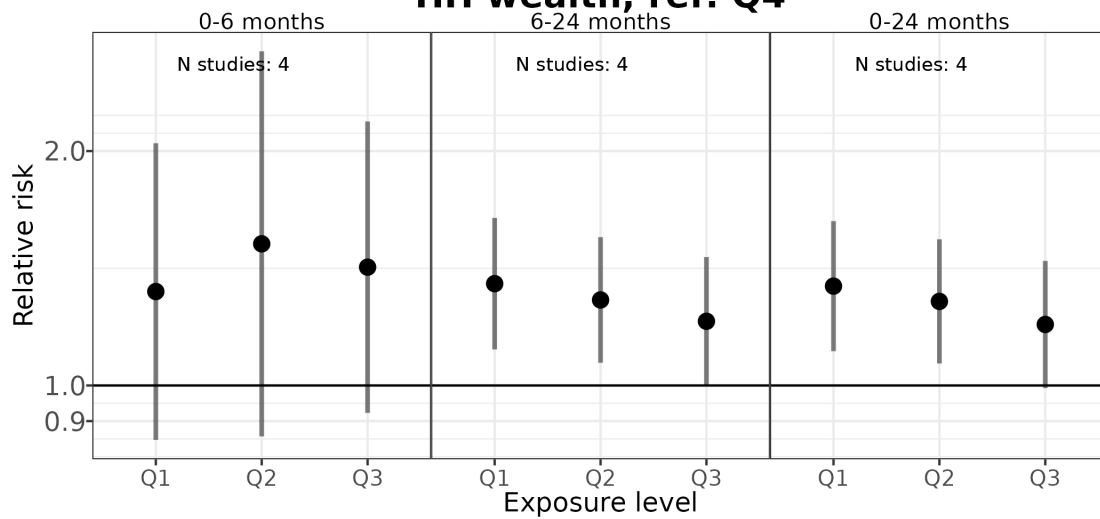

**Outcome: Persistently Wasted**  
**Exposure: Improved floor, ref: Yes**

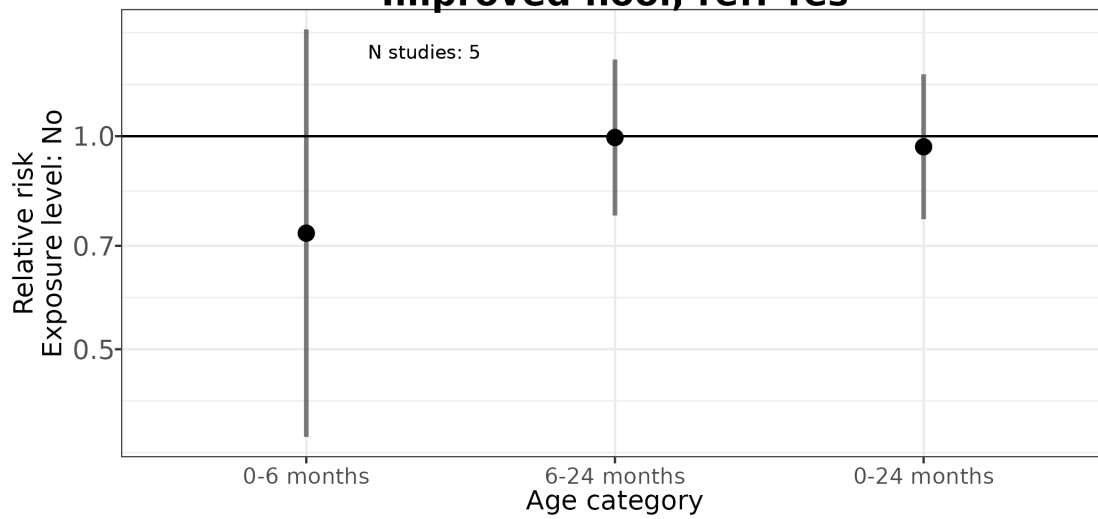

**Outcome: Persistently Wasted**  
**Exposure: Improved sanitation, ref: Yes**

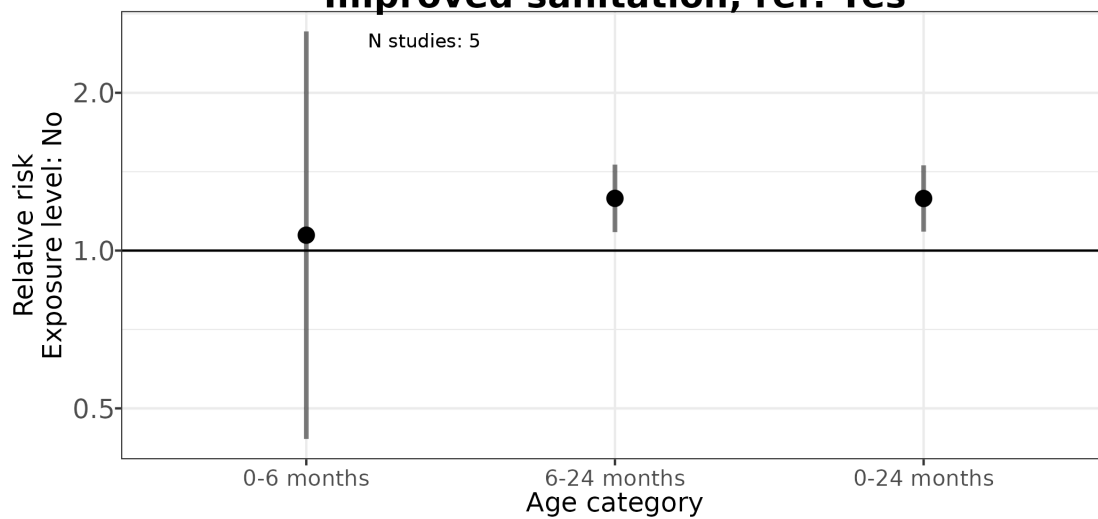

**Outcome: Persistently Wasted**  
**Exposure:**  
**Mother's age, ref: [20-30)**

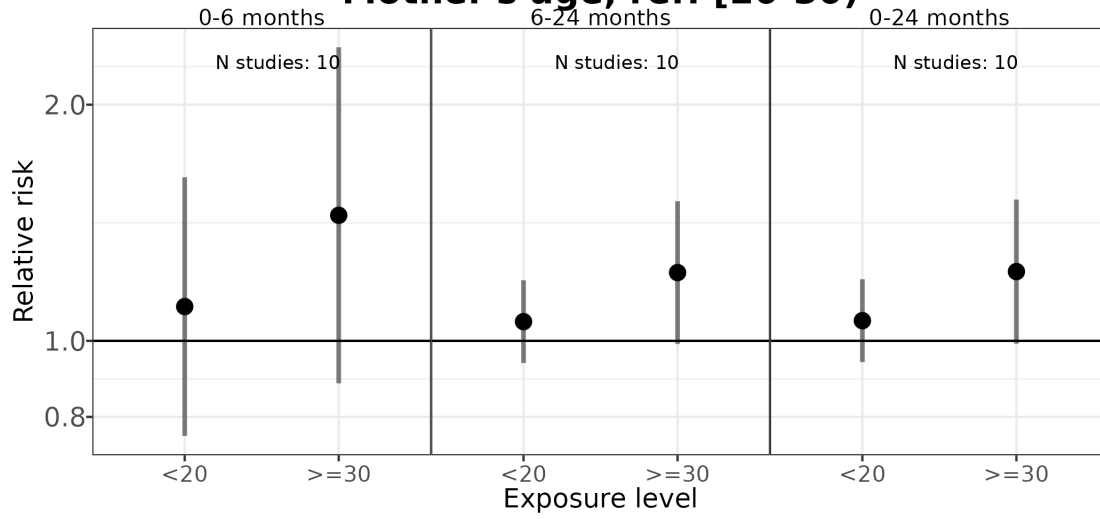

**Outcome: Persistently Wasted**  
**Exposure:**  
**Mother's BMI, ref: ≥20 kg/m<sup>2</sup>**

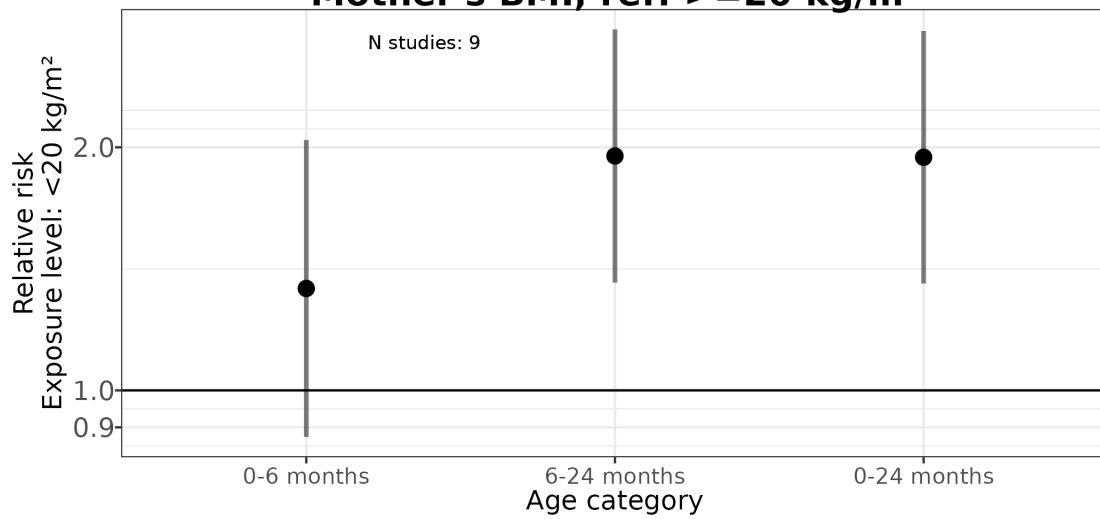

**Outcome: Persistently Wasted**  
**Exposure:**  
**Mother's education, ref: High**

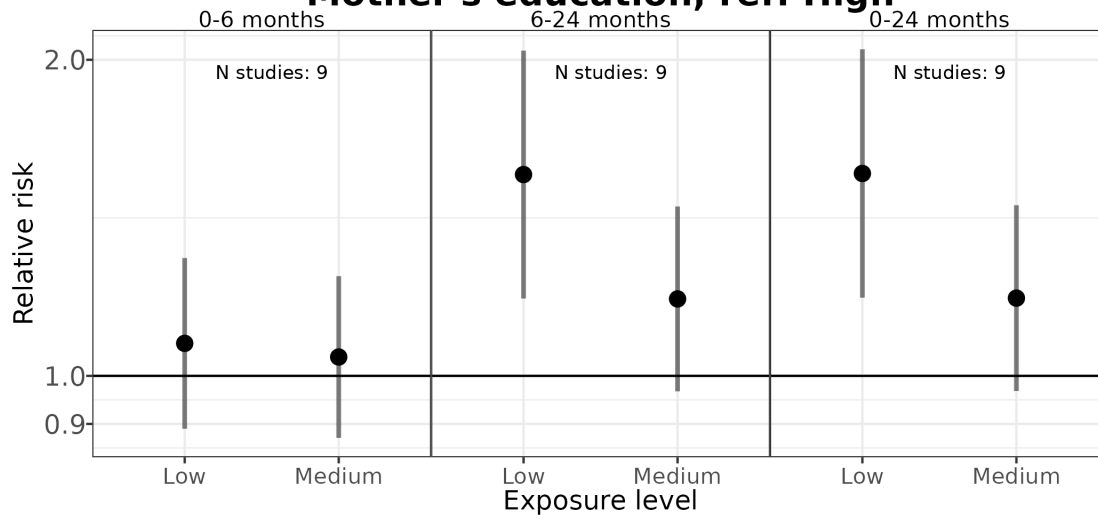

**Outcome: Persistently Wasted**  
**Exposure:**  
**Mother's height, ref:  $\geq 150$  cm**

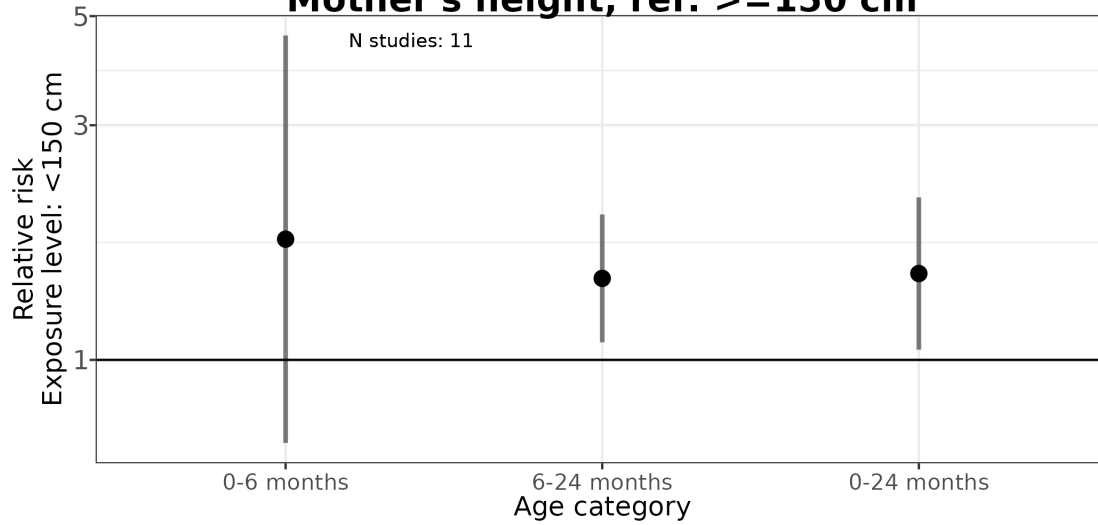

**Outcome: Persistently Wasted**  
**Exposure:**  
**Mother's weight, ref:  $\geq 45$  kg**

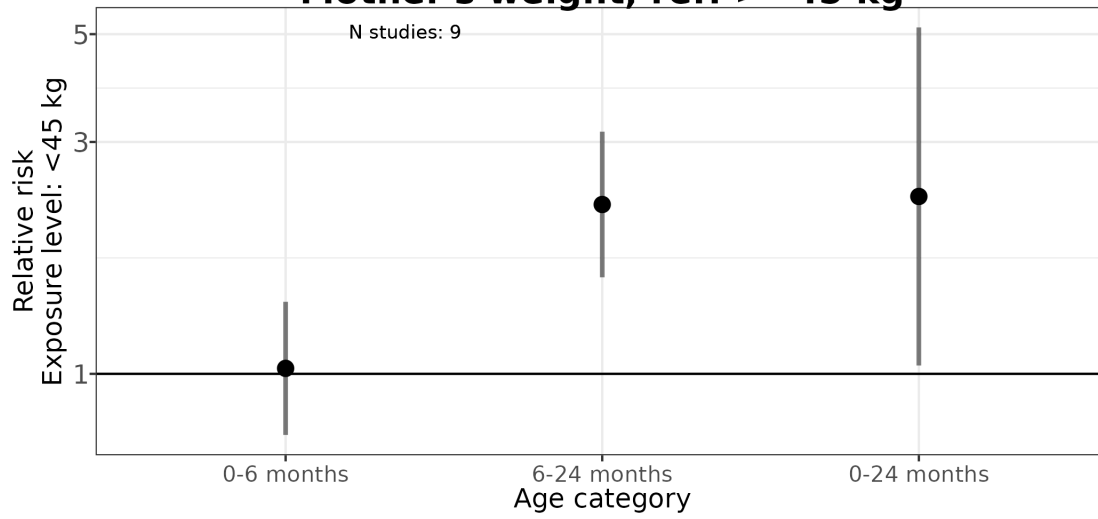

**Outcome: Persistently Wasted**  
**Exposure:**  
**# of children <5 in HH, ref: 1**

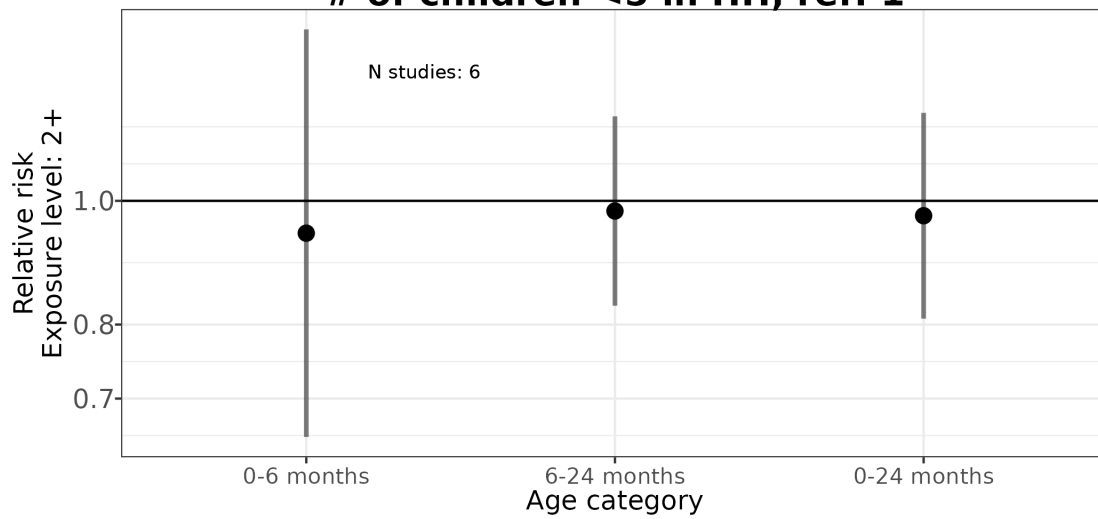

**Outcome: Persistently Wasted**

**Exposure:**

**# of people in HH, ref: 3 or less**

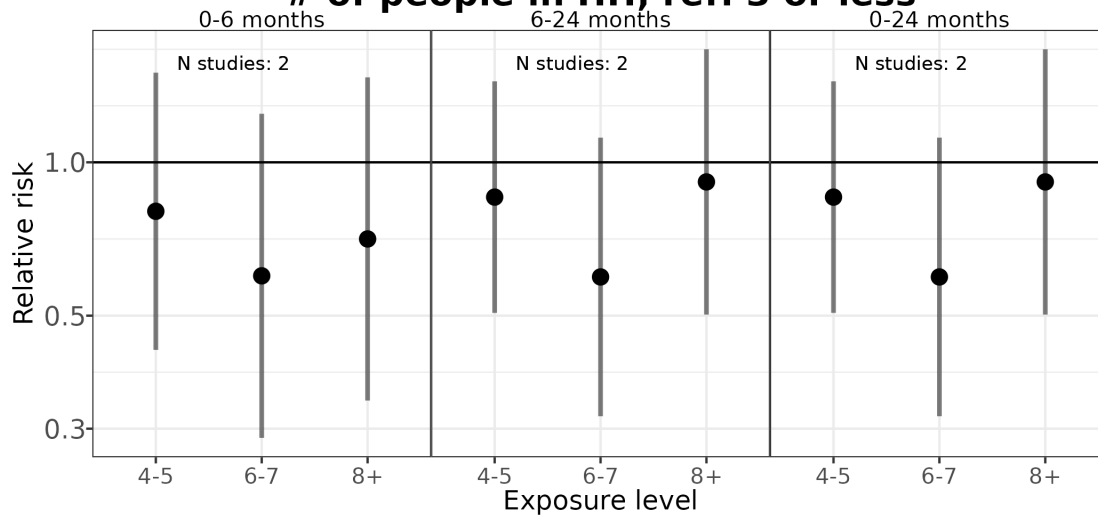

**Outcome: Persistently Wasted**

**Exposure:**

**# of rooms in HH, ref: 4+**

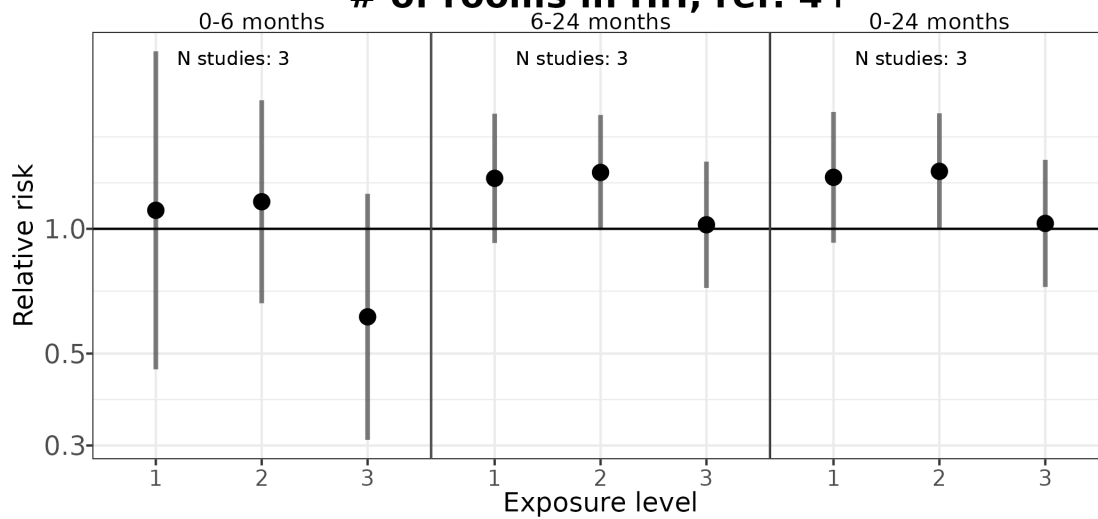



**Outcome: Persistently Wasted**  
**Exposure:**  
**Birth order, ref: 1**

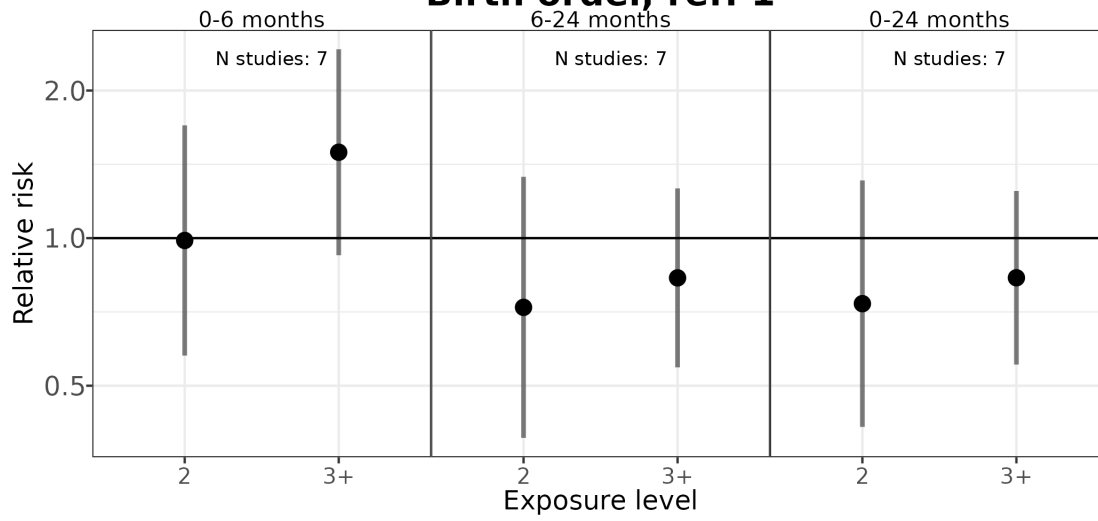

**Outcome: Persistently Wasted**  
**Exposure:**  
**Sex, ref: Female**

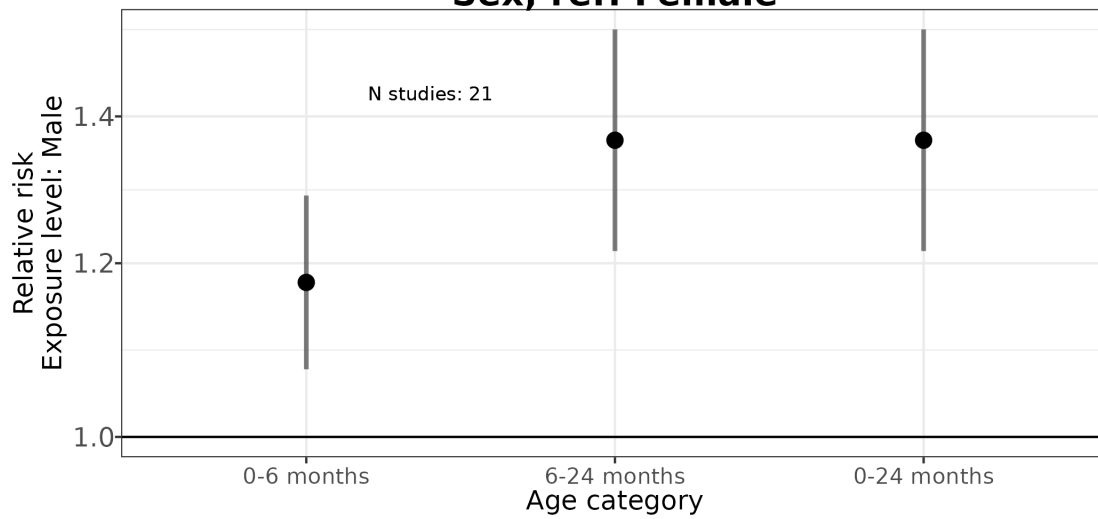

**Outcome: Persistently Wasted**  
**Exposure:**  
**Small-for-gestational age, ref: Not SGA**

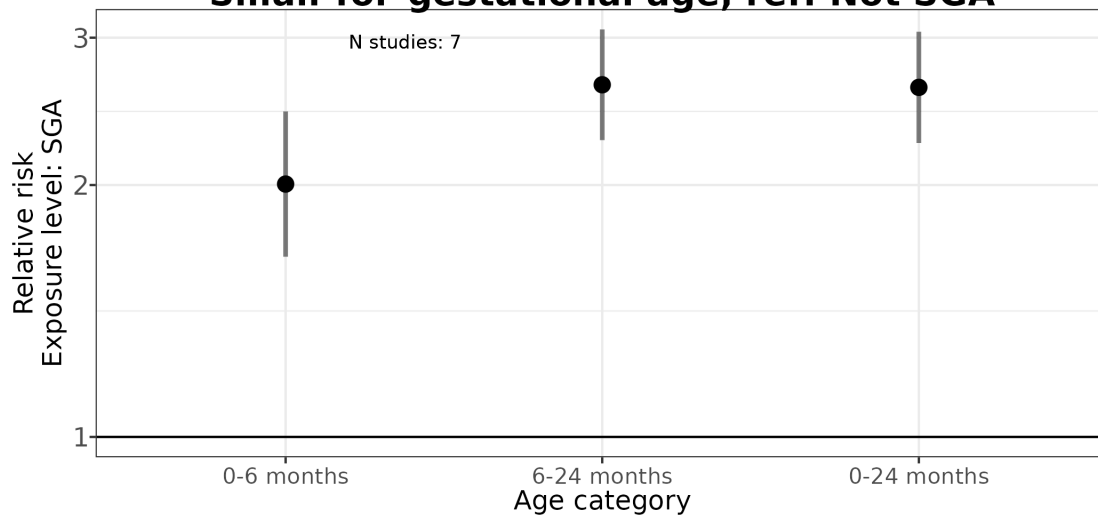

**Outcome: Persistently Wasted**  
**Exposure:**  
**Single parent, ref: 0**

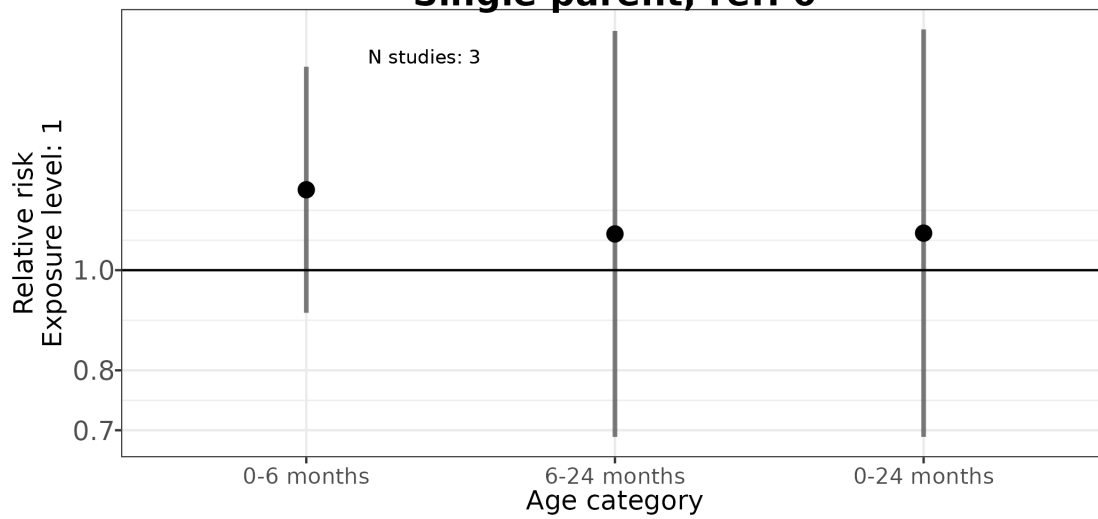

**Outcome: Stunting recovery**  
**Exposure:**  
**Birth length (cm), ref:  $\geq 50$  cm**  
0-24 months

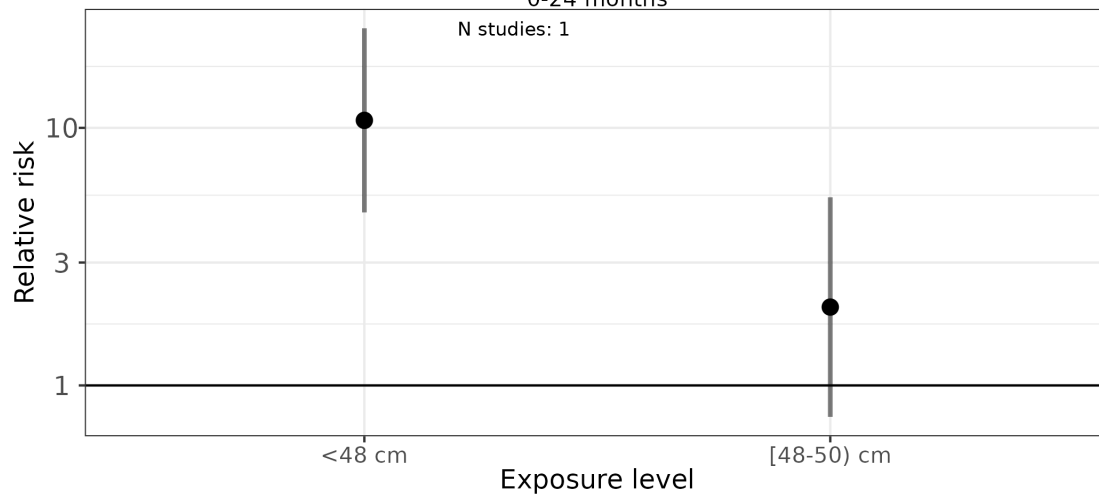

**Outcome: Stunting recovery**  
**Exposure:**  
**Father's education, ref: High**  
0-24 months

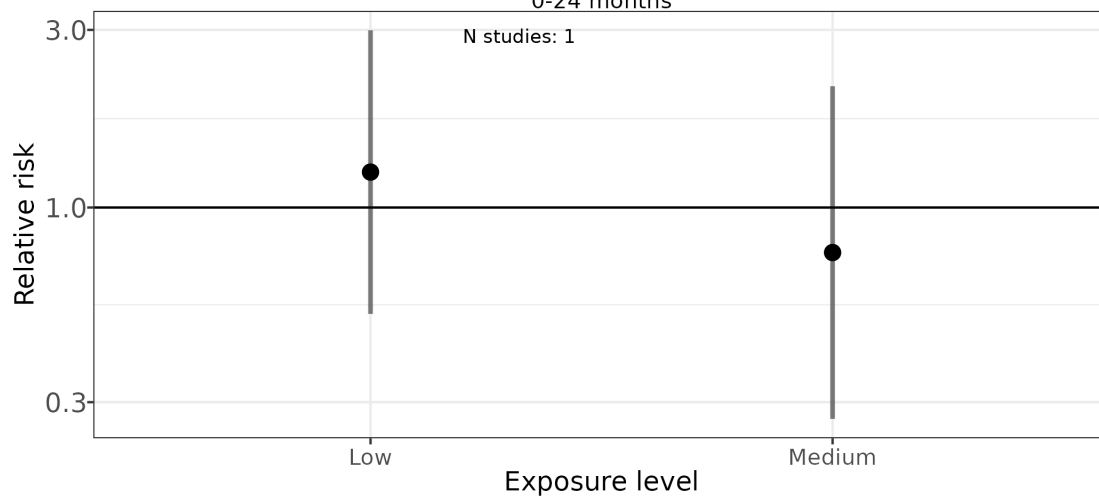

**Outcome: Stunting recovery**  
**Exposure:**  
**Gestational age at birth, ref: Full or late term**  
0-24 months

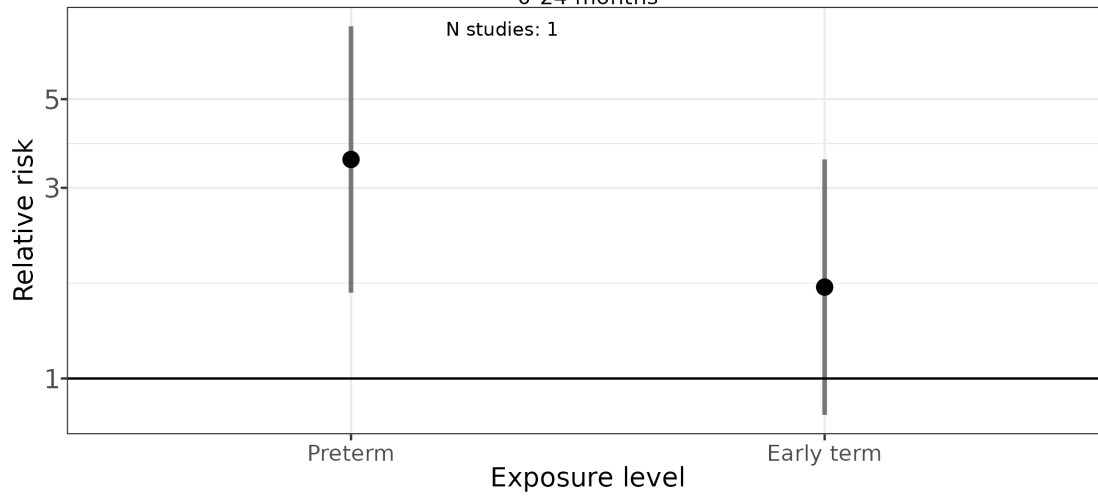

**Outcome: Stunting recovery**  
**Exposure:**  
**HH wealth, ref: Q4**  
0-24 months

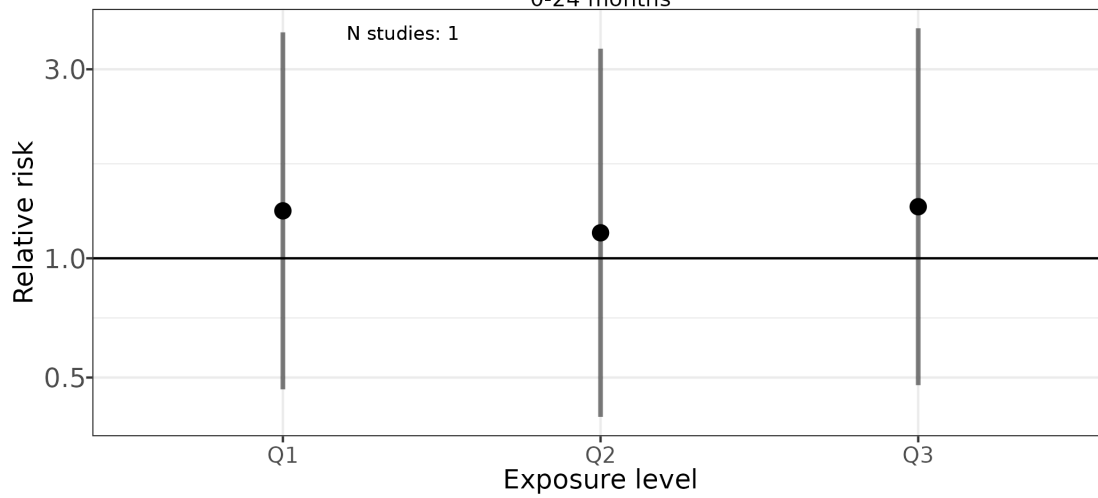

**Outcome: Stunting recovery**  
**Exposure:**  
**Mother's age, ref: [20-30)**  
0-24 months

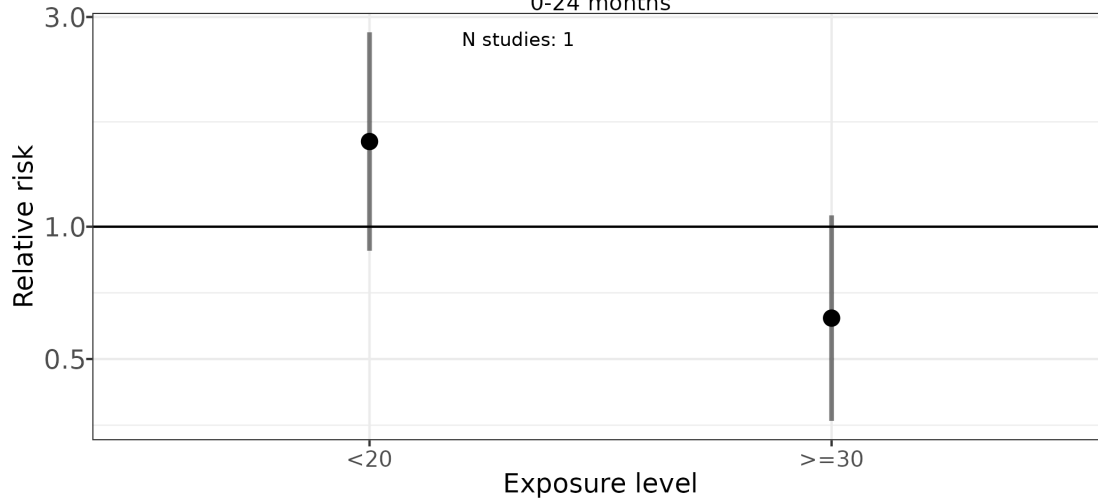

**Outcome: Stunting recovery**  
**Exposure:**  
**Mother's education, ref: High**  
0-24 months

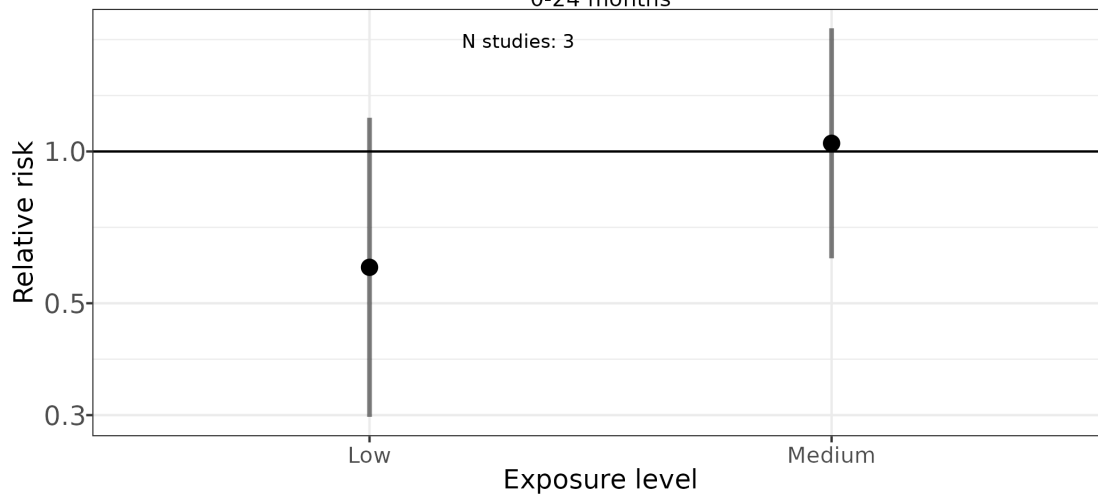

**Outcome: Stunting recovery**

**Exposure:**

**Birth order, ref: 1**

0-24 months

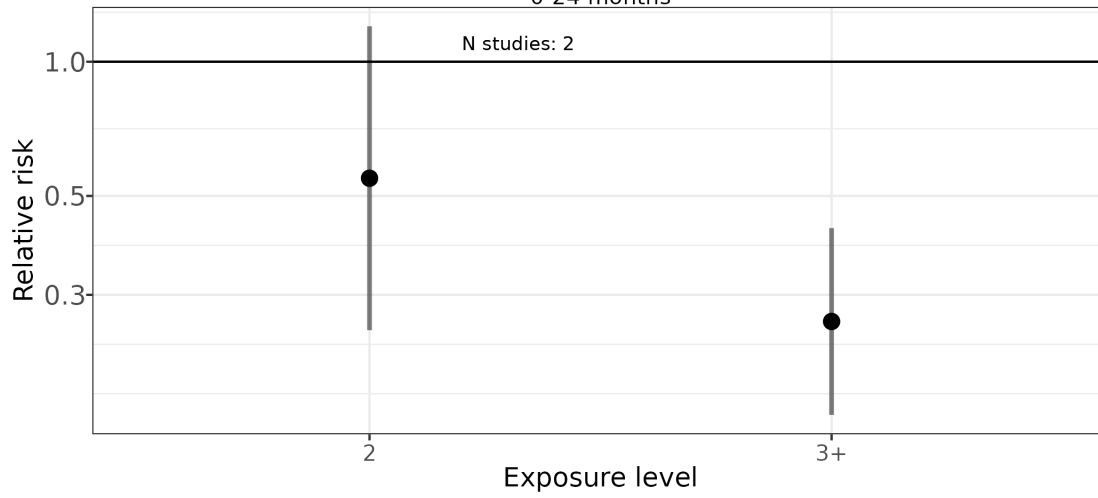

**Outcome: Wasting recovery**

**Exposure:**

**Birth length (cm), ref:  $\geq 50$  cm**

0-6 months

6-24 months

0-24 months

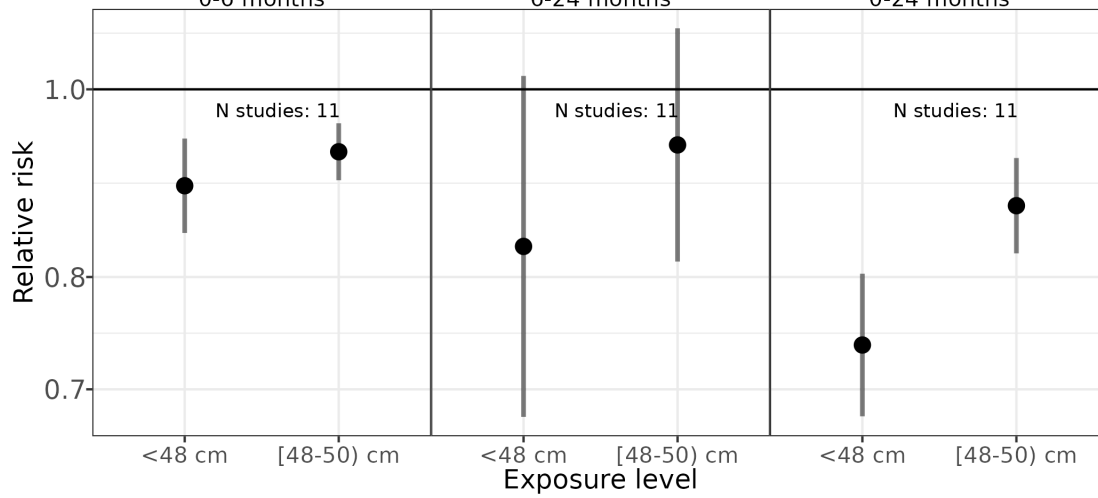

**Outcome: Wasting recovery**  
**Exposure:**  
**Birthweight (kg), ref:  $\geq 2500$  g**

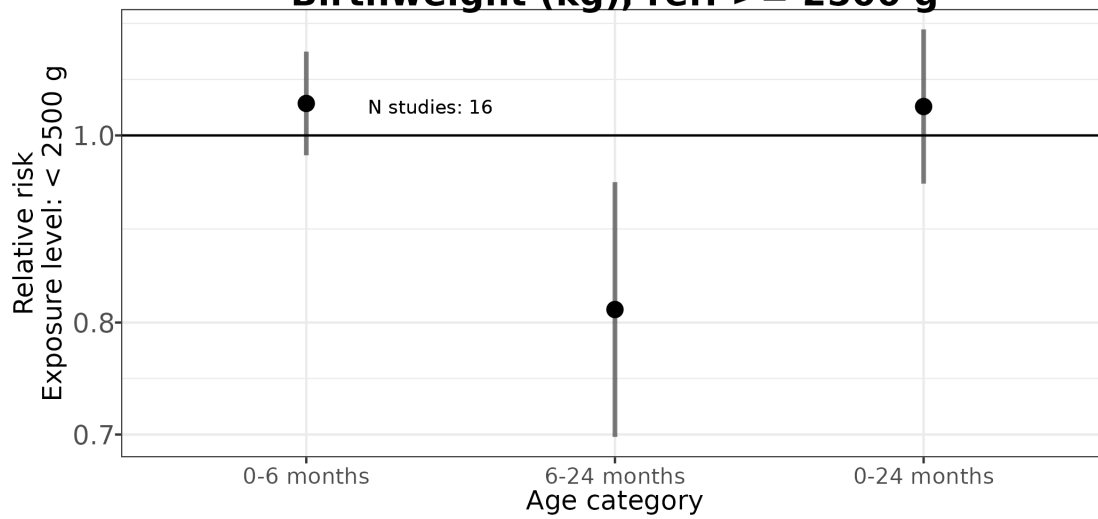

**Outcome: Wasting recovery**  
**Exposure:**  
**Clean cooking fuel usage, ref: Yes**

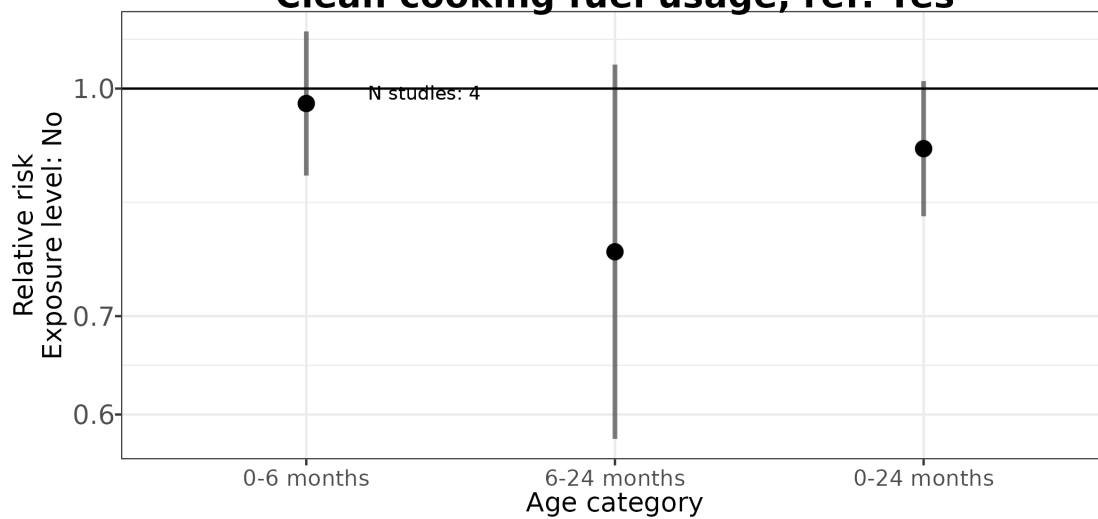

**Outcome: Wasting recovery**  
**Exposure:**  
**Breastfed hour after birth, ref: Yes**

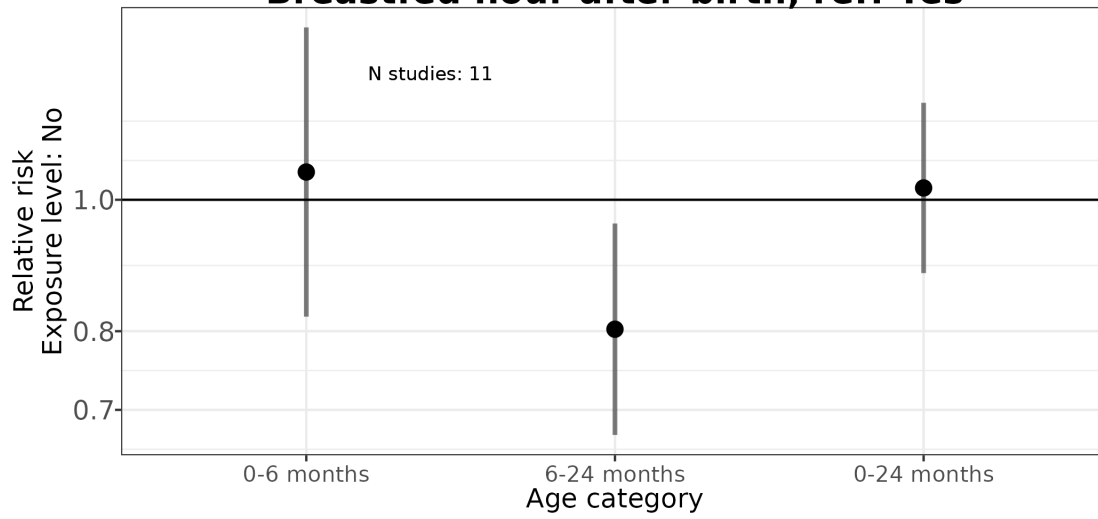

**Outcome: Wasting recovery**  
**Exposure:**  
**Father's age, ref: >=35**

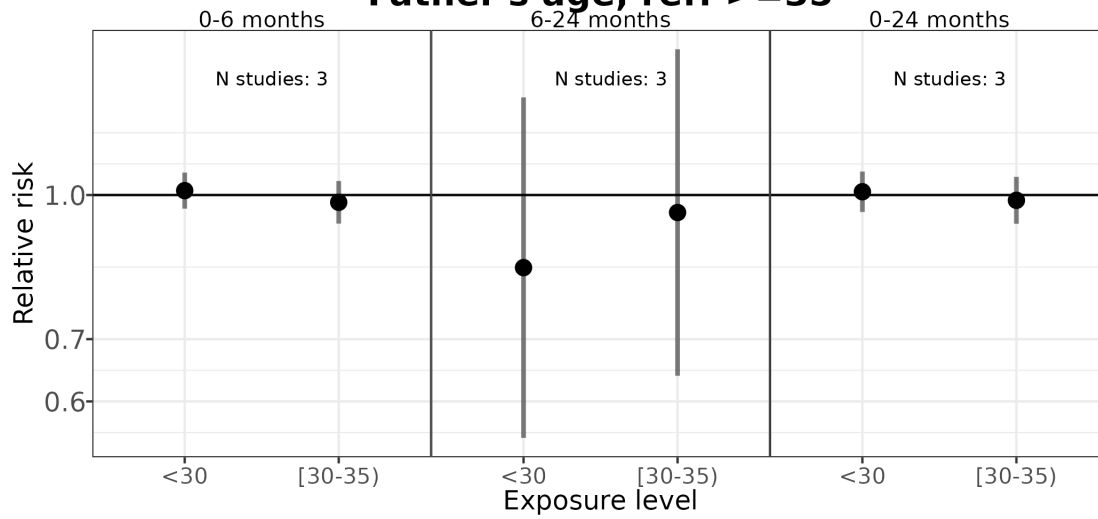



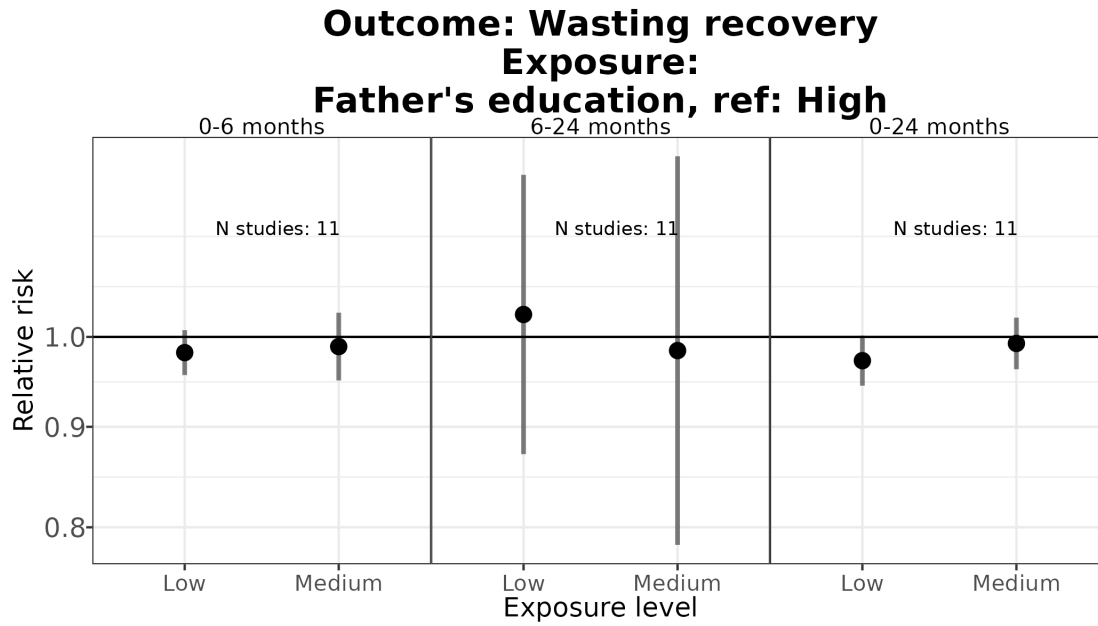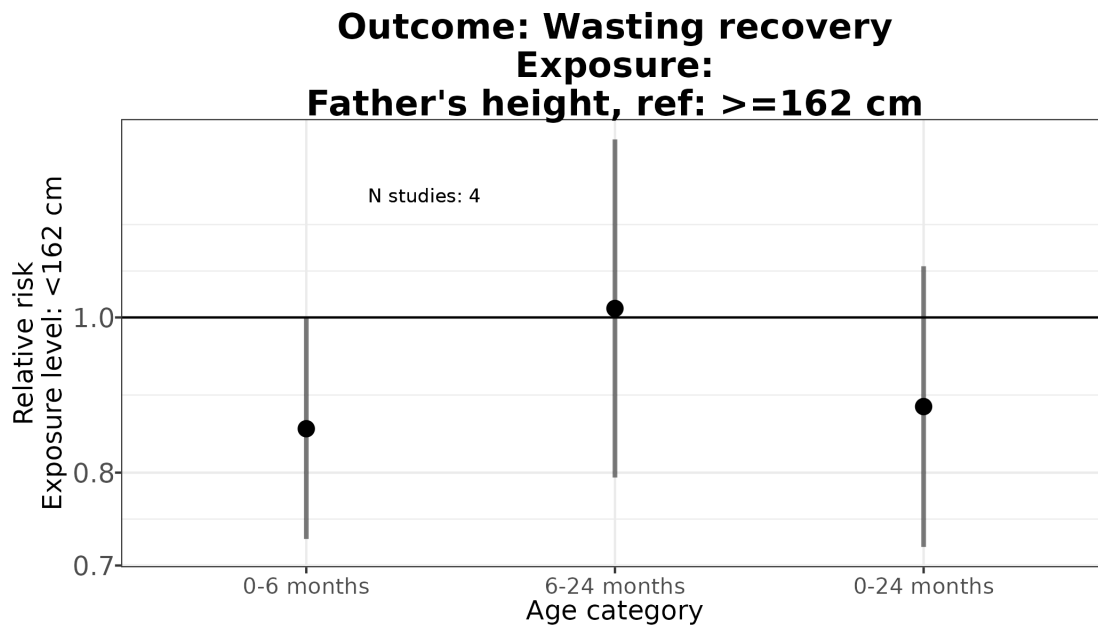

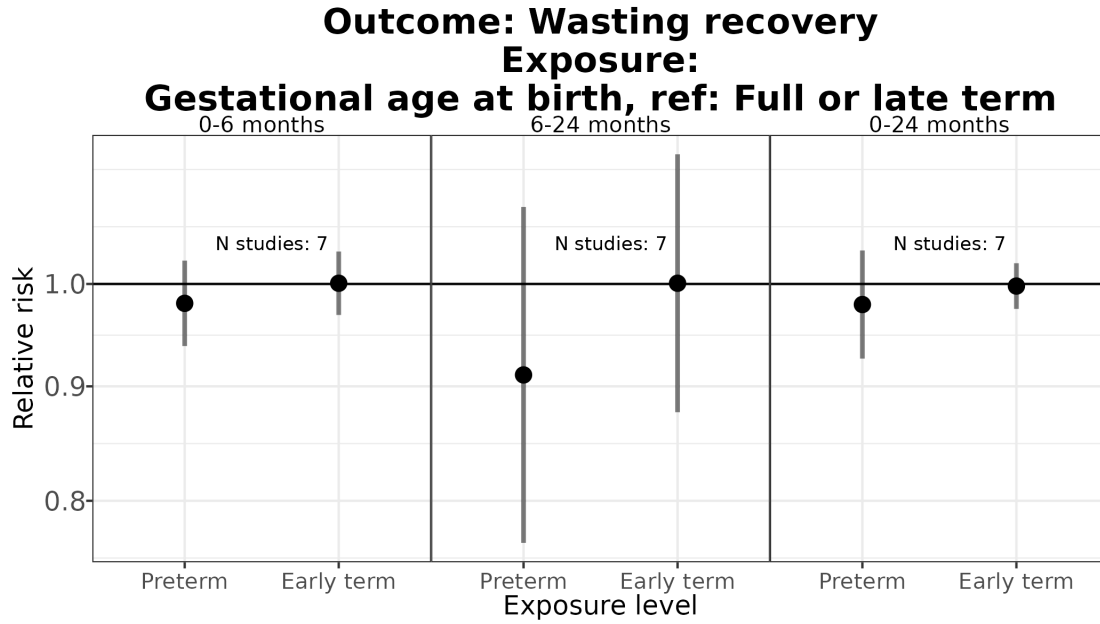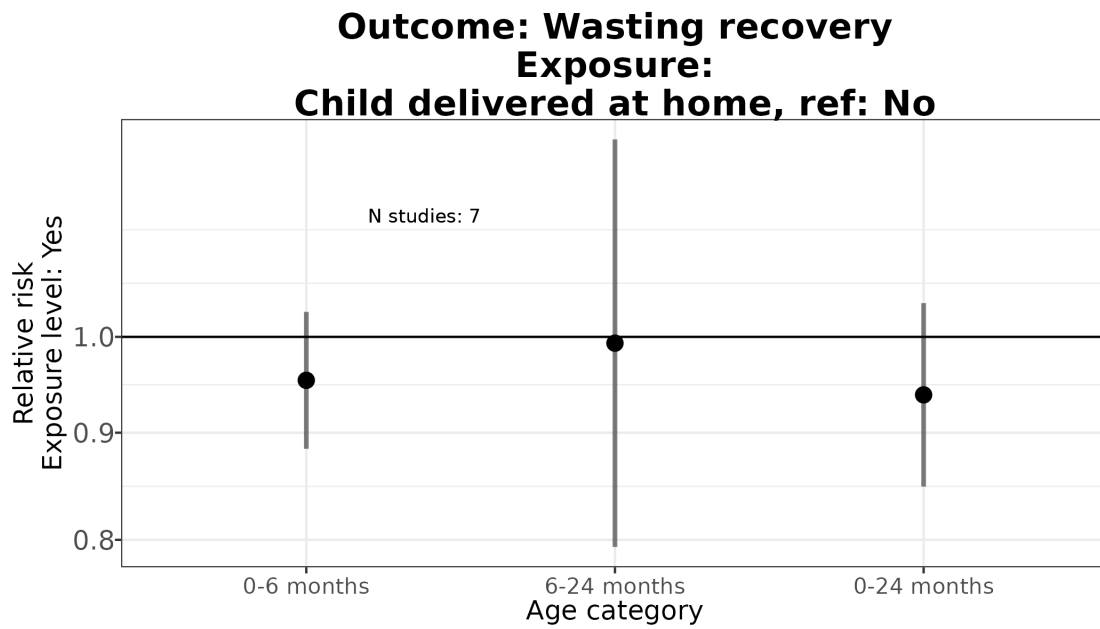

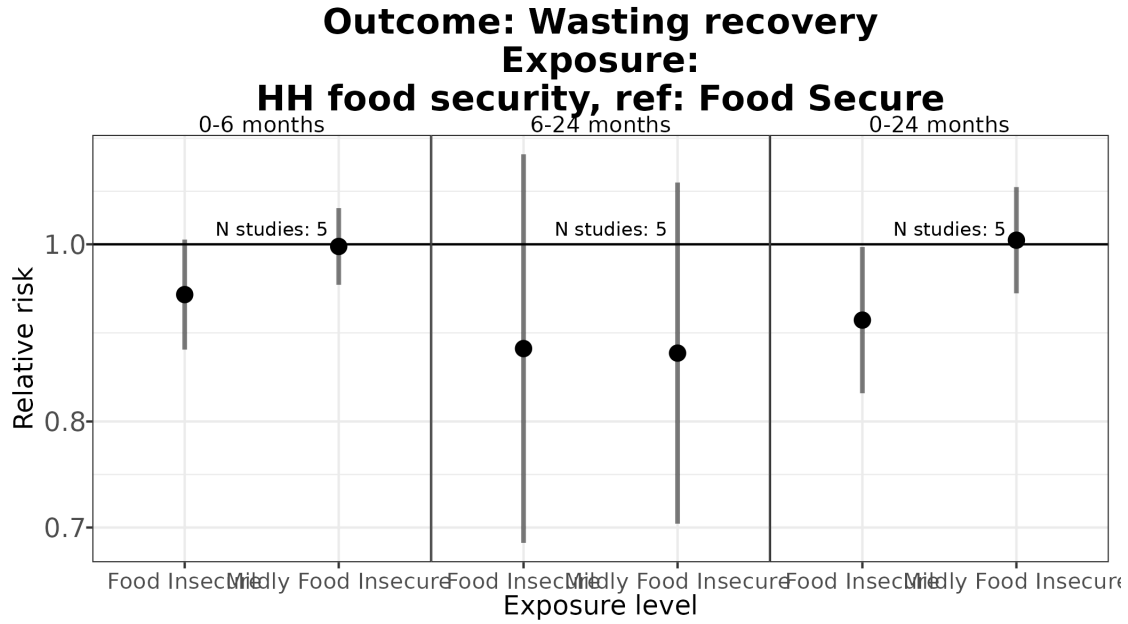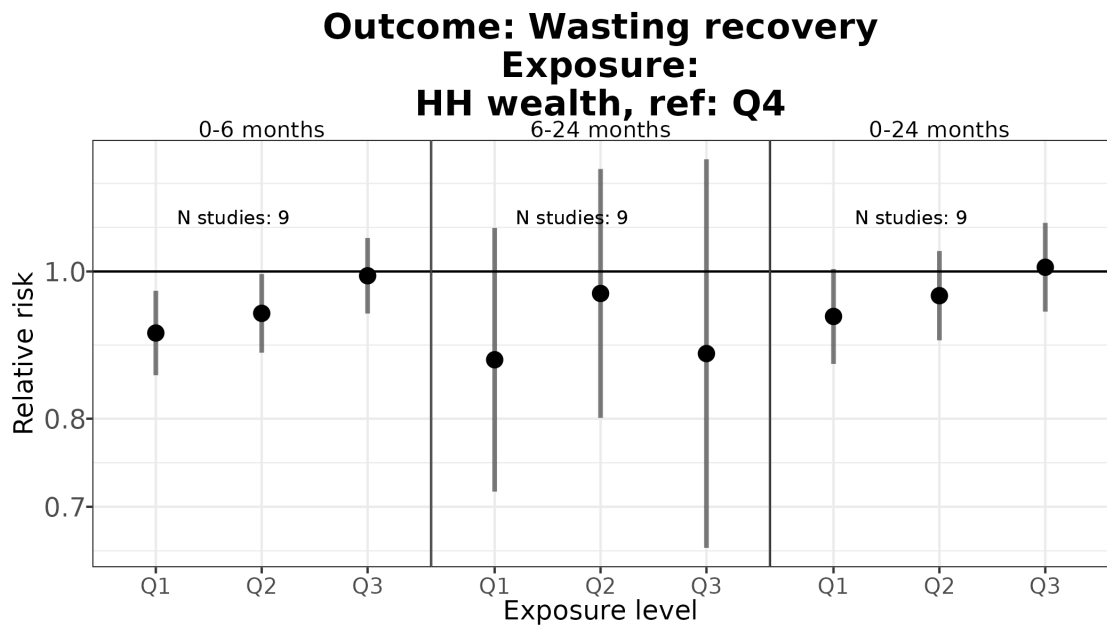

**Outcome: Wasting recovery**  
**Exposure:**  
**Improved floor, ref: Yes**

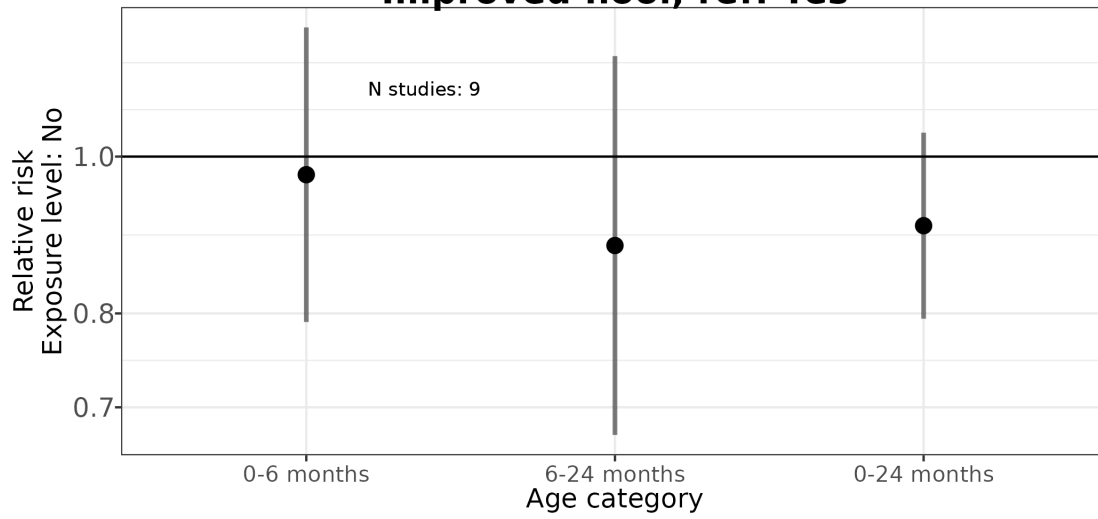

**Outcome: Wasting recovery**  
**Exposure:**  
**Improved sanitation, ref: Yes**

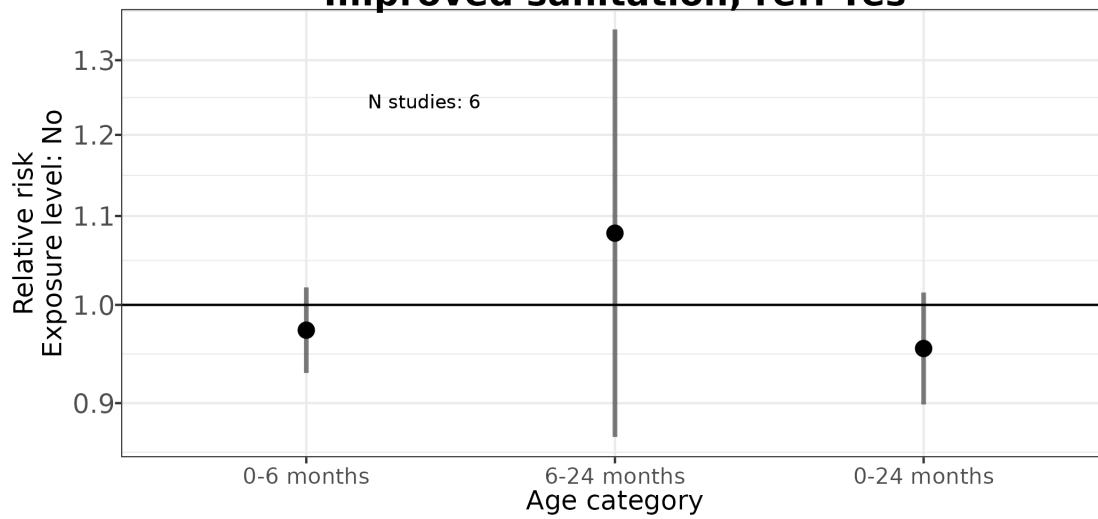

**Outcome: Wasting recovery**  
**Exposure:**  
**Mother's age, ref: [20-30)**

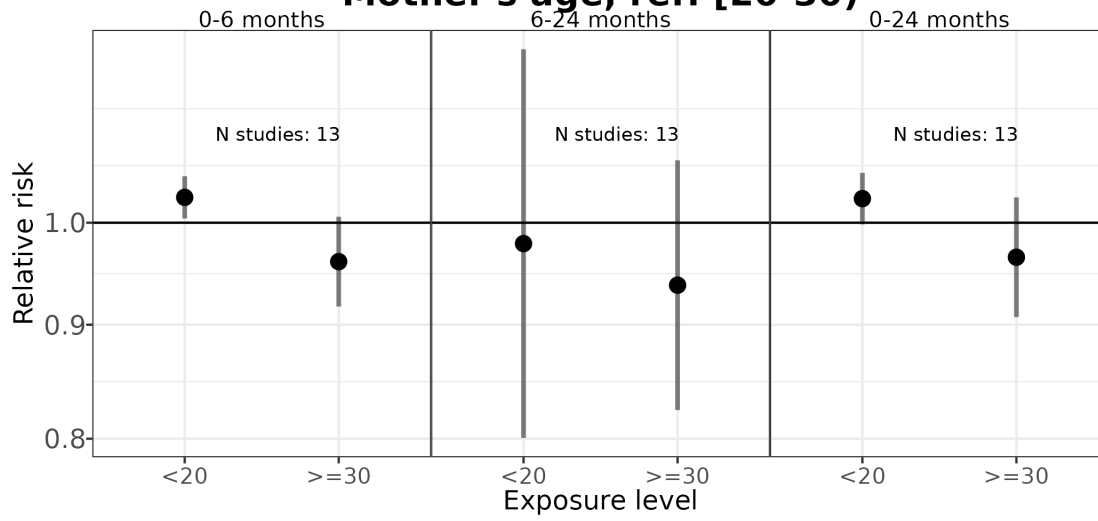

**Outcome: Wasting recovery**  
**Exposure:**  
**Mother's BMI, ref:  $\geq 20$  kg/m<sup>2</sup>**

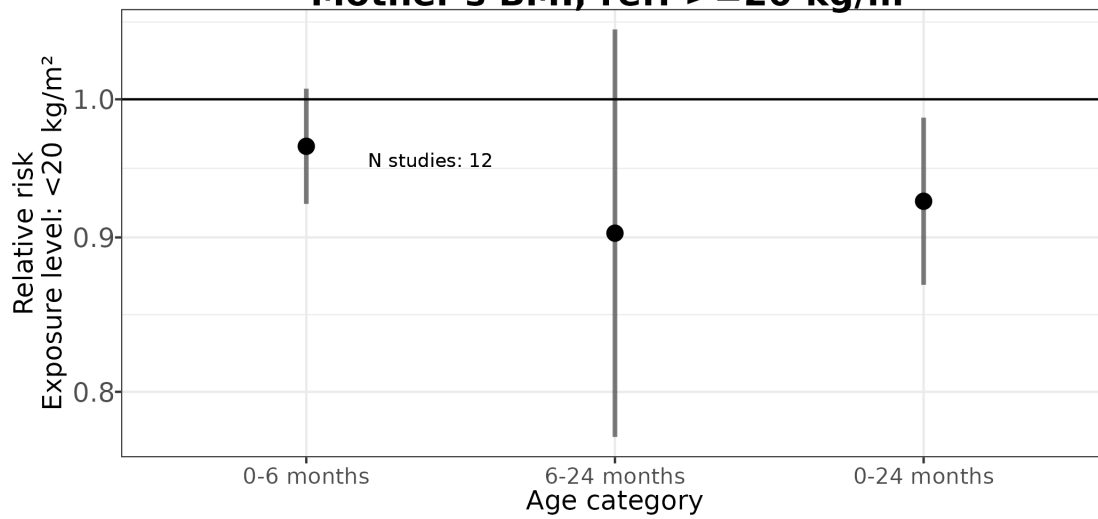

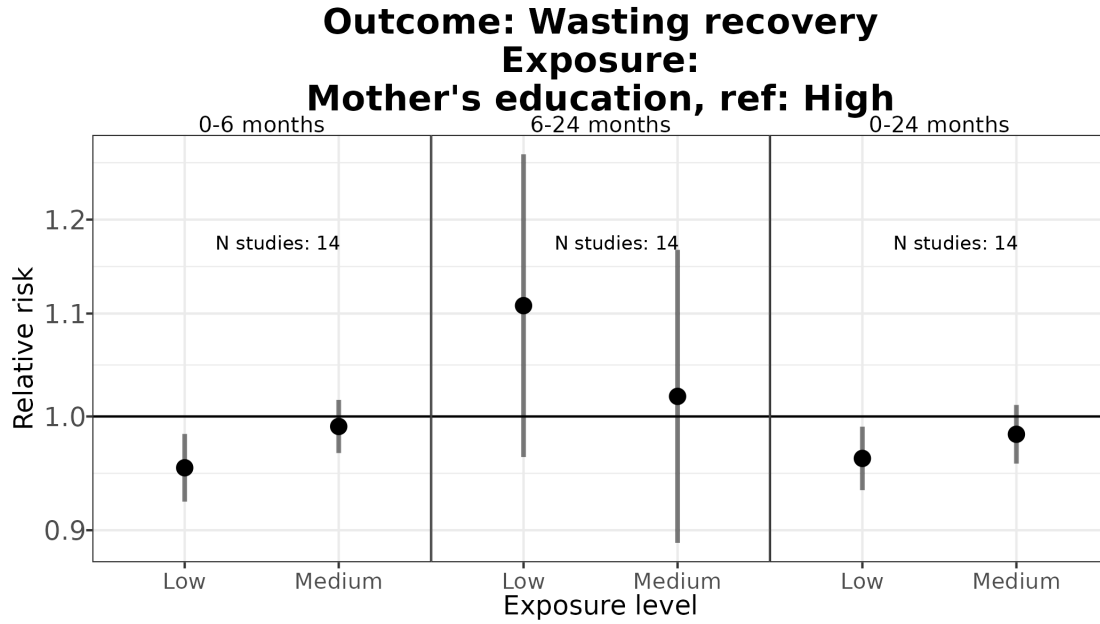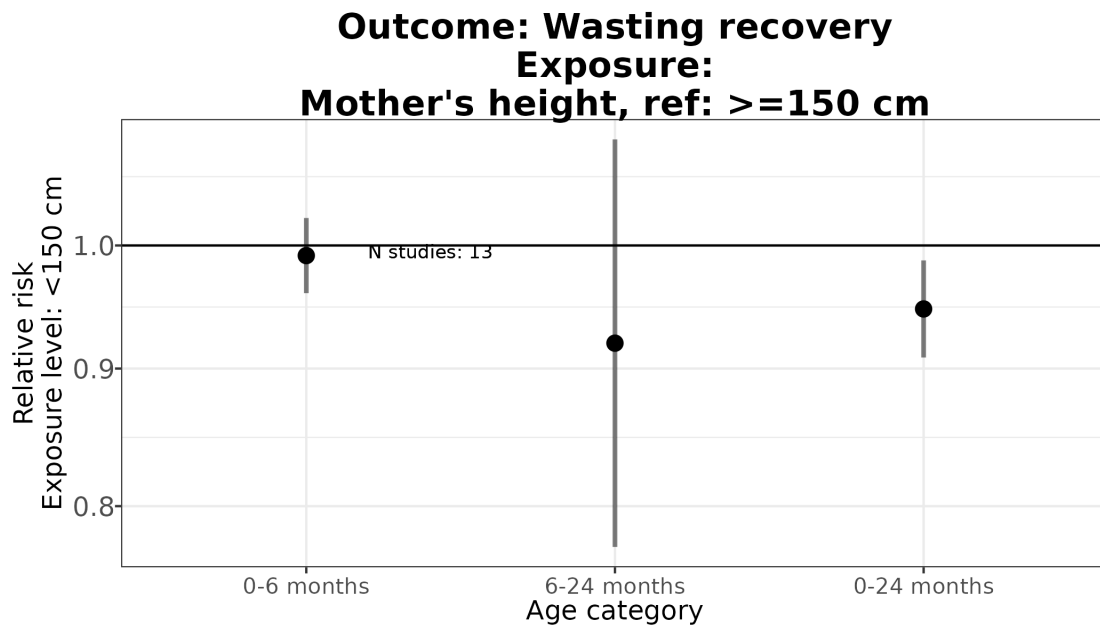

**Outcome: Wasting recovery**  
**Exposure:**  
**Mother's weight, ref:  $\geq 45$  kg**

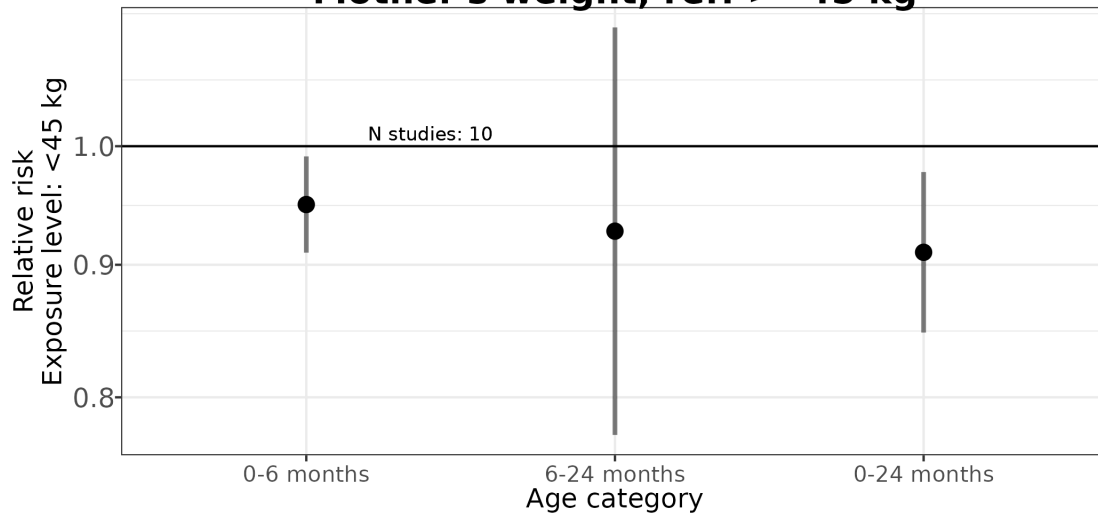

**Outcome: Wasting recovery**  
**Exposure:**  
**# of children <5 in HH, ref: 1**

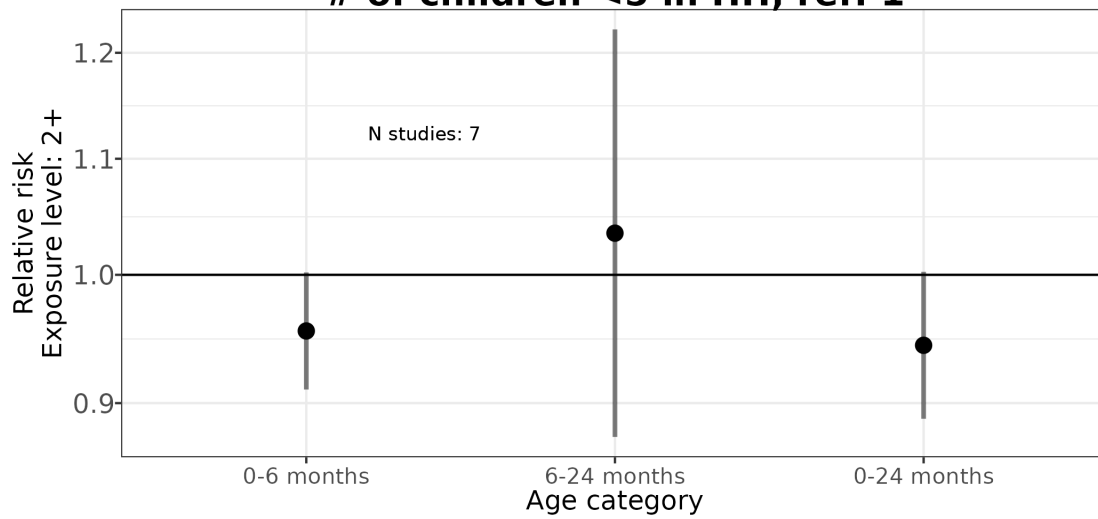

**Outcome: Wasting recovery**

**Exposure:**

**# of people in HH, ref: 3 or less**

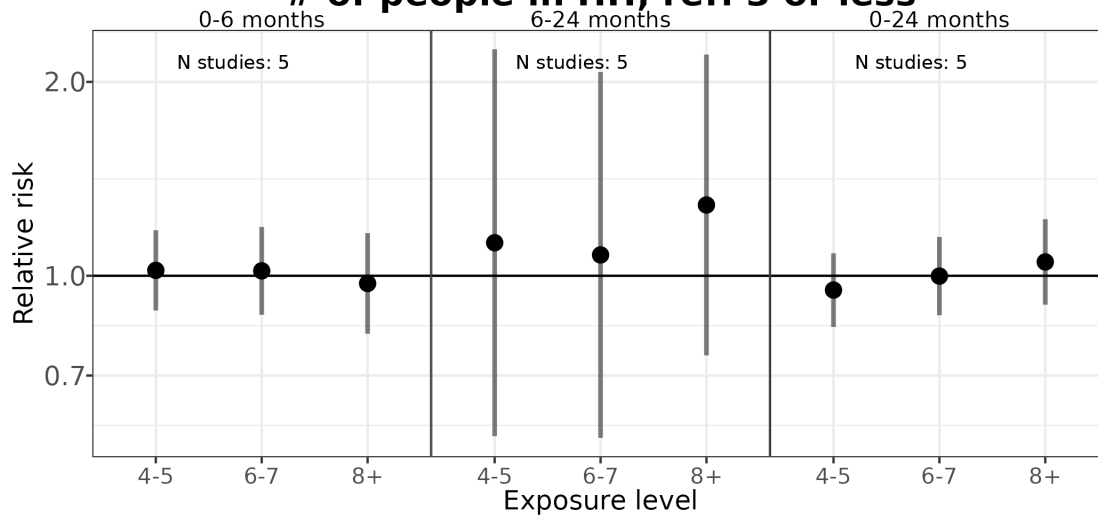

**Outcome: Wasting recovery**

**Exposure:**

**# of rooms in HH, ref: 4+**

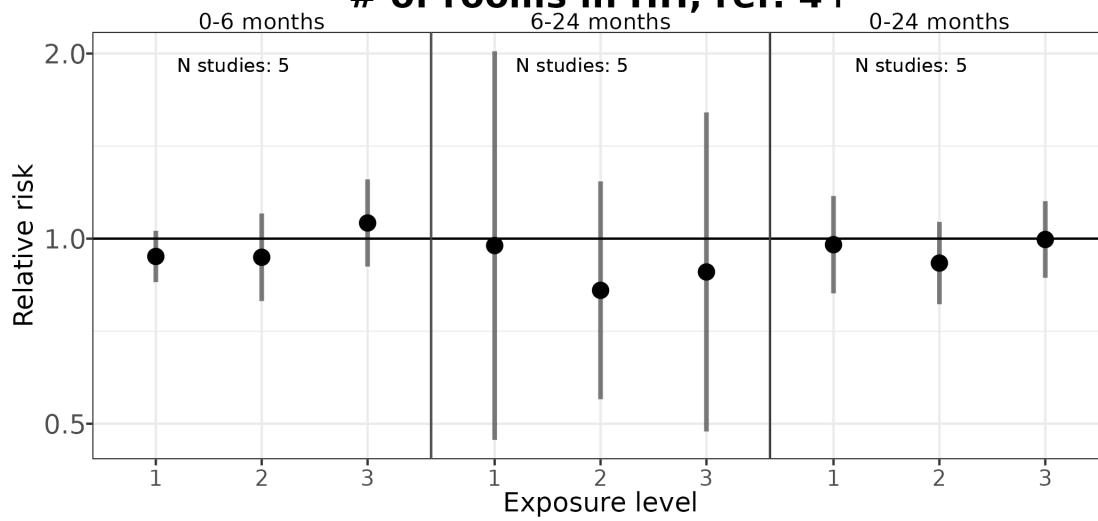



**Outcome: Wasting recovery**  
**Exposure:**  
**Birth order, ref: 1**

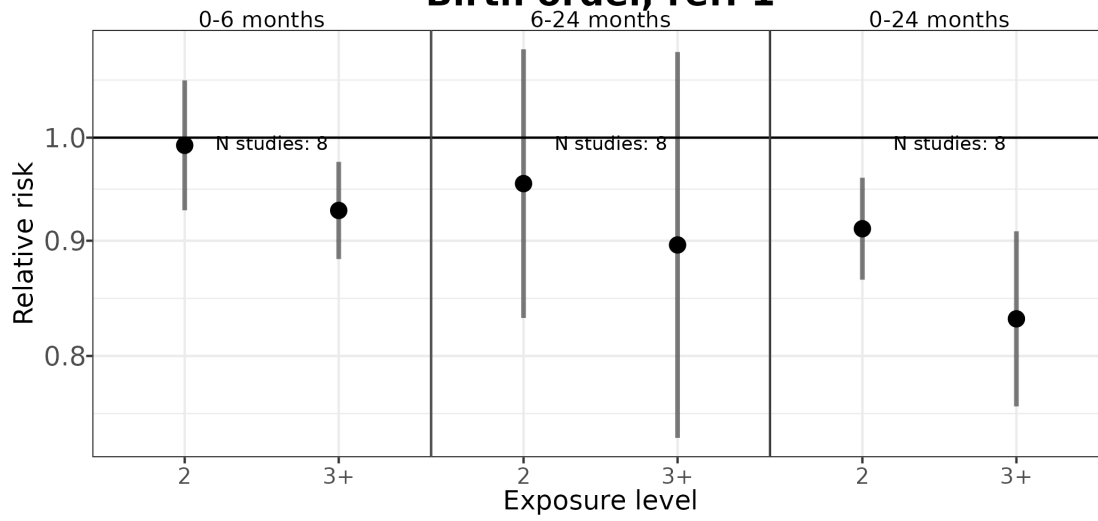

**Outcome: Wasting recovery**  
**Exposure:**  
**Sex, ref: Female**

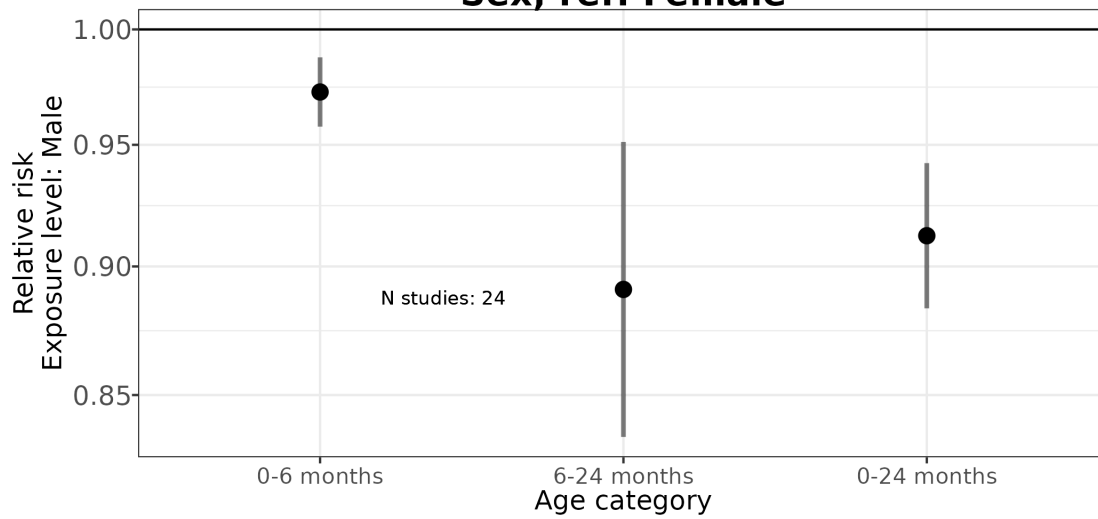

**Outcome: Wasting recovery**  
**Exposure:**  
**Small-for-gestational age, ref: Not SGA**

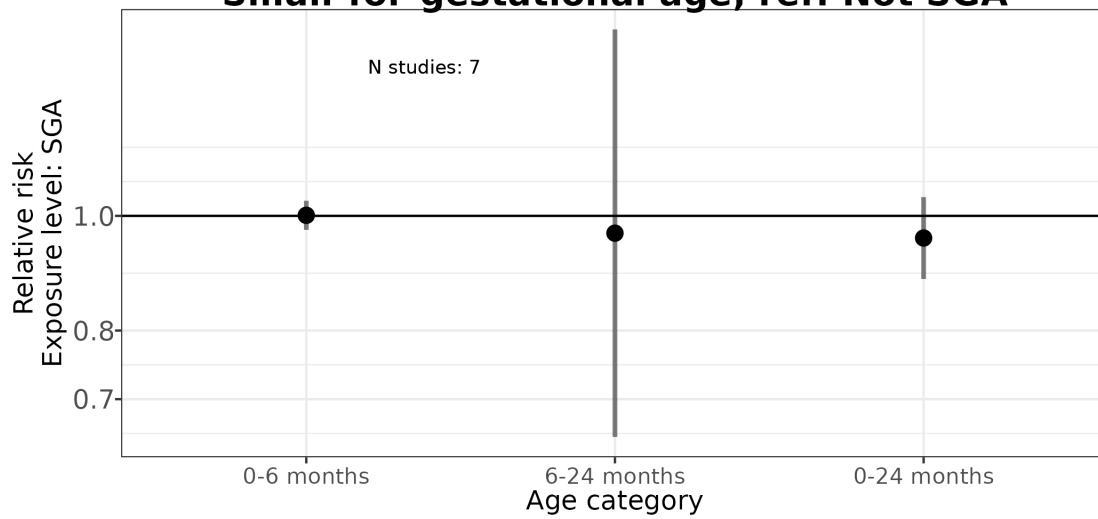

**Outcome: Wasting recovery**  
**Exposure:**  
**Single parent, ref: 0**

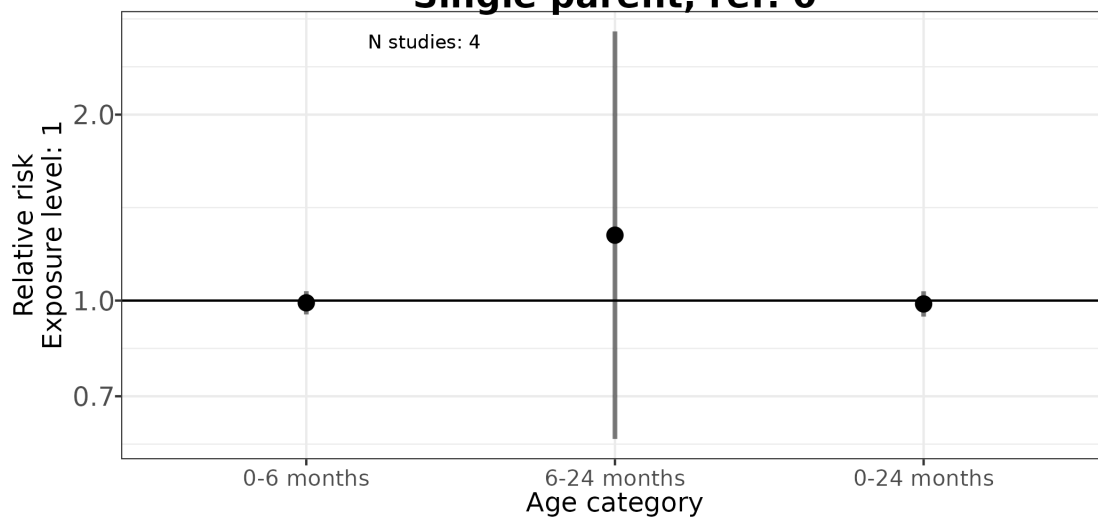

Supplement: 41586_2023_6501_MOESM1_ESM.pdf [file 41586_2023_6501_MOESM1_ESM.pdf]
